# Supplementary material
Source: Research Square preprint supplement (doi:10.21203/rs.3.rs-9267285/v1)

### Sample collection

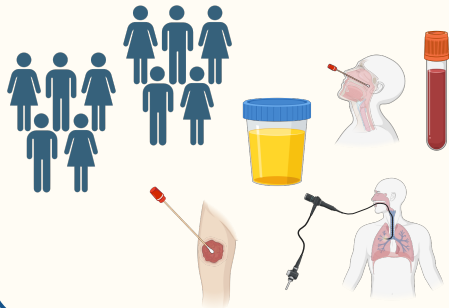

### Bacterial identification and ABG

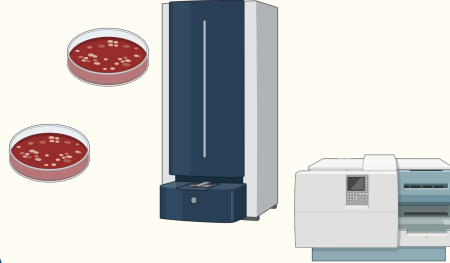

### Sample set

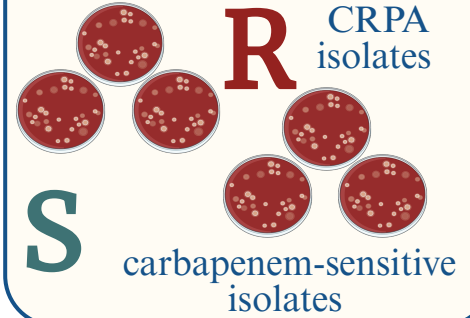

### Sample preparation for proteomics analysis

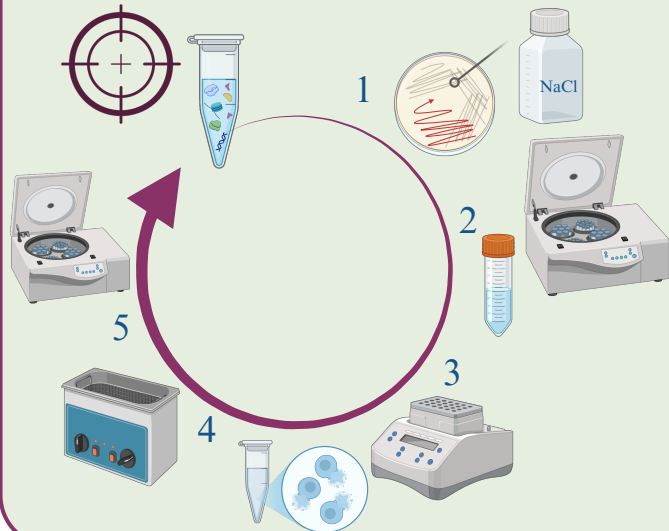

### PAC protocol

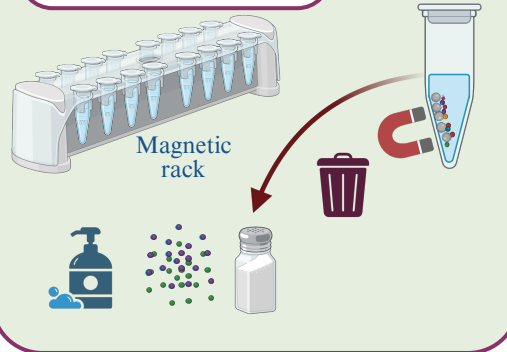

### LC-MS/MS

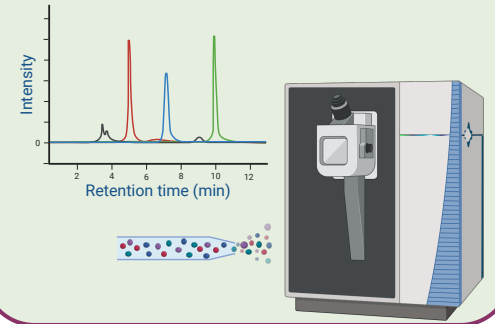

Supplement: Supplementary file 1 [file 5a6783a89066805149ad3a67.pdf]
