# Supplementary material
Source: Research Square preprint supplement (doi:10.21203/rs.3.rs-9267285/v1)
Supplement: Supplementary file 1 [file f054a2b56333b48d37da221a.xlsx]

## Sheet: Table S1
Table S1. Antibiotic susceptibility of CRPA isolates
	R01	R02	R03	R04	R05	R06	R07	R08	R09	R10	R11	R12	R13	R14	R15	R16
Amikacina	S 2	S 2	S 4	S 4	S 4	S 4	R >32	S 8	R >=64	S 4	S 4	R >32	S 4	S 4	S 2	S 8
Cefepime	R 16	I 8	R >16	R 8	R >=32	R >16	R >16	R >16	R >=32	R >16	I 8	R >16	I 2	I 8	I 8	R >16
Ceftazidime	R 32	I 8	R >32	R 16	R >=164				R >=64	R >32	I 2	R >32		I 2	I 2
Ciprofloxacin	I 0,5	I 0,5	R >2	R 1	R 1				R >=4	R >2	I 0.5	R >2		R >2	I 0.12
Colistin	S 2	S 2	S <=0.5	S <=0.5	S <=0.5	S 1	S 1	S 1	S <=0.5	S 2	S <=0.5	S 2	S 1	S <=0.5	S <=0.5	S 1
Fosfomycin	S 128		S 64	S 32	S 64						>128	R >128		S 32
Meropenem	R > 8	R > 8	R >8	R >8	R >=16	R >16	R 16	R >16	R >=16	R >8	R >8	R >8	R 16	R >8	I 8	R >16
Piperacillina/Tazobactam	R > 64	R 32	R > 64	R 32	R >=128	R >32	R 32	R >32	R >=128	R >64	R 32	R 64	R 32	I 16	I 16	R >32
Eravacycline						R >0.5	R >0.5	R >0.5					R >0.5			R >0.5
Fosfomycin glucose 6 fosfate						R >64	R >64	R 64					R >64			>64
Imipenem/Relebactam	R 6	S 0,75	S 0,75	R 32	R 32	R 8	S 2	R >8	R 4		S 2	R 3	R 8	R 3	S 1	R >8
Meropenem/Varbobactam	R 16	R 25	S 0,5	S 8	R 24	R >16	R 16	R >16	R 32		R 12	R 32	S 8	R12	S 4	R >16
Aztreonam						I 4	R >32	I 16					I 8			R >32
Ceftazidime/Avibactam	S 4	S 8	S 3	S 4	R 256	R >16	R >16	R >16	R 256	R >8	S 4	R 256	S 2	S 3	S 2	R >16
Ceftalozane/ Tazobactam	S 1,5	S 1	S 1	S 1	R 256	R >8	R >8	R >8	R 256	R >16	S1.5	R 256	S 1	S 1	S 0.5	R >8
Imipenem		R > 8				R 8	R 8	R >8		R >8			R >8		R >8	R >8
Tigecycline						R >1	R >1	R >1					R >1			R >1
Tobramycin		S <= 1				R >4	R >4	R >4		R >8			S <=0.5		S <=1	R >4
Gentamicin					R >=16				R >=16
Cefiderocol mm	S 30	S 24	S 22	S 25	S 22	S 28	R 20	R 16	S 22	S 28	S 26	R 21	S 33	S 30	S 26	S 22

## Sheet: Table S2
Table S2. Antibiotic susceptibility of carbapenem-sensitive isolates
	S 01	S 02	S 03	S 04	S 05	S 06	S 07	S 08	S 09	S 10	S 11	S 12	S 13	S 14	S 15	S 16	S17	S18
Amikacina	S 2	S 4	S 2	S 2	S 4	S 2	S 4	S 4	S 4	S 2	S 4	S <= 1	S 2	S <= 1	S 2	S 4	S 2	S 2
Cefepime	I 2	I 2	I 2	I 4	I 8	I 2	I 8	I 2	I 2	I 2	I 2	I 8	I 8	I 8	I 4	I 2	I 0.12	I 2
Ceftazidime	I 2	I 2	I 2	I 2	I 8	I 2	I 2	I 2	I 2	I 2	I 2	I 2		I 8	I 2	I 2	I 0.12	I 2
Ciprofloxacin	I 0.5	S <= 0.06	S 0.25	I 0.5	S 0.5	S 0.12	I 0.25	S 0.12	S 0.25	I 0.5	I 0.25		I 0.5	I 0.5	I 0.5	I 0.5	I <= 0.06	I 0.12
Colistin		S 1			S 2			S 2	S 2	S 1	S 1	S 2	S <= 0.5	S <= 0.5	S <= 0.5		S <= 0.25	I 0.25
Levofloxacin	I 1	S <= 0.12	S 1	I 2	S 1	S 0.25	I 1										I <= 0.12
Fosfomycin							S 64								S 128
Meropenem	S <= 0.25	S <= 0.25	S <= 0.25	S 1	S 0.5	S 1	S <= 0.25	S <= 0.25	I 4	S <= 0.25	S <= 0.25	S 1	S 0.5	R > 8	S <= 0.25	S 0.5	S <= 0.25	S <= 0.25
Piperacillina/Tazobactam	I 8	S <= 4	S <= 4	I 16	I 16	S <= 4	I 16	I 8	I 8	I 8	I 8	I 8	I 16	R 64	I 8	I 16	I <= 4	I <= 4
Imipenem/Relebactam								S 0.5	S 2
Aztreonam								I 16	I 4
Ceftazidime/Avibactam								S 2	S 2	S 2		S 2	S 2	S 2		S 2
Ceftalozane/ Tazobactam								S 1	S 1	S 0.5		S 1	S 1	S 1		S 0.5
Imipenem								I 2	R >8	I 1		I 2	I 1	R 2		I 2
Tobramycin								S <= 1	S <= 1	S <= 1		S <= 1	S <= 1	S <= 1		S <= 1
Gentamicin										IE <=1		<= 1				IE 2

## Sheet: Table S3
Table S.3 Quantified proteins in each sample (ATCC, CRPA (R) and carbapenem-sensitive strains(S))
PG.Protein Groups	PG.ProteinAccessions	PG.Genes	PG.Protein Descriptions	PG.UniProtIds	PG.Protein Names	PG.Fasta Headers	PG.Molecular Weight	[1] Pseudomonas aeruginosa_ATCC_02.raw.PG.Quantity	[2]Pseudomonas aeruginosa_ATCC_03.raw.PG.Quantity	[3] Pseudomonas aeruginosa_ATCC_04.raw.PG.Quantity	[4] Pseudomonas aeruginosa_ATCC_05.raw.PG.Quantity	[5]Pseudomonas aeruginosa_ATCC_01.raw.PG.Quantity	[6] Pseudomonas aeruginosa_R01.raw.PG.Quantity	[7]Pseudomonas aeruginosa_R02.raw.PG.Quantity	[8]Pseudomonas aeruginosa_R03.raw.PG.Quantity	[9] Pseudomonas aeruginosa_R04.raw.PG.Quantity	[10] Pseudomonas aeruginosa_R05.raw.PG.Quantity	[11] Pseudomonas aeruginosa_R06.raw.PG.Quantity	[12] Pseudomonas aeruginosa_R07.raw.PG.Quantity	[13] Pseudomonas aeruginosa_R08.raw.PG.Quantity	[14]Pseudomonas aeruginosa_R09.raw.PG.Quantity	[15] Pseudomonas aeruginosa_R10.raw.PG.Quantity	[16]Pseudomonas aeruginosa_R12.raw.PG.Quantity	[17]Pseudomonas aeruginosa_R13.raw.PG.Quantity	[18] Pseudomonas aeruginosa_R11.raw.PG.Quantity	[19]Pseudomonas aeruginosa_R14.raw.PG.Quantity	[20] Pseudomonas aeruginosa_R15.raw.PG.Quantity	[21] Pseudomonas aeruginosa_R16.raw.PG.Quantity	[22] Pseudomonas aeruginosa_S01.raw.PG.Quantity	[23] Pseudomonas aeruginosa_S11.raw.PG.Quantity	[24] Pseudomonas aeruginosa_S04.raw.PG.Quantity	[25] Pseudomonas aeruginosa_S05.raw.PG.Quantity	[26] Pseudomonas aeruginosa_S06.raw.PG.Quantity	[27] Pseudomonas aeruginosa_S12.raw.PG.Quantity	[28] Pseudomonas aeruginosa_S13.raw.PG.Quantity	[29] Pseudomonas aeruginosa_S14.raw.PG.Quantity	[30]Pseudomonas aeruginosa_S16.raw.PG.Quantity	[31] Pseudomonas aeruginosa_S10.raw.PG.Quantity	[32] Pseudomonas aeruginosa_S15.raw.PG.Quantity	[33] Pseudomonas aeruginosa_S08.raw.PG.Quantity	[34]Pseudomonas aeruginosa_S03.raw.PG.Quantity	[35]Pseudomonas aeruginosa_S17.raw.PG.Quantity	[36] Pseudomonas aeruginosa_S02.raw.PG.Quantity	[37] Pseudomonas aeruginosa_S09.raw.PG.Quantity	[38] Pseudomonas aeruginosa_S18.raw.PG.Quantity	[39] Pseudomonas aeruginosa_S07.raw.PG.Quantity
E1JGJ6;E1JGJ7	E1JGJ6;E1JGJ7	ccoQ1;ccoQ2	Cytochrome c oxidase, cbb3-type, CcoQ subunit;Cytochrome c oxidase, cbb3-type, CcoQ subunit	E1JGJ6;E1JGJ7	E1JGJ6_PSEAE;E1JGJ7_PSEAE	>tr|E1JGJ6|E1JGJ6_PSEAE Cytochrome c oxidase, cbb3-type, CcoQ subunit OS=Pseudomonas aeruginosa (strain ATCC 15692 / DSM 22644 / CIP 104116 / JCM 14847 / LMG 12228 / 1C / PRS 101 / PAO1) OX=208964 GN=ccoQ1 PE=4 SV=1;>tr|E1JGJ7|E1JGJ7_PSEAE Cytochrome c oxidase, cbb3-type, CcoQ subunit OS=Pseudomonas aeruginosa (strain ATCC 15692 / DSM 22644 / CIP 104116 / JCM 14847 / LMG 12228 / 1C / PRS 101 / PA…	6754.84;6782.89	159567	150813	152770	166935	125105	107329	32151.5	28876.7	56666.9	37784.4	51866.1	50690.9	39836.9	78292.1	81436.7	42676.7	80630.9	52981.5	81164.4	70713.2	49779	36635.1	78622.7	53250.9	94667.2	102234	26878.9	32546.1	37812.8	42679.9	53428	52825.8	25928.5	73501.2	27462	27995.6	47461.5	77299	57534.8
E1JGJ8	E1JGJ8	prfB	Peptide chain release factor 2	E1JGJ8	E1JGJ8_PSEAE	>tr|E1JGJ8|E1JGJ8_PSEAE Peptide chain release factor 2 OS=Pseudomonas aeruginosa (strain ATCC 15692 / DSM 22644 / CIP 104116 / JCM 14847 / LMG 12228 / 1C / PRS 101 / PAO1) OX=208964 GN=prfB PE=3 SV=1	41170.7	122116	121871	127311	124022	118364	120327	123474	121487	116765	123837	101341	115696	125679	138797	141305	182742	136395	120066	131783	106223	85273.9	123809	108161	135832	131642	137551	148530	161999	152130	185640	138348	159991	137894	149758	208718	149054	132589	141223	120713
G3XCT4	G3XCT4	PA3580	Cys-tRNA(Pro)/Cys-tRNA(Cys) deacylase	G3XCT4	G3XCT4_PSEAE	>tr|G3XCT4|G3XCT4_PSEAE Cys-tRNA(Pro)/Cys-tRNA(Cys) deacylase OS=Pseudomonas aeruginosa (strain ATCC 15692 / DSM 22644 / CIP 104116 / JCM 14847 / LMG 12228 / 1C / PRS 101 / PAO1) OX=208964 GN=PA3580 PE=3 SV=1	16493.1	54889.9	56271.5	54629.4	54643.6	51142.9	64013.1	47312.8	53734.1	56077.2	70146.5	43260.3	44226.7	72419.1	64854.3	63800.7	45794.9	60863.1	63844.2	62500.5	53004	50463.7	44397.2	44334.4	2472.52	66139.1	40393.3	146597	60265.5	46388.7	54953.7	50036.5	68241	35991.3	37880.9	38320.9	53480.6	40444.2	39870.4	50000.4
G3XCT5	G3XCT5	pilK	protein-glutamate O-methyltransferase	G3XCT5	G3XCT5_PSEAE	>tr|G3XCT5|G3XCT5_PSEAE protein-glutamate O-methyltransferase OS=Pseudomonas aeruginosa (strain ATCC 15692 / DSM 22644 / CIP 104116 / JCM 14847 / LMG 12228 / 1C / PRS 101 / PAO1) OX=208964 GN=pilK PE=4 SV=1	33340.1	28416.3	38768.9	39876.5	36906.5	39292.9	40741	11931.7	16445.3	6099.21	11960.1	13336.1	16250.6	8704.73	11303	36929.4	14085.8	4522.47	13730.9	14748.6	10384.5	17200.2	21320.5	20343.3	18100.5	16434.3	29137.6	19232.6	14536	13388.5	17126.3	30582.5	16665.1	16148.2	27260.6	5754.57	3633.89	16351.6	15165.8	9745.68
G3XCT6	G3XCT6	PA1458	histidine kinase	G3XCT6	G3XCT6_PSEAE	>tr|G3XCT6|G3XCT6_PSEAE histidine kinase OS=Pseudomonas aeruginosa (strain ATCC 15692 / DSM 22644 / CIP 104116 / JCM 14847 / LMG 12228 / 1C / PRS 101 / PAO1) OX=208964 GN=PA1458 PE=4 SV=1	79737.6	323135	332429	314016	324103	355795	318076	248202	209955	247293	215223	158913	286196	222079	250359	272564	153779	315071	183402	237393	193311	180472	249592	199633	201990	271779	229220	258271	164644	268760	243540	207889	256129	255506	180931	97736.9	161606	270151	303921	254784
G3XCT7	G3XCT7	ampG	AmpG	G3XCT7	G3XCT7_PSEAE	>tr|G3XCT7|G3XCT7_PSEAE AmpG OS=Pseudomonas aeruginosa (strain ATCC 15692 / DSM 22644 / CIP 104116 / JCM 14847 / LMG 12228 / 1C / PRS 101 / PAO1) OX=208964 GN=ampG PE=4 SV=1	64646.8	72101.9	52234.1	45452.9	49722.2	67290.5	61607.1	53056.5	45234.3	56212.1	42312.9	56088.3	61015.4	52119.4	56508	69879.6	36425.3	55310.1	29457.6	84586.5	43497.6	38016.8	46784.2	27832.6	37897.9	46352.9	31729.8	40349.6	40640.5	52022.1	48330	45577.1	37763.7	46604.9	49931	105284	35877.2	52812.3	43252.6	50006.8
G3XCT8	G3XCT8	PA1699	Type III secretion system effector delivery regulator TyeA domain-containing protein	G3XCT8	G3XCT8_PSEAE	>tr|G3XCT8|G3XCT8_PSEAE Type III secretion system effector delivery regulator TyeA domain-containing protein OS=Pseudomonas aeruginosa (strain ATCC 15692 / DSM 22644 / CIP 104116 / JCM 14847 / LMG 12228 / 1C / PRS 101 / PAO1) OX=208964 GN=PA1699 PE=4 SV=1	10441	14280.8	8526.49	4607.13	16482.2	11225.2	26246.2	10869.8	3404.79	1186.91	4166.56	224.851	12546.6	2883.95	5200.69	19900.4	1666.24	12208.6	11529.6	4175.08	24.9449	7079.57	2683.72	7519.35	349.689	3100.38	5929.15	7029.27	15639.4	11540.1	8110.15	9678.09	5800.57	1862.11	959.999	9178.2	34322.3	2265.33	3383	5695.46
G3XCU2	G3XCU2	argR	HTH-type transcriptional regulator ArgR	G3XCU2	ARGR_PSEAE	>sp|G3XCU2|ARGR_PSEAE HTH-type transcriptional regulator ArgR OS=Pseudomonas aeruginosa (strain ATCC 15692 / DSM 22644 / CIP 104116 / JCM 14847 / LMG 12228 / 1C / PRS 101 / PAO1) OX=208964 GN=argR PE=4 SV=1	36854.2	24620.5	26907.9	30077.4	27933.5	31013.3	31777.5	49066.1	44931.1	42378.1	32526.6	23822	40130.6	19293.7	31364.5	25983	38795.8	31486.5	40015.3	26973.6	23938	36970.1	42681.9	39704.6	34806.4	23931.1	32699.8	46499.4	31315.1	43385.1	28842.3	37874.4	32885.6	41341.3	28315.3	45182.9	50467.3	32501.3	39174.2	46602.6
G3XCU3	G3XCU3	wbpX	Glycosyltransferase WbpX	G3XCU3	G3XCU3_PSEAE	>tr|G3XCU3|G3XCU3_PSEAE Glycosyltransferase WbpX OS=Pseudomonas aeruginosa (strain ATCC 15692 / DSM 22644 / CIP 104116 / JCM 14847 / LMG 12228 / 1C / PRS 101 / PAO1) OX=208964 GN=wbpX PE=4 SV=1	52238.3	42923.8	59110	62973.7	61150.4	57844.5	51387.7	45207.7	44007.3	70412.2	42678.4	37901.3	56566.3	39207.2	54738.2	38405.2	41578	27800.7	23700.4	24574.3	11210.9	89415.7	53078.6	51622.9	47711.5	73242.2	62557.2	55153.8	33464.3	87885.4	70401.7	45262.2	57977.6	51195.2	31111.3	87659.5	28630.3	81051.1	23191	54030.6
G3XCU6	G3XCU6	cysB	Transcriptional regulator CysB	G3XCU6	G3XCU6_PSEAE	>tr|G3XCU6|G3XCU6_PSEAE Transcriptional regulator CysB OS=Pseudomonas aeruginosa (strain ATCC 15692 / DSM 22644 / CIP 104116 / JCM 14847 / LMG 12228 / 1C / PRS 101 / PAO1) OX=208964 GN=cysB PE=3 SV=1	36109.8	239657	400376	335424	365999	406508	431915	567953	693787	691928	487667	232220	633036	328924	372025	219162	237102	364574	1.00391e+06	223335	375910	756617	374765	416990	483457	348159	424285	463637	298712	782175	488427	342205	524082	603749	218515	464123	349032	630637	192057	587940
G3XCU7	G3XCU7	PA2949	Probable lipase	G3XCU7	G3XCU7_PSEAE	>tr|G3XCU7|G3XCU7_PSEAE Probable lipase OS=Pseudomonas aeruginosa (strain ATCC 15692 / DSM 22644 / CIP 104116 / JCM 14847 / LMG 12228 / 1C / PRS 101 / PAO1) OX=208964 GN=PA2949 PE=4 SV=1	34837.2	22740	26148.3	30260.8	30214.4	41489.4	48400.2	83997.9	72229.3	47257.5	61179.5	17376.5	49279.8	35427.4	54775.1	30385.4	17110.6	42590.2	1653.32	17104.9	16706.2	21579.1	45551.1	12731.2	46497.9	26124.1	25274.8	88248.8	16444	105740	105888	14741.7	59748.8	44909.1	6500.64	90761.9	61137	70574.4	26139.7	49844
G3XCU8	G3XCU8	PA0628	Phage late control D family protein	G3XCU8	G3XCU8_PSEAE	>tr|G3XCU8|G3XCU8_PSEAE Phage late control D family protein OS=Pseudomonas aeruginosa (strain ATCC 15692 / DSM 22644 / CIP 104116 / JCM 14847 / LMG 12228 / 1C / PRS 101 / PAO1) OX=208964 GN=PA0628 PE=1 SV=1	35870.7	5721.25	4660.32	4852.2	3352.41	5702.37	3590.37	5660.33	1073.97	7536.54	4488.46	5201.05	5584.44	2802.61	5312.66	9334.46	23480	32405.8	686.02	8253.94	1260.9	35986.9	10603.2	782.36	63406.1	2634.19	4343.58	9202.66	3058.49	665.831	6878.05	956.553	5360.3	6001.92	3630.09	828.78	15005.3	3784.98	5859.79	1304.49
G3XCU9	G3XCU9	PA2020	Probable transcriptional regulator	G3XCU9	G3XCU9_PSEAE	>tr|G3XCU9|G3XCU9_PSEAE Probable transcriptional regulator OS=Pseudomonas aeruginosa (strain ATCC 15692 / DSM 22644 / CIP 104116 / JCM 14847 / LMG 12228 / 1C / PRS 101 / PAO1) OX=208964 GN=PA2020 PE=4 SV=1	23727.2	61196.2	55592.5	51451.1	53726.9	53268.5	45757.6	34827	46925.9	53470.5	30949.2	33279.5	3701.07	152423	6771.72	10775	4267.74	28047.9	26560	21956.6	26460.5	6481.89	41374.2	41994.9	56140.7	63351.7	31108.4	29577.3	33180.3	47733.3	39056.1	44851.1	32697.6	40099.6	40627.5	26390.4	31056.1	43179.9	25180.1	37393.7
G3XCV0	G3XCV0	fleQ	Transcriptional regulator FleQ	G3XCV0	FLEQ_PSEAE	>sp|G3XCV0|FLEQ_PSEAE Transcriptional regulator FleQ OS=Pseudomonas aeruginosa (strain ATCC 15692 / DSM 22644 / CIP 104116 / JCM 14847 / LMG 12228 / 1C / PRS 101 / PAO1) OX=208964 GN=fleQ PE=1 SV=1	55277.1	488879	509026	461109	492119	532592	455512	468630	506977	591963	457499	349818	478192	382799	428662	298756	247342	536100	359287	281371	232848	323784	411173	358636	447114	255716	419401	399587	297248	484524	440579	351905	476107	439286	245724	245269	429252	466708	418606	496535
G3XCV2	G3XCV2	pchE	Pyochelin synthetase PchE	G3XCV2	PCHE_PSEAE	>sp|G3XCV2|PCHE_PSEAE Pyochelin synthetase PchE OS=Pseudomonas aeruginosa (strain ATCC 15692 / DSM 22644 / CIP 104116 / JCM 14847 / LMG 12228 / 1C / PRS 101 / PAO1) OX=208964 GN=pchE PE=1 SV=1	156422	949680	1.31291e+06	1.1048e+06	1281046	1.37558e+06	3.01882e+06	138359	26122.9	304753	109426	629989	223376	273493	262529	1.5289e+06	34438.4	537281	176499	891556	173356	323214	429497	952040	144290	1064515	1.51401e+06	45747.9	22765.7	507144	65655.7	2.0381e+06	150734	1.00947e+06	106220	58365.4	920130	327531	873409	1.11889e+06
G3XCV4;Q820A5	G3XCV4;Q820A5	phzG1;phzG2	Probable pyridoxamine 5'-phosphate oxidase	G3XCV4;Q820A5	G3XCV4_PSEAE;Q820A5_PSEAE	>tr|G3XCV4|G3XCV4_PSEAE Probable pyridoxamine 5'-phosphate oxidase OS=Pseudomonas aeruginosa (strain ATCC 15692 / DSM 22644 / CIP 104116 / JCM 14847 / LMG 12228 / 1C / PRS 101 / PAO1) OX=208964 GN=phzG1 PE=3 SV=1;>tr|Q820A5|Q820A5_PSEAE Probable pyridoxamine 5'-phosphate oxidase OS=Pseudomonas aeruginosa (strain ATCC 15692 / DSM 22644 / CIP 104116 / JCM 14847 / LMG 12228 / 1C / PRS 101 / PAO1) OX…	24268.24;24399.43	83369.8	107858	103330	100351	107237	338764	592953	137341	108944	108491	5557.36	66543.7	118809	66250.8	14333.7	14332.3	426581	4381.14	21819.5	116405	6402.3	13628.8	563299	564438	135465	444210	381508	252108	130278	314490	251535	148204	485690	8858.75	13451.1	291388	106235	274709	153720
G3XCV5	G3XCV5	phaC1	Poly(3-hydroxyalkanoic acid) synthase 1	G3XCV5	G3XCV5_PSEAE	>tr|G3XCV5|G3XCV5_PSEAE Poly(3-hydroxyalkanoic acid) synthase 1 OS=Pseudomonas aeruginosa (strain ATCC 15692 / DSM 22644 / CIP 104116 / JCM 14847 / LMG 12228 / 1C / PRS 101 / PAO1) OX=208964 GN=phaC1 PE=4 SV=1	62523.2	81324.1	89966.7	82643.5	86220.2	84296	95797.9	252115	316460	212735	253224	132990	245684	201148	195609	48523.8	37338.6	83203.9	119059	58439.1	248898	221745	129825	90398.1	117576	41559	69681.1	126246	71676.7	219188	145519	55241.2	150905	280288	24870.3	34617.7	102131	235669	45537.8	173844
G3XCV7	G3XCV7	pbpA	Peptidoglycan D,D-transpeptidase MrdA	G3XCV7	G3XCV7_PSEAE	>tr|G3XCV7|G3XCV7_PSEAE Peptidoglycan D,D-transpeptidase MrdA OS=Pseudomonas aeruginosa (strain ATCC 15692 / DSM 22644 / CIP 104116 / JCM 14847 / LMG 12228 / 1C / PRS 101 / PAO1) OX=208964 GN=pbpA PE=1 SV=1	72213.4	12483.5	14090.8	15974.7	12654.1	12751.8	17926.2	17959.9	12641.8	16657.5	18124.9	16884.1	19924.4	17773	21734.5	29244.6	23988.7	21012.8	12023.8	18870.7	9366.47	17001.1	19408.7	17254.4	22268.3	21551.8	16087.5	26011.3	24535	18360.3	23803.9	19515.7	24442.4	18700.5	20292.2	61567.1	20032.4	19057.5	21164.5	17155.2
G3XCV8	G3XCV8	PA2405	Secreted protein	G3XCV8	G3XCV8_PSEAE	>tr|G3XCV8|G3XCV8_PSEAE Secreted protein OS=Pseudomonas aeruginosa (strain ATCC 15692 / DSM 22644 / CIP 104116 / JCM 14847 / LMG 12228 / 1C / PRS 101 / PAO1) OX=208964 GN=PA2405 PE=4 SV=1	11425	103788	77731.9	56310.3	70751.3	108061	NaN	96117.5	188168	132293	124864	260241	135092	116758	149731	13616.5	159825	857.519	228530	161463	152737	143153	135726	109311	189033	52420.3	70372.3	193541	224744	130913	180521	106050	173939	63121.2	124418	1502.96	17666.1	134490	183712	7539.28
G3XCV9	G3XCV9	PA5514	Probable beta-lactamase	G3XCV9	G3XCV9_PSEAE	>tr|G3XCV9|G3XCV9_PSEAE Probable beta-lactamase OS=Pseudomonas aeruginosa (strain ATCC 15692 / DSM 22644 / CIP 104116 / JCM 14847 / LMG 12228 / 1C / PRS 101 / PAO1) OX=208964 GN=PA5514 PE=4 SV=1	29073.4	2225.76	2952.44	1682.2	1724.5	5469.11	6435.9	8173.64	17643.1	8923.19	14566.1	8712.19	12524.7	8841.42	8977.36	5762.48	8097.05	3488.85	30414.2	7410.51	2312.17	24997.9	9471.56	1086.87	10739.2	12922.2	698.798	8586.84	4985.63	11544.7	9961.33	6910.82	569.524	18985.6	3939.25	31497.2	5178.23	6473.38	3723.86	4778.48
G3XCW2	G3XCW2	PA2018	Efflux pump membrane transporter	G3XCW2	G3XCW2_PSEAE	>tr|G3XCW2|G3XCW2_PSEAE Efflux pump membrane transporter OS=Pseudomonas aeruginosa (strain ATCC 15692 / DSM 22644 / CIP 104116 / JCM 14847 / LMG 12228 / 1C / PRS 101 / PAO1) OX=208964 GN=PA2018 PE=3 SV=1	112698	10948.1	9789.5	9199.11	10474.9	10414.2	9895.29	7858.97	4895.18	6283.29	4313.28	7980.46	187843	102998	184345	337998	147216	7733.46	3334.29	22525	5108.83	145073	6722.08	16254.6	26350.2	60301.2	7215.5	3782.66	9829.72	6418.18	5836.72	6014.95	5225.29	5609.86	10597.8	182107	5037.13	9658.2	10250.3	8083.91
G3XCW5	G3XCW5	PA3031	Lipoprotein YgdI/YgdR-like SH3-like domain-containing protein	G3XCW5	G3XCW5_PSEAE	>tr|G3XCW5|G3XCW5_PSEAE Lipoprotein YgdI/YgdR-like SH3-like domain-containing protein OS=Pseudomonas aeruginosa (strain ATCC 15692 / DSM 22644 / CIP 104116 / JCM 14847 / LMG 12228 / 1C / PRS 101 / PAO1) OX=208964 GN=PA3031 PE=4 SV=1	8012.16	119490	54424.5	97106.7	68345.7	55151.8	81048.9	22631.7	43508.8	78323.8	127228	6409.82	297484	34714.5	198870	77084.5	44852.5	110287	356.977	12667.7	378.053	13731	69396.9	47225.2	22858	49065.9	52801.9	106041	17177.6	167521	111167	45655.9	101443	25735.3	26117.5	524033	58320.3	139809	58941.3	18418.3
G3XCW6	G3XCW6	dnr	Transcriptional regulator Dnr	G3XCW6	G3XCW6_PSEAE	>tr|G3XCW6|G3XCW6_PSEAE Transcriptional regulator Dnr OS=Pseudomonas aeruginosa (strain ATCC 15692 / DSM 22644 / CIP 104116 / JCM 14847 / LMG 12228 / 1C / PRS 101 / PAO1) OX=208964 GN=dnr PE=4 SV=1	25932.8	189700	183935	178117	193243	183266	171192	107958	118193	144958	128634	127171	108233	151239	112056	103894	102795	79707.2	90995.9	115214	102769	106751	114115	128592	108340	115680	97753.3	84741.4	91907	155772	119078	106770	122161	128563	84211.8	12287	45598.1	125330	102123	108472
G3XCW7	G3XCW7	PA1462	Probable plasmid partitioning protein	G3XCW7	G3XCW7_PSEAE	>tr|G3XCW7|G3XCW7_PSEAE Probable plasmid partitioning protein OS=Pseudomonas aeruginosa (strain ATCC 15692 / DSM 22644 / CIP 104116 / JCM 14847 / LMG 12228 / 1C / PRS 101 / PAO1) OX=208964 GN=PA1462 PE=4 SV=1	28407.7	52789.7	85620.6	83292.2	81617.8	87248.8	74249.9	88442.9	60217.1	78571.8	43301.9	24306.9	53663.2	28247.1	43926.9	47498.6	43353	21162.8	66857	39289.5	8325.92	40814.7	39605.4	54590.8	41566.8	55881.7	72953.8	73863.6	33695	68403.2	80443.1	57029.5	106867	72497.1	46790.2	12843.5	40877.1	67880.8	31884.2	57786.6
G3XCW8	G3XCW8	cioA	Cyanide insensitive terminal oxidase	G3XCW8	G3XCW8_PSEAE	>tr|G3XCW8|G3XCW8_PSEAE Cyanide insensitive terminal oxidase OS=Pseudomonas aeruginosa (strain ATCC 15692 / DSM 22644 / CIP 104116 / JCM 14847 / LMG 12228 / 1C / PRS 101 / PAO1) OX=208964 GN=cioA PE=3 SV=1	54235.1	31004.8	36042.2	37758.3	35622.6	36935	24692.5	47530.3	43480.4	70532.6	71632.1	37612.6	47872.8	39281.4	55599.5	5233.98	16068.7	92421.7	26738.8	39249.8	18648.5	65931.6	25972.4	39707.6	30499.1	16856	26982.7	27877.9	10989.8	28324.6	24791.4	20002.4	33080.9	27490.4	8197.05	26752.7	17341.5	26504.5	33088.4	43747.9
G3XCW9	G3XCW9	ampD	1,6-anhydro-N-acetylmuramyl-L-alanine amidase AmpD	G3XCW9	G3XCW9_PSEAE	>tr|G3XCW9|G3XCW9_PSEAE 1,6-anhydro-N-acetylmuramyl-L-alanine amidase AmpD OS=Pseudomonas aeruginosa (strain ATCC 15692 / DSM 22644 / CIP 104116 / JCM 14847 / LMG 12228 / 1C / PRS 101 / PAO1) OX=208964 GN=ampD PE=3 SV=1	21028.4	12674.3	12313.2	11084.9	10472.7	11847.4	3163.18	11198.3	10601	6564.48	13040.4	8899.51	11849.6	10272.6	13107.9	12482.6	13176.4	7269.79	10677.1	11973.9	10199.8	6616.52	10223.6	10735.7	10013.1	11679.1	6760.78	12566.2	5583	12918.3	9627.67	10607.9	17630.4	7352.01	5077.05	6971.21	10868.4	8598.54	11306.3	12781.3
G3XCX0	G3XCX0	PA3789	PepSY domain-containing protein	G3XCX0	G3XCX0_PSEAE	>tr|G3XCX0|G3XCX0_PSEAE PepSY domain-containing protein OS=Pseudomonas aeruginosa (strain ATCC 15692 / DSM 22644 / CIP 104116 / JCM 14847 / LMG 12228 / 1C / PRS 101 / PAO1) OX=208964 GN=PA3789 PE=4 SV=1	52232.8	44626	41598.1	39399.4	35459.3	39340.4	54109.1	77082.6	67662.6	61499.1	29802.8	29847.1	48851	37843.8	43498.3	86987.1	29264.5	38579.8	30355.2	91297.2	41493.1	77366.6	60784.4	37935.2	54100	54149.4	54013	64198.8	44274.1	64490.3	24314.4	108326	76587.4	51471.4	47158.5	43077.1	54852.2	33780.5	131772	60664.5
G3XCX1	G3XCX1	narG	nitrate reductase (quinone)	G3XCX1	G3XCX1_PSEAE	>tr|G3XCX1|G3XCX1_PSEAE nitrate reductase (quinone) OS=Pseudomonas aeruginosa (strain ATCC 15692 / DSM 22644 / CIP 104116 / JCM 14847 / LMG 12228 / 1C / PRS 101 / PAO1) OX=208964 GN=narG PE=3 SV=1	140973	154622	154192	154467	149671	145455	108510	43795.3	43057.1	69881.3	67668.8	42794.2	49697.4	55286	74018.6	74755.1	162369	122510	8250.25	19525.6	31392.7	25298.5	25713.7	85034.4	199212	46492.5	157164	74253.7	83567.7	26217.1	48814.7	69524.2	36024	17732.3	111819	38974.2	20121.1	34374.7	157610	45914.2
G3XCX3	G3XCX3	pilU	Type IV pilus ATPase PilU	G3XCX3	PILU_PSEAE	>sp|G3XCX3|PILU_PSEAE Type IV pilus ATPase PilU OS=Pseudomonas aeruginosa (strain ATCC 15692 / DSM 22644 / CIP 104116 / JCM 14847 / LMG 12228 / 1C / PRS 101 / PAO1) OX=208964 GN=pilU PE=1 SV=1	42532.8	168520	168048	168679	154723	166856	259851	109829	119715	72120.6	79102.2	95010.6	88999	63667.2	74987.2	297515	88310.3	54205.2	139497	144871	58161	146318	214897	148822	146090	101367	177807	166484	184331	104546	132213	199248	140013	110742	187100	33712.6	41317.2	125394	209174	63359.4
G3XCX5	G3XCX5	PA0618	Probable bacteriophage protein	G3XCX5	G3XCX5_PSEAE	>tr|G3XCX5|G3XCX5_PSEAE Probable bacteriophage protein OS=Pseudomonas aeruginosa (strain ATCC 15692 / DSM 22644 / CIP 104116 / JCM 14847 / LMG 12228 / 1C / PRS 101 / PAO1) OX=208964 GN=PA0618 PE=1 SV=1	31958.2	16616	20076.7	20788.8	19711.9	27591.8	10410.3	9291.68	8775.61	4430.59	4978.29	8066.18	7775.49	3385.11	14041	18253.6	64462.8	4024.57	10805.1	24457.1	1391.1	176300	14740.7	3024.27	246281	5057.4	20126.3	20581.1	1890.58	11948.6	11053.3	6498.37	3660.76	9460.24	5828.4	36034.2	35500.4	7440.81	12095.6	3310.94
G3XCX6	G3XCX6	popN	Type III secretion outer membrane protein PopN	G3XCX6	G3XCX6_PSEAE	>tr|G3XCX6|G3XCX6_PSEAE Type III secretion outer membrane protein PopN OS=Pseudomonas aeruginosa (strain ATCC 15692 / DSM 22644 / CIP 104116 / JCM 14847 / LMG 12228 / 1C / PRS 101 / PAO1) OX=208964 GN=popN PE=4 SV=1	31319.5	1199.81	1094.97	1065.48	1246.62	354.647	3137.22	9177.46	43.5299	1844.45	2886.16	4547.5	38403.6	8723.55	29516.8	9888.2	221015	1350.55	4172.81	954.945	947.393	3086.34	1805.4	NaN	37100.7	722.522	2128.13	4294.65	12329.5	955.247	3100.35	998.618	645.945	3020.53	1947.74	4538.08	799.288	3014.64	70523.2	1652.97
G3XCX7	G3XCX7	pilP	Type IV pilus inner membrane component PilP	G3XCX7	PILP_PSEAE	>sp|G3XCX7|PILP_PSEAE Type IV pilus inner membrane component PilP OS=Pseudomonas aeruginosa (strain ATCC 15692 / DSM 22644 / CIP 104116 / JCM 14847 / LMG 12228 / 1C / PRS 101 / PAO1) OX=208964 GN=pilP PE=1 SV=1	19053.8	170615	169728	165454	180686	169859	305995	113733	104822	62574.8	75408.7	74051.6	92712.9	72779.7	80763.8	420583	90088.4	35966.5	121365	5805.87	60250.2	162164	267322	176439	149164	5439.91	181830	158320	207415	118906	152540	214625	165822	116462	185402	7085.13	41883.3	145978	227275	58120.6
G3XCX8	G3XCX8	PA0900	Topoisomerase II	G3XCX8	G3XCX8_PSEAE	>tr|G3XCX8|G3XCX8_PSEAE Topoisomerase II OS=Pseudomonas aeruginosa (strain ATCC 15692 / DSM 22644 / CIP 104116 / JCM 14847 / LMG 12228 / 1C / PRS 101 / PAO1) OX=208964 GN=PA0900 PE=4 SV=1	10640.7	NaN	22332.9	15785.7	19209.1	20024	50254.1	72519.6	84995.1	85485.3	41778.9	40.1997	35634.6	14190.8	20598.5	6054.69	18641.6	2798.77	64177.6	9050.54	1.06205	33629.7	4849.23	39683.1	60049	23986.7	36162.5	66897.4	14080.2	95038.9	45799.8	48461.8	99694	68523.9	36118.6	126891	57941.8	45752.8	3405.65	28664.9
G3XCX9	G3XCX9	PA0598	J domain-containing protein	G3XCX9	G3XCX9_PSEAE	>tr|G3XCX9|G3XCX9_PSEAE J domain-containing protein OS=Pseudomonas aeruginosa (strain ATCC 15692 / DSM 22644 / CIP 104116 / JCM 14847 / LMG 12228 / 1C / PRS 101 / PAO1) OX=208964 GN=PA0598 PE=4 SV=1	28012.6	19567.1	31293.5	33860.8	34829.2	29700.2	17656.6	20455.5	17263.2	22195.5	21108.1	27680	30257.8	10470.1	27653	14651.3	29354.8	18536.1	6836.81	29870.4	19788.2	20748.9	21787.4	26868.9	31124.2	30193.3	16811.1	26432.1	16678.9	30337.1	16563.8	23775.6	20129.4	13343.3	31650.9	47704.4	7286.94	21277.8	15263.4	24864.9
G3XCY0	G3XCY0	PA0979	Transposase	G3XCY0	G3XCY0_PSEAE	>tr|G3XCY0|G3XCY0_PSEAE Transposase OS=Pseudomonas aeruginosa (strain ATCC 15692 / DSM 22644 / CIP 104116 / JCM 14847 / LMG 12228 / 1C / PRS 101 / PAO1) OX=208964 GN=PA0979 PE=3 SV=1	11708.5	26205	22197.3	20873.1	21176.3	23625.2	331.184	5526.05	35543	17640.3	18337.1	23064.4	21774.6	22586.6	22693.8	26560.2	36043	18430.8	37452.4	40491.3	241.388	18412.6	17959.7	8889.3	21948.6	11173.7	18684.4	74743.6	3245.42	64517.8	11223.3	17650.9	10800.7	15909.8	5042.51	3853.06	380.199	33580	8051.37	7582.32
G3XCY2	G3XCY2	wzz	O-antigen chain length regulator	G3XCY2	G3XCY2_PSEAE	>tr|G3XCY2|G3XCY2_PSEAE O-antigen chain length regulator OS=Pseudomonas aeruginosa (strain ATCC 15692 / DSM 22644 / CIP 104116 / JCM 14847 / LMG 12228 / 1C / PRS 101 / PAO1) OX=208964 GN=wzz PE=4 SV=1	39262.2	60292.7	68806.1	61223.3	67031.1	72636.5	54629.6	61144.6	72439.6	51075.2	70714.2	42695.7	55816.6	60373	59199.2	52025	74295.7	80626.3	80857.6	55492.6	61686.1	99887.8	65587.3	58647.8	70382.2	61414	74086.3	64977.6	64752	54345.6	56611.8	72620.1	88283	72863	51496	61049.7	65629.4	78719.1	57202.8	54677.6
G3XCY3	G3XCY3	PA1463	CheW-like domain-containing protein	G3XCY3	G3XCY3_PSEAE	>tr|G3XCY3|G3XCY3_PSEAE CheW-like domain-containing protein OS=Pseudomonas aeruginosa (strain ATCC 15692 / DSM 22644 / CIP 104116 / JCM 14847 / LMG 12228 / 1C / PRS 101 / PAO1) OX=208964 GN=PA1463 PE=4 SV=1	32290	42650.2	42683.9	33974.3	38546	43769.9	35903.7	56169.5	44936.4	50537.8	38726.4	43823.2	28127.2	38896.8	47175.1	30372.2	37274	26140.1	67503.4	32217.6	106361	52970.2	37389.1	61438.1	25288.9	51770.9	56054.9	63904.5	48644.1	25107.3	49067.6	43269.8	67734.6	65932.5	36774.9	13658	31080.9	75823	53773.7	70462.5
G3XCY4	G3XCY4	amrZ	Transcription factor AmrZ	G3XCY4	AMRZ_PSEAE	>sp|G3XCY4|AMRZ_PSEAE Transcription factor AmrZ OS=Pseudomonas aeruginosa (strain ATCC 15692 / DSM 22644 / CIP 104116 / JCM 14847 / LMG 12228 / 1C / PRS 101 / PAO1) OX=208964 GN=amrZ PE=1 SV=1	12333	243706	234416	201232	232010	196005	236216	355356	421085	315022	479503	343629	403138	447561	383431	301100	494710	310647	271154	277495	331066	397298	424762	334307	345453	762114	230864	463006	447358	586257	418163	308518	579040	622746	310730	3.45764e+06	461652	644517	8053.16	484261
G3XCY5	G3XCY5	pvdN	PvdN	G3XCY5	G3XCY5_PSEAE	>tr|G3XCY5|G3XCY5_PSEAE PvdN OS=Pseudomonas aeruginosa (strain ATCC 15692 / DSM 22644 / CIP 104116 / JCM 14847 / LMG 12228 / 1C / PRS 101 / PAO1) OX=208964 GN=pvdN PE=1 SV=1	47981.6	28706.6	37742.7	32867.9	40756.1	38605.7	11224.7	37447	28045.3	27207.1	25685.2	26580	63909.8	34581.8	52789.3	22417	44978.5	9541.37	54278.1	48611.9	18538.7	39061.7	38169	77443.2	41890.7	6733.84	53955.3	34580.2	21256.4	32866.9	31093.3	31595.8	32071.3	17309.9	112703	19583.3	9124.05	32519.3	62396.8	27217.3
G3XCY6	G3XCY6	gltR	Transcriptional regulatory protein GltR	G3XCY6	GLTR_PSEAE	>sp|G3XCY6|GLTR_PSEAE Transcriptional regulatory protein GltR OS=Pseudomonas aeruginosa (strain ATCC 15692 / DSM 22644 / CIP 104116 / JCM 14847 / LMG 12228 / 1C / PRS 101 / PAO1) OX=208964 GN=gltR PE=1 SV=1	27413.4	53054.6	34329.6	41267.1	38854.4	36233.6	42530.3	28316.1	30016.4	32514.4	29129.5	35798.2	29448.7	28175.3	38719.4	71507.2	8807.32	24983.8	12345.9	25092.2	38877.7	15507	39122.7	33084.8	15388.8	12139.6	22789.6	48270.6	10132.5	39067.9	37121.6	28413.9	36142.9	32689.2	11653	8830.82	39299.5	32928.7	13279.3	26801.8
G3XCY8	G3XCY8	piuA	Probable TonB-dependent siderophore receptor PiuA	G3XCY8	PIUA_PSEAE	>sp|G3XCY8|PIUA_PSEAE Probable TonB-dependent siderophore receptor PiuA OS=Pseudomonas aeruginosa (strain ATCC 15692 / DSM 22644 / CIP 104116 / JCM 14847 / LMG 12228 / 1C / PRS 101 / PAO1) OX=208964 GN=piuA PE=1 SV=1	82336.6	150822	145400	140578	147497	154570	11477.8	122825	10694.6	62876	27804.1	21692.5	22659.4	19875.7	18520.9	24356.3	14021.8	130636	8419.91	263139	28220.7	20908.1	52807.1	15271	19997.9	16258.6	149485	23409.3	98852	102775	27138.7	14096.5	16997.4	277296	117504	1.67176e+06	309038	14133.6	107883	15794
G3XCY9	G3XCY9	narJ	Respiratory nitrate reductase delta chain	G3XCY9	G3XCY9_PSEAE	>tr|G3XCY9|G3XCY9_PSEAE Respiratory nitrate reductase delta chain OS=Pseudomonas aeruginosa (strain ATCC 15692 / DSM 22644 / CIP 104116 / JCM 14847 / LMG 12228 / 1C / PRS 101 / PAO1) OX=208964 GN=narJ PE=4 SV=1	27261.8	10765.6	15664.2	13014	14515.5	13598.6	10657.8	784.886	3066.78	2205.94	4227.3	2979.64	4488.82	3872.07	3872.96	9818.94	10915	1468.7	307.082	962.271	1357.11	1492.11	2952.41	12092.3	19893.3	4130.63	13905	5147.74	2498.25	1990.75	4612.38	11167.1	610.413	722.601	6546.43	1301.11	96.7526	2570.76	14597.1	2293.27
G3XCZ0	G3XCZ0	fimU	Type II secretion system protein H	G3XCZ0	G3XCZ0_PSEAE	>tr|G3XCZ0|G3XCZ0_PSEAE Type II secretion system protein H OS=Pseudomonas aeruginosa (strain ATCC 15692 / DSM 22644 / CIP 104116 / JCM 14847 / LMG 12228 / 1C / PRS 101 / PAO1) OX=208964 GN=fimU PE=1 SV=1	18139.8	93278	81478.1	71988	96171.5	77385	155020	49620.5	64801.8	32942.9	59583.6	27142.7	56966.9	50417	57356.8	198826	53491.9	53259.5	87439.9	60452.5	26400.8	90789.8	82182.6	89195.4	77069.6	62293.5	128122	85719.7	90472	72342.8	80859.2	10206.5	81653.2	48306.7	9174.87	39692.8	42802.8	86273.5	135893	15817.5
G3XCZ2	G3XCZ2	algZ	Alginate biosynthesis protein AlgZ/FimS	G3XCZ2	G3XCZ2_PSEAE	>tr|G3XCZ2|G3XCZ2_PSEAE Alginate biosynthesis protein AlgZ/FimS OS=Pseudomonas aeruginosa (strain ATCC 15692 / DSM 22644 / CIP 104116 / JCM 14847 / LMG 12228 / 1C / PRS 101 / PAO1) OX=208964 GN=algZ PE=4 SV=1	40111.9	7459.42	12836.8	11125.2	12328.9	11936.5	23111.3	13638.6	16120	9759.04	13302.7	10872	13786.6	7238.5	10631.3	20825.7	11288.2	9485.49	18296.1	21437.2	10778.6	9377.08	12196.2	16853.6	18563.1	1256.16	13154.6	14618.7	12432.4	17464.5	16236.8	15941.5	14008.4	22351.7	20099.2	14738.2	9029.88	12034.9	8417.73	13060.1
G3XCZ3	G3XCZ3	pilZ	Type 4 fimbrial biogenesis protein PilZ	G3XCZ3	G3XCZ3_PSEAE	>tr|G3XCZ3|G3XCZ3_PSEAE Type 4 fimbrial biogenesis protein PilZ OS=Pseudomonas aeruginosa (strain ATCC 15692 / DSM 22644 / CIP 104116 / JCM 14847 / LMG 12228 / 1C / PRS 101 / PAO1) OX=208964 GN=pilZ PE=4 SV=1	12904	82044.4	109781	94409.5	80335.2	102013	135449	89335.1	90233.2	65907.5	93732.4	67591	81957.8	85968.6	79833	209370	86530.2	71848.2	107965	115991	78359.9	74723	93090.7	131097	101130	93055.2	105872	144443	106349	116905	115981	134763	114539	111568	155404	76888.3	97906.9	123427	142010	78343.4
G3XCZ4	G3XCZ4	PA0891	Peptidase M14	G3XCZ4	G3XCZ4_PSEAE	>tr|G3XCZ4|G3XCZ4_PSEAE Peptidase M14 OS=Pseudomonas aeruginosa (strain ATCC 15692 / DSM 22644 / CIP 104116 / JCM 14847 / LMG 12228 / 1C / PRS 101 / PAO1) OX=208964 GN=PA0891 PE=4 SV=1	40213.9	47569.1	46083.4	34803.3	52604.5	48868.6	97064.1	116870	111653	118647	94347.3	44416.3	94775	75418.2	87574.4	63642.6	71022.2	57289.7	47546.4	24857.7	37224.2	62789.6	63503.5	98084.9	68203.8	36047.2	74099.5	104733	43149.8	133418	82056.7	79195.4	74037.9	101484	63194.4	100576	94251.3	79020.5	65198.4	79709.8
G3XCZ5	G3XCZ5	aotM	Histidine/lysine/arginine/ornithine transport system permease protein HisM	G3XCZ5	G3XCZ5_PSEAE	>tr|G3XCZ5|G3XCZ5_PSEAE Histidine/lysine/arginine/ornithine transport system permease protein HisM OS=Pseudomonas aeruginosa (strain ATCC 15692 / DSM 22644 / CIP 104116 / JCM 14847 / LMG 12228 / 1C / PRS 101 / PAO1) OX=208964 GN=aotM PE=3 SV=1	26146.2	29024.5	20687.8	26064	24823.5	22264.8	25407.4	23461.4	16033.6	30141	16765.8	16068.8	20400.1	18790.9	17496.2	18928.6	12604.7	9464.59	10685.6	12703.8	8590.88	12484.5	4439.54	18309.5	17789.4	11815.5	18245.8	16475.3	13739.8	13596.3	15960.9	16259.5	11230.6	15631	17884.8	28564.3	22354.9	17835.5	17611.7	7159.48
G3XCZ6	G3XCZ6	fabD	Malonyl CoA-acyl carrier protein transacylase	G3XCZ6	G3XCZ6_PSEAE	>tr|G3XCZ6|G3XCZ6_PSEAE Malonyl CoA-acyl carrier protein transacylase OS=Pseudomonas aeruginosa (strain ATCC 15692 / DSM 22644 / CIP 104116 / JCM 14847 / LMG 12228 / 1C / PRS 101 / PAO1) OX=208964 GN=fabD PE=3 SV=1	32444.2	252858	341746	338652	316834	413214	315574	473586	615824	699100	612412	303736	537629	489523	554374	472502	895892	356712	510267	189314	92017	404890	304678	416672	477528	408097	361558	797569	442135	765483	1.01567e+06	726841	813840	553619	778305	918741	564376	561706	282303	547755
G3XCZ7	G3XCZ7	PA3119	Methyltransferase type 11 domain-containing protein	G3XCZ7	G3XCZ7_PSEAE	>tr|G3XCZ7|G3XCZ7_PSEAE Methyltransferase type 11 domain-containing protein OS=Pseudomonas aeruginosa (strain ATCC 15692 / DSM 22644 / CIP 104116 / JCM 14847 / LMG 12228 / 1C / PRS 101 / PAO1) OX=208964 GN=PA3119 PE=4 SV=1	21188	12979.1	9212.14	9635.79	13067.8	15296.8	9462.3	3290.95	13843.9	11322.8	14869.8	9149.06	2620.34	9931.54	12583.4	6469.64	2783.58	20466.7	10704.7	12796.3	9387.93	11773	26501.8	11059.1	13333.8	20115.8	10826.1	10295.8	6380.02	5298.4	4938.48	12713.9	11572.3	15331.2	7922.18	13945.2	12488.3	15371.6	10150.1	7646.42
G3XCZ8	G3XCZ8	pigA	Heme oxygenase PigA	G3XCZ8	PIGA_PSEAE	>sp|G3XCZ8|PIGA_PSEAE Heme oxygenase PigA OS=Pseudomonas aeruginosa (strain ATCC 15692 / DSM 22644 / CIP 104116 / JCM 14847 / LMG 12228 / 1C / PRS 101 / PAO1) OX=208964 GN=pigA PE=1 SV=1	21953.5	31406.9	37556.5	33680.4	34594.8	35583.7	86309.2	4304.09	21658.7	9048.41	13446.6	25118.7	21960.2	20856.7	35162	261738	130681	3928.91	5518.71	49879.1	6095.7	4479.85	10941.7	51519.3	44849.6	11218	52038.8	19785.8	36488.5	29164.8	23911.2	108624	6925.41	7833.24	122080	50982.7	13383.8	7468.46	51627.8	94853
G3XCZ9	G3XCZ9	phaC2	Poly(3-hydroxyalkanoic acid) synthase 2	G3XCZ9	G3XCZ9_PSEAE	>tr|G3XCZ9|G3XCZ9_PSEAE Poly(3-hydroxyalkanoic acid) synthase 2 OS=Pseudomonas aeruginosa (strain ATCC 15692 / DSM 22644 / CIP 104116 / JCM 14847 / LMG 12228 / 1C / PRS 101 / PAO1) OX=208964 GN=phaC2 PE=4 SV=1	62738.4	12313	11625.7	12196.9	12093.9	10833.6	18622.6	248095	555438	275822	309223	45534.2	205127	92006.2	216294	9648.72	13353.5	33952.6	58413.5	9988.24	219005	94946.7	41565.1	47450	86782.1	15504.8	35913.8	76876.4	41580.1	272532	140340	13543.6	154992	215791	10476	17444.3	23264.6	190367	13820.5	265989
G3XD02	G3XD02	pstC	Membrane protein component of ABC phosphate transporter	G3XD02	G3XD02_PSEAE	>tr|G3XD02|G3XD02_PSEAE Membrane protein component of ABC phosphate transporter OS=Pseudomonas aeruginosa (strain ATCC 15692 / DSM 22644 / CIP 104116 / JCM 14847 / LMG 12228 / 1C / PRS 101 / PAO1) OX=208964 GN=pstC PE=3 SV=1	73847.8	101959	91483.3	94255.5	90058	97535.9	138124	78293	31729.3	66319.9	68425	109612	115330	111358	132152	243020	22143.6	29397.6	99280	252418	85756	101705	93178.5	20877	37007.1	33708	29260.7	20736.6	25237.4	36935.2	37133	30080.3	16967.2	51689.9	35927.2	41052.5	34221.7	45600.7	32146.9	34024
G3XD03	G3XD03	PA1688	Uncharacterized protein	G3XD03	G3XD03_PSEAE	>tr|G3XD03|G3XD03_PSEAE Uncharacterized protein OS=Pseudomonas aeruginosa (strain ATCC 15692 / DSM 22644 / CIP 104116 / JCM 14847 / LMG 12228 / 1C / PRS 101 / PAO1) OX=208964 GN=PA1688 PE=4 SV=1	31750.1	7011.28	7430.5	9444.15	6083.63	6994.97	10432.2	31870.5	43289.2	22500.7	22642	15636.5	17394	20692.1	31964.6	11989.5	31584.1	14364.9	10657.2	12169.6	28790.2	15442.1	15600.8	15913.6	32787.1	13499.8	13799.2	34139.6	44401.3	35229.2	35838.4	11329.8	35223.4	50057.2	11744.1	19589	43742.9	46159.2	11803.1	60271.5
G3XD04	G3XD04	uvrD	DNA 3'-5' helicase	G3XD04	G3XD04_PSEAE	>tr|G3XD04|G3XD04_PSEAE DNA 3'-5' helicase OS=Pseudomonas aeruginosa (strain ATCC 15692 / DSM 22644 / CIP 104116 / JCM 14847 / LMG 12228 / 1C / PRS 101 / PAO1) OX=208964 GN=uvrD PE=3 SV=1	81494.4	193132	200391	188510	189318	187379	164790	110593	89102.6	100519	94716.9	109941	94401.4	85758.7	94399.8	130382	140406	114222	89535.9	133048	73809.9	77193.1	100328	105157	107465	155410	143779	109616	118305	97001.9	100757	134407	112214	99314.6	119025	310852	157583	86661.5	135566	98457.4
G3XD05	G3XD05	cioB	Cyanide insensitive terminal oxidase	G3XD05	G3XD05_PSEAE	>tr|G3XD05|G3XD05_PSEAE Cyanide insensitive terminal oxidase OS=Pseudomonas aeruginosa (strain ATCC 15692 / DSM 22644 / CIP 104116 / JCM 14847 / LMG 12228 / 1C / PRS 101 / PAO1) OX=208964 GN=cioB PE=3 SV=1	37012.2	9928.68	12247.9	10806.8	8937.28	16305.3	6821.54	18633.5	19187.9	42618.2	19073.5	6998.62	3767.14	16546.3	2704.79	5956.38	8824.02	10683.7	15090.4	7346.49	4877.98	14681.1	8243.03	15497.1	13872.4	9759.49	8189.79	20103.6	10967.1	17781.6	21831.9	16774.5	16053.1	17814.8	6544.35	7220.51	9364.26	15182.5	9608.16	16680.3
G3XD06	G3XD06	PA0630	Uncharacterized protein	G3XD06	G3XD06_PSEAE	>tr|G3XD06|G3XD06_PSEAE Uncharacterized protein OS=Pseudomonas aeruginosa (strain ATCC 15692 / DSM 22644 / CIP 104116 / JCM 14847 / LMG 12228 / 1C / PRS 101 / PAO1) OX=208964 GN=PA0630 PE=4 SV=1	12598.4	618.632	230.608	NaN	1124.22	NaN	1196	1940.08	11251.2	NaN	736.768	1042.33	472.471	490.103	1868.15	7234.72	7869.67	255.682	4826.06	3244.67	NaN	26195.1	3032.99	1616.63	30633.8	580.092	132.044	8975.16	4717.45	1173.66	NaN	4471.82	NaN	574.248	6510.19	4252.8	3684.16	399.076	194.944	442.172
G3XD07	G3XD07	PA1018	3-alpha,7-alpha, 12-alpha-trihydroxy-5-beta-cholest-24-enoyl-CoA hydratase	G3XD07	G3XD07_PSEAE	>tr|G3XD07|G3XD07_PSEAE 3-alpha,7-alpha, 12-alpha-trihydroxy-5-beta-cholest-24-enoyl-CoA hydratase OS=Pseudomonas aeruginosa (strain ATCC 15692 / DSM 22644 / CIP 104116 / JCM 14847 / LMG 12228 / 1C / PRS 101 / PAO1) OX=208964 GN=PA1018 PE=4 SV=1	31632	1532.17	4293	3383.84	2932.15	4469.95	1280.78	5602.16	3767.62	141.396	3548.46	1208.88	4053.97	1253.97	1435.27	1750.49	1101.07	1450.87	9156.63	1049.9	1693.77	8460.27	3038.3	6591.56	1847.36	9310.79	2254.88	2917.4	1049.82	8209.94	6291.03	2662.07	3723.81	5401.14	1860.79	2420.37	2227.19	2730.98	1426.18	4573.21
G3XD09	G3XD09	gltD	Glutamate synthase small chain	G3XD09	G3XD09_PSEAE	>tr|G3XD09|G3XD09_PSEAE Glutamate synthase small chain OS=Pseudomonas aeruginosa (strain ATCC 15692 / DSM 22644 / CIP 104116 / JCM 14847 / LMG 12228 / 1C / PRS 101 / PAO1) OX=208964 GN=gltD PE=4 SV=1	52625.1	83465.5	79357.2	84552.1	81915.7	94370.5	56570.7	62061.5	67179.2	81730.8	73604	51029.7	64120.2	62275.2	66368.1	119294	63801.5	100967	37220	100807	50787.3	27629.1	57622.7	53201.6	39000.7	73653.8	57757.9	79811.5	81346.7	78072.4	91924.3	69025.4	78637.6	61088.2	69508.1	129925	85995	85773.4	62691.2	61627.1
G3XD10	G3XD10	nirJ	Heme d1 biosynthesis protein NirJ	G3XD10	G3XD10_PSEAE	>tr|G3XD10|G3XD10_PSEAE Heme d1 biosynthesis protein NirJ OS=Pseudomonas aeruginosa (strain ATCC 15692 / DSM 22644 / CIP 104116 / JCM 14847 / LMG 12228 / 1C / PRS 101 / PAO1) OX=208964 GN=nirJ PE=4 SV=1	43952.7	16920.2	18310.2	20125.7	20650.2	28525.6	29604.6	14727.5	9279.62	5860.02	11164.9	9416.45	11115.7	3844.39	11117.8	30470.8	36807.8	4152.65	15799.7	12981.8	3789.65	3559.87	15730.4	14244.2	1079.28	17723.1	16374.4	13401.9	15862.2	8308.87	3943.47	21692	13071	5478.55	23548.8	4147.46	5663.48	9857.24	18017	14158.1
G3XD11	G3XD11	oprH	PhoP/Q and low Mg2+ inducible outer membrane protein H1	G3XD11	G3XD11_PSEAE	>tr|G3XD11|G3XD11_PSEAE PhoP/Q and low Mg2+ inducible outer membrane protein H1 OS=Pseudomonas aeruginosa (strain ATCC 15692 / DSM 22644 / CIP 104116 / JCM 14847 / LMG 12228 / 1C / PRS 101 / PAO1) OX=208964 GN=oprH PE=4 SV=1	21574	256041	258192	255711	241489	198457	178102	92613.8	110284	117378	153794	101267	141286	172691	167207	135756	148178	118145	154096	131898	224559	387925	123217	138891	315673	273541	278718	102423	117812	124337	59238.8	109641	85828.9	103936	117300	3.3943e+06	67495.1	168745	237198	132444
G3XD12	G3XD12	hcnC	Hydrogen cyanide synthase subunit HcnC	G3XD12	HCNC_PSEAE	>sp|G3XD12|HCNC_PSEAE Hydrogen cyanide synthase subunit HcnC OS=Pseudomonas aeruginosa (strain ATCC 15692 / DSM 22644 / CIP 104116 / JCM 14847 / LMG 12228 / 1C / PRS 101 / PAO1) OX=208964 GN=hcnC PE=1 SV=1	45281.7	237372	270372	221440	248230	259914	445748	360640	270294	461825	307104	24711.7	234298	186729	329557	6522.72	161081	237709	7431.36	17399.1	186073	7732	26519.2	551074	651490	84558.9	387893	514287	467338	402002	455437	245120	258616	331704	3359.25	7271.69	210818	333482	249646	410627
G3XD13	G3XD13	PA0902	Aromatic amino acid beta-eliminating lyase/threonine aldolase domain-containing protein	G3XD13	G3XD13_PSEAE	>tr|G3XD13|G3XD13_PSEAE Aromatic amino acid beta-eliminating lyase/threonine aldolase domain-containing protein OS=Pseudomonas aeruginosa (strain ATCC 15692 / DSM 22644 / CIP 104116 / JCM 14847 / LMG 12228 / 1C / PRS 101 / PAO1) OX=208964 GN=PA0902 PE=3 SV=1	35462.5	116525	127804	129795	128167	131635	72549.6	105382	123397	123928	115780	105060	111854	140942	114464	103548	110556	139407	144870	112723	79289.6	134659	132682	99356.5	108904	114912	109463	107858	92451	128465	111527	121593	126331	117327	99007.5	148752	118225	125762	116196	140038
G3XD14	G3XD14	dksA	RNA polymerase-binding transcription factor DksA	G3XD14	G3XD14_PSEAE	>tr|G3XD14|G3XD14_PSEAE RNA polymerase-binding transcription factor DksA OS=Pseudomonas aeruginosa (strain ATCC 15692 / DSM 22644 / CIP 104116 / JCM 14847 / LMG 12228 / 1C / PRS 101 / PAO1) OX=208964 GN=dksA PE=3 SV=1	17344.5	602753	567290	531430	517036	594073	736902	1.22027e+06	1.38447e+06	933476	1.37077e+06	955333	1.17471e+06	1.14401e+06	1.15929e+06	1.04725e+06	1.24191e+06	750102	740344	763356	1.03661e+06	677208	825162	931396	1.43096e+06	682450	762383	1.17998e+06	1.2267e+06	1378087	1.37584e+06	1.08021e+06	1.07667e+06	917484	981822	1.04552e+06	1.08956e+06	1.22735e+06	906753	1.18878e+06
G3XD15	G3XD15	pilW	Type 4 fimbrial biogenesis protein PilW	G3XD15	G3XD15_PSEAE	>tr|G3XD15|G3XD15_PSEAE Type 4 fimbrial biogenesis protein PilW OS=Pseudomonas aeruginosa (strain ATCC 15692 / DSM 22644 / CIP 104116 / JCM 14847 / LMG 12228 / 1C / PRS 101 / PAO1) OX=208964 GN=pilW PE=4 SV=1	30078.1	106803	99856.2	103638	115256	100642	107877	72663.6	40705.9	26637.7	44738.7	22671.3	33984.5	27778.2	33072.6	119766	41597.2	31088.7	62029.7	63151.1	24621.6	107204	54113.7	78341.3	71615	46715.7	100641	77036.2	56924.6	48496.5	67618.8	17155.1	68481.1	57756.4	5734.28	39990.6	30100.7	58173.4	118408	16812.5
G3XD16	G3XD16	PA2523	Probable two-component response regulator	G3XD16	G3XD16_PSEAE	>tr|G3XD16|G3XD16_PSEAE Probable two-component response regulator OS=Pseudomonas aeruginosa (strain ATCC 15692 / DSM 22644 / CIP 104116 / JCM 14847 / LMG 12228 / 1C / PRS 101 / PAO1) OX=208964 GN=PA2523 PE=4 SV=1	25787.9	25638	21251.4	20930.1	20344.7	19950.5	24138.4	9626.51	8874.06	15731.8	10149.5	6227.72	14534	12580.2	13182.2	18970.4	15667.9	10607	401107	21317.6	10245	9956.89	12000	17449.2	17524.3	25770.9	11221.6	20391.2	14731.2	15381.5	9265.11	18938.8	8107.59	12156.9	11590.4	12349.8	17050.7	11255.5	26922.7	7136.7
G3XD17	G3XD17	dsbC	Thiol:disulfide interchange protein	G3XD17	G3XD17_PSEAE	>tr|G3XD17|G3XD17_PSEAE Thiol:disulfide interchange protein OS=Pseudomonas aeruginosa (strain ATCC 15692 / DSM 22644 / CIP 104116 / JCM 14847 / LMG 12228 / 1C / PRS 101 / PAO1) OX=208964 GN=dsbC PE=3 SV=1	26095.2	40496.2	38943.8	41116.1	42733.8	48885.6	55272.9	79044.8	77191.7	62815.7	68359.7	71591.8	66706.9	84764	69343.3	80643.3	108107	40010.2	88606.9	70110.3	84848.9	92150.3	96456.6	60298	103881	78725.1	61190.7	87553.8	92744.9	77813.2	78988.6	82373.1	76033.4	88249.5	75953.4	110515	60076.2	77131.2	70768	82695.8
G3XD18	G3XD18	narI	Respiratory nitrate reductase gamma chain	G3XD18	G3XD18_PSEAE	>tr|G3XD18|G3XD18_PSEAE Respiratory nitrate reductase gamma chain OS=Pseudomonas aeruginosa (strain ATCC 15692 / DSM 22644 / CIP 104116 / JCM 14847 / LMG 12228 / 1C / PRS 101 / PAO1) OX=208964 GN=narI PE=4 SV=1	25007.9	2617	9315.33	6533.98	8140.18	7392.44	8745.36	4202.65	3198.08	4698.65	1487.29	585.695	3876.95	1258.22	2341.48	453.775	3471.48	1351.62	1.79495	951.898	1.71407	37.3893	1074.72	12916.9	10671.4	5247.31	7398.84	4786.88	11246.8	2385.43	4504.34	4099.39	1476.64	838.822	5468.69	4883.97	273.849	354.052	11068.3	584.256
G3XD20	G3XD20	mucD	Probable periplasmic serine endoprotease DegP-like	G3XD20	G3XD20_PSEAE	>tr|G3XD20|G3XD20_PSEAE Probable periplasmic serine endoprotease DegP-like OS=Pseudomonas aeruginosa (strain ATCC 15692 / DSM 22644 / CIP 104116 / JCM 14847 / LMG 12228 / 1C / PRS 101 / PAO1) OX=208964 GN=mucD PE=3 SV=1	50321.7	982720	1.04069e+06	974815	1.02488e+06	972736	859414	1.05121e+06	903692	1.02244e+06	1.0258e+06	712852	1.0497e+06	974067	985378	956483	1.29345e+06	965833	839298	809916	516951	952401	743941	849622	666038	1.49044e+06	819875	1113244	1.01602e+06	1.06159e+06	952556	829327	1.16578e+06	1.01851e+06	830358	1.45445e+06	1147009	1.02016e+06	966966	1.05761e+06
G3XD21	G3XD21	PA2019	Resistance-Nodulation-Cell Division (RND) multidrug efflux membrane fusion protein	G3XD21	G3XD21_PSEAE	>tr|G3XD21|G3XD21_PSEAE Resistance-Nodulation-Cell Division (RND) multidrug efflux membrane fusion protein OS=Pseudomonas aeruginosa (strain ATCC 15692 / DSM 22644 / CIP 104116 / JCM 14847 / LMG 12228 / 1C / PRS 101 / PAO1) OX=208964 GN=PA2019 PE=3 SV=1	42087	31688.2	31111.2	28254	26435.7	28455.6	31298.7	13793.7	13413.3	13257.6	12882.7	25095.6	590463	355917	587736	1.11562e+06	797734	15792	17358.1	37302.9	15335.1	461257	18265.8	65144.3	113016	286895	29083.4	21384.5	28467.3	19578.9	18796.6	18198.1	21229.8	20132	40463.9	590916	22558.2	29613.2	33707.8	28674
G3XD22	G3XD22	arsC	ArsC protein	G3XD22	G3XD22_PSEAE	>tr|G3XD22|G3XD22_PSEAE ArsC protein OS=Pseudomonas aeruginosa (strain ATCC 15692 / DSM 22644 / CIP 104116 / JCM 14847 / LMG 12228 / 1C / PRS 101 / PAO1) OX=208964 GN=arsC PE=4 SV=1	16567.9	10007.7	15148.2	6882.38	13000.5	23488.8	28218.5	30434.7	23046.2	31235.8	24780.8	7230.4	29809	18010.7	21365.7	15534.3	10076.5	15743.2	8227.69	13430.8	14853.6	11953.2	28392.2	9233.3	19095.2	16660.6	8350.72	21134.6	9843	20858.5	32606.6	34724.1	12539.2	27921.3	20140.4	4513.51	12818.1	24552	6782.31	24064.2
G3XD24	G3XD24	pctA	Methyl-accepting chemotaxis protein PctA	G3XD24	PCTA_PSEAE	>sp|G3XD24|PCTA_PSEAE Methyl-accepting chemotaxis protein PctA OS=Pseudomonas aeruginosa (strain ATCC 15692 / DSM 22644 / CIP 104116 / JCM 14847 / LMG 12228 / 1C / PRS 101 / PAO1) OX=208964 GN=pctA PE=1 SV=1	68017.1	193611	246989	217972	250930	227731	195152	142818	106359	194455	88268.1	63599.7	140338	83624.5	93165.3	127262	62885.5	157428	117166	132785	29204.7	165296	99418.8	109975	57971.8	251475	103330	157082	69877	146251	121727	116673	113726	135840	60186.9	32194.7	33383.9	141303	75886.5	72973.5
G3XD25	G3XD25	mexC	Resistance-Nodulation-Cell Division (RND) multidrug efflux membrane fusion protein MexC	G3XD25	G3XD25_PSEAE	>tr|G3XD25|G3XD25_PSEAE Resistance-Nodulation-Cell Division (RND) multidrug efflux membrane fusion protein MexC OS=Pseudomonas aeruginosa (strain ATCC 15692 / DSM 22644 / CIP 104116 / JCM 14847 / LMG 12228 / 1C / PRS 101 / PAO1) OX=208964 GN=mexC PE=3 SV=1	40838.5	23415.4	11885.1	23375.6	10224.3	21335.5	22266.8	14964.8	24574.4	21670.4	21706.7	18601.3	23060.4	19521.2	24995.1	14441.4	23677.7	26489.9	15716.8	18738.5	14715.3	21732.7	17327	25795.5	28397.1	12661	18538	31999	19218.7	15645.8	20580.2	21185.6	14862.8	20531.6	22484.4	131709	16797.6	21961.8	15147.9	22431.4
G3XD26	G3XD26	PA3978	Sel1 repeat family protein	G3XD26	G3XD26_PSEAE	>tr|G3XD26|G3XD26_PSEAE Sel1 repeat family protein OS=Pseudomonas aeruginosa (strain ATCC 15692 / DSM 22644 / CIP 104116 / JCM 14847 / LMG 12228 / 1C / PRS 101 / PAO1) OX=208964 GN=PA3978 PE=4 SV=1	19636.3	2724.97	12798.7	9430.27	11331.2	12695.4	18072.3	17610.7	19358.9	15417.1	5680.43	2.09677	14818.9	2885.27	3715.58	4280.42	10357.6	1429.63	26656.7	3601.76	20.7305	16878	2008.51	8301.28	15437.5	7735.91	12728	10099.5	3303.46	15269.6	14466.8	10005.3	17259	15067.9	8522.29	16583.2	12144.7	11983.4	1309.22	9062.71
G3XD27	G3XD27	PA5055	Gamma-butyrobetaine hydroxylase-like N-terminal domain-containing protein	G3XD27	G3XD27_PSEAE	>tr|G3XD27|G3XD27_PSEAE Gamma-butyrobetaine hydroxylase-like N-terminal domain-containing protein OS=Pseudomonas aeruginosa (strain ATCC 15692 / DSM 22644 / CIP 104116 / JCM 14847 / LMG 12228 / 1C / PRS 101 / PAO1) OX=208964 GN=PA5055 PE=4 SV=1	13653.4	24194.8	24416.5	25770	24046	22371.9	27927.8	33969.6	45805.3	29221	40972.1	27355.6	33647.4	35891.2	37655.2	23715.4	35193.1	31448.1	63836.8	21702.2	7226.44	45577	21882.8	21880.1	38786.8	25430.8	27782.5	38010.6	26439.5	36921.9	35544.8	24575	34950.4	30676.3	14702.5	23545	39027.2	39112.1	16076	29428.1
G3XD28	G3XD28	pilM	Type IV pilus inner membrane component PilM	G3XD28	PILM_PSEAE	>sp|G3XD28|PILM_PSEAE Type IV pilus inner membrane component PilM OS=Pseudomonas aeruginosa (strain ATCC 15692 / DSM 22644 / CIP 104116 / JCM 14847 / LMG 12228 / 1C / PRS 101 / PAO1) OX=208964 GN=pilM PE=1 SV=1	37983.5	813381	746404	706430	775834	789721	1.27367e+06	470469	515485	244530	335416	327417	403904	314907	323131	1.65295e+06	400813	186733	563860	582778	288075	669786	1.05642e+06	712725	678258	343929	717411	645850	871867	515395	664424	954888	629909	482017	842993	33877.2	196845	604224	962136	270733
G3XD29	G3XD29	nhaP	Na(+)/H(+) antiporter NhaP	G3XD29	NHAP_PSEAE	>sp|G3XD29|NHAP_PSEAE Na(+)/H(+) antiporter NhaP OS=Pseudomonas aeruginosa (strain ATCC 15692 / DSM 22644 / CIP 104116 / JCM 14847 / LMG 12228 / 1C / PRS 101 / PAO1) OX=208964 GN=nhaP PE=1 SV=1	45486.3	26625	31322.1	35578.6	17462.7	23629.4	39716.3	24737.3	42443.9	42697.5	22696.6	18404.4	21017.9	35531.8	15237.3	48016.2	28924.8	40465.2	26966.1	32644.2	11219.8	17138.9	19805	18496.8	17435.6	16049.3	27297.1	12133.6	38507.4	20360.9	37782.2	15486.3	31447.3	25444.1	37607.6	42826.7	20810.7	33543.8	30235.1	14496
G3XD30	G3XD30	pilN	Type IV pilus inner membrane component PilN	G3XD30	PILN_PSEAE	>sp|G3XD30|PILN_PSEAE Type IV pilus inner membrane component PilN OS=Pseudomonas aeruginosa (strain ATCC 15692 / DSM 22644 / CIP 104116 / JCM 14847 / LMG 12228 / 1C / PRS 101 / PAO1) OX=208964 GN=pilN PE=1 SV=1	22213.5	490807	454567	461652	471413	447880	733854	238587	259222	125461	137856	197235	192704	139431	190706	1.01329e+06	228111	80637	281877	4628.49	144529	407275	600012	435298	356161	59541	497720	368442	588247	282941	334687	564436	394608	290817	479701	12962	96963	337701	629353	118078
G3XD31	G3XD31	mrcB	Penicillin-binding protein 1B	G3XD31	G3XD31_PSEAE	>tr|G3XD31|G3XD31_PSEAE Penicillin-binding protein 1B OS=Pseudomonas aeruginosa (strain ATCC 15692 / DSM 22644 / CIP 104116 / JCM 14847 / LMG 12228 / 1C / PRS 101 / PAO1) OX=208964 GN=mrcB PE=3 SV=1	85487.3	73275.2	107311	97555.8	104766	112381	109209	72640.8	67946.9	79063.1	59193.7	39797.6	82184	47936.8	64427.1	79351.1	88112.6	75764.2	75666	72816	22772.5	75347.5	50817.1	71616.3	76298.2	94591.2	83990.5	70970.5	49860.8	73195.8	75508.3	68231.9	78440.9	69120.8	74862.7	455770	82909.1	73356.2	55487.8	57761.2
G3XD32	G3XD32	PA1872	Peptidase	G3XD32	G3XD32_PSEAE	>tr|G3XD32|G3XD32_PSEAE Peptidase OS=Pseudomonas aeruginosa (strain ATCC 15692 / DSM 22644 / CIP 104116 / JCM 14847 / LMG 12228 / 1C / PRS 101 / PAO1) OX=208964 GN=PA1872 PE=4 SV=1	27755.2	36008	31290.5	31967.4	30374.1	30283.3	37932.8	26914.7	25828.4	25584.7	27295	25893.4	1642.98	34463.7	1483.86	18055.2	1780.23	27972.2	32821.4	31469.3	39216.1	35955.4	20452.6	21125.4	30039.3	28406.4	24619.4	15326.5	16745.6	20808.2	18416.3	17748.5	21063.3	55776.9	16732.2	29761.2	75355.4	25308.5	20752.3	30557.7
G3XD35	G3XD35	waaF	lipopolysaccharide heptosyltransferase II	G3XD35	G3XD35_PSEAE	>tr|G3XD35|G3XD35_PSEAE lipopolysaccharide heptosyltransferase II OS=Pseudomonas aeruginosa (strain ATCC 15692 / DSM 22644 / CIP 104116 / JCM 14847 / LMG 12228 / 1C / PRS 101 / PAO1) OX=208964 GN=waaF PE=3 SV=1	38409.6	59091.7	76283.6	75690.2	80420.6	73108.2	78167.8	84575.8	78142.9	93755.1	71766.6	42578.5	69579.6	58634.3	78762.6	69806.3	81405.7	62437.9	78858.3	56523.4	61802.9	89634.9	71877.8	89933.5	96697.2	75997.9	85800.2	83824.6	77921.2	82076.9	87796.4	70761.2	88336.1	89407	80983.5	72645.2	158586	74984.4	38906.8	91109.9
G3XD36	G3XD36	ptsP	phosphoenolpyruvate--protein phosphotransferase	G3XD36	G3XD36_PSEAE	>tr|G3XD36|G3XD36_PSEAE phosphoenolpyruvate--protein phosphotransferase OS=Pseudomonas aeruginosa (strain ATCC 15692 / DSM 22644 / CIP 104116 / JCM 14847 / LMG 12228 / 1C / PRS 101 / PAO1) OX=208964 GN=ptsP PE=3 SV=1	83606.5	170017	224117	218448	224852	226281	197483	217770	215300	211486	207210	176230	219624	170520	166798	168605	156883	243333	200799	193672	116418	170121	168516	220611	181573	191542	201827	190215	132739	205500	206840	200458	227811	218025	169318	191052	180620	220379	175939	221987
G3XD38	G3XD38	PA0633	Phage tail protein	G3XD38	G3XD38_PSEAE	>tr|G3XD38|G3XD38_PSEAE Phage tail protein OS=Pseudomonas aeruginosa (strain ATCC 15692 / DSM 22644 / CIP 104116 / JCM 14847 / LMG 12228 / 1C / PRS 101 / PAO1) OX=208964 GN=PA0633 PE=4 SV=1	17538.6	779.165	1711.87	3232.68	11416	12400.4	477.725	5761.13	400.279	8326.36	11455.7	3001.13	13216.4	8734.96	13769.4	12305.5	17048.1	11120.9	304.117	28929.9	736.94	5223.72	1546.24	120963	8997.43	20910.5	7829.48	10922.6	128931	9992.24	40857.8	48423.2	14582.6	26749.9	16481.7	83023.2	28709.1	5099.9	13306.9	3195.1
G3XD39	G3XD39	PA0622	Probable bacteriophage protein	G3XD39	G3XD39_PSEAE	>tr|G3XD39|G3XD39_PSEAE Probable bacteriophage protein OS=Pseudomonas aeruginosa (strain ATCC 15692 / DSM 22644 / CIP 104116 / JCM 14847 / LMG 12228 / 1C / PRS 101 / PAO1) OX=208964 GN=PA0622 PE=1 SV=1	41209.5	23276.6	36227.3	32056	34119.3	35558.3	38205.4	61586	64084.2	29173.5	31188.2	27087.9	41008.1	19447.2	54050.8	62160.6	148337	28694.5	69183.4	61891.4	19647.3	697914	41786.1	21800.7	531300	23939.7	62836.9	93571.7	9032.53	46750.7	43666.3	17030	23100.1	54159.4	10431.6	136405	108544	21113.8	31947.2	22546.8
G3XD40	G3XD40	PA3925	Probable acyl-CoA thiolase	G3XD40	G3XD40_PSEAE	>tr|G3XD40|G3XD40_PSEAE Probable acyl-CoA thiolase OS=Pseudomonas aeruginosa (strain ATCC 15692 / DSM 22644 / CIP 104116 / JCM 14847 / LMG 12228 / 1C / PRS 101 / PAO1) OX=208964 GN=PA3925 PE=1 SV=1	40553.6	110026	121103	114810	120339	133904	133317	141118	88401	94279.3	155687	133701	158812	145255	149994	134137	142809	79964.3	79758.3	85613.2	87781.7	112522	133093	159947	121803	104058	120342	96508.4	89920.1	84038.9	134159	155483	81983.8	137404	171705	192091	92220.6	108938	89648.3	89240.8
G3XD43	G3XD43	pilE	Type IV pilus non-core minor pilin PilE	G3XD43	PILE_PSEAE	>sp|G3XD43|PILE_PSEAE Type IV pilus non-core minor pilin PilE OS=Pseudomonas aeruginosa (strain ATCC 15692 / DSM 22644 / CIP 104116 / JCM 14847 / LMG 12228 / 1C / PRS 101 / PAO1) OX=208964 GN=pilE PE=1 SV=1	15279.3	153037	157453	146208	167095	142238	225712	95683	84068.2	86593.5	73344.3	73654.5	117084	76802	106803	300035	91804.9	86198.8	145060	174032	80521.4	165326	269241	165853	123235	122871	207638	139682	220652	110744	106921	5067.73	141141	99341.6	2303.48	70083.2	44422.2	116766	196327	2242.56
G3XD46	G3XD46	ftsI	Peptidoglycan D,D-transpeptidase FtsI	G3XD46	FTSI_PSEAE	>sp|G3XD46|FTSI_PSEAE Peptidoglycan D,D-transpeptidase FtsI OS=Pseudomonas aeruginosa (strain ATCC 15692 / DSM 22644 / CIP 104116 / JCM 14847 / LMG 12228 / 1C / PRS 101 / PAO1) OX=208964 GN=ftsI PE=1 SV=1	62856.2	42586.8	39190	45605.9	37361	53003.6	67513.6	71305.4	44390	66378.1	42203.7	58916	60155.7	41627.7	67454.8	87394.2	115146	29372.5	27441.4	52266.2	26640.3	41870.6	102461	101679	158031	81256.7	90702.9	114789	155759	88756.5	118117	109548	95969.4	84880.1	124970	297053	116087	82861.3	114187	86532.7
G3XD47	G3XD47	aotJ	L-arginine-binding protein	G3XD47	ARGBP_PSEAE	>sp|G3XD47|ARGBP_PSEAE L-arginine-binding protein OS=Pseudomonas aeruginosa (strain ATCC 15692 / DSM 22644 / CIP 104116 / JCM 14847 / LMG 12228 / 1C / PRS 101 / PAO1) OX=208964 GN=aotJ PE=1 SV=1	28010	263652	247774	242365	261463	269171	300490	588002	903599	774425	931181	519956	758679	929816	755373	337811	784324	388730	948482	349003	687300	649990	214822	407608	508688	286139	340417	503651	701219	673802	553444	512174	831145	600365	295869	642940	260892	308422	334897	265178
G3XD48	G3XD48	PA5008	Heptose kinase	G3XD48	G3XD48_PSEAE	>tr|G3XD48|G3XD48_PSEAE Heptose kinase OS=Pseudomonas aeruginosa (strain ATCC 15692 / DSM 22644 / CIP 104116 / JCM 14847 / LMG 12228 / 1C / PRS 101 / PAO1) OX=208964 GN=PA5008 PE=4 SV=1	29059.4	55474.8	52797.7	48552.8	54595.3	51878.2	50092.4	37977.8	37237.7	43860.8	34644.6	44300.6	46317.4	33099.7	40244.1	46473.7	39846.2	34902.9	29029.7	33925.5	31943.1	38854.6	35514.4	40391.8	37637.1	43806.7	40527.4	35974.2	32538.9	35456.8	37819.6	35777.9	37695.6	35764.4	31769.5	46176.4	64004.4	30951.9	32757.1	39959
G3XD49	G3XD49	pcrV	Type III secretion protein PcrV	G3XD49	G3XD49_PSEAE	>tr|G3XD49|G3XD49_PSEAE Type III secretion protein PcrV OS=Pseudomonas aeruginosa (strain ATCC 15692 / DSM 22644 / CIP 104116 / JCM 14847 / LMG 12228 / 1C / PRS 101 / PAO1) OX=208964 GN=pcrV PE=1 SV=1	32283.5	2324.74	6980.65	4119.88	5929.25	4224.26	8998.72	35448.4	13592.4	3947.97	35527.4	18755.4	85783.1	51261.2	47710.2	9445.34	54847.6	3296.32	31224.8	6387.9	1662.51	25112.7	14207.3	5650.72	52356.2	5138.84	9129.66	14559.2	26546.5	13988.7	13354.8	11380.2	8322.61	19140.8	10040.4	3614.54	2959.76	12646.5	40837	15702.7
G3XD51	G3XD51	pilO	Type IV pilus inner membrane component PilO	G3XD51	PILO_PSEAE	>sp|G3XD51|PILO_PSEAE Type IV pilus inner membrane component PilO OS=Pseudomonas aeruginosa (strain ATCC 15692 / DSM 22644 / CIP 104116 / JCM 14847 / LMG 12228 / 1C / PRS 101 / PAO1) OX=208964 GN=pilO PE=1 SV=1	22819.2	538888	547638	589457	552607	524968	934585	385469	398208	170810	206262	205438	221378	161645	206972	1.0725e+06	300500	92817.1	381719	4550.94	55216.6	527863	766335	487091	496797	159683	630585	484654	660939	371664	449317	643621	484243	368950	604212	18348.2	120764	454254	571738	158222
G3XD52	G3XD52	PA3302	MaoC-like domain-containing protein	G3XD52	G3XD52_PSEAE	>tr|G3XD52|G3XD52_PSEAE MaoC-like domain-containing protein OS=Pseudomonas aeruginosa (strain ATCC 15692 / DSM 22644 / CIP 104116 / JCM 14847 / LMG 12228 / 1C / PRS 101 / PAO1) OX=208964 GN=PA3302 PE=4 SV=1	16901.4	338051	307272	307818	310235	352333	319636	417863	520998	466058	571608	409018	389903	548458	385750	379842	276465	306481	695389	299625	319941	440116	566702	311852	442279	192895	299832	467853	356909	561218	565036	396503	500395	357849	234847	150524	262685	593739	301008	432406
G3XD53	G3XD53	PA2321	Gluconokinase	G3XD53	G3XD53_PSEAE	>tr|G3XD53|G3XD53_PSEAE Gluconokinase OS=Pseudomonas aeruginosa (strain ATCC 15692 / DSM 22644 / CIP 104116 / JCM 14847 / LMG 12228 / 1C / PRS 101 / PAO1) OX=208964 GN=PA2321 PE=3 SV=1	18456.3	4743.51	5099.41	5627.09	4954.59	4474.78	4666.08	9362.79	18315.9	11028.6	14015.2	8751.05	13889.8	9734.36	17545.9	15201.1	5670.14	19808.2	7737.83	20722.4	297.589	4562.68	4504.94	10509	18657.9	14234.3	3365.96	46595.5	12178.7	50772.4	38769	11789.2	32629.6	18247.1	7189.43	13135.1	30841.7	15288.7	3085.55	41318.1
G3XD54	G3XD54	dnaQ	DNA polymerase III subunit epsilon	G3XD54	G3XD54_PSEAE	>tr|G3XD54|G3XD54_PSEAE DNA polymerase III subunit epsilon OS=Pseudomonas aeruginosa (strain ATCC 15692 / DSM 22644 / CIP 104116 / JCM 14847 / LMG 12228 / 1C / PRS 101 / PAO1) OX=208964 GN=dnaQ PE=4 SV=1	26814.2	56119.8	51121.2	50690.8	52457.6	59680.5	40585.1	30095	33522	30805.8	37031.3	39958.3	28780	42418.2	37747	64620.4	72367.8	23808.2	28088.7	33295.7	33797.6	29641.5	48791.2	36968.9	50906.5	53949.2	34790.1	54223.4	51334.7	44903	53149	54016.3	34468	32636.7	74555.6	81500.1	47969.8	37238.9	48790.3	50271.7
G3XD55	G3XD55	pilY2	Type 4 fimbrial biogenesis protein PilY2	G3XD55	G3XD55_PSEAE	>tr|G3XD55|G3XD55_PSEAE Type 4 fimbrial biogenesis protein PilY2 OS=Pseudomonas aeruginosa (strain ATCC 15692 / DSM 22644 / CIP 104116 / JCM 14847 / LMG 12228 / 1C / PRS 101 / PAO1) OX=208964 GN=pilY2 PE=4 SV=1	12985.8	78452.1	83289.4	77005.7	87476.3	84547.6	76150.1	63615.1	75993	36163.4	66949.7	29250.5	44475	28170.1	54215.2	100969	58626.9	37919.1	45257.4	52975.7	14925.3	98946	48679.5	55725.5	73714.4	56686.6	68060.7	77180.8	112221	62443.4	67593.6	16573.8	117464	79280.1	8790	45487.4	32059.5	64798.2	49781.5	20347.9
G3XD57	G3XD57	PA0636	Bacteriophage tail tape measure C-terminal domain-containing protein	G3XD57	G3XD57_PSEAE	>tr|G3XD57|G3XD57_PSEAE Bacteriophage tail tape measure C-terminal domain-containing protein OS=Pseudomonas aeruginosa (strain ATCC 15692 / DSM 22644 / CIP 104116 / JCM 14847 / LMG 12228 / 1C / PRS 101 / PAO1) OX=208964 GN=PA0636 PE=4 SV=1	63717.1	6110.27	36899.9	9047.33	44937.2	44305.4	7129.61	20317.4	13844.4	29790.9	37302.1	15815.9	41171.9	37502.6	22120.6	28111.5	49104	5117.13	850.222	32076	1103.78	32261	39415.9	41337	36692.6	33892.5	28887.2	22275.5	34953.4	40429.8	24420.7	43335.6	94.0995	24233.7	52495.8	75980.9	38650.7	27035.8	31382.9	27584.4
G3XD58	G3XD58	wzt	ABC subunit of A-band LPS efflux transporter	G3XD58	G3XD58_PSEAE	>tr|G3XD58|G3XD58_PSEAE ABC subunit of A-band LPS efflux transporter OS=Pseudomonas aeruginosa (strain ATCC 15692 / DSM 22644 / CIP 104116 / JCM 14847 / LMG 12228 / 1C / PRS 101 / PAO1) OX=208964 GN=wzt PE=3 SV=1	47153.9	38561.6	39505.8	35388.1	38280.9	36571.2	23840.9	26945	20777	38014.3	26490.3	17559.2	30988.5	30785.4	28673.7	25934.9	18409.4	16544.9	19855.3	20846.9	34810.3	37555.4	29709.9	20781.4	19789.4	34858.3	28332.3	26741.3	24763.7	39445.9	31400.9	21917.8	32165.4	20854.7	11804.1	48080.8	10975.3	48045.3	24348.5	38038.1
G3XD60	G3XD60	narK1	Nitrite extrusion protein 1	G3XD60	G3XD60_PSEAE	>tr|G3XD60|G3XD60_PSEAE Nitrite extrusion protein 1 OS=Pseudomonas aeruginosa (strain ATCC 15692 / DSM 22644 / CIP 104116 / JCM 14847 / LMG 12228 / 1C / PRS 101 / PAO1) OX=208964 GN=narK1 PE=3 SV=1	47253.8	8827.41	5450.39	3124.38	4671.46	6485.31	4472.81	9334.75	953.83	633.616	9072.08	2610.5	2663.35	1595.47	4493.87	1243.56	3363.64	3633.11	4359.56	3288.54	1647.13	1.55268	950.254	13078.9	6672.48	667.503	11589.4	1785.89	8970.99	6104.46	5484.11	2893.16	1053.37	601.398	3403.35	3857.86	208.129	6508.75	6274.18	1927.55
G3XD63	G3XD63	chpB	protein-glutamate methylesterase	G3XD63	G3XD63_PSEAE	>tr|G3XD63|G3XD63_PSEAE protein-glutamate methylesterase OS=Pseudomonas aeruginosa (strain ATCC 15692 / DSM 22644 / CIP 104116 / JCM 14847 / LMG 12228 / 1C / PRS 101 / PAO1) OX=208964 GN=chpB PE=4 SV=1	37237.1	66196	59328.4	56083.3	60168.3	61165.5	63482.7	33180.1	31751.3	8231.04	27746.2	31152.9	27611	22253.6	22035.8	70247	30942.8	11502.2	19392.2	43843.8	21617.3	42506	70426.7	39413.9	46221.2	40960.1	40110.9	44938.3	33342.8	29630	42542.6	56645.6	35395.3	35747	44167.5	15050.2	8158	37495	60995.9	21353.5
G3XD64	G3XD64	fleN	Antiactivator FleN	G3XD64	FLEN_PSEAE	>sp|G3XD64|FLEN_PSEAE Antiactivator FleN OS=Pseudomonas aeruginosa (strain ATCC 15692 / DSM 22644 / CIP 104116 / JCM 14847 / LMG 12228 / 1C / PRS 101 / PAO1) OX=208964 GN=fleN PE=1 SV=1	30036.9	526975	523559	559639	602593	518675	438884	385605	399988	474756	399495	293873	349460	329428	337820	306023	266846	483993	460550	238553	435901	308616	330619	354193	370814	359310	425875	343569	239547	352644	355873	323763	428095	372155	242037	227025	301530	397240	338972	454205
G3XD65	G3XD65	PA0626	Phage tail protein	G3XD65	G3XD65_PSEAE	>tr|G3XD65|G3XD65_PSEAE Phage tail protein OS=Pseudomonas aeruginosa (strain ATCC 15692 / DSM 22644 / CIP 104116 / JCM 14847 / LMG 12228 / 1C / PRS 101 / PAO1) OX=208964 GN=PA0626 PE=1 SV=1	31291.8	2079.84	2880.6	3342.58	3142.86	4839.25	3241.56	6749.81	5270.54	2382.21	5272.76	6149.96	4806.98	4919.42	3480.92	13122.7	21952.1	2216.05	6001.02	8150.17	2618.97	51101.5	8016.77	1983.57	70621.5	2874.23	1852.64	9185.75	2104.39	6893.93	5916.72	2116.67	3632.12	4067.71	897.881	12263.7	14065.3	6628.76	4586.43	3934.63
G3XD66	G3XD66	narX	Sensor protein	G3XD66	G3XD66_PSEAE	>tr|G3XD66|G3XD66_PSEAE Sensor protein OS=Pseudomonas aeruginosa (strain ATCC 15692 / DSM 22644 / CIP 104116 / JCM 14847 / LMG 12228 / 1C / PRS 101 / PAO1) OX=208964 GN=narX PE=4 SV=1	69324.5	151872	134270	130728	130883	153498	99101.3	26684.4	30294.8	28547.3	36103	52493.1	38310.7	42154.1	42241.6	139370	79357.5	56674.6	25353.7	131941	28362.3	29823.3	53039.7	66511.9	110777	113409	69843.2	37908.8	40003.3	36512.7	35905.9	89697.8	25625.2	28282.1	173331	39789.3	23956	27193.2	116151	34410.1
G3XD67	G3XD67	hcnA	Hydrogen cyanide synthase subunit HcnA	G3XD67	HCNA_PSEAE	>sp|G3XD67|HCNA_PSEAE Hydrogen cyanide synthase subunit HcnA OS=Pseudomonas aeruginosa (strain ATCC 15692 / DSM 22644 / CIP 104116 / JCM 14847 / LMG 12228 / 1C / PRS 101 / PAO1) OX=208964 GN=hcnA PE=1 SV=1	11427.1	43139.7	41782.8	38898.1	42901.5	30752.3	54059.1	25964.8	1875.82	47335.6	29124.8	18093.6	11465.4	19894.1	28212.5	20272.7	20339.7	36081.1	75.3881	16778.6	9609.09	10433.1	24395.1	51699.3	66237.9	14039.5	49841.4	58691.9	71964.3	49312	74297.5	35081.3	53441.8	25992.1	19124.9	16389.1	8958.98	70765.1	24369.9	34954.3
G3XD68	G3XD68	PA0634	Phage tail assembly chaperone	G3XD68	G3XD68_PSEAE	>tr|G3XD68|G3XD68_PSEAE Phage tail assembly chaperone OS=Pseudomonas aeruginosa (strain ATCC 15692 / DSM 22644 / CIP 104116 / JCM 14847 / LMG 12228 / 1C / PRS 101 / PAO1) OX=208964 GN=PA0634 PE=4 SV=1	12870.4	2499.76	3436.04	468.084	189.245	2271.56	226.135	1536.91	2809.01	3257.45	1603.74	22054.7	1952.79	1387.38	1438.93	3590.96	628.157	1202.84	1800.72	14998.6	140.478	127.512	2477.55	12728.9	2033.83	16821.3	13180.8	210.558	43321.5	3406.55	1521.97	20055.7	6218.1	1352.14	36809.6	53397.3	1477.67	540.048	10316.9	3692.24
G3XD69	G3XD69	PA4521	AmpE protein	G3XD69	G3XD69_PSEAE	>tr|G3XD69|G3XD69_PSEAE AmpE protein OS=Pseudomonas aeruginosa (strain ATCC 15692 / DSM 22644 / CIP 104116 / JCM 14847 / LMG 12228 / 1C / PRS 101 / PAO1) OX=208964 GN=PA4521 PE=4 SV=1	30793.5	64351.7	52506	58371.4	55377	57481.5	18649.4	31253.7	45594.1	21677.2	31578.6	36301.1	26579.6	32732	28117.7	24607.3	17696.5	74284.1	7303.03	50471.1	60621.7	29849.6	39726.5	32016.7	34749.7	38938.5	22703.5	56737	36505.3	47809.5	31026.6	36692.5	20936.3	26895.1	36322.7	37061.8	13206.7	32913.7	47875.5	31004.8
G3XD70	G3XD70	PA5279	DUF484 family protein	G3XD70	G3XD70_PSEAE	>tr|G3XD70|G3XD70_PSEAE DUF484 family protein OS=Pseudomonas aeruginosa (strain ATCC 15692 / DSM 22644 / CIP 104116 / JCM 14847 / LMG 12228 / 1C / PRS 101 / PAO1) OX=208964 GN=PA5279 PE=4 SV=1	25767.2	108188	116410	117815	117766	116548	97798.7	65440.7	60948.3	66008.1	57013.5	56794.6	51845.3	53932.8	67656	78163.4	61816.2	67317.9	48479.6	31369.2	19940.1	61067.4	74275.7	79834.9	69588.5	100232	88750.7	79580.6	65066.7	66824.9	79301.3	80783.7	67275.3	75516.8	81295.2	51719.8	67952	66630.7	71371.9	67613.6
G3XD71	G3XD71	PA0620	Probable bacteriophage protein	G3XD71	G3XD71_PSEAE	>tr|G3XD71|G3XD71_PSEAE Probable bacteriophage protein OS=Pseudomonas aeruginosa (strain ATCC 15692 / DSM 22644 / CIP 104116 / JCM 14847 / LMG 12228 / 1C / PRS 101 / PAO1) OX=208964 GN=PA0620 PE=1 SV=1	72292.8	18944.4	17321.9	23721.3	23183.5	24693.9	11649	20247	15452.6	20875.3	10707.6	13571.8	15312.7	14358.1	24140.4	30707	98584.7	5917.45	17322.7	41672.3	6994.28	213663	22371.5	12449.7	265706	15989.2	6823.63	34539.6	4287.2	21430.8	15570.9	9507.37	7917.71	10968.3	10023.3	54272.8	57667.7	8412.76	17028.1	14497.8
G3XD72	G3XD72	PA1464	Probable purine-binding chemotaxis protein	G3XD72	G3XD72_PSEAE	>tr|G3XD72|G3XD72_PSEAE Probable purine-binding chemotaxis protein OS=Pseudomonas aeruginosa (strain ATCC 15692 / DSM 22644 / CIP 104116 / JCM 14847 / LMG 12228 / 1C / PRS 101 / PAO1) OX=208964 GN=PA1464 PE=4 SV=1	17536	650598	670175	645207	645372	557720	620840	830693	796779	688859	686400	485558	629634	658357	608490	534993	461919	739978	868804	614190	758524	759295	616449	698986	539332	568498	566756	784219	550845	771776	769025	544615	954118	674000	425451	128186	372661	727068	501226	862477
G3XD73	G3XD73	motC	MotC	G3XD73	G3XD73_PSEAE	>tr|G3XD73|G3XD73_PSEAE MotC OS=Pseudomonas aeruginosa (strain ATCC 15692 / DSM 22644 / CIP 104116 / JCM 14847 / LMG 12228 / 1C / PRS 101 / PAO1) OX=208964 GN=motC PE=3 SV=1	25959.5	25504.5	20568.4	16936	21284.5	23775.2	30134.7	23832.7	14621.7	22743.6	12348.5	8681.76	25447.3	14152.6	21371.1	31859.8	9888.13	25487.2	23111	20284.7	38371.6	21685.2	20937.5	14001.9	10914.7	6933.07	11947.6	20224.8	20487.6	18185.7	17113.9	15719.9	14643.6	12209.6	8904.14	11458.7	15590.3	25512	28153.8	16561.5
G3XD74	G3XD74	dacC	serine-type D-Ala-D-Ala carboxypeptidase	G3XD74	G3XD74_PSEAE	>tr|G3XD74|G3XD74_PSEAE serine-type D-Ala-D-Ala carboxypeptidase OS=Pseudomonas aeruginosa (strain ATCC 15692 / DSM 22644 / CIP 104116 / JCM 14847 / LMG 12228 / 1C / PRS 101 / PAO1) OX=208964 GN=dacC PE=3 SV=1	42457.6	415800	467961	454987	477218	492008	419750	404571	323272	375654	319456	297997	328953	337442	337306	446122	471192	283665	361729	284654	138480	407589	327452	332992	410621	550203	381165	441273	340928	419636	413454	416831	417981	374654	426463	1.0128e+06	448083	378837	304626	303750
G3XD76	G3XD76	dapD	2,3,4,5-tetrahydropyridine-2,6-dicarboxylate N-succinyltransferase	G3XD76	DAPD_PSEAE	>sp|G3XD76|DAPD_PSEAE 2,3,4,5-tetrahydropyridine-2,6-dicarboxylate N-succinyltransferase OS=Pseudomonas aeruginosa (strain ATCC 15692 / DSM 22644 / CIP 104116 / JCM 14847 / LMG 12228 / 1C / PRS 101 / PAO1) OX=208964 GN=dapD PE=1 SV=1	35973.3	832297	786251	843607	824903	825373	1.00303e+06	1.14842e+06	1.08423e+06	896172	1.15396e+06	1.41336e+06	849688	1.21523e+06	921875	985482	1.5631e+06	974263	1.67606e+06	1.41863e+06	761426	1.39538e+06	1.37827e+06	1.28358e+06	1337874	1.15836e+06	1.18832e+06	1.24714e+06	1358267	983650	1.14554e+06	1.42522e+06	1.07716e+06	1.15934e+06	1684792	1.00788e+06	1521265	1.02281e+06	1331808	1.1239e+06
G3XD78	G3XD78	rsaL	Regulatory protein RsaL	G3XD78	G3XD78_PSEAE	>tr|G3XD78|G3XD78_PSEAE Regulatory protein RsaL OS=Pseudomonas aeruginosa (strain ATCC 15692 / DSM 22644 / CIP 104116 / JCM 14847 / LMG 12228 / 1C / PRS 101 / PAO1) OX=208964 GN=rsaL PE=4 SV=1	9392.58	3200.19	884.142	1515.49	2174.49	1345.91	3862.48	230498	311614	254420	262913	164788	240788	184199	188289	804.841	119125	21687.2	317655	596.937	202248	332722	114990	20596.7	79413.1	12804.6	1569.35	275338	244223	419608	332147	2014.55	341270	346456	1694.3	1243.02	297709	417293	7539.55	350875
G3XD79	G3XD79	PA4392	Methylated-DNA-[protein]-cysteine S-methyltransferase DNA binding domain-containing protein	G3XD79	G3XD79_PSEAE	>tr|G3XD79|G3XD79_PSEAE Methylated-DNA-[protein]-cysteine S-methyltransferase DNA binding domain-containing protein OS=Pseudomonas aeruginosa (strain ATCC 15692 / DSM 22644 / CIP 104116 / JCM 14847 / LMG 12228 / 1C / PRS 101 / PAO1) OX=208964 GN=PA4392 PE=4 SV=1	13895.8	13907.6	12293.3	12004.3	11939.4	13798.9	14025	26592.7	27390.9	33482.8	13604	12533.2	10432	13716.6	12790	11234.6	6502.29	36334	16773.8	16532.2	28448.5	10420.8	22905.7	22407.3	22179.1	14227.3	16622.3	24347.2	25419	33697	4196.25	19371.4	31267.2	28705.7	13127.5	52525.6	18008.2	30146.3	8095.48	32184
G3XD80	G3XD80	PA0510	uroporphyrinogen-III C-methyltransferase	G3XD80	G3XD80_PSEAE	>tr|G3XD80|G3XD80_PSEAE uroporphyrinogen-III C-methyltransferase OS=Pseudomonas aeruginosa (strain ATCC 15692 / DSM 22644 / CIP 104116 / JCM 14847 / LMG 12228 / 1C / PRS 101 / PAO1) OX=208964 GN=PA0510 PE=3 SV=1	29654.2	83148.1	84201.6	84999.4	82777.6	81224.7	84186.3	14090.2	8858.17	12276.6	17529.7	16336.4	20179.2	18066.2	29961	86280	52714	9426.34	7510.75	31431.7	9077.42	13171.4	9696.14	38361.1	7679.52	39755.1	60673.8	21228	44499.3	18275.9	22553.9	58657	20601.1	11668.6	84312.8	4783.11	6135.11	14244.4	31286.7	20627.1
G3XD84	G3XD84	pilV	Type 4 fimbrial biogenesis protein PilV	G3XD84	G3XD84_PSEAE	>tr|G3XD84|G3XD84_PSEAE Type 4 fimbrial biogenesis protein PilV OS=Pseudomonas aeruginosa (strain ATCC 15692 / DSM 22644 / CIP 104116 / JCM 14847 / LMG 12228 / 1C / PRS 101 / PAO1) OX=208964 GN=pilV PE=4 SV=1	20061.2	125873	139464	125743	133206	129791	180566	71941.4	64920.9	28071.8	47431.6	33054.3	43719.3	28310.8	47453.2	197741	69745.9	26970.7	47700.1	59179.9	18833.1	148392	152354	90311.2	110719	61251.8	152606	115231	119292	77458.2	95286.4	14721.5	101276	81770.7	6610.61	52344.8	32729.4	76859.7	119257	1799.14
G3XD87	G3XD87	narH	Respiratory nitrate reductase beta chain	G3XD87	G3XD87_PSEAE	>tr|G3XD87|G3XD87_PSEAE Respiratory nitrate reductase beta chain OS=Pseudomonas aeruginosa (strain ATCC 15692 / DSM 22644 / CIP 104116 / JCM 14847 / LMG 12228 / 1C / PRS 101 / PAO1) OX=208964 GN=narH PE=4 SV=1	58105.4	54600.7	48903.5	51819.9	50711.8	54196.8	35240.8	17030.3	22274	24079.2	26470.2	13713.6	17269.4	21010.5	26492.6	25883.5	53860.2	34017.8	3949.01	5228.5	12731	10370.2	13177.3	25208	73839.1	17338.1	46774.7	31620.3	27187	9542.27	19726.6	23043.5	10884.8	11571	49215.6	14398	7309.56	11116.5	50345	17571.4
G3XD88	G3XD88	rodA	Peptidoglycan glycosyltransferase MrdB	G3XD88	G3XD88_PSEAE	>tr|G3XD88|G3XD88_PSEAE Peptidoglycan glycosyltransferase MrdB OS=Pseudomonas aeruginosa (strain ATCC 15692 / DSM 22644 / CIP 104116 / JCM 14847 / LMG 12228 / 1C / PRS 101 / PAO1) OX=208964 GN=rodA PE=3 SV=1	40029.2	10546.6	15051.4	11779.7	11712.9	12476.2	3545.35	3769.81	8914.79	13198.2	5606.1	4007.82	12076	469.998	10932.5	12461.2	9174.11	11744.4	14050.7	17368.5	617.797	12218.6	3316.27	9804.05	6989.25	9696.96	13076.7	8875.15	3030.3	4176.7	9830.22	11673	11272.3	8260.12	13541.4	26355.2	2992.26	9253.84	3720.47	8497.23
G3XD89	G3XD89	oprC	Copper transport outer membrane porin OprC	G3XD89	G3XD89_PSEAE	>tr|G3XD89|G3XD89_PSEAE Copper transport outer membrane porin OprC OS=Pseudomonas aeruginosa (strain ATCC 15692 / DSM 22644 / CIP 104116 / JCM 14847 / LMG 12228 / 1C / PRS 101 / PAO1) OX=208964 GN=oprC PE=1 SV=1	79303.5	1.54897e+06	1603540	1.54928e+06	1.56033e+06	1.55841e+06	1.92446e+06	567207	574019	1312581	353141	285963	415798	383487	383835	2.19779e+06	484807	773343	295830	1.18217e+06	332061	928307	828061	1.04824e+06	681014	1.08086e+06	1.71566e+06	832695	729207	616555	742192	1.40457e+06	863704	526303	919291	324993	450483	469811	1.65535e+06	531444
G3XD90	G3XD90	motD	MotD	G3XD90	G3XD90_PSEAE	>tr|G3XD90|G3XD90_PSEAE MotD OS=Pseudomonas aeruginosa (strain ATCC 15692 / DSM 22644 / CIP 104116 / JCM 14847 / LMG 12228 / 1C / PRS 101 / PAO1) OX=208964 GN=motD PE=3 SV=1	32127.8	20494.7	24669.1	24606.4	24110.3	20367.7	21967.6	24307	17665.8	17267.4	13164.1	10906.5	15380.4	14728.1	16601.3	20912.4	10299.7	13735.2	22313.2	13149.4	7923.55	19439.3	12994.2	22507.5	20532.9	21788.6	18282.2	25039.6	15263.9	16792.1	19897.2	17827.9	25375.1	20202.4	11615.7	4844.59	14200.8	21959.5	13812.7	24526.1
G3XD91	G3XD91	phaD	Poly(3-hydroxyalkanoic acid) depolymerase	G3XD91	G3XD91_PSEAE	>tr|G3XD91|G3XD91_PSEAE Poly(3-hydroxyalkanoic acid) depolymerase OS=Pseudomonas aeruginosa (strain ATCC 15692 / DSM 22644 / CIP 104116 / JCM 14847 / LMG 12228 / 1C / PRS 101 / PAO1) OX=208964 GN=phaD PE=4 SV=1	31470.8	16265.4	18663.1	26638.8	8267.06	34179.2	5463.79	31114.1	67733.3	40268.3	42766.8	19808.3	19259.9	26090.4	50401.6	14658.5	15514	25169.4	15571.6	19607.9	117551	39067.5	25185.7	16495.6	27201.7	10145.3	15699.8	12215.4	12592.7	35142.1	30625.1	14263.5	27947.5	44856.8	24361.1	12506.6	24969.5	24867.7	23654.7	40762.8
G3XD94	G3XD94	wbpA	UDP-N-acetyl-D-glucosamine 6-dehydrogenase	G3XD94	UGND_PSEAE	>sp|G3XD94|UGND_PSEAE UDP-N-acetyl-D-glucosamine 6-dehydrogenase OS=Pseudomonas aeruginosa (strain ATCC 15692 / DSM 22644 / CIP 104116 / JCM 14847 / LMG 12228 / 1C / PRS 101 / PAO1) OX=208964 GN=wbpA PE=1 SV=1	48155.5	13493.8	12627	9869.08	39333.2	10574.2	10290.4	12037.3	8085.94	11018.4	5842.23	23098.1	11577.8	13964	34755.4	7608.9	10365.6	409817	8757.54	17455.8	931304	9385.4	574239	11224.9	10029.8	49417.2	528080	54565.1	520726	70784.1	10396.8	14197.9	14663.6	11786.6	12219.5	667809	10976.4	12345.9	496347	10347.9
G3XD95	G3XD95	chpC	Probable chemotaxis protein	G3XD95	G3XD95_PSEAE	>tr|G3XD95|G3XD95_PSEAE Probable chemotaxis protein OS=Pseudomonas aeruginosa (strain ATCC 15692 / DSM 22644 / CIP 104116 / JCM 14847 / LMG 12228 / 1C / PRS 101 / PAO1) OX=208964 GN=chpC PE=4 SV=1	17625.4	129639	95502.6	94962.8	91112.6	89323.9	128838	53587.6	50350.3	21054.6	47340.7	72322.9	62781	56370.1	66032.5	159931	64146.4	26925.4	24617.6	79354.3	31458.6	55266.8	114835	85698.3	81105	74980.1	91120.7	75624.2	100994	46775.9	91612.8	106994	84148.9	80825.6	117252	15682.6	11425.8	72161.3	117829	44382.7
G3XD97	G3XD97	ptxS	HTH-type transcriptional regulator PtxS	G3XD97	PTXS_PSEAE	>sp|G3XD97|PTXS_PSEAE HTH-type transcriptional regulator PtxS OS=Pseudomonas aeruginosa (strain ATCC 15692 / DSM 22644 / CIP 104116 / JCM 14847 / LMG 12228 / 1C / PRS 101 / PAO1) OX=208964 GN=ptxS PE=1 SV=1	37391.5	68776.9	68766.2	68512.3	68755.4	62644.2	53782.2	44295.5	43127.4	51675.6	33473.7	24648.2	25142.9	26557.2	20510.2	43844.1	14713.2	161654	30217.5	62811.7	57565.8	31410.4	21492.6	40662.8	24272	23593.6	47658.9	29227.8	16340.1	39009.5	13168.4	34542.7	51590.5	32595.7	30866.3	9736.29	27614	40728.5	24228.2	27706.2
G3XD98	G3XD98	gacS	histidine kinase	G3XD98	G3XD98_PSEAE	>tr|G3XD98|G3XD98_PSEAE histidine kinase OS=Pseudomonas aeruginosa (strain ATCC 15692 / DSM 22644 / CIP 104116 / JCM 14847 / LMG 12228 / 1C / PRS 101 / PAO1) OX=208964 GN=gacS PE=1 SV=1	101054	52837	59464	56040.3	56815	54751.5	53324.2	41011.2	60610.9	58087.3	57205.5	48775.4	60861.2	49736	56988.9	50019.6	38998	100634	67103.8	62057.2	37080.9	47227	58618.8	53117.9	59097.2	8258.51	52245.3	44262.2	46702	65294.4	61482.3	47373.1	64325.9	46803.9	43010.4	56861.9	32780.6	65761.3	54495.7	60001.3
G3XDA1	G3XDA1	exoS	Secreted exoenzyme S	G3XDA1	EXOS_PSEAE	>sp|G3XDA1|EXOS_PSEAE Secreted exoenzyme S OS=Pseudomonas aeruginosa (strain ATCC 15692 / DSM 22644 / CIP 104116 / JCM 14847 / LMG 12228 / 1C / PRS 101 / PAO1) OX=208964 GN=exoS PE=1 SV=1	48302.3	2606.69	2430.37	2170.12	3088.04	2753.96	4202.49	7361.79	1229.92	1159.5	916.01	2823.59	1254.18	3099.82	2214.42	1594.77	2215.4	3276.28	872.384	3012.6	1040.79	1234.52	13685.2	3114.53	2200.59	3912.71	4735.74	5447.25	17567.7	4099.28	4547.73	4752.54	2444.76	4631.47	6030.26	571.872	3919.71	3548.55	6830.18	2799.04
G3XDA2	G3XDA2	fabF1	3-oxoacyl-[acyl-carrier-protein] synthase 2	G3XDA2	G3XDA2_PSEAE	>tr|G3XDA2|G3XDA2_PSEAE 3-oxoacyl-[acyl-carrier-protein] synthase 2 OS=Pseudomonas aeruginosa (strain ATCC 15692 / DSM 22644 / CIP 104116 / JCM 14847 / LMG 12228 / 1C / PRS 101 / PAO1) OX=208964 GN=fabF1 PE=1 SV=1	43497.1	216281	231304	215869	232826	253887	221014	239244	246415	239902	280648	198371	286531	241569	285932	279459	361940	270517	199361	240681	115377	211906	293712	278101	257401	227360	305084	376465	306015	289872	346894	391620	274164	270954	404996	388484	448640	310827	323256	241862
G3XDA3	G3XDA3	ctpH	Methyl-accepting chemotaxis protein CtpH	G3XDA3	CTPH_PSEAE	>sp|G3XDA3|CTPH_PSEAE Methyl-accepting chemotaxis protein CtpH OS=Pseudomonas aeruginosa (strain ATCC 15692 / DSM 22644 / CIP 104116 / JCM 14847 / LMG 12228 / 1C / PRS 101 / PAO1) OX=208964 GN=ctpH PE=1 SV=1	61573.3	234497	236256	189626	280462	285546	138877	274978	111287	146314	124008	147212	130818	192597	193882	221033	144818	185730	262466	320120	62179.7	309579	160553	104646	85532.5	439429	115763	176625	161316	123946	187394	127289	143628	174701	89704.1	183475	80647.3	246519	189067	180616
G3XDA4	G3XDA4	PA0653	OsmC family protein	G3XDA4	G3XDA4_PSEAE	>tr|G3XDA4|G3XDA4_PSEAE OsmC family protein OS=Pseudomonas aeruginosa (strain ATCC 15692 / DSM 22644 / CIP 104116 / JCM 14847 / LMG 12228 / 1C / PRS 101 / PAO1) OX=208964 GN=PA0653 PE=4 SV=1	15236.6	28017.3	29488.4	30309.1	27685.9	31937.4	27276.9	52577.3	69611.2	70562	72467	45714	59464.8	64334.6	57844.7	30010.4	48714	66167.1	94905.5	40716.5	72661.2	60125.2	55438.9	52912.3	54561.4	29354	36895.4	52931.9	38397.4	86094.8	82504.7	43274	83625.3	61524.5	32868.7	45732	31090.4	69414.6	36731.9	58486.4
G3XDA5	G3XDA5	oprE	Anaerobically-induced outer membrane porin OprE	G3XDA5	G3XDA5_PSEAE	>tr|G3XDA5|G3XDA5_PSEAE Anaerobically-induced outer membrane porin OprE OS=Pseudomonas aeruginosa (strain ATCC 15692 / DSM 22644 / CIP 104116 / JCM 14847 / LMG 12228 / 1C / PRS 101 / PAO1) OX=208964 GN=oprE PE=1 SV=1	49667	2.05558e+06	1.99914e+06	1.99579e+06	2061889	1.98985e+06	1.61254e+06	865136	1.03659e+06	1.14569e+06	699812	868830	16347.9	643811	9566.75	1.82652e+06	15408.3	714897	823334	1.07853e+06	699413	1.75867e+06	1.48697e+06	1087253	1.56094e+06	1.35663e+06	37319	1.29968e+06	2.33108e+06	1.13985e+06	1230213	1.38124e+06	676038	781824	1.44709e+06	293320	549927	1.10716e+06	1.53235e+06	861180
G3XDA6	G3XDA6	ptrB	Repressor, PtrB	G3XDA6	G3XDA6_PSEAE	>tr|G3XDA6|G3XDA6_PSEAE Repressor, PtrB OS=Pseudomonas aeruginosa (strain ATCC 15692 / DSM 22644 / CIP 104116 / JCM 14847 / LMG 12228 / 1C / PRS 101 / PAO1) OX=208964 GN=ptrB PE=4 SV=1	7269.18	605.763	181.988	833.695	698.883	663.968	1578.66	521.093	999.413	NaN	490.242	1246.41	1469.23	499.041	3453.02	3628.51	19182.9	125.021	1.18015	1582.27	NaN	3948.36	871.273	1380.52	38399.6	1993.15	2821.98	NaN	5298.55	415.497	422.878	5442.43	275.301	561.838	7522.91	15110.8	3748.88	144.307	3444.84	128.455
G3XDA7	G3XDA7	ftsQ	Cell division protein FtsQ	G3XDA7	FTSQ_PSEAE	>sp|G3XDA7|FTSQ_PSEAE Cell division protein FtsQ OS=Pseudomonas aeruginosa (strain ATCC 15692 / DSM 22644 / CIP 104116 / JCM 14847 / LMG 12228 / 1C / PRS 101 / PAO1) OX=208964 GN=ftsQ PE=1 SV=1	32250.3	28535	25569.8	21678.9	22172.6	24233.5	43187.9	27166.9	20838.4	27356.9	14354.8	20002.9	26794.1	16630.2	31926.3	52466.8	38022.7	12847.7	9458.81	24671.6	18965.4	27362	31269.6	38694.6	50033.9	36346.6	41881.9	28981.6	46094	25774	31670.5	42067.8	17876.2	31899	54107.6	73620.2	41846	25411.3	42557.7	26427.9
G3XDA8	G3XDA8	pstS	Phosphate-binding protein PstS	G3XDA8	PSTS_PSEAE	>sp|G3XDA8|PSTS_PSEAE Phosphate-binding protein PstS OS=Pseudomonas aeruginosa (strain ATCC 15692 / DSM 22644 / CIP 104116 / JCM 14847 / LMG 12228 / 1C / PRS 101 / PAO1) OX=208964 GN=pstS PE=1 SV=1	34473.6	92790.2	112568	121285	118146	116212	824661	150963	253637	448392	520414	507977	998671	887655	858912	1.7454e+06	72108.9	114970	1797665	1.20746e+06	354133	964537	339718	46855.8	90376.9	59752.4	63141	76377.2	74890	237448	155245	85033.2	80635	139295	45649.9	115802	17752.6	216982	43461.2	58866.3
G3XDB0	G3XDB0	crc	Catabolite repression control protein	G3XDB0	G3XDB0_PSEAE	>tr|G3XDB0|G3XDB0_PSEAE Catabolite repression control protein OS=Pseudomonas aeruginosa (strain ATCC 15692 / DSM 22644 / CIP 104116 / JCM 14847 / LMG 12228 / 1C / PRS 101 / PAO1) OX=208964 GN=crc PE=1 SV=1	29844.7	290521	413855	413306	391845	366125	331030	390230	560271	456196	511269	268970	491074	284517	409748	284949	665910	255709	503071	287610	124431	488405	302522	321132	597302	364742	404147	477356	323292	496849	534218	401366	530677	434387	503241	727771	392736	460226	204777	390944
G3XDB2	G3XDB2	cpoB	Cell division coordinator CpoB	G3XDB2	G3XDB2_PSEAE	>tr|G3XDB2|G3XDB2_PSEAE Cell division coordinator CpoB OS=Pseudomonas aeruginosa (strain ATCC 15692 / DSM 22644 / CIP 104116 / JCM 14847 / LMG 12228 / 1C / PRS 101 / PAO1) OX=208964 GN=cpoB PE=3 SV=1	29097.4	146565	143560	137674	140995	138050	185210	247352	211819	173612	205891	180609	193226	224895	210032	223880	268376	170947	331363	171322	234979	254337	197435	228677	195207	225615	229220	290474	262053	249046	213262	184400	297289	237464	207176	386282	238439	259088	220226	262035
O05927	O05927	cysH	Adenosine 5'-phosphosulfate reductase	O05927	CYSH_PSEAE	>sp|O05927|CYSH_PSEAE Adenosine 5'-phosphosulfate reductase OS=Pseudomonas aeruginosa (strain ATCC 15692 / DSM 22644 / CIP 104116 / JCM 14847 / LMG 12228 / 1C / PRS 101 / PAO1) OX=208964 GN=cysH PE=1 SV=2	30215.3	89125.6	82223.3	74728.3	80565.6	83646	97568.8	81938.7	121443	106383	96345	90997.7	95328	70798.9	89207.2	115140	50412.6	178680	117379	94503.9	83164.9	86429.9	102460	133513	92578.7	97067.6	123077	89921.4	75925.1	117217	77977.7	146413	123696	100683	81682.1	76226.8	77341.7	109718	94263.6	154073
O30506	O30506	aotP	Arginine/ornithine transport ATP-binding protein AotP	O30506	AOTP_PSEAE	>sp|O30506|AOTP_PSEAE Arginine/ornithine transport ATP-binding protein AotP OS=Pseudomonas aeruginosa (strain ATCC 15692 / DSM 22644 / CIP 104116 / JCM 14847 / LMG 12228 / 1C / PRS 101 / PAO1) OX=208964 GN=aotP PE=3 SV=2	27956.3	454114	494323	485480	491900	469432	401172	434616	302490	315826	294827	296303	285194	312447	289726	358936	486665	156308	307724	239055	259838	340643	331100	392144	345694	351185	411142	389176	423293	352011	260136	400042	296684	354076	461274	584459	468750	264717	337210	317007
O30508	O30508	aruC	Succinylornithine transaminase/acetylornithine aminotransferase	O30508	ARUC_PSEAE	>sp|O30508|ARUC_PSEAE Succinylornithine transaminase/acetylornithine aminotransferase OS=Pseudomonas aeruginosa (strain ATCC 15692 / DSM 22644 / CIP 104116 / JCM 14847 / LMG 12228 / 1C / PRS 101 / PAO1) OX=208964 GN=aruC PE=1 SV=2	43747.7	277851	301414	278480	290439	304795	460300	745144	668985	611236	576799	456043	540460	642472	541120	397852	568029	737923	560226	463141	501039	380761	453501	640174	470138	413439	585677	742148	599342	724578	603670	679332	677129	670724	85494.6	586666	784365	618294	585902	581566
O30557	O30557	aroQ1	3-dehydroquinate dehydratase 1	O30557	AROQ1_PSEAE	>sp|O30557|AROQ1_PSEAE 3-dehydroquinate dehydratase 1 OS=Pseudomonas aeruginosa (strain ATCC 15692 / DSM 22644 / CIP 104116 / JCM 14847 / LMG 12228 / 1C / PRS 101 / PAO1) OX=208964 GN=aroQ1 PE=1 SV=1	16234.4	77148	71934.9	74806.4	69557.5	71526.9	83622.6	107735	137162	116014	76810.8	90663.2	77821.5	78003.3	80245.4	92076.7	79135.7	60292	89636.1	67322.1	143814	113524	104426	95313.1	80904.8	105151	100753	109841	87498.5	97035.5	100373	109404	81654.4	106845	110499	75160.3	128560	71994	87198.7	175494
O33407	O33407	estA	Esterase EstA	O33407	ESTA_PSEAE	>sp|O33407|ESTA_PSEAE Esterase EstA OS=Pseudomonas aeruginosa (strain ATCC 15692 / DSM 22644 / CIP 104116 / JCM 14847 / LMG 12228 / 1C / PRS 101 / PAO1) OX=208964 GN=estA PE=1 SV=1	69609	221890	267681	249475	249497	256648	401237	289371	303889	312747	206658	153868	230217	237751	211542	172029	71659.8	87710.2	209548	118817	365827	317829	348544	245113	295060	78285.7	404015	196568	144674	314985	214113	182453	158703	333486	85259.8	132076	93981.9	325012	173119	139700
O33877	O33877	fabA	3-hydroxydecanoyl-[acyl-carrier-protein] dehydratase	O33877	FABA_PSEAE	>sp|O33877|FABA_PSEAE 3-hydroxydecanoyl-[acyl-carrier-protein] dehydratase OS=Pseudomonas aeruginosa (strain ATCC 15692 / DSM 22644 / CIP 104116 / JCM 14847 / LMG 12228 / 1C / PRS 101 / PAO1) OX=208964 GN=fabA PE=1 SV=1	18747.5	346769	536616	545453	524016	533838	636808	728640	662693	597887	665616	288138	663214	606902	636836	524512	1.09258e+06	404492	558969	584218	338105	658904	422534	551189	663647	617306	912034	797246	799624	662221	835171	827247	998898	615389	995811	1.25601e+06	822424	497193	667842	708299
O50174	O50174	astD	N-succinylglutamate 5-semialdehyde dehydrogenase	O50174	ASTD_PSEAE	>sp|O50174|ASTD_PSEAE N-succinylglutamate 5-semialdehyde dehydrogenase OS=Pseudomonas aeruginosa (strain ATCC 15692 / DSM 22644 / CIP 104116 / JCM 14847 / LMG 12228 / 1C / PRS 101 / PAO1) OX=208964 GN=astD PE=1 SV=2	51379.6	97272	114039	109205	110872	97131.2	104627	159169	121011	95747.8	109591	65720.7	109739	111830	100453	70370.7	132069	124855	98730.3	88112.6	71661.6	81640.1	75281.4	130679	111469	85525.6	103716	138914	126797	111483	89104.1	126430	94589.4	149320	117564	97744.3	204784	105549	82823.7	100571
O50175	O50175	astB	N-succinylarginine dihydrolase	O50175	ASTB_PSEAE	>sp|O50175|ASTB_PSEAE N-succinylarginine dihydrolase OS=Pseudomonas aeruginosa (strain ATCC 15692 / DSM 22644 / CIP 104116 / JCM 14847 / LMG 12228 / 1C / PRS 101 / PAO1) OX=208964 GN=astB PE=3 SV=1	48875	141097	179498	171236	182018	180206	161654	241194	185559	175908	184030	152488	189023	196892	186538	119505	211520	198717	163792	138558	143679	147273	154621	222994	154220	126843	172931	247991	212947	227770	168694	237570	181152	245324	242291	189207	326906	189343	159893	195415
O50177	O50177	astE	Succinylglutamate desuccinylase	O50177	ASTE_PSEAE	>sp|O50177|ASTE_PSEAE Succinylglutamate desuccinylase OS=Pseudomonas aeruginosa (strain ATCC 15692 / DSM 22644 / CIP 104116 / JCM 14847 / LMG 12228 / 1C / PRS 101 / PAO1) OX=208964 GN=astE PE=3 SV=1	36908.9	32939.4	31483.2	30311.2	31070.2	32775.6	46317.8	68692.9	79397.4	69789.3	67497.7	48245.3	62520.5	52745.5	49583.1	32369.5	43408.8	75867.8	68310.9	41505.7	40525.6	63975.6	51934	56510.4	53997.9	37687.8	39517.8	69898.7	48840.2	72427.5	62567.3	50830.3	61188.7	68901.7	35887.1	64436.6	66012.4	56890.7	34640.3	63895.2
O50273	O50273	cysD	Sulfate adenylyltransferase subunit 2	O50273	CYSD_PSEAE	>sp|O50273|CYSD_PSEAE Sulfate adenylyltransferase subunit 2 OS=Pseudomonas aeruginosa (strain ATCC 15692 / DSM 22644 / CIP 104116 / JCM 14847 / LMG 12228 / 1C / PRS 101 / PAO1) OX=208964 GN=cysD PE=3 SV=1	35478.6	64737.6	65415.4	68696.6	72265.1	77769.5	142336	57989.1	96745.4	57714.8	90093.8	85859.9	89863	89829.8	83550.2	107624	50809.3	113438	37199.9	80250.6	46897.1	32338.9	63620.1	143550	99230.3	100523	97252.1	51796.9	35157.8	77489.9	44903.1	143771	54994.8	114820	67556.3	51216.3	75805.1	49872.1	91245.3	186387
O50274	O50274	cysNC	Bifunctional enzyme CysN/CysC	O50274	CYSNC_PSEAE	>sp|O50274|CYSNC_PSEAE Bifunctional enzyme CysN/CysC OS=Pseudomonas aeruginosa (strain ATCC 15692 / DSM 22644 / CIP 104116 / JCM 14847 / LMG 12228 / 1C / PRS 101 / PAO1) OX=208964 GN=cysNC PE=3 SV=1	69268.5	337073	371282	380159	374996	388175	706248	316326	468011	319389	471618	399305	470490	477837	461688	653809	258229	825358	229645	581286	272543	202792	355232	770448	506024	500630	513397	266694	181677	407545	215254	743782	328965	652819	341332	266213	504957	287550	590172	952831
O52658	O52658	acpP2	Acyl carrier protein 2	O52658	ACP2_PSEAE	>sp|O52658|ACP2_PSEAE Acyl carrier protein 2 OS=Pseudomonas aeruginosa (strain ATCC 15692 / DSM 22644 / CIP 104116 / JCM 14847 / LMG 12228 / 1C / PRS 101 / PAO1) OX=208964 GN=acpP2 PE=3 SV=1	8950.93	5931.73	3151.48	12307.2	22256.2	4574.56	2950.68	5663.1	1371.05	14127.6	5807.42	1503.96	3298.9	5031.31	6956.22	2282.06	6265.89	17627	1861.05	13731.2	2766.21	3106.75	20556.4	21796.5	6616.41	3271.12	11811.1	25660.7	18409.4	35342.3	34164.4	14762.9	30594.8	11604.1	1704.76	2552.81	1951.8	32124	7573.56	6005.94
O52759	O52759	rpsD	Small ribosomal subunit protein uS4	O52759	RS4_PSEAE	>sp|O52759|RS4_PSEAE Small ribosomal subunit protein uS4 OS=Pseudomonas aeruginosa (strain ATCC 15692 / DSM 22644 / CIP 104116 / JCM 14847 / LMG 12228 / 1C / PRS 101 / PAO1) OX=208964 GN=rpsD PE=1 SV=2	23277.6	5.62342e+06	6122233	5664280	6046061	6.48847e+06	6090587	5.82977e+06	4.88614e+06	5.96975e+06	4.52366e+06	4.76858e+06	5.87854e+06	4.25444e+06	5275824	7757511	8.11125e+06	3.98495e+06	4299437	4504383	4402178	4342730	4.80791e+06	5.44529e+06	5.77335e+06	6192280	5409133	5995912	7.04111e+06	5553242	6.10991e+06	6.71099e+06	4969151	5.06455e+06	8764526	11010510	7022342	5165224	5314363	5601905
O52760	O52760	rpoA	DNA-directed RNA polymerase subunit alpha	O52760	RPOA_PSEAE	>sp|O52760|RPOA_PSEAE DNA-directed RNA polymerase subunit alpha OS=Pseudomonas aeruginosa (strain ATCC 15692 / DSM 22644 / CIP 104116 / JCM 14847 / LMG 12228 / 1C / PRS 101 / PAO1) OX=208964 GN=rpoA PE=1 SV=2	36649.6	2454369	2654458	2.60554e+06	2562300	2.81094e+06	3.12824e+06	3.04305e+06	2805046	2.81094e+06	2632524	2507051	2.35585e+06	2.52546e+06	2.55288e+06	3.64756e+06	3.32392e+06	2.08967e+06	2779465	2.49418e+06	1.94698e+06	3.05037e+06	2.86732e+06	2.86815e+06	3200977	3.06443e+06	3001129	3.64862e+06	3.35057e+06	3.29888e+06	3.16882e+06	3.30183e+06	2.88261e+06	3.01575e+06	3.88262e+06	4.25725e+06	3.73847e+06	3.10484e+06	3.12472e+06	2.92275e+06
O52761	O52761	rplQ	Large ribosomal subunit protein bL17	O52761	RL17_PSEAE	>sp|O52761|RL17_PSEAE Large ribosomal subunit protein bL17 OS=Pseudomonas aeruginosa (strain ATCC 15692 / DSM 22644 / CIP 104116 / JCM 14847 / LMG 12228 / 1C / PRS 101 / PAO1) OX=208964 GN=rplQ PE=1 SV=1	14503.8	2.54183e+06	2.67515e+06	2.29099e+06	2523944	2.28448e+06	3.58204e+06	2.05317e+06	1.8395e+06	3.26733e+06	1.78274e+06	419694	3111556	1328781	2.70565e+06	4.03972e+06	2407748	1.78932e+06	353496	1.36302e+06	479311	746495	939397	1478604	2.22732e+06	2.52898e+06	2642421	2.87545e+06	2.60635e+06	4.24207e+06	2603494	3329146	2.13538e+06	2159212	3246345	6.74057e+06	3.35944e+06	2.66929e+06	2602897	1.50344e+06
O52762	O52762	katA	Catalase A	O52762	CATA_PSEAE	>sp|O52762|CATA_PSEAE Catalase A OS=Pseudomonas aeruginosa (strain ATCC 15692 / DSM 22644 / CIP 104116 / JCM 14847 / LMG 12228 / 1C / PRS 101 / PAO1) OX=208964 GN=katA PE=1 SV=1	55589.2	401497	494791	455387	458374	493108	583364	1.02146e+06	1.12937e+06	1.44015e+06	823615	328491	762803	670632	530677	214119	203179	813598	1.0188e+06	332496	937967	762577	837980	819620	467168	420892	772937	853102	584488	1.23068e+06	1.15798e+06	785850	1362020	975557	275970	145131	360861	1.06873e+06	587742	687214
O54438	O54438	fabG	3-oxoacyl-[acyl-carrier-protein] reductase FabG	O54438	FABG_PSEAE	>sp|O54438|FABG_PSEAE 3-oxoacyl-[acyl-carrier-protein] reductase FabG OS=Pseudomonas aeruginosa (strain ATCC 15692 / DSM 22644 / CIP 104116 / JCM 14847 / LMG 12228 / 1C / PRS 101 / PAO1) OX=208964 GN=fabG PE=1 SV=1	25585.3	993087	989693	1.00328e+06	1.00701e+06	967101	988914	1.39372e+06	1.31286e+06	1.1607e+06	1.35355e+06	1.19166e+06	1.32042e+06	1.20931e+06	1.31493e+06	1.21834e+06	2.05546e+06	1.31924e+06	1.30143e+06	1.04534e+06	1.11816e+06	1.25188e+06	1.48006e+06	1.44477e+06	898321	1.04812e+06	1.27363e+06	1.4605e+06	1.47394e+06	1.50331e+06	1.64414e+06	1.51774e+06	2.00101e+06	1.43816e+06	1.52945e+06	1.90004e+06	1.93213e+06	1.37939e+06	1.51517e+06	1.21964e+06
O54439	O54439	acpP1	Acyl carrier protein 1	O54439	ACP1_PSEAE	>sp|O54439|ACP1_PSEAE Acyl carrier protein 1 OS=Pseudomonas aeruginosa (strain ATCC 15692 / DSM 22644 / CIP 104116 / JCM 14847 / LMG 12228 / 1C / PRS 101 / PAO1) OX=208964 GN=acpP1 PE=3 SV=4	8740.7	1.12517e+06	1.37444e+06	1.4393e+06	1.50546e+06	1.60602e+06	1.77263e+06	2.10519e+06	2.18732e+06	1.81667e+06	1.94228e+06	1.40861e+06	1.91291e+06	1.64513e+06	1.87873e+06	1.66712e+06	3.58101e+06	1.06551e+06	2.03789e+06	1.53007e+06	1.15979e+06	2.11447e+06	1.03467e+06	1.61995e+06	2.03268e+06	1.69346e+06	1.80821e+06	2.2999e+06	2.01993e+06	2.31521e+06	3.4439e+06	2366524	3205548	1.46108e+06	2419268	3.46576e+06	2.2592e+06	2.09404e+06	1.36752e+06	1.38705e+06
O68281	O68281	hexR	HTH-type transcriptional regulator HexR	O68281	HEXR_PSEAE	>sp|O68281|HEXR_PSEAE HTH-type transcriptional regulator HexR OS=Pseudomonas aeruginosa (strain ATCC 15692 / DSM 22644 / CIP 104116 / JCM 14847 / LMG 12228 / 1C / PRS 101 / PAO1) OX=208964 GN=hexR PE=3 SV=2	31169.8	66263.8	86529.6	79062.3	81475.5	90653.4	130711	129200	123375	109169	117109	77049	94672.2	117908	79997.3	114026	87200.8	118451	156190	102730	82052.6	102005	101227	96040.3	127479	95550	131714	105324	91623	138050	112615	122202	142909	102199	97487.8	128042	143449	132391	83254.8	93371.6
O68282	O68282	zwf	Glucose-6-phosphate 1-dehydrogenase	O68282	G6PD_PSEAE	>sp|O68282|G6PD_PSEAE Glucose-6-phosphate 1-dehydrogenase OS=Pseudomonas aeruginosa (strain ATCC 15692 / DSM 22644 / CIP 104116 / JCM 14847 / LMG 12228 / 1C / PRS 101 / PAO1) OX=208964 GN=zwf PE=1 SV=1	55620.4	234842	229228	227545	234631	240922	382540	492084	402186	433791	394146	347160	374578	428065	378829	695487	93498.3	514283	321020	476008	454930	267718	384376	310396	115089	89493.4	238969	395478	108757	368504	376102	288490	331527	352203	96046.6	87881.4	645813	301046	127746	316410
O68283	O68283	eda	2-dehydro-3-deoxy-phosphogluconate aldolase	O68283	ALKD_PSEAE	>sp|O68283|ALKD_PSEAE 2-dehydro-3-deoxy-phosphogluconate aldolase OS=Pseudomonas aeruginosa (strain ATCC 15692 / DSM 22644 / CIP 104116 / JCM 14847 / LMG 12228 / 1C / PRS 101 / PAO1) OX=208964 GN=eda PE=3 SV=2	23953.7	48672	72115.3	66452.1	56544.4	56811.4	82059.7	210422	139881	184846	132952	45036.8	106234	117768	107238	155590	44428.6	150185	127407	128159	68503.1	79562.4	76858.5	124387	41969.2	50936.1	147388	181447	24988.2	180055	139105	107997	193624	177207	29434.8	43017	213544	150845	29146.9	117044
O68560	O68560	ratA	Ribosome association toxin RatA	O68560	RATA_PSEAE	>sp|O68560|RATA_PSEAE Ribosome association toxin RatA OS=Pseudomonas aeruginosa (strain ATCC 15692 / DSM 22644 / CIP 104116 / JCM 14847 / LMG 12228 / 1C / PRS 101 / PAO1) OX=208964 GN=ratA PE=3 SV=1	16000.5	37072.8	53097.2	56622.9	46772	36167.2	31962.3	35067.5	39285.7	38229.4	52238.9	36131.5	27868.5	45034	45196.4	35336.6	67506.3	59842.2	78923.3	59238.6	47866.1	43210.2	45589.8	39117.5	38921	32387.3	35579.7	45011.4	38111.4	53174.4	43513.2	33371.5	61532.5	32870.6	28118.7	35370.7	36701.5	40002.6	33180.6	36319.8
O68561	O68561	PA4766	UPF0125 protein PA4766	O68561	YOM2_PSEAE	>sp|O68561|YOM2_PSEAE UPF0125 protein PA4766 OS=Pseudomonas aeruginosa (strain ATCC 15692 / DSM 22644 / CIP 104116 / JCM 14847 / LMG 12228 / 1C / PRS 101 / PAO1) OX=208964 GN=PA4766 PE=3 SV=1	10949.7	22094.9	19185.1	17543.6	18305.1	16379.5	16065	17411.8	20012.6	15120.9	12607.2	12393.3	17251.9	15814.9	16471.8	23449.1	24411.1	15605.4	1399.51	17850.9	18426	20274.2	13252.8	16773.3	22191.4	18032.6	12537.4	10728.1	18168.5	19607.8	18850.6	13000.1	26528.1	17290.2	20188.4	5879.18	17547.3	13327	13820.6	16065
O68562	O68562	bamE	Outer membrane protein assembly factor BamE	O68562	BAME_PSEAE	>sp|O68562|BAME_PSEAE Outer membrane protein assembly factor BamE OS=Pseudomonas aeruginosa (strain ATCC 15692 / DSM 22644 / CIP 104116 / JCM 14847 / LMG 12228 / 1C / PRS 101 / PAO1) OX=208964 GN=bamE PE=1 SV=1	19394.9	86304.6	99259.8	109126	103532	104191	102136	73939.6	87459.6	83853.8	71815.7	72030.9	98051.8	68083.4	75570.9	93546.8	85157.8	86332.8	44989	72758.8	52005.6	49999	68823.3	72221.1	109554	98337.3	91817.1	91300	91318.6	82546.4	97405.6	106942	91515.6	77930.5	112099	109436	77448.9	81897.4	64249.5	77791.2
O68799	O68799	mobA	Molybdenum cofactor guanylyltransferase	O68799	MOBA_PSEAE	>sp|O68799|MOBA_PSEAE Molybdenum cofactor guanylyltransferase OS=Pseudomonas aeruginosa (strain ATCC 15692 / DSM 22644 / CIP 104116 / JCM 14847 / LMG 12228 / 1C / PRS 101 / PAO1) OX=208964 GN=mobA PE=3 SV=1	21870.3	15068.2	22458.6	20836	22504.2	26392.7	34707.5	21699.6	36134.8	29864.7	19661.8	4896.13	15752.9	10582.5	14387.2	11774.2	17559.7	21074.6	12338.4	20192.6	7.81215	17530.5	8031.86	22599.4	28750.1	22255.6	24000.8	27826.4	11122.4	24188.5	36728.4	26652.7	24313.3	11376	17306.4	16489.5	16051.8	16821.8	11546	20343
O68822	O68822	pepA	Cytosol aminopeptidase	O68822	AMPA_PSEAE	>sp|O68822|AMPA_PSEAE Cytosol aminopeptidase OS=Pseudomonas aeruginosa (strain ATCC 15692 / DSM 22644 / CIP 104116 / JCM 14847 / LMG 12228 / 1C / PRS 101 / PAO1) OX=208964 GN=pepA PE=3 SV=1	52331.5	625561	719730	685493	716857	748864	1.02373e+06	693222	625364	1.05725e+06	743038	685160	770576	705173	675296	767489	539539	980031	925408	678883	437313	1.20534e+06	733711	684758	776466	648678	703578	687203	599553	834609	824082	600682	752812	646960	624620	707804	625111	809404	523403	631463
O68823	O68823	holC	DNA polymerase III subunit chi	O68823	HOLC_PSEAE	>sp|O68823|HOLC_PSEAE DNA polymerase III subunit chi OS=Pseudomonas aeruginosa (strain ATCC 15692 / DSM 22644 / CIP 104116 / JCM 14847 / LMG 12228 / 1C / PRS 101 / PAO1) OX=208964 GN=holC PE=3 SV=1	16141.3	74662	62968.9	77941.1	71777.6	63051.2	48016.5	52365.9	53701.5	53369.1	54491.2	50207.8	27726.1	64667.2	48546.8	56438.2	55181.5	50172.6	44791.4	57896.8	57799.4	54054.3	59420.9	76524.5	81525.8	69127.5	51930.9	76885.7	51263.6	59863.8	67106.9	60341	73212.4	50828.8	79288	47336.3	63497	76444.4	65909.7	61343.6
O68877	O68877	hmuV	Hemin import ATP-binding protein HmuV	O68877	HMUV_PSEAE	>sp|O68877|HMUV_PSEAE Hemin import ATP-binding protein HmuV OS=Pseudomonas aeruginosa (strain ATCC 15692 / DSM 22644 / CIP 104116 / JCM 14847 / LMG 12228 / 1C / PRS 101 / PAO1) OX=208964 GN=hmuV PE=3 SV=1	27524.7	39458.4	29327.8	30410.1	30324	27239	35631	19005	24000.4	24593.4	21836.4	25232.8	15871.6	36020.3	21367.4	42754.5	26675.6	17740.6	15249.7	23274.1	1535.13	16972.9	12058.3	22853	34410.5	22991.9	36075.7	20415.5	17901	13484.6	21484.6	24944.2	17453.8	35181.1	21186.4	25753.1	17393	11932.7	28580.9	38357.7
O69077	O69077	lysC	Aspartokinase	O69077	AK_PSEAE	>sp|O69077|AK_PSEAE Aspartokinase OS=Pseudomonas aeruginosa (strain ATCC 15692 / DSM 22644 / CIP 104116 / JCM 14847 / LMG 12228 / 1C / PRS 101 / PAO1) OX=208964 GN=lysC PE=1 SV=2	44388.8	393663	520497	509060	510650	506401	529192	906722	674388	666656	679354	508162	757705	587932	665759	784336	868162	763989	678604	685413	315639	566501	588919	628451	664315	612808	734885	942312	644077	778144	825265	854974	760462	764147	725948	864826	496090	755551	666531	726409
O69078	O69078	csrA	Translational regulator CsrA	O69078	CSRA_PSEAE	>sp|O69078|CSRA_PSEAE Translational regulator CsrA OS=Pseudomonas aeruginosa (strain ATCC 15692 / DSM 22644 / CIP 104116 / JCM 14847 / LMG 12228 / 1C / PRS 101 / PAO1) OX=208964 GN=csrA PE=1 SV=1	6908.95	89824	97224	107668	112034	85741.4	121589	192016	228253	180876	233355	110309	162768	192498	165839	122142	196849	154779	286362	83659.3	200075	314498	223633	206935	196147	248804	163925	211377	174541	252830	211298	114334	323002	244015	126167	389774	174563	294499	161008	190548
O69753	O69753	phzB1	Phenazine biosynthesis protein PhzB1	O69753	PHZB1_PSEAE	>sp|O69753|PHZB1_PSEAE Phenazine biosynthesis protein PhzB1 OS=Pseudomonas aeruginosa (strain ATCC 15692 / DSM 22644 / CIP 104116 / JCM 14847 / LMG 12228 / 1C / PRS 101 / PAO1) OX=208964 GN=phzB1 PE=2 SV=1	18888.3	583458	630205	650616	597219	616069	702111	515081	213361	137001	234794	3199.16	131904	222744	176530	31219.1	24489.2	885578	12925.7	86259.4	606429	10900.8	29241.9	6932.87	916353	196034	573838	247473	342045	174250	228488	398018	130149	199132	4903.36	8258.29	226847	127973	548722	121583
O69754	O69754	phzF1	Trans-2,3-dihydro-3-hydroxyanthranilate isomerase	O69754	PHZF_PSEAE	>sp|O69754|PHZF_PSEAE Trans-2,3-dihydro-3-hydroxyanthranilate isomerase OS=Pseudomonas aeruginosa (strain ATCC 15692 / DSM 22644 / CIP 104116 / JCM 14847 / LMG 12228 / 1C / PRS 101 / PAO1) OX=208964 GN=phzF1 PE=3 SV=2	30342.5	330396	509333	419759	526684	482910	1.26191e+06	1.74815e+06	814579	468946	445528	2663.52	262359	298543	206741	7437.01	40487.7	781885	3905.86	61269.1	85900.2	2904.75	5723.86	2686709	2.02532e+06	545391	2.03323e+06	1.37696e+06	820455	561170	942347	886302	607396	1.81437e+06	2374.61	49959.4	968843	353880	569822	653186
O82850	O82850	rpsB	Small ribosomal subunit protein uS2	O82850	RS2_PSEAE	>sp|O82850|RS2_PSEAE Small ribosomal subunit protein uS2 OS=Pseudomonas aeruginosa (strain ATCC 15692 / DSM 22644 / CIP 104116 / JCM 14847 / LMG 12228 / 1C / PRS 101 / PAO1) OX=208964 GN=rpsB PE=1 SV=2	27336.4	1.99464e+06	3.07608e+06	2.63674e+06	3.33692e+06	3.5574e+06	2.93978e+06	2407351	2172811	3.26296e+06	1973748	642974	2.55784e+06	1.35547e+06	2.40281e+06	2.94274e+06	3.64591e+06	1.71483e+06	1.18357e+06	1.49206e+06	121813	1.26247e+06	1.95304e+06	1.96666e+06	2.48811e+06	2.74045e+06	2.56745e+06	3.17033e+06	1.84396e+06	3.45292e+06	3.0785e+06	3.42103e+06	2219214	2.02211e+06	3.44195e+06	5.94069e+06	3.02722e+06	2287901	2.09973e+06	1.72046e+06
O82851	O82851	tsf	Elongation factor Ts	O82851	EFTS_PSEAE	>sp|O82851|EFTS_PSEAE Elongation factor Ts OS=Pseudomonas aeruginosa (strain ATCC 15692 / DSM 22644 / CIP 104116 / JCM 14847 / LMG 12228 / 1C / PRS 101 / PAO1) OX=208964 GN=tsf PE=3 SV=1	30653.2	3.4096e+06	3.51775e+06	3.57754e+06	3560143	3.50642e+06	3.37791e+06	6018864	5430506	4925064	6368311	4685904	5503438	6601587	6341829	6347325	10002572	4.42338e+06	6025227	6.50255e+06	6.16505e+06	5213888	5.94972e+06	5877720	5.34067e+06	5407148	6.01858e+06	7700706	8.2237e+06	7482821	7800265	7257838	7.16655e+06	6694195	9368844	10076411	8675090	7.0224e+06	6837321	6.50933e+06
O82852	O82852	pyrH	Uridylate kinase	O82852	PYRH_PSEAE	>sp|O82852|PYRH_PSEAE Uridylate kinase OS=Pseudomonas aeruginosa (strain ATCC 15692 / DSM 22644 / CIP 104116 / JCM 14847 / LMG 12228 / 1C / PRS 101 / PAO1) OX=208964 GN=pyrH PE=3 SV=2	26272.5	215049	226581	219465	233431	216923	228523	253513	225629	195837	263371	255885	227835	266163	239694	235048	307453	221961	275122	242104	342421	213094	243818	278614	200932	235929	248628	243443	299138	263622	267740	268985	269222	266585	318204	428347	362462	263522	269932	281053
O82853	O82853	frr	Ribosome-recycling factor	O82853	RRF_PSEAE	>sp|O82853|RRF_PSEAE Ribosome-recycling factor OS=Pseudomonas aeruginosa (strain ATCC 15692 / DSM 22644 / CIP 104116 / JCM 14847 / LMG 12228 / 1C / PRS 101 / PAO1) OX=208964 GN=frr PE=3 SV=1	20485.4	339976	332803	315026	320028	325128	323659	492778	606455	485088	701428	413621	534862	604362	547210	369560	645191	505738	607399	521320	625476	531988	383732	422970	460371	409637	428121	556168	607600	638730	691858	461485	796150	439493	360597	647959	476033	607996	400155	460797
O85732	O85732	fmt	Methionyl-tRNA formyltransferase	O85732	FMT_PSEAE	>sp|O85732|FMT_PSEAE Methionyl-tRNA formyltransferase OS=Pseudomonas aeruginosa (strain ATCC 15692 / DSM 22644 / CIP 104116 / JCM 14847 / LMG 12228 / 1C / PRS 101 / PAO1) OX=208964 GN=fmt PE=1 SV=1	33028.1	43167.8	86310.7	78586.1	77529.3	72039.2	56607.9	71194.8	64831.7	62105.8	62274.5	20617.1	51934.6	39601.2	46371.1	42021.8	86161.9	36506.7	60217.4	43067.2	24002.9	63262.1	39425.9	59946	74186	74412.8	75558.4	68946.9	33135.3	67908.7	64941	62961.7	50810	69234.8	61448.3	54816.3	91812.8	53895	32689.6	48293
O86062	O86062	nudC	NAD-capped RNA hydrolase NudC	O86062	NUDC_PSEAE	>sp|O86062|NUDC_PSEAE NAD-capped RNA hydrolase NudC OS=Pseudomonas aeruginosa (strain ATCC 15692 / DSM 22644 / CIP 104116 / JCM 14847 / LMG 12228 / 1C / PRS 101 / PAO1) OX=208964 GN=nudC PE=3 SV=2	31355.7	22966.3	28017.2	25704.8	23465.5	28744.2	42379.9	52721.2	55539.6	34792.3	41488.9	27667.5	38730.9	24563.8	28490.3	43512.8	28477.6	23779.2	47760.2	37806.1	11324.1	57044.5	34853.7	33606.9	52196.7	26541.8	56262.4	48767.6	52712.3	49103.3	47748.8	44683.3	65907.6	58112.4	44614.1	23619	27938.1	55983.5	29953.2	41367.4
O86428	O86428	ilvE	Branched-chain-amino-acid aminotransferase	O86428	ILVE_PSEAE	>sp|O86428|ILVE_PSEAE Branched-chain-amino-acid aminotransferase OS=Pseudomonas aeruginosa (strain ATCC 15692 / DSM 22644 / CIP 104116 / JCM 14847 / LMG 12228 / 1C / PRS 101 / PAO1) OX=208964 GN=ilvE PE=1 SV=2	34084.6	886060	1.54733e+06	1.12675e+06	1751778	1.59442e+06	1.94644e+06	2.65668e+06	4313539	5065815	2.65803e+06	967449	2.94127e+06	1.2182e+06	1682616	1104711	931904	1.82289e+06	2.10016e+06	1.00343e+06	386214	1.89251e+06	1.4956e+06	1760645	1.4648e+06	1.12422e+06	1627353	2816410	734280	4.1055e+06	3.09409e+06	1.64521e+06	3.84971e+06	2.07741e+06	1.19691e+06	2.34551e+06	1.53219e+06	3.68126e+06	1.04076e+06	1.93097e+06
O87014	O87014	usg	USG-1 protein homolog	O87014	USG_PSEAE	>sp|O87014|USG_PSEAE USG-1 protein homolog OS=Pseudomonas aeruginosa (strain ATCC 15692 / DSM 22644 / CIP 104116 / JCM 14847 / LMG 12228 / 1C / PRS 101 / PAO1) OX=208964 GN=usg PE=1 SV=2	35349.4	14529.2	16254.6	10992.1	19318.3	11540.5	9147.14	11850.1	8529.89	11933.9	22736.7	8774.18	15748.6	10985.9	16724.7	10730.4	29441.9	13000.3	14839.7	10863.2	2510.41	18594.9	6548.13	7328.95	18233.4	13943.4	15911	14782.3	10590.2	21944.4	20831.7	14928	13707.5	16848.4	8689.33	23533.3	13800.3	15204.2	11209.7	6105.36
O87016	O87016	truA	tRNA pseudouridine synthase A	O87016	TRUA_PSEAE	>sp|O87016|TRUA_PSEAE tRNA pseudouridine synthase A OS=Pseudomonas aeruginosa (strain ATCC 15692 / DSM 22644 / CIP 104116 / JCM 14847 / LMG 12228 / 1C / PRS 101 / PAO1) OX=208964 GN=truA PE=3 SV=1	31483.1	92850.4	101028	102820	112788	124993	86594.7	80939.3	82253.9	72699.1	66352.7	79572.2	86631.5	69610.7	62237	123664	93284.7	72383.4	95394.6	81987.5	69482.9	98164.3	140596	110552	96291	71123.6	76463.2	99743.2	91174.8	89253.6	85855.2	108658	77654	74203.7	136758	50958	93320.4	88542.1	81959.9	9278.69
O87125	O87125	cheB1	Protein-glutamate methylesterase/protein-glutamine glutaminase 1	O87125	CHEB1_PSEAE	>sp|O87125|CHEB1_PSEAE Protein-glutamate methylesterase/protein-glutamine glutaminase 1 OS=Pseudomonas aeruginosa (strain ATCC 15692 / DSM 22644 / CIP 104116 / JCM 14847 / LMG 12228 / 1C / PRS 101 / PAO1) OX=208964 GN=cheB1 PE=1 SV=2	39004	297302	298773	293735	293731	294244	226807	210688	216894	249088	200708	170328	246017	208790	219739	153710	150918	184456	228384	181124	192587	246219	206158	199219	202266	187531	208943	227028	144174	217776	196880	133897	214373	201933	125277	61274.5	120445	196442	180225	231147
O87131	O87131	cheR1	Chemotaxis protein methyltransferase 1	O87131	CHER1_PSEAE	>sp|O87131|CHER1_PSEAE Chemotaxis protein methyltransferase 1 OS=Pseudomonas aeruginosa (strain ATCC 15692 / DSM 22644 / CIP 104116 / JCM 14847 / LMG 12228 / 1C / PRS 101 / PAO1) OX=208964 GN=cheR1 PE=1 SV=1	30647.5	193015	186432	177788	191109	178560	166774	152466	171932	198680	154038	113073	162835	151221	142730	117076	88030.9	211826	228334	128738	128496	161536	137378	151706	129508	117904	131732	155937	117814	202762	168705	105890	189064	172454	71861.6	80469	121503	186261	171316	187059
P00099	P00099	nirM	Cytochrome c-551	P00099	CY551_PSEAE	>sp|P00099|CY551_PSEAE Cytochrome c-551 OS=Pseudomonas aeruginosa (strain ATCC 15692 / DSM 22644 / CIP 104116 / JCM 14847 / LMG 12228 / 1C / PRS 101 / PAO1) OX=208964 GN=nirM PE=1 SV=2	10966.7	20710	23631.7	20981.1	21679.2	20917.8	14458.9	9832.69	25250.7	20721.6	22281.5	27551.6	33072.6	30156.1	46078.1	41311.1	80075.7	29869.1	44945.2	53701.3	41320.4	17846.4	14228.7	11707.6	3138.65	31905.5	23838.3	21832.2	71657.8	26237.5	30481.7	27015.8	70508.1	15968.3	39304.6	7582.39	3289.49	13293.5	44864.5	5890.47
P00106	P00106	cc4	Cytochrome c4	P00106	CYC4_PSEAE	>sp|P00106|CYC4_PSEAE Cytochrome c4 OS=Pseudomonas aeruginosa (strain ATCC 15692 / DSM 22644 / CIP 104116 / JCM 14847 / LMG 12228 / 1C / PRS 101 / PAO1) OX=208964 GN=cc4 PE=1 SV=3	20734.7	829509	907290	848339	916799	792293	677170	322161	511587	539429	361830	202911	404559	329006	447547	599382	420423	364044	219518	304465	115862	594628	324500	247282	295311	623872	550347	336404	371810	417581	325971	388043	470102	340337	359913	614461	320070	360157	421427	343743
P00282	P00282	azu	Azurin	P00282	AZUR_PSEAE	>sp|P00282|AZUR_PSEAE Azurin OS=Pseudomonas aeruginosa (strain ATCC 15692 / DSM 22644 / CIP 104116 / JCM 14847 / LMG 12228 / 1C / PRS 101 / PAO1) OX=208964 GN=azu PE=1 SV=2	16008.4	706706	2.21113e+06	2.08011e+06	2.3701e+06	2.05734e+06	1.11829e+06	1.54123e+06	4694052	4.69979e+06	2.67079e+06	574521	2.98923e+06	2387678	1.81632e+06	690688	2.40203e+06	641861	6.16684e+06	748475	815455	2.66021e+06	556381	1.10725e+06	1.40678e+06	1.46851e+06	1.42986e+06	2.10516e+06	1.23243e+06	2.75596e+06	3164525	1.99735e+06	5.73001e+06	2.05559e+06	1.04406e+06	1422555	523689	1.07446e+06	458732	1.01953e+06
P04739	P04739	pilA	Type IV major pilin protein PilA	P04739	PILA_PSEAE	>sp|P04739|PILA_PSEAE Type IV major pilin protein PilA OS=Pseudomonas aeruginosa (strain ATCC 15692 / DSM 22644 / CIP 104116 / JCM 14847 / LMG 12228 / 1C / PRS 101 / PAO1) OX=208964 GN=pilA PE=1 SV=1	15511.8	915.9	1380.69	2419.65	3715.39	559.494	923.808	14197811	21928006	1791.91	NaN	865.805	1052.56	2767.18	614.736	2286.72	5344.8	829.706	21071852	1156.01	1224.36	3678.37	2697.89	146.192	398.05	3525.96	27939512	25341254	193.209	16853298	22567652	320.362	8098.28	13000231	5128.89	4.15836e+06	5103200	1264.29	1494.23	970.117
P05384	P05384	hupB	DNA-binding protein HU-beta	P05384	DBHB_PSEAE	>sp|P05384|DBHB_PSEAE DNA-binding protein HU-beta OS=Pseudomonas aeruginosa (strain ATCC 15692 / DSM 22644 / CIP 104116 / JCM 14847 / LMG 12228 / 1C / PRS 101 / PAO1) OX=208964 GN=hupB PE=1 SV=3	9086.59	7437234	8822842	8819648	8571446	8556124	7.30249e+06	9705480	8121113	7.48694e+06	8965470	8.08325e+06	9156305	9289977	9345581	8845669	9044387	12464216	15794491	8.34858e+06	16587333	13807092	7.71171e+06	9618938	7.04228e+06	12199438	10492118	9170760	9005692	9036827	9546360	9039564	12837788	10716811	9224538	16694228	11112520	9351595	8.01397e+06	8462510
P07344	P07344	trpA	Tryptophan synthase alpha chain	P07344	TRPA_PSEAE	>sp|P07344|TRPA_PSEAE Tryptophan synthase alpha chain OS=Pseudomonas aeruginosa (strain ATCC 15692 / DSM 22644 / CIP 104116 / JCM 14847 / LMG 12228 / 1C / PRS 101 / PAO1) OX=208964 GN=trpA PE=3 SV=3	28488.4	140356	106760	105642	115607	125884	102038	169693	85931.8	98322.4	191441	175478	146638	188420	185934	168709	100083	198410	82595.5	92847.2	177410	148260	158069	149754	169436	119896	110057	119490	97160.9	142195	88218.1	108919	124425	92910	90474.9	121967	74711.8	187683	130123	125020
P07345	P07345	trpB	Tryptophan synthase beta chain	P07345	TRPB_PSEAE	>sp|P07345|TRPB_PSEAE Tryptophan synthase beta chain OS=Pseudomonas aeruginosa (strain ATCC 15692 / DSM 22644 / CIP 104116 / JCM 14847 / LMG 12228 / 1C / PRS 101 / PAO1) OX=208964 GN=trpB PE=3 SV=2	43680.7	25144.2	26242.8	26534.7	27287.9	28215	31802.3	52882.2	46130.4	36845.8	54712.2	49422.9	46227.2	60195.1	51726.2	50111.2	35221.2	67724.7	39785.5	30129.6	38379.9	51115.1	42446.2	43378.2	56938.6	37452.7	35552.6	38669	29598.4	33956.2	31551.3	39685.1	33027.2	26702.4	41568.8	46135.3	23566.6	41743.8	35121.5	42252.7
P07874	P07874	algA	Alginate biosynthesis protein AlgA	P07874	ALGA_PSEAE	>sp|P07874|ALGA_PSEAE Alginate biosynthesis protein AlgA OS=Pseudomonas aeruginosa (strain ATCC 15692 / DSM 22644 / CIP 104116 / JCM 14847 / LMG 12228 / 1C / PRS 101 / PAO1) OX=208964 GN=algA PE=1 SV=3	53128.2	9407.16	4084.28	3012.21	4851.77	4312.37	2169.56	1676.02	2206.01	1728.14	3297.13	1837.77	4702.84	2587.64	2062.35	1830.69	5604.57	3545.59	757.841	1677.16	763.911	2014.31	2041.6	2996.85	4686.72	10071.6	3598.06	3391.2	4382.48	1459.54	2202.59	2681.62	3072.64	3623.71	1476.61	12070811	858.269	3238.46	1358.34	5605.64
P08280	P08280	recA	Protein RecA	P08280	RECA_PSEAE	>sp|P08280|RECA_PSEAE Protein RecA OS=Pseudomonas aeruginosa (strain ATCC 15692 / DSM 22644 / CIP 104116 / JCM 14847 / LMG 12228 / 1C / PRS 101 / PAO1) OX=208964 GN=recA PE=3 SV=1	36879.1	1.02714e+06	1.23206e+06	1.18617e+06	1.24935e+06	1.28491e+06	1.16162e+06	86047.6	715112	867865	800013	609027	897657	702015	890904	1.03543e+06	1.18341e+06	711819	709616	798714	488434	800699	765335	904104	2.59724e+06	976109	1.04025e+06	1087029	828235	903174	928228	1.08489e+06	873831	975870	1.14876e+06	2.10827e+06	1.14407e+06	964370	982649	834363
P08308	P08308	arcB	Ornithine carbamoyltransferase, catabolic	P08308	OTCC_PSEAE	>sp|P08308|OTCC_PSEAE Ornithine carbamoyltransferase, catabolic OS=Pseudomonas aeruginosa (strain ATCC 15692 / DSM 22644 / CIP 104116 / JCM 14847 / LMG 12228 / 1C / PRS 101 / PAO1) OX=208964 GN=arcB PE=1 SV=3	38108.5	1.50335e+06	1853914	1.6761e+06	1.8525e+06	1886968	1.39378e+06	1.88422e+06	2.1692e+06	2891928	5628856	5.32788e+06	1.30643e+06	5.46117e+06	1.28042e+06	1.67752e+06	1.37847e+06	999524	2661680	738326	563393	1.63297e+06	2.46264e+06	1.64237e+06	1.77534e+06	1.19317e+06	2.23678e+06	1.99046e+06	1.07099e+06	2996339	1.85605e+06	1472735	2.58128e+06	1437379	1.75551e+06	163936	392274	2.36934e+06	1.01244e+06	1.72394e+06
P09591	P09591	tufA	Elongation factor Tu	P09591	EFTU_PSEAE	>sp|P09591|EFTU_PSEAE Elongation factor Tu OS=Pseudomonas aeruginosa (strain ATCC 15692 / DSM 22644 / CIP 104116 / JCM 14847 / LMG 12228 / 1C / PRS 101 / PAO1) OX=208964 GN=tufA PE=1 SV=2	43369.6	17573320	22818402	20213122	22253374	22372034	16779806	15148539	17234058	17333698	17243692	10443301	19933260	15096596	17761868	20789066	21874526	17183994	20612242	16110621	8.37187e+06	17780068	16280046	14944500	14960373	16263726	19197822	19732330	18450348	22778908	21467154	20087920	22606410	18459292	17681578	33557220	21170852	20764866	15518469	12686636
P09785	P09785	phnA	Anthranilate synthase component 1, pyocyanine specific	P09785	PHNA_PSEAE	>sp|P09785|PHNA_PSEAE Anthranilate synthase component 1, pyocyanine specific OS=Pseudomonas aeruginosa (strain ATCC 15692 / DSM 22644 / CIP 104116 / JCM 14847 / LMG 12228 / 1C / PRS 101 / PAO1) OX=208964 GN=phnA PE=1 SV=2	58670.4	74531.1	89097.7	84651.9	86961.2	95061.7	63377.6	204220	31723.9	62260.7	18279	219489	8259.52	20657.4	13237.5	56351.2	14084.9	33097	246168	7965.66	42437.5	143687	438807	140576	54512.9	122728	230035	136183	174283	83962.8	144024	167038	47157	139358	25186.5	15710.5	242127	36798.7	90923.8	110081
P09786	P09786	phnB	Anthranilate synthase component 2, pyocyanine specific	P09786	PHNB_PSEAE	>sp|P09786|PHNB_PSEAE Anthranilate synthase component 2, pyocyanine specific OS=Pseudomonas aeruginosa (strain ATCC 15692 / DSM 22644 / CIP 104116 / JCM 14847 / LMG 12228 / 1C / PRS 101 / PAO1) OX=208964 GN=phnB PE=1 SV=3	21845.3	445.773	9483.65	5335.02	3254.75	10334	7175.95	28237.8	4369.61	8659.26	2758.74	1597.95	1842.8	3303.71	266.542	2227.09	634.941	2402.26	3481.26	1164.42	152.564	587.982	5112.5	12257.6	2230.3	6559.44	24026.3	14936.5	1176.63	1061.14	15886.2	12741.7	9358.59	18746.1	2981.14	634.691	22505.8	6554.05	2170.58	4110.92
P0C2B2	P0C2B2	dsbA	Thiol:disulfide interchange protein DsbA	P0C2B2	DSBA_PSEAE	>sp|P0C2B2|DSBA_PSEAE Thiol:disulfide interchange protein DsbA OS=Pseudomonas aeruginosa (strain ATCC 15692 / DSM 22644 / CIP 104116 / JCM 14847 / LMG 12228 / 1C / PRS 101 / PAO1) OX=208964 GN=dsbA PE=1 SV=1	23375.1	209463	229571	230455	193268	211460	162618	338521	836666	583532	713239	466460	453353	797698	556537	204477	612137	445909	1.13943e+06	399121	897379	692293	171673	280803	431885	397770	310248	448719	482581	561463	606367	344753	700489	491142	179915	1.23246e+06	187114	358106	257710	231379
P0DP44	P0DP44	ppk	Polyphosphate kinase	P0DP44	PPK1_PSEAE	>sp|P0DP44|PPK1_PSEAE Polyphosphate kinase OS=Pseudomonas aeruginosa (strain ATCC 15692 / DSM 22644 / CIP 104116 / JCM 14847 / LMG 12228 / 1C / PRS 101 / PAO1) OX=208964 GN=ppk PE=1 SV=1	78292.6	484199	485494	471841	496523	471982	431624	347322	383378	374637	405622	379233	450086	386527	397685	378081	257886	417761	327941	411800	390609	398926	350027	375070	396712	379175	422384	316374	275527	340633	311180	344602	345730	364828	300802	447982	274808	357031	381851	394685
P0DPB9;P0DPC1	P0DPB9;P0DPC1	phzD1;phzD2	Phenazine biosynthesis protein PhzD1;Phenazine biosynthesis protein PhzD2	P0DPB9;P0DPC1	PHZD1_PSEAE;PHZD2_PSEAE	>sp|P0DPB9|PHZD1_PSEAE Phenazine biosynthesis protein PhzD1 OS=Pseudomonas aeruginosa (strain ATCC 15692 / DSM 22644 / CIP 104116 / JCM 14847 / LMG 12228 / 1C / PRS 101 / PAO1) OX=208964 GN=phzD1 PE=1 SV=1;>sp|P0DPC1|PHZD2_PSEAE Phenazine biosynthesis protein PhzD2 OS=Pseudomonas aeruginosa (strain ATCC 15692 / DSM 22644 / CIP 104116 / JCM 14847 / LMG 12228 / 1C / PRS 101 / PAO1) OX=208964 GN=phz…	23195.56;23195.56	111299	184860	190927	187978	198233	535759	831171	221341	168521	143221	5319.65	58477.1	132600	63013.6	6937.67	11739.2	258881	3562.17	15441.5	15055.9	3629.58	25833	978886	1.0911e+06	224444	759402	664595	195048	256919	439949	442261	249187	683138	8546.21	6214.52	281445	130392	195002	216113
P0DTB6	P0DTB6	tsi5	Immune protein Tsi5	P0DTB6	TSI5_PSEAE	>sp|P0DTB6|TSI5_PSEAE Immune protein Tsi5 OS=Pseudomonas aeruginosa (strain ATCC 15692 / DSM 22644 / CIP 104116 / JCM 14847 / LMG 12228 / 1C / PRS 101 / PAO1) OX=208964 GN=tsi5 PE=3 SV=1	8758.51	36840.6	41007.4	26826.2	33444.4	20278.2	56602.4	17125.7	9268.72	25338.8	11186	19490.7	16928.1	4386.66	18738	64185.1	14436.4	NaN	22682.8	14507.6	24738.4	11587.2	39911.1	49449.7	37155.8	9000.39	47081.1	13159.6	25900.9	18160.3	18805.9	21059.5	14144.8	17665.4	24574.2	4784.88	19005.5	20771	19584.2	14098.2
P11221	P11221	oprI	Major outer membrane lipoprotein	P11221	OPRI_PSEAE	>sp|P11221|OPRI_PSEAE Major outer membrane lipoprotein OS=Pseudomonas aeruginosa (strain ATCC 15692 / DSM 22644 / CIP 104116 / JCM 14847 / LMG 12228 / 1C / PRS 101 / PAO1) OX=208964 GN=oprI PE=3 SV=1	8834.87	27276596	25166708	32994526	24890030	24044442	16345888	16811236	13177659	32526228	14986067	32169068	23143848	19157634	26143870	22511686	20872316	50292360	21799906	45746484	53513156	20596850	23741498	17639706	24949732	20418456	21506784	19229364	23489058	16743082	22697022	26300854	16090038	16130825	25854836	30509052	22980220	31219778	23028436	21027268
P11436	P11436	amiE	Aliphatic amidase	P11436	AMIE_PSEAE	>sp|P11436|AMIE_PSEAE Aliphatic amidase OS=Pseudomonas aeruginosa (strain ATCC 15692 / DSM 22644 / CIP 104116 / JCM 14847 / LMG 12228 / 1C / PRS 101 / PAO1) OX=208964 GN=amiE PE=1 SV=2	38494.7	14868.3	14423.6	15544.5	15730.2	18104.4	19668	49816.4	5414.91	5097	18811.6	22112.8	27392.1	22667.1	15319.9	10141.4	5929.09	8753.62	2849.52	14478	8586.53	32154.8	33852.8	11031.7	29008.4	21895.1	5445.36	4460.56	1866.04	2331.08	5137.79	14942.9	2261.33	48486.4	14070.3	26281.9	10953.5	8966.41	9560.12	16524.9
P11720	P11720	trpI	HTH-type transcriptional regulator TrpI	P11720	TRPI_PSEAE	>sp|P11720|TRPI_PSEAE HTH-type transcriptional regulator TrpI OS=Pseudomonas aeruginosa (strain ATCC 15692 / DSM 22644 / CIP 104116 / JCM 14847 / LMG 12228 / 1C / PRS 101 / PAO1) OX=208964 GN=trpI PE=1 SV=2	32253	7003.77	6366.55	7105.98	7245.66	8454.15	6830.45	4434.71	4519.51	4731.76	5482.68	6047.41	5138.5	6063.21	5703.52	9521.13	6331.4	4316.77	3639.29	5102.31	6232.93	5687.65	9151.15	4966.55	7350.15	6311.46	6332.47	5117.62	4714.2	4373.42	4221.53	4786.45	3134.63	7264.44	6901.12	10522.7	9477	4027.5	7068.39	4754.29
P11724	P11724	argF	Ornithine carbamoyltransferase, anabolic	P11724	OTCA_PSEAE	>sp|P11724|OTCA_PSEAE Ornithine carbamoyltransferase, anabolic OS=Pseudomonas aeruginosa (strain ATCC 15692 / DSM 22644 / CIP 104116 / JCM 14847 / LMG 12228 / 1C / PRS 101 / PAO1) OX=208964 GN=argF PE=1 SV=3	33924.7	157055	153309	147165	142425	164262	123387	88530.5	99934.4	115799	123062	159975	93995.7	135779	93342.3	247083	148926	109075	73752.9	181219	98956.2	119236	121957	119037	11736.9	143380	170794	106452	120665	99176.2	138182	194965	127744	91129.5	200715	130363	138158	99430	181267	112678
P11759	P11759	algD	GDP-mannose 6-dehydrogenase	P11759	ALGD_PSEAE	>sp|P11759|ALGD_PSEAE GDP-mannose 6-dehydrogenase OS=Pseudomonas aeruginosa (strain ATCC 15692 / DSM 22644 / CIP 104116 / JCM 14847 / LMG 12228 / 1C / PRS 101 / PAO1) OX=208964 GN=algD PE=1 SV=2	47599.6	29197.1	3847.08	4325.6	4260.07	4054.33	2703.86	12019.7	7534.55	5990.23	13712.5	4628.48	30212.8	8255.43	4425.35	5202.23	44319.2	11535.9	14817.2	5630.22	18069.1	6367.75	5536.96	7057.99	7679.49	63617.2	7101.22	8123.39	9451.09	9812.13	9517.39	5058.6	10537.1	4416.22	6091.64	52262924	4519.78	7064.61	6528.3	23657.9
P13794	P13794	oprF	Outer membrane porin F	P13794	PORF_PSEAE	>sp|P13794|PORF_PSEAE Outer membrane porin F OS=Pseudomonas aeruginosa (strain ATCC 15692 / DSM 22644 / CIP 104116 / JCM 14847 / LMG 12228 / 1C / PRS 101 / PAO1) OX=208964 GN=oprF PE=1 SV=1	37639.6	10582594	11551955	11214176	10102663	9927436	6.8652e+06	14253046	12937564	12601215	12381631	10461686	15677415	10434110	13079261	7580465	8.18978e+06	12546018	12717238	7.71418e+06	12054759	15423082	10524226	9196785	10562698	10225274	8.02174e+06	10166274	9962405	11827583	10089523	6.95307e+06	12919177	13303198	8576848	10673188	11470514	14363593	6951627	13310115
P13981	P13981	arcA	Arginine deiminase	P13981	ARCA_PSEAE	>sp|P13981|ARCA_PSEAE Arginine deiminase OS=Pseudomonas aeruginosa (strain ATCC 15692 / DSM 22644 / CIP 104116 / JCM 14847 / LMG 12228 / 1C / PRS 101 / PAO1) OX=208964 GN=arcA PE=1 SV=2	46436	1.40441e+06	2.09012e+06	1.79144e+06	2070323	2216106	1.28409e+06	1.92292e+06	2200511	3.19593e+06	6.47104e+06	4.88466e+06	1.7309e+06	5110611	1.51124e+06	1555235	1428077	1.13126e+06	1.50675e+06	555669	614862	1.00845e+06	2.33706e+06	1.37128e+06	1.59142e+06	1.36598e+06	2270411	2203594	818438	3.49226e+06	2.03589e+06	1.90887e+06	2352020	1.28869e+06	1.69652e+06	313540	408518	2.65867e+06	1.05878e+06	1.5073e+06
P13982	P13982	arcC	Carbamate kinase	P13982	ARCC_PSEAE	>sp|P13982|ARCC_PSEAE Carbamate kinase OS=Pseudomonas aeruginosa (strain ATCC 15692 / DSM 22644 / CIP 104116 / JCM 14847 / LMG 12228 / 1C / PRS 101 / PAO1) OX=208964 GN=arcC PE=1 SV=1	33080.1	1721737	1.81707e+06	1.56588e+06	1.79484e+06	1.77168e+06	1.09097e+06	945739	1.07893e+06	1.53296e+06	3408168	3.07121e+06	779236	3188214	783397	946295	808359	773959	1.50514e+06	640674	1080589	580059	1.48653e+06	1.02858e+06	1.14124e+06	851920	1.52511e+06	1.29308e+06	721499	2227114	1.32622e+06	893702	2.01317e+06	821575	1.01238e+06	164389	236718	1.7271e+06	734904	890793
P14165	P14165	gltA	Citrate synthase	P14165	CISY_PSEAE	>sp|P14165|CISY_PSEAE Citrate synthase OS=Pseudomonas aeruginosa (strain ATCC 15692 / DSM 22644 / CIP 104116 / JCM 14847 / LMG 12228 / 1C / PRS 101 / PAO1) OX=208964 GN=gltA PE=1 SV=2	47694.8	1258305	1.35542e+06	1.28368e+06	1.33972e+06	1.40447e+06	1.79131e+06	1.6837e+06	1.93035e+06	2119695	1.69977e+06	1296415	2.36017e+06	1592525	2.08099e+06	1594043	1.3243e+06	2757410	1.80053e+06	1.36136e+06	1116575	1.92351e+06	1.44384e+06	1.4908e+06	1.99688e+06	1.73473e+06	1.63199e+06	1.66972e+06	1.22676e+06	2.24929e+06	1.56532e+06	1861328	1424515	1.72943e+06	1.67875e+06	1.84686e+06	1.55205e+06	1.75563e+06	1.41552e+06	1.69596e+06
P14532	P14532	ccpA	Cytochrome c551 peroxidase	P14532	CCPR_PSEAE	>sp|P14532|CCPR_PSEAE Cytochrome c551 peroxidase OS=Pseudomonas aeruginosa (strain ATCC 15692 / DSM 22644 / CIP 104116 / JCM 14847 / LMG 12228 / 1C / PRS 101 / PAO1) OX=208964 GN=ccpA PE=1 SV=2	37403.3	1.71359e+06	1.78467e+06	1.82381e+06	1.85859e+06	1.76097e+06	631763	469355	251609	353798	26935.8	630518	897640	1.00016e+06	819395	203332	767743	298341	260840	750227	333570	918567	931231	950564	634126	857864	1.19778e+06	518247	302491	721030	454553	810854	518164	385140	440785	18225.3	81828.6	255442	1.16799e+06	189820
P14756	P14756	lasB	Elastase	P14756	ELAS_PSEAE	>sp|P14756|ELAS_PSEAE Elastase OS=Pseudomonas aeruginosa (strain ATCC 15692 / DSM 22644 / CIP 104116 / JCM 14847 / LMG 12228 / 1C / PRS 101 / PAO1) OX=208964 GN=lasB PE=1 SV=1	53687.1	101272	107205	104993	113312	132920	110746	580949	1.22716e+06	542429	2.41881e+06	98806	641132	804285	507611	41406.4	44030.3	163739	74459.1	34406	751368	275734	30446.6	264517	160419	38853.6	78039.2	117146	113076	667980	187039	124834	302817	724386	40992.1	38042.3	75253.4	781345	44964.8	330985
P14789	P14789	lasA	Protease LasA	P14789	LASA_PSEAE	>sp|P14789|LASA_PSEAE Protease LasA OS=Pseudomonas aeruginosa (strain ATCC 15692 / DSM 22644 / CIP 104116 / JCM 14847 / LMG 12228 / 1C / PRS 101 / PAO1) OX=208964 GN=lasA PE=1 SV=3	45517.2	50163.8	76496.6	74586.5	78832	75440.6	42939	34808.8	84566	35855.4	92984.7	3090.28	4469.67	20904.3	6968.19	3442.26	7175.39	102134	7570.88	708.123	11980.3	7750.61	3711.72	57403.9	16269.2	5213.99	31693.5	13565.4	9678.62	46106.9	25753.3	29081.5	62659.6	33921.1	2302.09	4553.38	2847.6	42208.3	11304.9	27722.5
P15275	P15275	algQ	Transcriptional regulatory protein AlgQ	P15275	ALGQ_PSEAE	>sp|P15275|ALGQ_PSEAE Transcriptional regulatory protein AlgQ OS=Pseudomonas aeruginosa (strain ATCC 15692 / DSM 22644 / CIP 104116 / JCM 14847 / LMG 12228 / 1C / PRS 101 / PAO1) OX=208964 GN=algQ PE=3 SV=1	18011.2	91566.4	88834.2	83259.2	91611.7	127754	55054.3	81631.7	117371	72399	122250	69301.3	101732	99972.1	106060	82821.7	62287.4	70589.6	32083.8	36428.8	51712.9	31798.4	79305.7	72082.4	100046	47057.7	53452.9	122176	36440.1	115398	111740	113088	72199	59123.3	99088.8	47264.8	95959.9	63288.2	64341	76119
P15276	P15276	algP	Transcriptional regulatory protein AlgP	P15276	ALGP_PSEAE	>sp|P15276|ALGP_PSEAE Transcriptional regulatory protein AlgP OS=Pseudomonas aeruginosa (strain ATCC 15692 / DSM 22644 / CIP 104116 / JCM 14847 / LMG 12228 / 1C / PRS 101 / PAO1) OX=208964 GN=algP PE=4 SV=2	34490.6	767692	792424	766378	691816	566251	814632	638359	707157	706272	896605	908509	1.2361e+06	966108	994295	736812	586202	2.18168e+06	1.10254e+06	1.23179e+06	1.5052e+06	782881	1074604	912095	751043	793583	824778	645715	607635	903287	521968	520648	821890	895422	538247	685850	628169	998171	1.06234e+06	916663
P17323	P17323	lppL	Lipopeptide	P17323	LPPL_PSEAE	>sp|P17323|LPPL_PSEAE Lipopeptide OS=Pseudomonas aeruginosa (strain ATCC 15692 / DSM 22644 / CIP 104116 / JCM 14847 / LMG 12228 / 1C / PRS 101 / PAO1) OX=208964 GN=lppL PE=1 SV=1	5084.97	507175	488418	515598	532489	418973	553734	423848	387965	666507	380668	524690	580772	376548	428738	445935	378026	506062	504810	568882	781856	596342	429381	435251	422644	394186	384343	278487	352854	368829	418685	364672	350698	247286	380538	321895	356310	264457	369494	334404
P18275	P18275	arcD	Arginine/ornithine antiporter	P18275	ARCD_PSEAE	>sp|P18275|ARCD_PSEAE Arginine/ornithine antiporter OS=Pseudomonas aeruginosa (strain ATCC 15692 / DSM 22644 / CIP 104116 / JCM 14847 / LMG 12228 / 1C / PRS 101 / PAO1) OX=208964 GN=arcD PE=1 SV=1	52026.8	182019	171731	175628	183560	195986	90941.8	88562.2	133492	208182	330438	419845	88980.9	321650	96718.4	105901	40649.9	98270.6	60714.4	91154.9	82640.5	63654.5	138164	77845	73848.9	50982.1	74624.2	60138.3	42675.5	117729	87568.7	71298.4	87622.2	53685	94864.6	55284.9	7511.81	103265	55108.8	74488
P18895	P18895	algE	Alginate production protein AlgE	P18895	ALGE_PSEAE	>sp|P18895|ALGE_PSEAE Alginate production protein AlgE OS=Pseudomonas aeruginosa (strain ATCC 15692 / DSM 22644 / CIP 104116 / JCM 14847 / LMG 12228 / 1C / PRS 101 / PAO1) OX=208964 GN=algE PE=1 SV=2	54421.6	2797.44	2876.91	3136.82	2457.14	2714.35	3794.58	4364.88	4258.31	5490.63	6259.67	7525.49	4698.41	6458.1	3993.49	5329.78	1802.67	5718.69	9257.21	7246.15	19134.1	9126.46	6895.55	6221.7	5384.38	4251.56	4205.62	4994.05	5194.14	4960.41	4147.26	4005.51	1696.34	2554.54	3983.13	10601	4660.32	3952.15	5360.46	3718.3
P19572	P19572	lysA	Diaminopimelate decarboxylase	P19572	DCDA_PSEAE	>sp|P19572|DCDA_PSEAE Diaminopimelate decarboxylase OS=Pseudomonas aeruginosa (strain ATCC 15692 / DSM 22644 / CIP 104116 / JCM 14847 / LMG 12228 / 1C / PRS 101 / PAO1) OX=208964 GN=lysA PE=3 SV=2	45490.7	131827	142955	141073	139864	161853	103846	96876.3	112300	107028	116766	92040.8	109302	110023	102821	90337	102385	107376	100683	72220.2	82892.1	106082	107457	101411	105356	103014	106964	99543.2	55529.5	109134	101659	112990	97772.4	89117	101018	86194.1	74935.5	99963.9	93669.4	110838
P20574	P20574	trpD	Anthranilate phosphoribosyltransferase	P20574	TRPD_PSEAE	>sp|P20574|TRPD_PSEAE Anthranilate phosphoribosyltransferase OS=Pseudomonas aeruginosa (strain ATCC 15692 / DSM 22644 / CIP 104116 / JCM 14847 / LMG 12228 / 1C / PRS 101 / PAO1) OX=208964 GN=trpD PE=3 SV=1	37383.9	45917.5	46164.8	44919.4	45651.6	46926.2	35235.5	129725	26196.6	20777.6	39313.9	27376.6	36461	41872	42117.4	43919.6	48213.2	47725.9	11913.9	54141.6	17108.6	15522	39855.2	41018.3	37777.2	33212.2	42378.7	25378.5	25572.3	24381.5	26470.8	53863.3	28227.6	18850.6	38308.6	58563.5	25914.5	29088.8	55836.7	22340.5
P20576	P20576	trpG	Anthranilate synthase component 2	P20576	TRPG_PSEAE	>sp|P20576|TRPG_PSEAE Anthranilate synthase component 2 OS=Pseudomonas aeruginosa (strain ATCC 15692 / DSM 22644 / CIP 104116 / JCM 14847 / LMG 12228 / 1C / PRS 101 / PAO1) OX=208964 GN=trpG PE=1 SV=2	22046.2	22377.9	54292.9	43143.8	49358.4	44267.2	30579.2	59288.5	10474.6	14166.6	13168.2	18065.6	22526.2	17545.3	16089.5	23468.2	15109.6	21568.9	39848	18974.7	34690.6	11725.8	3244.35	21063.6	18200.6	25818.6	27459.1	17210.3	20536.3	23075.3	17010.3	33965.5	27215.1	11541.1	20451.5	27168.9	16147	15798.8	19943.5	9978.11
P20577	P20577	trpC	Indole-3-glycerol phosphate synthase	P20577	TRPC_PSEAE	>sp|P20577|TRPC_PSEAE Indole-3-glycerol phosphate synthase OS=Pseudomonas aeruginosa (strain ATCC 15692 / DSM 22644 / CIP 104116 / JCM 14847 / LMG 12228 / 1C / PRS 101 / PAO1) OX=208964 GN=trpC PE=3 SV=1	30347	110616	94458	92285.5	88243.3	87098.8	77919	268444	93382.2	79682.2	126247	95511.9	97562.9	110148	105036	103876	106904	136088	96246.5	149621	99618.6	75542.4	77410.6	103637	130370	77343	92534.4	77138.7	80915.4	90275.7	66261.7	100796	110676	76978.3	61211.6	83248.2	65907.8	92001.5	106257	60582.3
P20580	P20580	trpE	Anthranilate synthase component 1	P20580	TRPE_PSEAE	>sp|P20580|TRPE_PSEAE Anthranilate synthase component 1 OS=Pseudomonas aeruginosa (strain ATCC 15692 / DSM 22644 / CIP 104116 / JCM 14847 / LMG 12228 / 1C / PRS 101 / PAO1) OX=208964 GN=trpE PE=1 SV=1	54555.3	109280	105892	105704	101392	108246	162663	153901	164012	139382	174102	1.27491e+06	143612	175072	148299	150642	169351	161562	98990	189855	118258	85370.5	151278	140911	297887	133197	152764	177335	151615	141980	167763	165309	166148	134024	173653	164409	124320	136891	137485	135980
P20581	P20581	pqsE	2-aminobenzoylacetyl-CoA thioesterase	P20581	PQSE_PSEAE	>sp|P20581|PQSE_PSEAE 2-aminobenzoylacetyl-CoA thioesterase OS=Pseudomonas aeruginosa (strain ATCC 15692 / DSM 22644 / CIP 104116 / JCM 14847 / LMG 12228 / 1C / PRS 101 / PAO1) OX=208964 GN=pqsE PE=1 SV=1	34306.3	2.1686e+06	2.23898e+06	1974398	1.83507e+06	2.05108e+06	1.70399e+06	3.89938e+06	1344487	1137946	987554	4572090	203131	996349	142149	1.09937e+06	334138	1.73869e+06	16015540	177965	2.06887e+06	6.44733e+06	7509530	2.65065e+06	1683295	2418389	3.6099e+06	2.96513e+06	3.29154e+06	2324377	2.45226e+06	1.96925e+06	2.28445e+06	3.84731e+06	370547	128425	3756318	1.4546e+06	1935409	2.3724e+06
P20582	P20582	pqsD	Anthraniloyl-CoA anthraniloyltransferase	P20582	PQSD_PSEAE	>sp|P20582|PQSD_PSEAE Anthraniloyl-CoA anthraniloyltransferase OS=Pseudomonas aeruginosa (strain ATCC 15692 / DSM 22644 / CIP 104116 / JCM 14847 / LMG 12228 / 1C / PRS 101 / PAO1) OX=208964 GN=pqsD PE=1 SV=2	36378.8	334080	394833	412790	391955	422633	356970	739161	309232	291326	204622	850417	9246.33	198239	3923.78	199361	35024.3	271602	2.44844e+06	20149.9	126370	1.18111e+06	1.88807e+06	520979	398947	480443	820862	814624	593215	557024	802105	535041	512895	707404	67246.2	20983.1	808042	385972	410568	678191
P20586	P20586	pobA	p-hydroxybenzoate hydroxylase	P20586	PHHY_PSEAE	>sp|P20586|PHHY_PSEAE p-hydroxybenzoate hydroxylase OS=Pseudomonas aeruginosa (strain ATCC 15692 / DSM 22644 / CIP 104116 / JCM 14847 / LMG 12228 / 1C / PRS 101 / PAO1) OX=208964 GN=pobA PE=1 SV=1	44323.6	16150.9	16479.1	14519.5	16971.3	17228.2	25366.6	26038	12480.2	25817.3	26397.9	6686.75	39649.9	27106.7	40392.8	16752	11792.9	14812.5	6277.33	29393.3	14236.9	7417.16	9975.55	30545.8	36257	6597.81	30663.1	14654.9	5688.43	16250.9	13143.5	20249.1	13304	17399.7	9419.96	10322.4	17404.5	24970.4	11291.3	25699.3
P21175	P21175	braC	Leucine-, isoleucine-, valine-, threonine-, and alanine-binding protein	P21175	BRAC_PSEAE	>sp|P21175|BRAC_PSEAE Leucine-, isoleucine-, valine-, threonine-, and alanine-binding protein OS=Pseudomonas aeruginosa (strain ATCC 15692 / DSM 22644 / CIP 104116 / JCM 14847 / LMG 12228 / 1C / PRS 101 / PAO1) OX=208964 GN=braC PE=1 SV=2	39769.3	665194	713673	682336	692525	640198	1.18347e+06	1.08239e+06	1.08252e+06	794664	841646	778696	1.45561e+06	1.01284e+06	1.22093e+06	1.37927e+06	891620	424774	1.13994e+06	1.18848e+06	875194	846091	1.04554e+06	890292	1.10095e+06	526081	1.07322e+06	665260	716392	1.17113e+06	663502	1.67502e+06	806984	946384	627339	128306	378208	618188	926555	397162
P21628	P21628	braE	High-affinity branched-chain amino acid transport system permease protein BraE	P21628	BRAE_PSEAE	>sp|P21628|BRAE_PSEAE High-affinity branched-chain amino acid transport system permease protein BraE OS=Pseudomonas aeruginosa (strain ATCC 15692 / DSM 22644 / CIP 104116 / JCM 14847 / LMG 12228 / 1C / PRS 101 / PAO1) OX=208964 GN=braE PE=3 SV=1	45561.8	257630	214856	210295	192901	194034	149738	62227.7	39445	53197.1	36915.3	102022	118673	63196.5	95661.7	170348	55192.9	18460.5	36319.8	127201	41163.9	102477	99212.3	97217.5	41524	51278.6	97597.4	51079.6	35151.4	44047.7	35934.4	122975	38965.4	43199.6	90234.5	60518.1	13547.8	42055.1	78692.3	38203.3
P21629	P21629	braF	High-affinity branched-chain amino acid transport ATP-binding protein BraF	P21629	BRAF_PSEAE	>sp|P21629|BRAF_PSEAE High-affinity branched-chain amino acid transport ATP-binding protein BraF OS=Pseudomonas aeruginosa (strain ATCC 15692 / DSM 22644 / CIP 104116 / JCM 14847 / LMG 12228 / 1C / PRS 101 / PAO1) OX=208964 GN=braF PE=3 SV=1	28283.8	280675	273076	303627	295257	300096	225849	129814	61180.3	75401.5	73650.8	142724	164736	96111	149586	257649	103743	37025.6	83250.4	162807	49175.4	192210	219102	167664	125245	120133	168466	75810.7	63815.8	63351.3	53341.5	227545	52601	95925.3	167666	67490	60518.2	62355	149261	83250.2
P21630	P21630	braG	High-affinity branched-chain amino acid transport ATP-binding protein BraG	P21630	BRAG_PSEAE	>sp|P21630|BRAG_PSEAE High-affinity branched-chain amino acid transport ATP-binding protein BraG OS=Pseudomonas aeruginosa (strain ATCC 15692 / DSM 22644 / CIP 104116 / JCM 14847 / LMG 12228 / 1C / PRS 101 / PAO1) OX=208964 GN=braG PE=3 SV=1	25591.7	240503	236781	232147	231862	239617	192730	104129	60380.4	53982.6	55038.2	95509.8	100504	72204.4	88947.4	186590	73464	28194.4	79352.2	95489.9	48802.5	112745	141507	111392	87426.4	89480.2	122259	59978.4	52312.3	62456.8	50433	165489	43567.6	80723.6	122846	44518.4	55915.1	55692.1	97954.4	72345.1
P22008	P22008	proC	Pyrroline-5-carboxylate reductase	P22008	P5CR_PSEAE	>sp|P22008|P5CR_PSEAE Pyrroline-5-carboxylate reductase OS=Pseudomonas aeruginosa (strain ATCC 15692 / DSM 22644 / CIP 104116 / JCM 14847 / LMG 12228 / 1C / PRS 101 / PAO1) OX=208964 GN=proC PE=1 SV=2	28094.1	173172	139803	110633	152055	189719	185412	126734	236396	185788	200990	99587.6	266026	214715	221976	181110	265668	172934	159415	163090	42035	161141	123867	145559	235381	182653	170083	252789	148048	338831	207643	207864	215097	148265	123028	422060	188140	244956	171179	176694
P22567	P22567	argA	Amino-acid acetyltransferase	P22567	ARGA_PSEAE	>sp|P22567|ARGA_PSEAE Amino-acid acetyltransferase OS=Pseudomonas aeruginosa (strain ATCC 15692 / DSM 22644 / CIP 104116 / JCM 14847 / LMG 12228 / 1C / PRS 101 / PAO1) OX=208964 GN=argA PE=1 SV=2	47858.7	108611	111309	95697.1	99873.1	115836	173622	79452.2	67810.1	90931.2	86553.4	92830.2	85321.2	91250.8	90611.9	107305	80262.9	255472	66494.6	131701	48333.5	48459.9	79129.2	89411.6	74500.1	106036	85687.7	127198	78062.7	88735.1	113365	118583	93571.8	67227.2	135759	147406	111296	78474	95416.3	52346.7
P22608	P22608	pilB	Type IV pilus assembly ATPase PilB	P22608	PILB_PSEAE	>sp|P22608|PILB_PSEAE Type IV pilus assembly ATPase PilB OS=Pseudomonas aeruginosa (strain ATCC 15692 / DSM 22644 / CIP 104116 / JCM 14847 / LMG 12228 / 1C / PRS 101 / PAO1) OX=208964 GN=pilB PE=1 SV=2	62328.2	363980	347513	341068	343404	361129	236265	101385	149884	75995.7	94047.3	19142.1	97329.7	17406.1	92315.8	322439	103479	112833	113158	96291	71478.5	141258	207908	166495	149003	106957	182098	141196	155764	114759	139905	244525	105411	97921.5	249772	126657	115446	122487	228424	80970.6
P22609	P22609	pilC	Type IV pilus assembly protein PilC	P22609	PILC_PSEAE	>sp|P22609|PILC_PSEAE Type IV pilus assembly protein PilC OS=Pseudomonas aeruginosa (strain ATCC 15692 / DSM 22644 / CIP 104116 / JCM 14847 / LMG 12228 / 1C / PRS 101 / PAO1) OX=208964 GN=pilC PE=1 SV=2	40887.1	14321.7	36767.2	28690.6	33549.3	32761	45850.5	52461	45310.1	12627.8	12271.3	10230.6	14988.6	16229.3	16111.9	30924.3	22167.7	8560.27	47986.8	17177.8	8088.05	85501.6	36076.2	30647.5	33515	17657	80013.2	49895.6	16905.8	30988.3	57561.7	60719	50340.4	28944.3	49559.9	14737.6	17496.6	28655.3	27897.6	12262.9
P22610	P22610	pilD	Prepilin leader peptidase/N-methyltransferase	P22610	LEP4_PSEAE	>sp|P22610|LEP4_PSEAE Prepilin leader peptidase/N-methyltransferase OS=Pseudomonas aeruginosa (strain ATCC 15692 / DSM 22644 / CIP 104116 / JCM 14847 / LMG 12228 / 1C / PRS 101 / PAO1) OX=208964 GN=pilD PE=1 SV=3	31869.9	88638.3	92774.6	88850.6	80741.1	89994	49357.5	30163.8	21558.8	19347	14231.4	7912.33	17537.1	8328.58	16535.8	79082.8	20297.5	26985.4	25691.1	42407.1	4981.94	48608.6	73066.3	46589.4	33310.5	30235.5	52310.1	40743.1	49578.7	39624.6	50175	62548.7	32411.1	40384.7	51207.3	33477.6	24297.5	33947.6	76911.6	12762.4
P23189	P23189	gor	Glutathione reductase	P23189	GSHR_PSEAE	>sp|P23189|GSHR_PSEAE Glutathione reductase OS=Pseudomonas aeruginosa (strain ATCC 15692 / DSM 22644 / CIP 104116 / JCM 14847 / LMG 12228 / 1C / PRS 101 / PAO1) OX=208964 GN=gor PE=3 SV=1	49237.2	81728.8	80488.6	78924.6	94008.5	85355.7	83329.8	125013	144923	141215	121811	110884	137173	124749	128414	67299.7	86441.3	175758	178888	98875.6	103095	127491	146361	123504	138090	80560.2	129425	124198	93461.3	139012	123601	103234	157922	127855	72122	104083	102462	150753	94173.9	130302
P23205	P23205	PA2024	Uncharacterized protein PA2024	P23205	Y2024_PSEAE	>sp|P23205|Y2024_PSEAE Uncharacterized protein PA2024 OS=Pseudomonas aeruginosa (strain ATCC 15692 / DSM 22644 / CIP 104116 / JCM 14847 / LMG 12228 / 1C / PRS 101 / PAO1) OX=208964 GN=PA2024 PE=4 SV=2	15373.5	13934	11666.5	10113.3	13895.6	11625.3	12497.7	33880.2	49166.6	38141.5	39996.7	25019.1	36523.9	33802.4	21694.7	2162.33	5562.73	38193.4	47548	3738.48	60428.9	26109.3	17643.7	24962.8	19188.2	12090.6	16846.9	22912.5	15176.7	40426.9	28502.5	9986.35	46295.6	17162	4693.78	7159.32	5850.24	45626.1	3750.77	1752.04
P23620	P23620	phoB	Phosphate regulon transcriptional regulatory protein PhoB	P23620	PHOB_PSEAE	>sp|P23620|PHOB_PSEAE Phosphate regulon transcriptional regulatory protein PhoB OS=Pseudomonas aeruginosa (strain ATCC 15692 / DSM 22644 / CIP 104116 / JCM 14847 / LMG 12228 / 1C / PRS 101 / PAO1) OX=208964 GN=phoB PE=3 SV=2	25711.6	73461.2	89911	76596.1	87694.3	99861.2	101649	57226.4	31852.7	45698.4	65907.6	73749.9	86753.3	89950.5	116256	173297	23231.5	26310.2	46307.8	97948.3	67309.9	52125.8	80886.3	18654.8	29901.5	16169	21583.1	19712.2	21331.4	49206.7	35472.5	28207.8	16469.9	48991.5	24962.4	41506.3	25927	51469.3	24388.9	19328.4
P23621	P23621	phoR	Phosphate regulon sensor protein PhoR	P23621	PHOR_PSEAE	>sp|P23621|PHOR_PSEAE Phosphate regulon sensor protein PhoR OS=Pseudomonas aeruginosa (strain ATCC 15692 / DSM 22644 / CIP 104116 / JCM 14847 / LMG 12228 / 1C / PRS 101 / PAO1) OX=208964 GN=phoR PE=3 SV=2	50120.1	34170.9	32310.5	32875.7	34992.1	36635.5	49640.7	24287	19424.8	30966.2	36030.9	53624.7	57659.6	63397.7	60797.7	69856.9	11377.8	38626.7	19765.5	57880.5	34529.1	32568.3	35436.9	16100.6	20995.8	17584.7	17889.2	21413.1	14843.5	22586.4	20747.7	14592	16568.2	27405.9	14732.2	26175.1	15389.4	21952	15118.2	19224.8
P23747	P23747	algB	Alginate biosynthesis transcriptional regulatory protein AlgB	P23747	ALGB_PSEAE	>sp|P23747|ALGB_PSEAE Alginate biosynthesis transcriptional regulatory protein AlgB OS=Pseudomonas aeruginosa (strain ATCC 15692 / DSM 22644 / CIP 104116 / JCM 14847 / LMG 12228 / 1C / PRS 101 / PAO1) OX=208964 GN=algB PE=1 SV=1	49323.1	257354	256100	240119	269024	252528	229880	316119	303385	293794	342903	261559	317014	281093	294490	187315	227914	247163	269999	215430	301279	257524	230136	233849	244287	401660	185460	333281	247361	383937	304397	186498	270635	338332	151304	938446	194423	352801	251158	340590
P23926	P23926	anr	Transcriptional activator protein anr	P23926	ANR_PSEAE	>sp|P23926|ANR_PSEAE Transcriptional activator protein anr OS=Pseudomonas aeruginosa (strain ATCC 15692 / DSM 22644 / CIP 104116 / JCM 14847 / LMG 12228 / 1C / PRS 101 / PAO1) OX=208964 GN=anr PE=4 SV=1	27129.2	106044	104787	101416	109913	114622	131903	109899	134324	108487	117785	105446	111955	129987	127947	125092	87063.4	184962	121984	103339	76376.6	74171.1	168093	145873	198345	103082	79998.1	140190	106817	137003	154969	144487	120818	117052	89597.1	87603.7	153998	154352	72856.9	155921
P24474	P24474	nirS	Nitrite reductase	P24474	NIRS_PSEAE	>sp|P24474|NIRS_PSEAE Nitrite reductase OS=Pseudomonas aeruginosa (strain ATCC 15692 / DSM 22644 / CIP 104116 / JCM 14847 / LMG 12228 / 1C / PRS 101 / PAO1) OX=208964 GN=nirS PE=1 SV=1	62653.3	91417	108123	102300	108494	102887	144392	97283.8	52528	71792.7	92389.2	101951	129931	77768.5	165555	180491	323510	7441.19	102561	189595	41795.7	37573.5	139791	131510	11005.2	175945	193103	146767	250773	85017.6	127420	196942	186200	49882.4	320233	10602	45660.2	83084.6	256360	84425.9
P24559	P24559	pilT	Type IV pilus retractation ATPase PilT	P24559	PILT_PSEAE	>sp|P24559|PILT_PSEAE Type IV pilus retractation ATPase PilT OS=Pseudomonas aeruginosa (strain ATCC 15692 / DSM 22644 / CIP 104116 / JCM 14847 / LMG 12228 / 1C / PRS 101 / PAO1) OX=208964 GN=pilT PE=1 SV=1	38020.9	151165	197876	191033	196747	212933	335696	280613	292833	205051	211752	139796	211512	164415	185050	339028	160341	155569	268130	130326	59184.2	288870	317216	271420	224473	180501	274528	290892	226326	262759	257623	353552	301969	266430	273744	108341	155591	292333	256023	191845
P24562	P24562	PA0394	Pyridoxal phosphate homeostasis protein	P24562	PLPHP_PSEAE	>sp|P24562|PLPHP_PSEAE Pyridoxal phosphate homeostasis protein OS=Pseudomonas aeruginosa (strain ATCC 15692 / DSM 22644 / CIP 104116 / JCM 14847 / LMG 12228 / 1C / PRS 101 / PAO1) OX=208964 GN=PA0394 PE=3 SV=1	24505	44835.3	46888.3	44239.7	42683.3	40427.4	36327.6	53224.4	64625.6	55233.4	70755.8	63783.9	52732.3	75111.2	50443.8	34135	45719.9	68023.1	59169.9	55800.1	90384.8	54152.7	36590.7	41592.3	59460.3	41597.4	53238.1	38547.7	45203.4	43311.1	48077.7	46841.1	54302.9	52454.9	35600.8	36750.6	34007.2	60980.1	41095.1	58899.3
P24735	P24735	ampC	Beta-lactamase	P24735	AMPC_PSEAE	>sp|P24735|AMPC_PSEAE Beta-lactamase OS=Pseudomonas aeruginosa (strain ATCC 15692 / DSM 22644 / CIP 104116 / JCM 14847 / LMG 12228 / 1C / PRS 101 / PAO1) OX=208964 GN=ampC PE=1 SV=2	43401.4	7037.81	3887.45	6287.83	4420.11	4631.83	43003.5	15764.7	17523	13418.7	12587.4	12932.1	12775.6	19549.7	13617.8	7070.98	14626.3	18088.8	21722.1	6286.06	769384	244016	6713.12	14168.9	15622.8	4242.37	11212.5	12412.9	15212.1	13167.1	10499.7	6222.73	15753.4	18008.3	4691.13	2243149	11348.2	7557.66	6807.75	4933.32
P24908	P24908	PA0034	Putative transcriptional regulator	P24908	TRPO_PSEAE	>sp|P24908|TRPO_PSEAE Putative transcriptional regulator OS=Pseudomonas aeruginosa (strain ATCC 15692 / DSM 22644 / CIP 104116 / JCM 14847 / LMG 12228 / 1C / PRS 101 / PAO1) OX=208964 GN=PA0034 PE=1 SV=2	22859.7	5863.1	4084.42	6326.23	7012.17	7242.43	4115.29	2475.2	7314.02	4228.61	1754.34	2303.13	3240.96	3366.94	294.142	3083.22	4102.01	2241.82	6029.13	4758.06	801.033	1650.1	4713.19	3127.56	2753.89	514.568	5223.08	3089.2	1836.28	4105.66	3560.28	4122.92	2110.61	4572.3	10663.7	2277.69	1393.29	1327.47	4159.83	2572.31
P25060	P25060	xcpY	Type II secretion system protein L	P25060	GSPL_PSEAE	>sp|P25060|GSPL_PSEAE Type II secretion system protein L OS=Pseudomonas aeruginosa (strain ATCC 15692 / DSM 22644 / CIP 104116 / JCM 14847 / LMG 12228 / 1C / PRS 101 / PAO1) OX=208964 GN=xcpY PE=1 SV=2	41318.9	21897.2	18486	23982.9	22781.2	18274.6	35144.6	88075.9	82443.1	64927.2	66409.2	58321.2	67308.4	68387.9	75474.9	40877.2	35743.9	19617.5	48977.5	28024.9	63782	79718.8	59747.2	36591.3	56835.5	32519.5	28585.9	95494	81566.5	93313.6	94210.8	28738.4	82113.4	95186.5	25095.1	34084.3	57788	78650.1	29496	75153.7
P25061	P25061	xcpZ	Type II secretion system protein M	P25061	GSPM_PSEAE	>sp|P25061|GSPM_PSEAE Type II secretion system protein M OS=Pseudomonas aeruginosa (strain ATCC 15692 / DSM 22644 / CIP 104116 / JCM 14847 / LMG 12228 / 1C / PRS 101 / PAO1) OX=208964 GN=xcpZ PE=1 SV=1	19265.1	6699.67	8116.78	13449.5	6175.75	8184.06	24466.7	49359.2	30632.4	40115.2	29883.5	15305.1	27307	25810.1	34366.7	15499.8	12547.2	9490.03	11014.3	10586.9	24524.4	22387	22880.7	11972.7	17021.3	8800.79	18765.5	47392.9	17698.9	65876.2	29080.4	10886.7	57461.2	48010.2	2719.3	20322.7	34593.7	49859.4	17021.6	16721.2
P25084	P25084	lasR	Transcriptional activator protein LasR	P25084	LASR_PSEAE	>sp|P25084|LASR_PSEAE Transcriptional activator protein LasR OS=Pseudomonas aeruginosa (strain ATCC 15692 / DSM 22644 / CIP 104116 / JCM 14847 / LMG 12228 / 1C / PRS 101 / PAO1) OX=208964 GN=lasR PE=1 SV=1	26618.5	53197.2	49566.5	43497.5	50481.4	50220.7	8496.73	117731	111741	90239.5	88726	47783.4	65927.6	82898	75703.5	30110.1	40713	17921.1	98436.3	1898.16	75378.5	97809.9	133349	120216	23572.9	105500	31642.5	101409	91210.4	109456	116173	43279	123640	122192	3141.13	7348.99	89657.7	115264	1844.05	85755.6
P25254	P25254	PA0392	Uncharacterized protein PA0392	P25254	Y392_PSEAE	>sp|P25254|Y392_PSEAE Uncharacterized protein PA0392 OS=Pseudomonas aeruginosa (strain ATCC 15692 / DSM 22644 / CIP 104116 / JCM 14847 / LMG 12228 / 1C / PRS 101 / PAO1) OX=208964 GN=PA0392 PE=3 SV=2	21744.8	3304.03	19184.4	16380.9	21446.9	18828.8	21387.2	12606.2	20987	37310.1	7926.78	165.454	25451.5	3860.44	6602.53	1446.06	3171.48	427.067	2752.51	1743.78	110.214	9249.55	1427.85	12046.7	22629.8	10250.3	11332	5969.7	65.4739	25487	22955.7	14713.5	9257.08	11851.7	14818	29429.5	12600.4	13866.2	993.917	5420.37
P26275	P26275	algR	Positive alginate biosynthesis regulatory protein	P26275	ALGR_PSEAE	>sp|P26275|ALGR_PSEAE Positive alginate biosynthesis regulatory protein OS=Pseudomonas aeruginosa (strain ATCC 15692 / DSM 22644 / CIP 104116 / JCM 14847 / LMG 12228 / 1C / PRS 101 / PAO1) OX=208964 GN=algR PE=3 SV=1	27607.9	356854	340538	331784	371071	357903	428348	696930	769942	681212	776931	543151	639995	625461	572823	251056	330148	784852	879367	514624	1.00123e+06	608266	546312	511798	504324	474584	344872	619099	519598	765996	563253	327812	693111	758199	235865	1.31146e+06	448767	771704	368172	705607
P26276	P26276	algC	Phosphomannomutase/phosphoglucomutase	P26276	ALGC_PSEAE	>sp|P26276|ALGC_PSEAE Phosphomannomutase/phosphoglucomutase OS=Pseudomonas aeruginosa (strain ATCC 15692 / DSM 22644 / CIP 104116 / JCM 14847 / LMG 12228 / 1C / PRS 101 / PAO1) OX=208964 GN=algC PE=1 SV=4	50295.5	564814	539424	531721	524449	537060	608224	911095	1.25394e+06	936436	1.15674e+06	733843	936545	888664	1.15597e+06	829138	973295	939095	842543	951723	712681	676434	772170	754642	805736	1.08728e+06	646814	1.26113e+06	967435	1.56406e+06	1.38547e+06	850868	1.19398e+06	1.04952e+06	621666	4.95773e+06	911471	1.04143e+06	795855	914722
P26480	P26480	rpoD	RNA polymerase sigma factor RpoD	P26480	RPOD_PSEAE	>sp|P26480|RPOD_PSEAE RNA polymerase sigma factor RpoD OS=Pseudomonas aeruginosa (strain ATCC 15692 / DSM 22644 / CIP 104116 / JCM 14847 / LMG 12228 / 1C / PRS 101 / PAO1) OX=208964 GN=rpoD PE=1 SV=1	69643.7	1.00499e+06	953539	943784	951980	1.0341e+06	1.03634e+06	797057	775777	952483	842839	852605	1.04705e+06	837554	1.08821e+06	1.1878e+06	1.08418e+06	1.15593e+06	495280	974679	581773	576243	785467	807603	937917	966055	918333	1.00048e+06	870605	901289	1.02995e+06	946162	879789	777966	1.00557e+06	1.03187e+06	1.14751e+06	808469	959218	904402
P26841	P26841	cat	Chloramphenicol acetyltransferase	P26841	CAT4_PSEAE	>sp|P26841|CAT4_PSEAE Chloramphenicol acetyltransferase OS=Pseudomonas aeruginosa (strain ATCC 15692 / DSM 22644 / CIP 104116 / JCM 14847 / LMG 12228 / 1C / PRS 101 / PAO1) OX=208964 GN=cat PE=1 SV=3	23524.5	5805.29	6228.93	4839.84	2291.01	4221.87	17366.1	3975.31	4512.14	9602.34	20069.3	25585.8	12019.3	17487.1	28600	24849.1	17295.8	23152.1	7381.31	5362.04	23675.3	21964.7	48505.9	19787.2	19847.3	2593.55	15548	11069.9	11752.7	26305.4	7692.23	12502.3	10819.5	3046.62	12058.7	4422.97	18369.7	43352.3	5606.4	8786.43
P26876	P26876	lip	Triacylglycerol lipase	P26876	LIP_PSEAE	>sp|P26876|LIP_PSEAE Triacylglycerol lipase OS=Pseudomonas aeruginosa (strain ATCC 15692 / DSM 22644 / CIP 104116 / JCM 14847 / LMG 12228 / 1C / PRS 101 / PAO1) OX=208964 GN=lip PE=1 SV=2	32722.9	6272.49	15872.6	10555.1	8399.52	12650.9	14439	6847.15	13902.4	5274.44	17112.9	17011.3	6381.9	13504.2	19451	17052.8	22543.8	9572.05	12655.4	16859.5	17920	26484	15874.1	8350.64	15245.5	15044.9	13029.7	12148.6	9569.36	6302.67	5837.78	14984.1	9805.72	15602.9	15932.1	6948.6	6722.22	13349.9	1132.18	15331.8
P26993	P26993	exsA	HTH-type transcriptional regulator ExsA	P26993	EXSA_PSEAE	>sp|P26993|EXSA_PSEAE HTH-type transcriptional regulator ExsA OS=Pseudomonas aeruginosa (strain ATCC 15692 / DSM 22644 / CIP 104116 / JCM 14847 / LMG 12228 / 1C / PRS 101 / PAO1) OX=208964 GN=exsA PE=1 SV=2	31641.7	10469.4	13697.7	14691.1	15224.9	17341.9	35047.3	78652.4	23449.7	11272.9	14915	12671.4	94913.8	15912.4	36970.9	40490.7	236909	7214.03	24460.9	10963.6	4234.34	28130.7	29481.7	14866.7	79247.4	9449.28	56265.7	36179.1	54318	29133.6	25584.4	15451	9511.32	30469.3	32230.9	2809.82	6940.95	22536.2	68606.4	31902.7
P26994	P26994	exsB	Type 3 secretion system pilotin	P26994	EXSB_PSEAE	>sp|P26994|EXSB_PSEAE Type 3 secretion system pilotin OS=Pseudomonas aeruginosa (strain ATCC 15692 / DSM 22644 / CIP 104116 / JCM 14847 / LMG 12228 / 1C / PRS 101 / PAO1) OX=208964 GN=exsB PE=1 SV=2	14996.3	3212.58	1746.71	2155.85	2390.19	3905.94	11989.7	39995.1	10693.1	378.557	14684.1	4555	63275	5679.81	21176.5	16197.7	51687.4	6363.29	4576.23	313.486	9171.79	7004.12	11440.7	2816.43	31370	1714.5	900.4	8797.59	13620.8	24650.2	5626.85	3561.85	1956.15	12465.3	5832.96	NaN	5874.37	11088.9	25210.9	9310.85
P26995	P26995	exsC	Transcriptional anti-antiactivator ExsC	P26995	EXSC_PSEAE	>sp|P26995|EXSC_PSEAE Transcriptional anti-antiactivator ExsC OS=Pseudomonas aeruginosa (strain ATCC 15692 / DSM 22644 / CIP 104116 / JCM 14847 / LMG 12228 / 1C / PRS 101 / PAO1) OX=208964 GN=exsC PE=1 SV=1	16228.6	4472.3	8088.96	2472.04	4568.15	8100	35059.9	125041	28797	6636.59	32922	12464.9	161610	62357.5	84502.2	17278.6	216929	5316.68	27658.1	1860.09	2528.94	21245.3	39725.2	3607.95	96054.6	4575.91	14341.6	25551.2	16086.8	13552.3	18436.3	16449.4	12091.6	47050.9	18371.3	1759.03	2169.69	29123	87482.9	37841.8
P27017	P27017	amiC	Aliphatic amidase expression-regulating protein	P27017	AMIC_PSEAE	>sp|P27017|AMIC_PSEAE Aliphatic amidase expression-regulating protein OS=Pseudomonas aeruginosa (strain ATCC 15692 / DSM 22644 / CIP 104116 / JCM 14847 / LMG 12228 / 1C / PRS 101 / PAO1) OX=208964 GN=amiC PE=1 SV=5	42807.1	14805	15360.1	16443.8	14540.5	17448.4	14126.4	7077.05	15915.1	20554.6	11039.4	7856.11	13677.1	14250.9	11991	11242.1	9637.33	8442.86	22955.9	8702.46	5663.97	11979.8	12495.2	13432.7	13466.8	11207.6	11606.7	14380.2	10493.3	26874.1	14223.5	14678.9	16393.5	13400.3	13061.8	20739.5	6237.34	13601.7	6719.43	10621
P27726	P27726	gap	Glyceraldehyde-3-phosphate dehydrogenase	P27726	G3P_PSEAE	>sp|P27726|G3P_PSEAE Glyceraldehyde-3-phosphate dehydrogenase OS=Pseudomonas aeruginosa (strain ATCC 15692 / DSM 22644 / CIP 104116 / JCM 14847 / LMG 12228 / 1C / PRS 101 / PAO1) OX=208964 GN=gap PE=3 SV=3	36170	159766	159591	161184	166543	160023	267337	484239	459523	368255	391880	326309	393312	367173	433404	810779	113044	263268	162170	355581	242020	275115	356312	247242	139621	53388.7	291267	369612	105780	323621	403657	329794	440645	426590	85481.7	43338.3	400980	328972	101854	355034
P28810	P28810	mmsA	Methylmalonate-semialdehyde dehydrogenase [acylating]	P28810	MMSA_PSEAE	>sp|P28810|MMSA_PSEAE Methylmalonate-semialdehyde dehydrogenase [acylating] OS=Pseudomonas aeruginosa (strain ATCC 15692 / DSM 22644 / CIP 104116 / JCM 14847 / LMG 12228 / 1C / PRS 101 / PAO1) OX=208964 GN=mmsA PE=1 SV=2	53663.4	170384	159741	163549	174899	160241	404294	285214	181893	455881	213921	283270	335869	321394	278009	240743	43387.1	133846	157818	225787	210536	286983	406461	190267	7144.88	64194.2	172677	95558.1	41573.1	148677	164833	243363	124154	224967	81787.4	10093.3	30469.5	142420	100391	101757
P28811	P28811	mmsB	3-hydroxyisobutyrate dehydrogenase	P28811	MMSB_PSEAE	>sp|P28811|MMSB_PSEAE 3-hydroxyisobutyrate dehydrogenase OS=Pseudomonas aeruginosa (strain ATCC 15692 / DSM 22644 / CIP 104116 / JCM 14847 / LMG 12228 / 1C / PRS 101 / PAO1) OX=208964 GN=mmsB PE=1 SV=1	30486	190647	255252	228478	266468	232398	442305	358778	242180	586428	193275	168963	331332	294352	303731	259036	53678.8	146301	316894	178244	174607	330443	355276	226318	81769.6	87965.9	243029	115836	61685.6	248478	211845	249687	245519	235949	92274.5	74576.6	51313.1	205485	98006.5	123765
P28812	P28812	PA3568	Uncharacterized protein PA3568	P28812	Y3568_PSEAE	>sp|P28812|Y3568_PSEAE Uncharacterized protein PA3568 OS=Pseudomonas aeruginosa (strain ATCC 15692 / DSM 22644 / CIP 104116 / JCM 14847 / LMG 12228 / 1C / PRS 101 / PAO1) OX=208964 GN=PA3568 PE=3 SV=2	68990.7	108142	110827	108523	115921	114884	260304	140592	37794.5	52413.8	48914.3	149419	149518	129738	75088.4	93130.9	9461.31	43224.4	17509.3	88498.6	48051	129555	276691	70781.7	13977.4	24968.4	66194.3	23630.2	4528.43	37763.9	23636.8	77420.2	14429.2	106713	15784.2	22409.9	8481.05	25974	20934	15566.6
P29248	P29248	fliA	RNA polymerase sigma factor FliA	P29248	FLIA_PSEAE	>sp|P29248|FLIA_PSEAE RNA polymerase sigma factor FliA OS=Pseudomonas aeruginosa (strain ATCC 15692 / DSM 22644 / CIP 104116 / JCM 14847 / LMG 12228 / 1C / PRS 101 / PAO1) OX=208964 GN=fliA PE=3 SV=1	27522.1	106097	100807	96548.1	95569.3	102086	112972	170744	183237	165404	206204	131721	162801	185404	149718	95696.5	111933	191862	183123	131889	190476	149533	161031	154572	135454	111391	126681	156760	130960	200665	155050	121867	192741	177153	82600.1	36812.5	109454	186403	140568	175535
P29363	P29363	thrC	Threonine synthase	P29363	THRC_PSEAE	>sp|P29363|THRC_PSEAE Threonine synthase OS=Pseudomonas aeruginosa (strain ATCC 15692 / DSM 22644 / CIP 104116 / JCM 14847 / LMG 12228 / 1C / PRS 101 / PAO1) OX=208964 GN=thrC PE=3 SV=3	51795.2	164732	311008	248008	328415	360803	247425	306436	238843	300400	231978	88079.7	261258	149686	184380	207499	215671	209538	250028	133706	48149	210880	202797	232812	268931	283326	270537	307296	132781	348775	301148	340461	289506	302041	345628	563038	354728	254720	202961	200992
P29364	P29364	thrB	Homoserine kinase	P29364	KHSE_PSEAE	>sp|P29364|KHSE_PSEAE Homoserine kinase OS=Pseudomonas aeruginosa (strain ATCC 15692 / DSM 22644 / CIP 104116 / JCM 14847 / LMG 12228 / 1C / PRS 101 / PAO1) OX=208964 GN=thrB PE=3 SV=2	35374.4	32385.7	63439.7	54807.8	48704	63025.8	80826.5	38782.2	34016.8	48123.5	31250.6	11083.1	33059.9	13947.8	18167.1	32191.9	43307.4	13664.1	27780	15411.7	970.275	14762.8	18278.8	33763.6	40125.2	30983.5	40350.3	45430.3	17764.8	42927.4	47261.3	49516.5	58723.8	38443.1	35045.1	57788.2	35343	31829.7	11651.5	31505
P29365	P29365	hom	Homoserine dehydrogenase	P29365	DHOM_PSEAE	>sp|P29365|DHOM_PSEAE Homoserine dehydrogenase OS=Pseudomonas aeruginosa (strain ATCC 15692 / DSM 22644 / CIP 104116 / JCM 14847 / LMG 12228 / 1C / PRS 101 / PAO1) OX=208964 GN=hom PE=3 SV=2	46224	253736	261371	258022	261050	241729	288225	279756	213663	260343	259773	279203	232362	269250	249900	282438	268278	283139	218623	270563	209987	238231	289696	275073	309370	334954	313873	257347	261048	265202	228874	337947	287927	285553	353270	357921	376454	245255	313438	231938
P29369	P29369	agmR	Glycerol metabolism activator	P29369	AGMR_PSEAE	>sp|P29369|AGMR_PSEAE Glycerol metabolism activator OS=Pseudomonas aeruginosa (strain ATCC 15692 / DSM 22644 / CIP 104116 / JCM 14847 / LMG 12228 / 1C / PRS 101 / PAO1) OX=208964 GN=agmR PE=3 SV=1	24424	3067.23	17204.3	13407.1	12053.4	15271	17199.5	17669.2	9985.88	11947.5	2675.92	NaN	6863.75	2001.4	2526.86	4662.01	3992.56	1683.93	6746.91	NaN	5.67441	11563.9	1352.33	3935.35	4900.74	4589.27	10782.1	6938.66	174.184	8718.08	5923.61	13394.4	5152.54	16466.3	2397.36	10335.7	9589.44	6371.71	1068.68	5169.73
P29436	P29436	rpmH	Large ribosomal subunit protein bL34	P29436	RL34_PSEAE	>sp|P29436|RL34_PSEAE Large ribosomal subunit protein bL34 OS=Pseudomonas aeruginosa (strain ATCC 15692 / DSM 22644 / CIP 104116 / JCM 14847 / LMG 12228 / 1C / PRS 101 / PAO1) OX=208964 GN=rpmH PE=1 SV=2	5209.23	499581	534741	515040	622360	429265	758843	411873	261982	432455	413822	461039	601009	377791	792777	931251	990912	601361	123240	539059	525279	381538	454904	541692	418505	665600	835433	591549	756152	724961	550543	799722	610109	446669	1.00326e+06	1.12863e+06	755393	735689	810273	477572
P30417	P30417	fkl	Probable FKBP-type 25 kDa peptidyl-prolyl cis-trans isomerase	P30417	FKBZ_PSEAE	>sp|P30417|FKBZ_PSEAE Probable FKBP-type 25 kDa peptidyl-prolyl cis-trans isomerase OS=Pseudomonas aeruginosa (strain ATCC 15692 / DSM 22644 / CIP 104116 / JCM 14847 / LMG 12228 / 1C / PRS 101 / PAO1) OX=208964 GN=fkl PE=3 SV=2	25278.2	9752.49	4800.88	22184.6	6139.32	5878.79	3426.24	26.5375	6547.96	7695.21	1993.31	5669.74	3695.37	9033.29	7534.96	6316.03	2982.68	10264.8	147.987	7461.22	2062.6	7036.91	847.555	5679.08	4942.11	313.436	2571.01	8523.06	7055.45	10636.1	7590.08	1019.77	10157.6	7254.38	4757.31	9974.09	1090.59	1562.21	1564.39	5335.84
P30718	P30718	groEL	Chaperonin GroEL	P30718	CH60_PSEAE	>sp|P30718|CH60_PSEAE Chaperonin GroEL OS=Pseudomonas aeruginosa (strain ATCC 15692 / DSM 22644 / CIP 104116 / JCM 14847 / LMG 12228 / 1C / PRS 101 / PAO1) OX=208964 GN=groEL PE=1 SV=3	57085.9	24040586	28359366	25058008	27175216	29126628	29601882	25991800	26806430	19523400	22770572	23282928	33385840	20649646	25821070	24091590	28646756	20496512	22972166	14824924	14335288	35900128	20617718	20851350	11316721	24063670	29332118	18723812	20374422	19792812	17501978	21584572	19620452	21875546	18635290	21197146	38497688	19299646	23922620	16246338
P30720	P30720	groES	Co-chaperonin GroES	P30720	CH10_PSEAE	>sp|P30720|CH10_PSEAE Co-chaperonin GroES OS=Pseudomonas aeruginosa (strain ATCC 15692 / DSM 22644 / CIP 104116 / JCM 14847 / LMG 12228 / 1C / PRS 101 / PAO1) OX=208964 GN=groES PE=3 SV=1	10266.8	2.90437e+06	4722379	4268146	3591155	5123313	5.09437e+06	9846743	9599894	5.98348e+06	8.29579e+06	6.4039e+06	8803686	7.0249e+06	7789527	3831531	10501038	2.09924e+06	5152012	2.6386e+06	4679166	9989798	4.14295e+06	6918664	4.22027e+06	5.65234e+06	7.44336e+06	7.89072e+06	4.18008e+06	7432365	8.06428e+06	7.74778e+06	7.62526e+06	8419978	7.00709e+06	6.69389e+06	11427370	7.25417e+06	3.51799e+06	4.03433e+06
P30819	P30819	nadC	Nicotinate-nucleotide pyrophosphorylase [carboxylating]	P30819	NADC_PSEAE	>sp|P30819|NADC_PSEAE Nicotinate-nucleotide pyrophosphorylase [carboxylating] OS=Pseudomonas aeruginosa (strain ATCC 15692 / DSM 22644 / CIP 104116 / JCM 14847 / LMG 12228 / 1C / PRS 101 / PAO1) OX=208964 GN=nadC PE=3 SV=2	30551.8	91027.5	96704.1	91325.9	93573.7	96586.5	52372.9	58163.3	35600.7	52171.2	56164.7	46008.3	62853.8	55904.3	60812.1	48798.4	64051.3	62727.4	70323.3	55148.1	37100.2	45118.4	78468.7	53309.9	45033.2	65444	43789.4	50793.1	53268.1	35192.2	27633.2	48843	69662.8	47888.2	45526.4	49014.5	41387.2	56865.9	43857.3	48539.2
P31961	P31961	edd	Phosphogluconate dehydratase	P31961	EDD_PSEAE	>sp|P31961|EDD_PSEAE Phosphogluconate dehydratase OS=Pseudomonas aeruginosa (strain ATCC 15692 / DSM 22644 / CIP 104116 / JCM 14847 / LMG 12228 / 1C / PRS 101 / PAO1) OX=208964 GN=edd PE=3 SV=3	65182.5	246994	259347	255216	262156	260054	390873	823721	997871	742855	682907	478919	509508	630874	580525	785611	157200	719620	1.14271e+06	790263	678761	514271	576204	548224	238751	140228	454670	736009	126889	605355	595992	460429	800024	753824	138841	192620	913582	755269	199192	570807
P32265	P32265	nfxB	HTH-type transcriptional regulator NfxB	P32265	NFXB_PSEAE	>sp|P32265|NFXB_PSEAE HTH-type transcriptional regulator NfxB OS=Pseudomonas aeruginosa (strain ATCC 15692 / DSM 22644 / CIP 104116 / JCM 14847 / LMG 12228 / 1C / PRS 101 / PAO1) OX=208964 GN=nfxB PE=4 SV=2	21077.1	31800	36800.7	23369.9	28810	40404.1	37323.3	79170.9	62142.5	49014.5	47712.6	44302.3	50853.9	61521.4	40898.8	30352.7	44705.2	42259.3	76864.4	34015.7	57853.1	34513.4	46839.9	47268.6	57231	51217.7	57101.4	72948.1	47319.9	75334.9	81966.9	45252.1	89305	76249.2	49526.5	84589.3	50891.5	59629.9	28043.1	49490
P32722	P32722	oprD	Porin D	P32722	PORD_PSEAE	>sp|P32722|PORD_PSEAE Porin D OS=Pseudomonas aeruginosa (strain ATCC 15692 / DSM 22644 / CIP 104116 / JCM 14847 / LMG 12228 / 1C / PRS 101 / PAO1) OX=208964 GN=oprD PE=1 SV=1	48360.3	1.94792e+06	2.29413e+06	1847735	2.33006e+06	2.09222e+06	7787.17	1.90246e+06	392802	113949	642297	161269	93282.9	318001	93322.5	72283.7	33730.2	62939.1	9671.96	33133.8	70109.9	45150.6	2479938	1802312	691993	852097	5582640	835695	1.68519e+06	1.96411e+06	1.57117e+06	2008203	1711179	1.76899e+06	42389.5	1.30387e+06	872994	51145.6	290660	532344
P32977	P32977	oprO	Porin O	P32977	PORO_PSEAE	>sp|P32977|PORO_PSEAE Porin O OS=Pseudomonas aeruginosa (strain ATCC 15692 / DSM 22644 / CIP 104116 / JCM 14847 / LMG 12228 / 1C / PRS 101 / PAO1) OX=208964 GN=oprO PE=1 SV=1	47787.6	153853	176562	171550	182986	175066	875993	7029.36	3820.61	6700.18	11386.8	94805	54323.7	172833	51757.8	1.87946e+06	3463.67	6019.98	17423.7	758546	12806.6	133317	68188.9	7390.78	5020.34	3781.18	3390.27	10841.6	2498.46	8791.5	5588.36	5788.42	9404.67	5795.79	4535.87	5975.27	1240.27	5435.59	7427.7	5151.75
P33639	P33639	pilS	Sensor protein kinase PilS	P33639	PILS_PSEAE	>sp|P33639|PILS_PSEAE Sensor protein kinase PilS OS=Pseudomonas aeruginosa (strain ATCC 15692 / DSM 22644 / CIP 104116 / JCM 14847 / LMG 12228 / 1C / PRS 101 / PAO1) OX=208964 GN=pilS PE=1 SV=1	58985.2	29714.2	27843.7	28658	28674.4	29162.8	32649.2	24299.4	26122.3	17860	21400.6	19872.6	25068.8	16231.6	20135.3	34848	16342.2	24908.8	24918.2	36120.3	11250.6	31735.9	36302.8	24152.6	20976.8	17914.4	27170.4	23345.9	22684.8	20719.8	22338	25555.8	25904.3	24345.2	23993.9	16334.8	12609.2	25657.2	30014.5	18289.3
P33640	P33640	rluD	Ribosomal large subunit pseudouridine synthase D	P33640	RLUD_PSEAE	>sp|P33640|RLUD_PSEAE Ribosomal large subunit pseudouridine synthase D OS=Pseudomonas aeruginosa (strain ATCC 15692 / DSM 22644 / CIP 104116 / JCM 14847 / LMG 12228 / 1C / PRS 101 / PAO1) OX=208964 GN=rluD PE=3 SV=2	35624.9	109975	135228	125360	123420	127321	129557	128695	105197	128692	123056	111716	128090	98117.7	126966	147366	227463	109709	124089	103451	24689	114021	65866.3	129701	143857	138105	152321	132820	164296	130969	152572	150827	145990	136503	188771	178322	163931	125405	97122.9	127259
P33641	P33641	bamD	Outer membrane protein assembly factor BamD	P33641	BAMD_PSEAE	>sp|P33641|BAMD_PSEAE Outer membrane protein assembly factor BamD OS=Pseudomonas aeruginosa (strain ATCC 15692 / DSM 22644 / CIP 104116 / JCM 14847 / LMG 12228 / 1C / PRS 101 / PAO1) OX=208964 GN=bamD PE=3 SV=2	38615	540731	553133	541284	553953	527394	522134	319601	329018	352004	284419	338399	395657	267413	369918	484676	345968	433188	365142	362047	267765	386914	338501	306161	356789	447763	395532	316419	320137	310039	313278	332412	290086	334923	369508	458643	390215	284503	329946	315976
P33642	P33642	thiO	Glycine oxidase	P33642	GLYOX_PSEAE	>sp|P33642|GLYOX_PSEAE Glycine oxidase OS=Pseudomonas aeruginosa (strain ATCC 15692 / DSM 22644 / CIP 104116 / JCM 14847 / LMG 12228 / 1C / PRS 101 / PAO1) OX=208964 GN=thiO PE=3 SV=3	39445.2	78661.1	85703.1	85864.4	84819.6	84960.4	109433	83627.8	74038.9	85209.5	85569.3	70795.9	79788.9	77938.3	74649.5	51108.2	98530.3	110580	84400.3	125030	39895.9	71662.2	60344.7	95347.2	97803.2	100007	111005	120307	79071.5	70285.5	67234	74224.6	83245.6	75406.3	59638.1	83187.2	67137.4	77743.2	104613	53960.8
P33663	P33663	PA4543	Purine nucleoside phosphorylase PA4543	P33663	PURNU_PSEAE	>sp|P33663|PURNU_PSEAE Purine nucleoside phosphorylase PA4543 OS=Pseudomonas aeruginosa (strain ATCC 15692 / DSM 22644 / CIP 104116 / JCM 14847 / LMG 12228 / 1C / PRS 101 / PAO1) OX=208964 GN=PA4543 PE=3 SV=2	26047.5	18028.9	24430.4	20948.2	23968.3	21221.7	23641.6	27620.7	32630.5	38394.4	34112.2	26191	30367.1	21303.4	24331.6	19320.4	30021.9	35882.7	43991.7	25517.1	8521.65	30484.7	19586.1	26938.6	32541.1	22549.2	27021.6	31037.6	24634.5	30550.7	24419.4	24736	36754.3	23682.1	17398.3	24303.1	27089.5	29619.8	17628.7	21102.6
P33883	P33883	lasI	Acyl-homoserine-lactone synthase	P33883	LASI_PSEAE	>sp|P33883|LASI_PSEAE Acyl-homoserine-lactone synthase OS=Pseudomonas aeruginosa (strain ATCC 15692 / DSM 22644 / CIP 104116 / JCM 14847 / LMG 12228 / 1C / PRS 101 / PAO1) OX=208964 GN=lasI PE=1 SV=1	22691.3	8545.3	7296.13	6571.69	7339.64	10439.2	47628.3	15590.9	12575.1	13737.9	14658.1	21380.6	19984.3	27307.2	23060.2	10773.3	65490.1	94783.1	24832.2	12007.6	8690.37	10552.8	39057.7	192707	153468	279747	25610.8	15499.2	12566.3	9566.08	8073.29	22468.5	8768.49	10499.3	4077.32	9508.47	11105.9	9847.69	9599.47	8208.85
P34002	P34002	aroB	3-dehydroquinate synthase	P34002	AROB_PSEAE	>sp|P34002|AROB_PSEAE 3-dehydroquinate synthase OS=Pseudomonas aeruginosa (strain ATCC 15692 / DSM 22644 / CIP 104116 / JCM 14847 / LMG 12228 / 1C / PRS 101 / PAO1) OX=208964 GN=aroB PE=3 SV=2	40109.1	160370	163900	150695	159074	153895	121045	81407.3	118231	134404	165028	66841.2	146253	128144	146936	119215	141511	157231	66570.4	100966	19676.2	61276.3	128184	124880	116223	113046	130066	151191	106044	168256	151016	154687	168372	114521	113662	133836	106716	167286	148318	105991
P34003	P34003	aroK	Shikimate kinase	P34003	AROK_PSEAE	>sp|P34003|AROK_PSEAE Shikimate kinase OS=Pseudomonas aeruginosa (strain ATCC 15692 / DSM 22644 / CIP 104116 / JCM 14847 / LMG 12228 / 1C / PRS 101 / PAO1) OX=208964 GN=aroK PE=3 SV=2	19237.3	54595.1	64357.6	65627.3	73450.7	70116.5	81899.5	51259.6	53497	36146.7	29040.8	33991.4	38498.9	29058.7	25404.6	58578.4	37001.3	40991.2	9350.47	35651.8	5139.81	30510.7	33566.1	55014.1	54351.8	38600.5	58502.8	57374.7	22768.1	40047.1	46947.6	53652.6	45601.3	31848.1	50746.9	38675	37685.1	35745.9	22959	37552
P34750	P34750	pilQ	Fimbrial assembly protein PilQ	P34750	PILQ_PSEAE	>sp|P34750|PILQ_PSEAE Fimbrial assembly protein PilQ OS=Pseudomonas aeruginosa (strain ATCC 15692 / DSM 22644 / CIP 104116 / JCM 14847 / LMG 12228 / 1C / PRS 101 / PAO1) OX=208964 GN=pilQ PE=1 SV=2	77378.9	654474	659339	663539	682157	630796	1.1355e+06	470323	517544	263140	247714	376977	359347	224398	318293	1.84783e+06	406385	181472	508875	144797	279194	885287	1107924	763365	629706	91860.8	697061	473362	1.00545e+06	441416	599139	1.00613e+06	446652	486605	1.02895e+06	26820.8	143184	627343	1.30747e+06	156692
P35483	P35483	phoA	Alkaline phosphatase H	P35483	PPBH_PSEAE	>sp|P35483|PPBH_PSEAE Alkaline phosphatase H OS=Pseudomonas aeruginosa (strain ATCC 15692 / DSM 22644 / CIP 104116 / JCM 14847 / LMG 12228 / 1C / PRS 101 / PAO1) OX=208964 GN=phoA PE=1 SV=2	50408.6	18088.6	19162.6	17087.8	19361.4	19794	5340.1	8287.21	7832.91	14178.6	14646.9	11511.9	14255.8	17486.2	36657.8	39053.8	17447.3	14439.3	11299.3	33039	17485.9	9338.38	8284.02	7560.56	4915.89	11919.7	13056.2	22121	98.3236	4458.92	11513.1	5818.77	7263	11490.7	3235.34	26014.4	8234.23	9044.88	8761.7	1957.01
P35818	P35818	xcpQ	Secretin XcpQ	P35818	GSPD_PSEAE	>sp|P35818|GSPD_PSEAE Secretin XcpQ OS=Pseudomonas aeruginosa (strain ATCC 15692 / DSM 22644 / CIP 104116 / JCM 14847 / LMG 12228 / 1C / PRS 101 / PAO1) OX=208964 GN=xcpQ PE=1 SV=1	69953.2	48403.4	61001.7	56536.1	59583.9	55098.2	78444.8	125962	116537	143737	115234	84521	109658	121974	117557	59817.3	65595.7	89617.2	85729.9	48800.3	86771.8	158845	67993	103498	100626	68310.7	70380.2	146803	112094	145043	135323	56019.5	122402	143887	38119	41637.6	104554	158881	80731	109567
P37452	P37452	lexA	LexA repressor	P37452	LEXA_PSEAE	>sp|P37452|LEXA_PSEAE LexA repressor OS=Pseudomonas aeruginosa (strain ATCC 15692 / DSM 22644 / CIP 104116 / JCM 14847 / LMG 12228 / 1C / PRS 101 / PAO1) OX=208964 GN=lexA PE=1 SV=1	22505.9	67274.3	70366.4	67266.6	72082.2	67440.4	63812	54766.3	60504.6	46693.7	53262	54596.9	52155.7	53136	48503.1	64083.9	53188.8	45879.6	64375.5	48120.5	60134.6	54744.3	62574.8	53794.2	53743.2	54454.9	55817.8	62142	59395.6	67922.3	65665.2	56478.6	53712	58753.1	61712.4	66827.2	62204.7	62945.1	60128.2	56417.5
P37798	P37798	accC	Biotin carboxylase	P37798	ACCC_PSEAE	>sp|P37798|ACCC_PSEAE Biotin carboxylase OS=Pseudomonas aeruginosa (strain ATCC 15692 / DSM 22644 / CIP 104116 / JCM 14847 / LMG 12228 / 1C / PRS 101 / PAO1) OX=208964 GN=accC PE=1 SV=1	48887.9	1.96273e+06	1.79157e+06	1.77388e+06	1.89988e+06	1.82773e+06	2010043	2515576	2.36768e+06	2.20776e+06	2.40653e+06	1.75038e+06	2.26925e+06	2.35407e+06	2.23479e+06	2.64353e+06	3.12777e+06	2.29588e+06	2830903	2.18876e+06	1.78589e+06	2.38181e+06	2874690	2.789e+06	2.05014e+06	2.27202e+06	2.70094e+06	2.84731e+06	2976480	2.70433e+06	2.82582e+06	2.95603e+06	2.78558e+06	2945962	3.75413e+06	3.25628e+06	3524812	2.77278e+06	3.05005e+06	2.63653e+06
P37799	P37799	accB	Biotin carboxyl carrier protein of acetyl-CoA carboxylase	P37799	BCCP_PSEAE	>sp|P37799|BCCP_PSEAE Biotin carboxyl carrier protein of acetyl-CoA carboxylase OS=Pseudomonas aeruginosa (strain ATCC 15692 / DSM 22644 / CIP 104116 / JCM 14847 / LMG 12228 / 1C / PRS 101 / PAO1) OX=208964 GN=accB PE=3 SV=1	16454.9	857870	772203	789260	889716	940794	834034	1.11047e+06	1143827	989251	1.00044e+06	843653	1.00735e+06	1.32478e+06	1.12834e+06	1.33213e+06	1.57178e+06	579844	828015	783349	347604	564397	944690	1.13811e+06	1.13268e+06	941647	1.19768e+06	1.66975e+06	1.13608e+06	1.46217e+06	1.4787e+06	1556705	1330203	1.14661e+06	1.76848e+06	2.32883e+06	1662769	981245	949436	1168211
P37860	P37860	recX	Regulatory protein RecX	P37860	RECX_PSEAE	>sp|P37860|RECX_PSEAE Regulatory protein RecX OS=Pseudomonas aeruginosa (strain ATCC 15692 / DSM 22644 / CIP 104116 / JCM 14847 / LMG 12228 / 1C / PRS 101 / PAO1) OX=208964 GN=recX PE=3 SV=2	17424.8	4390.25	7420.93	7819.73	7486.99	8031.46	6113.86	6139.51	11386.5	8046.52	7606.17	2779.8	10608.4	4174.52	7139.3	8398.03	9485.15	10583.6	5675.56	6154.36	2966.9	5260.16	10860.7	7914.32	12936.5	7295.61	9071.83	13332.1	7263.53	14164.2	15165.8	10753.8	8623.35	11947.7	3927.03	21405	12545.6	10111.5	3080.94	6377.04
P38098	P38098	carA	Carbamoyl phosphate synthase small chain	P38098	CARA_PSEAE	>sp|P38098|CARA_PSEAE Carbamoyl phosphate synthase small chain OS=Pseudomonas aeruginosa (strain ATCC 15692 / DSM 22644 / CIP 104116 / JCM 14847 / LMG 12228 / 1C / PRS 101 / PAO1) OX=208964 GN=carA PE=3 SV=1	40828.2	251710	380347	328476	400330	331899	304729	182224	258307	306702	235597	119720	229167	206402	203699	220450	281048	181346	215980	193807	45218.9	196592	205197	204592	198737	320499	258823	353430	224203	416917	362595	281676	207131	308866	337310	404497	310774	349620	187735	216669
P38100	P38100	carB	Carbamoyl phosphate synthase large chain	P38100	CARB_PSEAE	>sp|P38100|CARB_PSEAE Carbamoyl phosphate synthase large chain OS=Pseudomonas aeruginosa (strain ATCC 15692 / DSM 22644 / CIP 104116 / JCM 14847 / LMG 12228 / 1C / PRS 101 / PAO1) OX=208964 GN=carB PE=3 SV=3	117332	1.13234e+06	1.18194e+06	1.14101e+06	1159957	1.12125e+06	803715	542430	584937	602863	622977	678358	604369	672664	605830	787232	792325	767212	701874	891027	594323	629584	755783	738222	419862	902829	905297	668220	736533	623818	638817	797779	649207	582213	877278	831396	885680	678397	955846	674583
P38103	P38103	dapB	4-hydroxy-tetrahydrodipicolinate reductase	P38103	DAPB_PSEAE	>sp|P38103|DAPB_PSEAE 4-hydroxy-tetrahydrodipicolinate reductase OS=Pseudomonas aeruginosa (strain ATCC 15692 / DSM 22644 / CIP 104116 / JCM 14847 / LMG 12228 / 1C / PRS 101 / PAO1) OX=208964 GN=dapB PE=1 SV=2	28324.4	503859	463706	475117	490013	486327	521492	757255	671992	622318	614330	694386	684986	639300	624810	458494	642976	542009	543671	469582	631553	723234	570539	604027	521583	508315	617151	534965	523092	516060	538692	582868	459868	788395	646380	563476	1.25891e+06	556265	558646	653205
P38107	P38107	mucA	Sigma factor AlgU negative regulatory protein	P38107	MUCA_PSEAE	>sp|P38107|MUCA_PSEAE Sigma factor AlgU negative regulatory protein OS=Pseudomonas aeruginosa (strain ATCC 15692 / DSM 22644 / CIP 104116 / JCM 14847 / LMG 12228 / 1C / PRS 101 / PAO1) OX=208964 GN=mucA PE=1 SV=1	20998.7	43931.4	44532.6	36071.8	64769.6	40988.7	44502.4	43077.2	45667.4	67653.4	63366.9	24959.7	67015.3	42286.7	41755.9	81115.2	61640	77680.9	67822.7	34099.3	28654	41811.4	56347.2	69298.4	50960.6	96547.3	50730.6	65772.1	76202.5	120483	79750.9	71835.5	59452.9	60739.2	61889.3	272266	70731.1	107459	66589.7	61550
P38108	P38108	mucB	Sigma factor AlgU regulatory protein MucB	P38108	MUCB_PSEAE	>sp|P38108|MUCB_PSEAE Sigma factor AlgU regulatory protein MucB OS=Pseudomonas aeruginosa (strain ATCC 15692 / DSM 22644 / CIP 104116 / JCM 14847 / LMG 12228 / 1C / PRS 101 / PAO1) OX=208964 GN=mucB PE=1 SV=1	34572.2	66751.6	83857.6	81904.5	80894.5	77121.2	80714	157976	173510	146169	184827	91808.1	168756	143423	146590	64406	180278	114938	235428	80418.4	67880.9	154106	101447	96246.1	130548	166535	72979.1	168293	131171	211792	154854	95747.6	168557	173649	105820	258283	147804	190192	82562.1	173199
P40695	P40695	plcR	Phospholipase C accessory protein PlcR	P40695	PLCR_PSEAE	>sp|P40695|PLCR_PSEAE Phospholipase C accessory protein PlcR OS=Pseudomonas aeruginosa (strain ATCC 15692 / DSM 22644 / CIP 104116 / JCM 14847 / LMG 12228 / 1C / PRS 101 / PAO1) OX=208964 GN=plcR PE=3 SV=1	23029	2823.2	2544.82	2099.08	4699.75	4788.03	7514.64	8958.6	7020.9	4199.86	13064.5	8303.83	12674.6	12839.6	12187.6	6059.4	6530.36	5603.66	9083.63	5172.04	10744.3	7361.23	13270.2	7897.9	3443.8	10251.8	6894.76	8476.95	6253.36	9349.57	6188.3	6484.2	7274.1	9236.98	5078.28	20846.9	2777.24	7458.11	6556.2	7264.5
P40882	P40882	PA3753	Uncharacterized protein PA3753	P40882	Y3753_PSEAE	>sp|P40882|Y3753_PSEAE Uncharacterized protein PA3753 OS=Pseudomonas aeruginosa (strain ATCC 15692 / DSM 22644 / CIP 104116 / JCM 14847 / LMG 12228 / 1C / PRS 101 / PAO1) OX=208964 GN=PA3753 PE=3 SV=2	18509.2	134466	137038	126920	128409	137828	76230.1	97947.9	240329	159504	196670	129451	114044	173900	114982	40704.9	66982.4	99019.1	263249	86561.6	162582	207667	124022	92352.3	128028	80513.6	104672	162936	100998	167118	104578	89932.8	107996	120650	35261.5	49803.1	67090.4	147011	74535.2	131160
P40883	P40883	pchR	Regulatory protein PchR	P40883	PCHR_PSEAE	>sp|P40883|PCHR_PSEAE Regulatory protein PchR OS=Pseudomonas aeruginosa (strain ATCC 15692 / DSM 22644 / CIP 104116 / JCM 14847 / LMG 12228 / 1C / PRS 101 / PAO1) OX=208964 GN=pchR PE=2 SV=1	32339.1	18667.7	18539.4	17444.5	20830.1	19547.8	28495.7	5289.43	3809.89	8216.13	3828.41	17108.2	4568.15	5663.96	6180.49	29649.8	6674.28	11819.9	3897.93	11447.4	9579.49	6565.86	9563.75	11379.2	8320.42	17585	16811.7	4957.16	5885.23	11123.2	4209.21	27047.1	4798.61	11862.8	19540.9	8843.76	18681.1	6305.74	14529.9	10210
P40947	P40947	ssb	Single-stranded DNA-binding protein	P40947	SSB_PSEAE	>sp|P40947|SSB_PSEAE Single-stranded DNA-binding protein OS=Pseudomonas aeruginosa (strain ATCC 15692 / DSM 22644 / CIP 104116 / JCM 14847 / LMG 12228 / 1C / PRS 101 / PAO1) OX=208964 GN=ssb PE=1 SV=3	18557.5	1.59544e+06	1.72616e+06	1.84444e+06	1.73556e+06	1750709	1.50082e+06	1223731	1.50802e+06	1.2169e+06	1.59608e+06	1.20395e+06	1.47232e+06	1.1894e+06	1.27416e+06	1.38711e+06	1.53092e+06	1137877	851046	1.02879e+06	742720	1.32503e+06	1.2445e+06	1.4569e+06	1631115	1.51059e+06	1.45304e+06	1.54629e+06	1.22376e+06	1.39561e+06	1.34014e+06	1.35037e+06	1.28503e+06	1.3153e+06	1.47368e+06	2.15737e+06	1.6477e+06	1337498	1.25757e+06	1.12889e+06
P42257	P42257	pilJ	Protein PilJ	P42257	PILJ_PSEAE	>sp|P42257|PILJ_PSEAE Protein PilJ OS=Pseudomonas aeruginosa (strain ATCC 15692 / DSM 22644 / CIP 104116 / JCM 14847 / LMG 12228 / 1C / PRS 101 / PAO1) OX=208964 GN=pilJ PE=1 SV=1	72528.3	1.03775e+06	1.01299e+06	1.00973e+06	1.00864e+06	954601	1.33316e+06	501637	539214	40036.3	395985	521719	513563	369481	447209	1544600	510744	263890	574416	792188	255167	898930	966217	634028	667016	517400	818706	607727	691208	432217	587993	877974	576816	498672	907903	129008	181639	549592	1093629	318035
P42378	P42378	rpoH	RNA polymerase sigma factor RpoH	P42378	RPOH_PSEAE	>sp|P42378|RPOH_PSEAE RNA polymerase sigma factor RpoH OS=Pseudomonas aeruginosa (strain ATCC 15692 / DSM 22644 / CIP 104116 / JCM 14847 / LMG 12228 / 1C / PRS 101 / PAO1) OX=208964 GN=rpoH PE=3 SV=2	32580.9	15831.9	13882.6	14098.6	14263.7	16416.7	8663.79	8619.98	9806.15	6597.84	14048.9	13925.2	10073.9	12026.2	12086.5	13628.8	16511.8	4412.72	6086.89	8568.14	7657.07	9777.88	7385.58	6339.87	3613.34	11753.3	5913	7590.35	7860.88	6900.54	7732.46	4756.39	5209.03	8052.35	8650.7	10416.4	21949.6	4917.93	11928.4	7485.86
P42512	P42512	fptA	Fe(3+)-pyochelin receptor	P42512	FPTA_PSEAE	>sp|P42512|FPTA_PSEAE Fe(3+)-pyochelin receptor OS=Pseudomonas aeruginosa (strain ATCC 15692 / DSM 22644 / CIP 104116 / JCM 14847 / LMG 12228 / 1C / PRS 101 / PAO1) OX=208964 GN=fptA PE=1 SV=1	79992.1	405545	492358	451201	493942	491154	1.35015e+06	89559.9	7055.05	167730	99396.9	635408	273452	273285	208842	673992	20774.4	234418	128055	356982	113455	657443	154285	585847	93123.6	254708	623970	21078.2	4519.27	190394	16662.7	741669	46270.3	442930	14382	18419.9	205245	96080.6	497046	567786
P42513	P42513	fptB	Protein FptB	P42513	FPTB_PSEAE	>sp|P42513|FPTB_PSEAE Protein FptB OS=Pseudomonas aeruginosa (strain ATCC 15692 / DSM 22644 / CIP 104116 / JCM 14847 / LMG 12228 / 1C / PRS 101 / PAO1) OX=208964 GN=fptB PE=3 SV=1	9569.36	5545.7	4102.13	5245.81	2483.49	3098.3	31190.8	2255.77	7319.26	7340.89	8826.63	18074.4	5948.78	5984.43	8876.26	21997.6	NaN	16188.7	4010.66	9136.04	NaN	2502.04	2501.24	5908.05	4526.82	3369.47	6855.61	5791.8	838.947	7273.03	5131.68	17031.2	3049.42	9977.59	2818.33	NaN	5191.99	17.0695	9799.99	19709.1
P42514	P42514	PA4219	Uncharacterized protein PA4219	P42514	Y4219_PSEAE	>sp|P42514|Y4219_PSEAE Uncharacterized protein PA4219 OS=Pseudomonas aeruginosa (strain ATCC 15692 / DSM 22644 / CIP 104116 / JCM 14847 / LMG 12228 / 1C / PRS 101 / PAO1) OX=208964 GN=PA4219 PE=4 SV=1	42249.1	31512.7	13708.4	25397.3	9985.77	4011.83	106293	4257.36	27019.2	54251.7	27431.4	37966.8	46057.4	13490.6	42283.1	54167.4	576.294	182683	10879.1	37758.4	11624.2	44876.7	66349.9	32076.9	26961.2	21384.3	34203.7	9158.54	5212.96	24072.8	99843.6	69410	19748	59005	10179.1	NaN	9211.25	11005.3	60944.7	40623.4
P42805	P42805	ispE	4-diphosphocytidyl-2-C-methyl-D-erythritol kinase	P42805	ISPE_PSEAE	>sp|P42805|ISPE_PSEAE 4-diphosphocytidyl-2-C-methyl-D-erythritol kinase OS=Pseudomonas aeruginosa (strain ATCC 15692 / DSM 22644 / CIP 104116 / JCM 14847 / LMG 12228 / 1C / PRS 101 / PAO1) OX=208964 GN=ispE PE=3 SV=2	30843.3	85286.6	99990.2	90461.1	95640	101375	76872	58703.7	55608.5	63196.8	64267.1	53631.9	56945.2	55904	65580	59920.8	65198.8	66723.1	60227.2	58402.7	58074.4	63263.3	60819.1	71089.1	74736.9	79502.3	69281.5	68196.9	47438.1	63969	66158.6	64171.6	68105.1	62042.4	36364.4	52453.9	61331.9	60318.1	48377.1	65189.2
P42806	P42806	prfA	Peptide chain release factor 1	P42806	RF1_PSEAE	>sp|P42806|RF1_PSEAE Peptide chain release factor 1 OS=Pseudomonas aeruginosa (strain ATCC 15692 / DSM 22644 / CIP 104116 / JCM 14847 / LMG 12228 / 1C / PRS 101 / PAO1) OX=208964 GN=prfA PE=3 SV=2	40040.7	76466.1	70860.9	70863.5	70860.4	70552	74233.1	78614.1	83420.9	76290.4	100433	95816.8	89496.3	112972	109473	102893	162688	87734.4	102804	120531	96514.9	74209	85096	89183.1	103533	96730.5	91268.6	103873	113052	89042.6	117707	98690.9	99263.9	88904.5	119471	102304	107237	84916.7	98638.6	98595.5
P42807	P42807	hemA	Glutamyl-tRNA reductase	P42807	HEM1_PSEAE	>sp|P42807|HEM1_PSEAE Glutamyl-tRNA reductase OS=Pseudomonas aeruginosa (strain ATCC 15692 / DSM 22644 / CIP 104116 / JCM 14847 / LMG 12228 / 1C / PRS 101 / PAO1) OX=208964 GN=hemA PE=3 SV=3	46123.8	94479.7	91751.5	90094.8	83506.4	81014.6	61898.4	33807.9	37494.8	51842.5	41759.9	41870.5	47490.2	41924.3	50134.8	65527.2	81839.6	41376.1	16793.9	38396.5	12392.1	24117	47933.3	34556.1	56968.5	66288.1	53433.1	45763.6	37499.4	44349.5	50587.5	44646.2	43905.8	38607.2	49211.9	95242.2	55021.7	41119.2	44028.2	46702.9
P42810	P42810	PA4667	TPR repeat-containing protein PA4667	P42810	Y4667_PSEAE	>sp|P42810|Y4667_PSEAE TPR repeat-containing protein PA4667 OS=Pseudomonas aeruginosa (strain ATCC 15692 / DSM 22644 / CIP 104116 / JCM 14847 / LMG 12228 / 1C / PRS 101 / PAO1) OX=208964 GN=PA4667 PE=1 SV=2	66290.6	203816	176191	178540	179767	176866	209582	154515	159350	162312	185693	210277	217850	206382	214440	176460	180399	298683	178911	197344	163362	157632	180402	159137	206619	216668	166001	157229	137546	168005	157156	160391	143280	157146	146877	171849	181005	165408	191548	174900
P42812	P42812	lolB	Outer-membrane lipoprotein LolB	P42812	LOLB_PSEAE	>sp|P42812|LOLB_PSEAE Outer-membrane lipoprotein LolB OS=Pseudomonas aeruginosa (strain ATCC 15692 / DSM 22644 / CIP 104116 / JCM 14847 / LMG 12228 / 1C / PRS 101 / PAO1) OX=208964 GN=lolB PE=3 SV=2	23028	92123.8	90762.5	86923.1	87807.3	79006.1	88693.8	58424.6	67902.3	77947.8	60950.3	63861.9	74820	58536.1	67045.2	52384.6	64382.7	78915.3	57478.3	75704.9	55803.4	69250.3	50616.7	64968.9	69232.1	76457.4	67300.1	50575.6	50521	48508.7	58264	65084.4	53604.9	49431.4	51328.7	69227.8	74278.3	62068.5	63993.6	65664.7
P43334	P43334	phhA	Phenylalanine-4-hydroxylase	P43334	PH4H_PSEAE	>sp|P43334|PH4H_PSEAE Phenylalanine-4-hydroxylase OS=Pseudomonas aeruginosa (strain ATCC 15692 / DSM 22644 / CIP 104116 / JCM 14847 / LMG 12228 / 1C / PRS 101 / PAO1) OX=208964 GN=phhA PE=3 SV=2	30321.9	300062	414139	382076	381610	381018	406300	246478	383264	361748	212613	66406.1	209814	175443	210793	352827	283100	161061	160294	136599	263437	121954	257670	289199	249334	243921	420777	485289	366070	604311	556140	512120	454667	231704	375410	234858	183908	289289	114212	205337
P43335	P43335	phhB	Pterin-4-alpha-carbinolamine dehydratase	P43335	PHS_PSEAE	>sp|P43335|PHS_PSEAE Pterin-4-alpha-carbinolamine dehydratase OS=Pseudomonas aeruginosa (strain ATCC 15692 / DSM 22644 / CIP 104116 / JCM 14847 / LMG 12228 / 1C / PRS 101 / PAO1) OX=208964 GN=phhB PE=3 SV=1	13333.2	518535	439917	469495	414117	410293	490857	793559	759144	512994	897570	795089	660422	847458	715669	395625	674098	261214	608961	503868	786431	1.00221e+06	751294	864085	897265	575676	613028	714094	499814	739190	785475	799853	617913	779822	408855	214262	378986	743415	752393	838579
P43336	P43336	phhC	Aromatic-amino-acid aminotransferase	P43336	PHHC_PSEAE	>sp|P43336|PHHC_PSEAE Aromatic-amino-acid aminotransferase OS=Pseudomonas aeruginosa (strain ATCC 15692 / DSM 22644 / CIP 104116 / JCM 14847 / LMG 12228 / 1C / PRS 101 / PAO1) OX=208964 GN=phhC PE=3 SV=2	43273.4	667885	837131	810496	816541	895478	1.03351e+06	1.41335e+06	1503873	1.53973e+06	1.27561e+06	902686	1.34427e+06	990128	1.11153e+06	506124	1078711	497305	1.32929e+06	804549	794859	1.59319e+06	1.08971e+06	1.50895e+06	1.56625e+06	965079	1.28015e+06	1.40447e+06	466477	1.71536e+06	1.45629e+06	1.75593e+06	1.02274e+06	1.49213e+06	977776	473000	727067	1.43315e+06	893083	1.68185e+06
P43501	P43501	pilH	Protein PilH	P43501	PILH_PSEAE	>sp|P43501|PILH_PSEAE Protein PilH OS=Pseudomonas aeruginosa (strain ATCC 15692 / DSM 22644 / CIP 104116 / JCM 14847 / LMG 12228 / 1C / PRS 101 / PAO1) OX=208964 GN=pilH PE=3 SV=1	13273.3	298564	297400	300918	294146	284019	446395	282328	390166	205195	389840	293892	300552	329638	329173	569354	355279	122096	506081	452049	285395	588961	454468	346005	393489	277963	349730	428800	505240	349273	478536	493036	540072	253476	340409	95842.6	152033	437401	552979	220929
P43502	P43502	pilI	Protein PilI	P43502	PILI_PSEAE	>sp|P43502|PILI_PSEAE Protein PilI OS=Pseudomonas aeruginosa (strain ATCC 15692 / DSM 22644 / CIP 104116 / JCM 14847 / LMG 12228 / 1C / PRS 101 / PAO1) OX=208964 GN=pilI PE=4 SV=1	19934.1	29706.6	62988	36623.6	55062.9	69684.3	65774.4	28553.3	22969.2	18961.1	20173.9	14733.1	29266.3	15461.6	17998	60220.4	27587.8	9668.05	26618	17221.5	11505.4	35432.2	46875.9	27017.7	32966.2	25388.2	39277.5	37316.4	25522.8	33840.4	33018.6	55397.5	31119.6	26371.9	41196.7	17146.9	6568.82	34381.5	33331.8	16070.5
P43898	P43898	hemF	Oxygen-dependent coproporphyrinogen-III oxidase	P43898	HEM6_PSEAE	>sp|P43898|HEM6_PSEAE Oxygen-dependent coproporphyrinogen-III oxidase OS=Pseudomonas aeruginosa (strain ATCC 15692 / DSM 22644 / CIP 104116 / JCM 14847 / LMG 12228 / 1C / PRS 101 / PAO1) OX=208964 GN=hemF PE=3 SV=1	34805.9	80102.6	83571.5	78378.3	92131.4	96910	62751.4	75398.3	89848.3	90293.6	91679	76391.1	94307.7	96270.1	100664	120447	172156	65992.5	78198.1	103057	57662.7	81917.2	109048	104723	79432.5	96426.6	79529.1	94000.5	92328.9	91057.3	133672	116094	90417.9	81147.4	166297	88478.8	70120.8	80818.6	98442.9	76840.8
P43903	P43903	qor	Quinone oxidoreductase	P43903	QOR_PSEAE	>sp|P43903|QOR_PSEAE Quinone oxidoreductase OS=Pseudomonas aeruginosa (strain ATCC 15692 / DSM 22644 / CIP 104116 / JCM 14847 / LMG 12228 / 1C / PRS 101 / PAO1) OX=208964 GN=qor PE=3 SV=2	35094.8	87323.9	102764	92256.5	95698	109784	86008.1	163384	229482	216082	219266	115273	288081	140015	218229	36038.6	93443.3	189944	274971	93064.9	83122.8	140956	148932	157719	121824	81316.2	112091	171502	80539.8	244316	177181	99850	208923	164908	43714.5	89029.9	76206.1	247158	66975.4	129152
P43904	P43904	aroE	Shikimate dehydrogenase (NADP(+))	P43904	AROE_PSEAE	>sp|P43904|AROE_PSEAE Shikimate dehydrogenase (NADP(+)) OS=Pseudomonas aeruginosa (strain ATCC 15692 / DSM 22644 / CIP 104116 / JCM 14847 / LMG 12228 / 1C / PRS 101 / PAO1) OX=208964 GN=aroE PE=3 SV=3	29484.7	59300.3	53349.1	49642.3	46819.1	55734.8	45475.4	45132.1	54286.7	58417.8	53007	44669.9	48333	53237.8	54387.8	46591.1	55009.2	39953.8	49522	42883.6	26378.6	32553.8	51041.6	39963.6	52772.5	42339.7	38666.3	60766.2	42634.8	62377.6	68305.6	47459.9	68191.6	35636.8	46420.5	40688.9	30452.6	48974.5	39404.6	36551
P45682	P45682	PA3623	Lipoprotein NlpD/LppB homolog	P45682	NLPD_PSEAE	>sp|P45682|NLPD_PSEAE Lipoprotein NlpD/LppB homolog OS=Pseudomonas aeruginosa (strain ATCC 15692 / DSM 22644 / CIP 104116 / JCM 14847 / LMG 12228 / 1C / PRS 101 / PAO1) OX=208964 GN=PA3623 PE=3 SV=1	30835.3	22435.7	25222.2	28177.7	26823.3	29037.9	56661.3	51579.1	45947	48582.1	35466.1	41381.7	35573.1	30554.3	40315.5	66330.4	38443.9	61630.3	29684.9	45523.3	43171.9	29589.6	56828.2	48666.7	59261.6	42310.2	45051.5	51377.8	59018.1	45382.1	45558.8	52894.6	58937.2	49830.6	60130.1	107052	53667.4	47995.5	49163.8	41178.1
P45683	P45683	pcm	Protein-L-isoaspartate O-methyltransferase	P45683	PIMT_PSEAE	>sp|P45683|PIMT_PSEAE Protein-L-isoaspartate O-methyltransferase OS=Pseudomonas aeruginosa (strain ATCC 15692 / DSM 22644 / CIP 104116 / JCM 14847 / LMG 12228 / 1C / PRS 101 / PAO1) OX=208964 GN=pcm PE=3 SV=2	23406.9	110578	126588	110407	127179	121417	121674	67949.6	59408.2	59606.2	54294.7	49823.1	47320.5	47943.5	43968.9	104651	59124.9	43880.2	64687.3	56725.9	34290.2	58083.6	71244.9	73897.3	68057	87677	88423.7	64118.1	60162.6	65744.6	57613.9	76601.1	60071.4	54311.4	51899.5	59923.8	67979.2	61426.1	69161.3	58622.7
P45684	P45684	rpoS	RNA polymerase sigma factor RpoS	P45684	RPOS_PSEAE	>sp|P45684|RPOS_PSEAE RNA polymerase sigma factor RpoS OS=Pseudomonas aeruginosa (strain ATCC 15692 / DSM 22644 / CIP 104116 / JCM 14847 / LMG 12228 / 1C / PRS 101 / PAO1) OX=208964 GN=rpoS PE=1 SV=1	38235.4	164356	146557	132878	142138	167367	195524	395728	479772	540167	389328	266975	463924	349646	435906	93700	151359	247781	234017	139466	485470	304563	433810	261668	331523	156746	212147	425619	466865	653328	525886	181593	309258	452940	76383.2	105562	389216	547407	170559	399641
P46384	P46384	pilG	Protein PilG	P46384	PILG_PSEAE	>sp|P46384|PILG_PSEAE Protein PilG OS=Pseudomonas aeruginosa (strain ATCC 15692 / DSM 22644 / CIP 104116 / JCM 14847 / LMG 12228 / 1C / PRS 101 / PAO1) OX=208964 GN=pilG PE=1 SV=1	14718.1	688431	738171	719257	776901	725112	936039	359891	469670	234352	376514	374184	332797	378748	390642	1.09881e+06	376422	158432	655176	603427	333019	633140	750844	649700	518944	371892	644610	528336	542741	476888	639910	770120	659708	402028	597827	116943	190937	556028	826186	261082
P47203	P47203	ftsA	Cell division protein FtsA	P47203	FTSA_PSEAE	>sp|P47203|FTSA_PSEAE Cell division protein FtsA OS=Pseudomonas aeruginosa (strain ATCC 15692 / DSM 22644 / CIP 104116 / JCM 14847 / LMG 12228 / 1C / PRS 101 / PAO1) OX=208964 GN=ftsA PE=3 SV=2	44646.1	359222	379404	358814	390077	428563	339527	307389	293383	334872	296730	220807	317480	259598	300815	313656	292005	263847	252316	199173	75182.9	198614	286340	288394	320733	362502	321088	338719	233206	362760	332191	263490	279087	271829	191669	857844	346890	351209	297498	290372
P47204	P47204	ftsZ	Cell division protein FtsZ	P47204	FTSZ_PSEAE	>sp|P47204|FTSZ_PSEAE Cell division protein FtsZ OS=Pseudomonas aeruginosa (strain ATCC 15692 / DSM 22644 / CIP 104116 / JCM 14847 / LMG 12228 / 1C / PRS 101 / PAO1) OX=208964 GN=ftsZ PE=1 SV=2	41218	713835	795621	751690	786766	790431	570766	630263	643279	618196	636824	472372	442070	529898	483286	448138	452697	403396	559132	395863	636223	467082	596495	564918	755964	758953	584983	601079	424335	727259	635948	467287	587977	617996	349039	2365765	749108	624098	406680	596546
P47205	P47205	lpxC	UDP-3-O-acyl-N-acetylglucosamine deacetylase	P47205	LPXC_PSEAE	>sp|P47205|LPXC_PSEAE UDP-3-O-acyl-N-acetylglucosamine deacetylase OS=Pseudomonas aeruginosa (strain ATCC 15692 / DSM 22644 / CIP 104116 / JCM 14847 / LMG 12228 / 1C / PRS 101 / PAO1) OX=208964 GN=lpxC PE=1 SV=2	33435.1	566497	571459	599982	609811	602043	452950	544874	508804	472922	484162	420978	420613	467424	499894	456275	561896	467264	388815	463889	454454	395713	517132	476395	487382	535726	460010	506737	419350	603709	547087	489812	514307	502282	462761	493170	456480	499830	435732	544441
P48246	P48246	hemD	Uroporphyrinogen-III synthase	P48246	HEM4_PSEAE	>sp|P48246|HEM4_PSEAE Uroporphyrinogen-III synthase OS=Pseudomonas aeruginosa (strain ATCC 15692 / DSM 22644 / CIP 104116 / JCM 14847 / LMG 12228 / 1C / PRS 101 / PAO1) OX=208964 GN=hemD PE=1 SV=2	27279.2	41969.7	47607.7	47745	44642.3	48328	37333.4	16375.9	24181.3	23288.2	26944.1	25203.3	21078.2	25958	23696.4	24057.8	23802.5	19299.6	15540.1	23076.8	18876.7	25089	20675.6	22307.2	23841.6	22930.2	27048.2	24340.4	17921.4	22709.7	22730	24989.3	23079.5	17417.4	22521.4	18961.3	12573.2	19580.2	17656.8	26857.2
P48247	P48247	hemL	Glutamate-1-semialdehyde 2,1-aminomutase	P48247	GSA_PSEAE	>sp|P48247|GSA_PSEAE Glutamate-1-semialdehyde 2,1-aminomutase OS=Pseudomonas aeruginosa (strain ATCC 15692 / DSM 22644 / CIP 104116 / JCM 14847 / LMG 12228 / 1C / PRS 101 / PAO1) OX=208964 GN=hemL PE=1 SV=2	45397.9	247695	319605	314450	292549	317890	203741	198121	216186	270779	210461	109428	180106	166294	162841	166935	232170	147833	244153	209176	77177.9	232869	201861	225860	241107	263954	229438	255955	179381	255966	246687	253163	223998	237969	242875	211162	175802	245024	133088	201849
P48372	P48372	gyrA	DNA gyrase subunit A	P48372	GYRA_PSEAE	>sp|P48372|GYRA_PSEAE DNA gyrase subunit A OS=Pseudomonas aeruginosa (strain ATCC 15692 / DSM 22644 / CIP 104116 / JCM 14847 / LMG 12228 / 1C / PRS 101 / PAO1) OX=208964 GN=gyrA PE=3 SV=1	101135	647976	645115	653258	666010	673119	725936	723346	620907	824865	807977	900403	830108	834879	800091	993956	883176	909044	640873	886782	621653	671873	819863	804037	767168	728635	845762	819430	866135	706701	784868	897307	736060	734842	1057350	854915	1.00463e+06	729721	918504	721979
P48632	P48632	fpvA	Ferripyoverdine receptor	P48632	FPVA_PSEAE	>sp|P48632|FPVA_PSEAE Ferripyoverdine receptor OS=Pseudomonas aeruginosa (strain ATCC 15692 / DSM 22644 / CIP 104116 / JCM 14847 / LMG 12228 / 1C / PRS 101 / PAO1) OX=208964 GN=fpvA PE=1 SV=2	91167.1	4880.32	6412.86	8246.62	6996.9	5484.07	43957.6	60003.1	60484.4	52575.4	7346.71	3777.98	4777.36	5448.87	4078.53	5852.85	5079.32	4430.55	79398.9	5012.35	27702.5	6731.96	3478.42	5492.12	5654.34	3259.34	251573	55958.9	2826.11	5372.91	4884.71	3881.98	38619	32758.1	6309.04	47659.2	3864.02	6403.87	181362	3252.1
P48636	P48636	PA4923	Cytokinin riboside 5'-monophosphate phosphoribohydrolase	P48636	LOGH_PSEAE	>sp|P48636|LOGH_PSEAE Cytokinin riboside 5'-monophosphate phosphoribohydrolase OS=Pseudomonas aeruginosa (strain ATCC 15692 / DSM 22644 / CIP 104116 / JCM 14847 / LMG 12228 / 1C / PRS 101 / PAO1) OX=208964 GN=PA4923 PE=1 SV=2	20724.9	6051.16	7865.55	7330.36	8128	7982.02	6881.15	9824.73	13427.2	9974.05	12446.5	7739.45	10538	15897	13883.6	7788.33	19643.9	4803.85	5913.19	9413.12	3126.25	6294.85	8270.37	6543.48	9645.7	6935.23	8695.38	12141.8	12484.5	18859.6	19035.9	13777.2	13439.9	9420.07	12262.8	8868.67	6245.68	9281.52	6731.32	7298.29
P49988	P49988	rpoN	RNA polymerase sigma-54 factor	P49988	RP54_PSEAE	>sp|P49988|RP54_PSEAE RNA polymerase sigma-54 factor OS=Pseudomonas aeruginosa (strain ATCC 15692 / DSM 22644 / CIP 104116 / JCM 14847 / LMG 12228 / 1C / PRS 101 / PAO1) OX=208964 GN=rpoN PE=1 SV=2	56054.2	191300	211908	205954	224627	214037	162167	104718	101356	131303	116525	92514.8	131812	94779	119803	161877	119575	133337	99369.9	130121	78062.1	99421.9	99035.4	119417	131034	148748	146601	117379	114769	126667	124363	145839	110496	111304	146473	328590	48321.7	110486	126342	122160
P50587	P50587	pyrE	Orotate phosphoribosyltransferase	P50587	PYRE_PSEAE	>sp|P50587|PYRE_PSEAE Orotate phosphoribosyltransferase OS=Pseudomonas aeruginosa (strain ATCC 15692 / DSM 22644 / CIP 104116 / JCM 14847 / LMG 12228 / 1C / PRS 101 / PAO1) OX=208964 GN=pyrE PE=3 SV=2	23320.7	130240	144047	150473	138416	148923	169520	212614	237699	195717	271032	201318	211659	223670	224411	254967	316346	168445	264506	192095	87319.6	280320	217482	212572	287066	186456	198914	295794	261833	290279	337032	230841	310258	214267	253676	208193	168673	266873	217298	194056
P50597	P50597	rph	Ribonuclease PH	P50597	RNPH_PSEAE	>sp|P50597|RNPH_PSEAE Ribonuclease PH OS=Pseudomonas aeruginosa (strain ATCC 15692 / DSM 22644 / CIP 104116 / JCM 14847 / LMG 12228 / 1C / PRS 101 / PAO1) OX=208964 GN=rph PE=1 SV=2	25654.2	17678.2	32380.8	33107.8	33831.2	39015.3	31536.6	62258.6	40564.6	60447.8	51582.4	43324.1	63152.2	48230.9	52812.2	40737.3	69895.7	52374	54663.7	30539.7	34771.8	59436.3	39076.2	55881.5	48264.1	35209.1	39526.9	52570.8	32076.3	56171.9	74652.3	50687.7	59443.6	47623.7	73078.7	68282	55137.1	59406.1	41380.9	47172
P50598	P50598	tolQ	Tol-Pal system protein TolQ	P50598	TOLQ_PSEAE	>sp|P50598|TOLQ_PSEAE Tol-Pal system protein TolQ OS=Pseudomonas aeruginosa (strain ATCC 15692 / DSM 22644 / CIP 104116 / JCM 14847 / LMG 12228 / 1C / PRS 101 / PAO1) OX=208964 GN=tolQ PE=3 SV=1	25282	509319	483333	474163	481870	362023	670285	319650	287824	263089	235173	303183	297575	203962	272151	549057	407823	307970	320992	331713	284614	599538	233115	304011	230215	437579	469681	239642	344908	283775	243305	331143	368706	320865	333650	1.28752e+06	345583	288980	337000	446668
P50599	P50599	tolR	Tol-Pal system protein TolR	P50599	TOLR_PSEAE	>sp|P50599|TOLR_PSEAE Tol-Pal system protein TolR OS=Pseudomonas aeruginosa (strain ATCC 15692 / DSM 22644 / CIP 104116 / JCM 14847 / LMG 12228 / 1C / PRS 101 / PAO1) OX=208964 GN=tolR PE=3 SV=1	15788.3	262758	235557	234966	234292	213568	318231	199343	169383	138758	141055	192451	150588	151643	175938	361723	256921	136327	168155	210359	124485	168118	170913	198712	204524	276484	182314	205830	184852	197031	192669	261052	196127	194097	259944	661727	206250	186770	232625	337200
P50600	P50600	tolA	Tol-Pal system protein TolA	P50600	TOLA_PSEAE	>sp|P50600|TOLA_PSEAE Tol-Pal system protein TolA OS=Pseudomonas aeruginosa (strain ATCC 15692 / DSM 22644 / CIP 104116 / JCM 14847 / LMG 12228 / 1C / PRS 101 / PAO1) OX=208964 GN=tolA PE=1 SV=2	37935.3	71686	70934.6	66675.5	63722.7	67529.6	83025.9	66396.2	67935.6	71432.2	61607.7	66916	72730.9	69578.9	83164.4	109182	96013.3	115209	62218.5	88093.1	87688.7	72198.7	8435.98	78195.9	80164.3	107016	79789.4	80723.3	88371.3	69273.7	67006.3	76296.1	77119.6	76201.7	85724	258532	88366.6	68435.4	82582.3	104664
P50601	P50601	tolB	Tol-Pal system protein TolB	P50601	TOLB_PSEAE	>sp|P50601|TOLB_PSEAE Tol-Pal system protein TolB OS=Pseudomonas aeruginosa (strain ATCC 15692 / DSM 22644 / CIP 104116 / JCM 14847 / LMG 12228 / 1C / PRS 101 / PAO1) OX=208964 GN=tolB PE=1 SV=2	47752.1	355011	382064	366293	368239	354016	447002	672365	530609	589036	552299	461158	561907	498177	510003	460629	516810	586453	584188	528399	423873	549740	436510	419181	409630	541159	429874	545218	467006	530022	499719	395919	574913	663840	312734	1.58217e+06	474217	505017	380747	568640
P50987	P50987	argH	Argininosuccinate lyase	P50987	ARLY_PSEAE	>sp|P50987|ARLY_PSEAE Argininosuccinate lyase OS=Pseudomonas aeruginosa (strain ATCC 15692 / DSM 22644 / CIP 104116 / JCM 14847 / LMG 12228 / 1C / PRS 101 / PAO1) OX=208964 GN=argH PE=3 SV=2	51640.7	197855	208956	201488	199507	213333	201827	228052	206521	260571	254172	369571	285348	269671	290989	342430	273916	329636	237496	345413	203922	255514	419065	310283	244003	199416	235090	279216	243979	235211	285983	373768	237372	206304	419579	282409	194209	230215	350614	254762
P51691	P51691	atsA	Arylsulfatase	P51691	ARS_PSEAE	>sp|P51691|ARS_PSEAE Arylsulfatase OS=Pseudomonas aeruginosa (strain ATCC 15692 / DSM 22644 / CIP 104116 / JCM 14847 / LMG 12228 / 1C / PRS 101 / PAO1) OX=208964 GN=atsA PE=1 SV=3	59945.7	6819.94	6290.98	6442.1	5832.41	5764.11	8409.84	3678.36	1985.75	3939.59	4090.52	6109.14	3277.01	6063.18	6007.4	5581.91	4527.75	5536.91	7848.56	6200	1683.37	6283.34	5694.87	6106.65	5997	5337.36	7673.71	6457.48	8920.29	6594.32	17478.8	6081	6286.23	7918.15	6239.38	1153.41	7263.44	3481.72	4492.46	1905.91
P52002	P52002	mexB	Multidrug resistance protein MexB	P52002	MEXB_PSEAE	>sp|P52002|MEXB_PSEAE Multidrug resistance protein MexB OS=Pseudomonas aeruginosa (strain ATCC 15692 / DSM 22644 / CIP 104116 / JCM 14847 / LMG 12228 / 1C / PRS 101 / PAO1) OX=208964 GN=mexB PE=1 SV=2	112791	445603	468471	458833	461581	434115	2475378	2163513	2.40545e+06	3.00481e+06	420956	394945	1.81295e+06	386085	1.77836e+06	2361095	1.64616e+06	559364	2.36798e+06	1.76607e+06	339345	2.16506e+06	407923	379099	1.72508e+06	1.05893e+06	429906	835853	434742	402244	415942	347495	638607	405604	2.37813e+06	662823	13113	366140	442823	539097
P52003	P52003	mexR	Multidrug resistance operon repressor	P52003	MEXR_PSEAE	>sp|P52003|MEXR_PSEAE Multidrug resistance operon repressor OS=Pseudomonas aeruginosa (strain ATCC 15692 / DSM 22644 / CIP 104116 / JCM 14847 / LMG 12228 / 1C / PRS 101 / PAO1) OX=208964 GN=mexR PE=1 SV=1	16964.5	28737.8	23062.3	22270.5	21960.1	23050.5	20216.9	43.771	364.978	559023	26271.7	24220.7	20450.2	30328.7	24041.2	19387.2	24670.8	18054.4	213496	102476	32665.2	17861.4	31669.5	24944	25779.1	164520	18068.3	256715	17391.3	26561.4	25174.2	20573.9	62365.3	26618.6	2449.8	22282.9	22124.9	24198.3	18737.3	33287.4
P52024	P52024	holB	DNA polymerase III subunit delta'	P52024	HOLB_PSEAE	>sp|P52024|HOLB_PSEAE DNA polymerase III subunit delta' OS=Pseudomonas aeruginosa (strain ATCC 15692 / DSM 22644 / CIP 104116 / JCM 14847 / LMG 12228 / 1C / PRS 101 / PAO1) OX=208964 GN=holB PE=3 SV=2	35746.4	46514.8	41860.3	39264.2	48072	45040.9	40428.6	22053.9	28306.9	35697.4	29470.6	22932.2	32585.6	28760.6	36030.1	41631.4	27141.5	34258.2	23158.9	27495.1	16329.2	18415	24192.9	36311.6	37965.1	35163.4	32933.7	47061.8	29268.1	38931.5	36149.6	43316.6	28651.3	33552.2	36997.2	84001.6	44427.9	29293.7	51496.9	26975.7
P52111	P52111	glpD	Glycerol-3-phosphate dehydrogenase	P52111	GLPD_PSEAE	>sp|P52111|GLPD_PSEAE Glycerol-3-phosphate dehydrogenase OS=Pseudomonas aeruginosa (strain ATCC 15692 / DSM 22644 / CIP 104116 / JCM 14847 / LMG 12228 / 1C / PRS 101 / PAO1) OX=208964 GN=glpD PE=3 SV=2	57135	52290.4	69625.6	62837.7	68714.4	66844.2	133764	85285	56492.3	86219.4	92964.8	68840.4	60501.3	63752.8	107580	320011	107599	51638.2	53275.6	76095.3	32995	60861.2	32890.4	26800	16054	94608.3	70487.5	69344.2	97134.2	34080.5	49630.9	51959.3	60941.8	20432.4	94708.9	192133	220659	38862.2	63613	50935.9
P52477	P52477	mexA	Multidrug resistance protein MexA	P52477	MEXA_PSEAE	>sp|P52477|MEXA_PSEAE Multidrug resistance protein MexA OS=Pseudomonas aeruginosa (strain ATCC 15692 / DSM 22644 / CIP 104116 / JCM 14847 / LMG 12228 / 1C / PRS 101 / PAO1) OX=208964 GN=mexA PE=1 SV=1	40969.6	777374	744101	737812	755835	712159	4947256	3945989	5456133	6.08056e+06	818533	705866	4239340	785192	3681638	5.19931e+06	4304100	900699	4817691	1.92872e+06	703479	3.34005e+06	809229	711142	4.96428e+06	2.77762e+06	938339	2397872	891522	955002	784599	708679	1326779	918327	4959048	67730.5	1.03032e+06	732916	841258	1.16011e+06
P53593	P53593	sucC	Succinate--CoA ligase [ADP-forming] subunit beta	P53593	SUCC_PSEAE	>sp|P53593|SUCC_PSEAE Succinate--CoA ligase [ADP-forming] subunit beta OS=Pseudomonas aeruginosa (strain ATCC 15692 / DSM 22644 / CIP 104116 / JCM 14847 / LMG 12228 / 1C / PRS 101 / PAO1) OX=208964 GN=sucC PE=1 SV=2	41542.7	2.85329e+06	2904819	2.89482e+06	2.92351e+06	2.72114e+06	3023322	3.10435e+06	2.90788e+06	3255213	2.67527e+06	3.3191e+06	3.52012e+06	3.04171e+06	3.38239e+06	4.37482e+06	4483549	4.42808e+06	5302692	3.89282e+06	2867188	4439708	4500063	3.61526e+06	3.0872e+06	3.64067e+06	3474754	4.10026e+06	3.79292e+06	3.89071e+06	3434942	4.00092e+06	3.32627e+06	3545451	4749251	6.57887e+06	4.13638e+06	3558406	3.54261e+06	4.09577e+06
P53641	P53641	sodB	Superoxide dismutase [Fe]	P53641	SODF_PSEAE	>sp|P53641|SODF_PSEAE Superoxide dismutase [Fe] OS=Pseudomonas aeruginosa (strain ATCC 15692 / DSM 22644 / CIP 104116 / JCM 14847 / LMG 12228 / 1C / PRS 101 / PAO1) OX=208964 GN=sodB PE=1 SV=3	21350.8	2.79674e+06	3.2302e+06	3.17559e+06	3.24336e+06	3.08193e+06	2.09606e+06	5.49831e+06	6.28569e+06	4929321	5.29928e+06	2.21131e+06	2939708	4.22565e+06	3.44169e+06	1.21293e+06	2.23604e+06	4.80937e+06	6.29841e+06	1.83701e+06	5111889	5.6518e+06	4627236	4.42396e+06	3188410	3304699	3.43226e+06	4.74786e+06	2669125	5.85107e+06	4.99271e+06	2.48089e+06	6.25106e+06	4443907	1.68263e+06	2.13144e+06	2890049	5.53286e+06	2.57212e+06	3.78095e+06
P53652	P53652	sodA	Superoxide dismutase [Mn]	P53652	SODM_PSEAE	>sp|P53652|SODM_PSEAE Superoxide dismutase [Mn] OS=Pseudomonas aeruginosa (strain ATCC 15692 / DSM 22644 / CIP 104116 / JCM 14847 / LMG 12228 / 1C / PRS 101 / PAO1) OX=208964 GN=sodA PE=1 SV=2	22506.2	111598	89216.3	92514.5	74940.5	96933.1	100924	90111.6	125701	87109	50998.2	97916.8	84787.9	99063.2	94922	127293	85756	44849.2	102681	130041	93410.1	9059.51	106112	128922	112002	89591	89275.7	102396	58197	93646.3	111561	113348	73948.8	95046.8	155916	58800.5	57542.8	54185.4	162555	147191
P54291	P54291	rhlI	Acyl-homoserine-lactone synthase	P54291	RHLI_PSEAE	>sp|P54291|RHLI_PSEAE Acyl-homoserine-lactone synthase OS=Pseudomonas aeruginosa (strain ATCC 15692 / DSM 22644 / CIP 104116 / JCM 14847 / LMG 12228 / 1C / PRS 101 / PAO1) OX=208964 GN=rhlI PE=3 SV=2	22630.1	4317.15	5018.9	4640.69	6963.51	5423.45	23438.1	13726.3	23466.3	29892.8	12009.4	4166.01	13373	7113.55	15351	7370.82	16330.3	10058.1	24523	3238.17	8059.97	5989.41	4977.23	18122.6	22502.4	6891.17	16369.7	17138.8	27390.4	27072.5	28374.4	24838.4	22426.7	16073.8	1972.19	1457.69	22887.6	25902	9963.83	11246
P54292	P54292	rhlR	HTH-type quorum-sensing regulator RhlR	P54292	RHLR_PSEAE	>sp|P54292|RHLR_PSEAE HTH-type quorum-sensing regulator RhlR OS=Pseudomonas aeruginosa (strain ATCC 15692 / DSM 22644 / CIP 104116 / JCM 14847 / LMG 12228 / 1C / PRS 101 / PAO1) OX=208964 GN=rhlR PE=1 SV=1	27577.6	30592.5	28748.1	21426.7	29954.3	30691.9	34480.4	148096	180380	214917	122935	6974.5	94414.2	99498.6	84762.7	6837.07	22171.9	79304.2	4082.75	10817.1	75613.1	5806	10944.5	96888.1	78834.2	32424.5	45363.8	163744	126641	247969	207127	35723.5	184213	158978	5244.47	13909.8	107594	185193	55524.4	159579
P55218	P55218	metZ	O-succinylhomoserine sulfhydrylase	P55218	METZ_PSEAE	>sp|P55218|METZ_PSEAE O-succinylhomoserine sulfhydrylase OS=Pseudomonas aeruginosa (strain ATCC 15692 / DSM 22644 / CIP 104116 / JCM 14847 / LMG 12228 / 1C / PRS 101 / PAO1) OX=208964 GN=metZ PE=1 SV=1	43185	316264	331966	311124	318256	376037	348342	474926	502716	515067	519990	446158	818133	470378	673800	410650	633578	545386	500888	306701	314699	469474	414915	440559	416545	312224	360239	515976	340588	422513	464539	468565	455583	479795	476886	316501	443921	496310	452080	447999
P55222	P55222	vfr	cAMP-activated global transcriptional regulator Vfr	P55222	VFR_PSEAE	>sp|P55222|VFR_PSEAE cAMP-activated global transcriptional regulator Vfr OS=Pseudomonas aeruginosa (strain ATCC 15692 / DSM 22644 / CIP 104116 / JCM 14847 / LMG 12228 / 1C / PRS 101 / PAO1) OX=208964 GN=vfr PE=1 SV=1	24225	551580	652022	590640	630645	684376	643929	306368	445698	424558	302201	296336	438068	294700	376811	694376	498027	7335.34	340740	345029	159618	524522	637723	420715	552343	515751	484839	518759	496013	486611	581286	567562	438951	384134	515663	138170	379298	433290	507079	351286
P57109	P57109	maiA	Maleylacetoacetate isomerase	P57109	MAAI_PSEAE	>sp|P57109|MAAI_PSEAE Maleylacetoacetate isomerase OS=Pseudomonas aeruginosa (strain ATCC 15692 / DSM 22644 / CIP 104116 / JCM 14847 / LMG 12228 / 1C / PRS 101 / PAO1) OX=208964 GN=maiA PE=3 SV=1	23684.9	76855.4	223791	197566	193809	174384	178640	243449	251746	178527	130962	20069.5	164954	67933.3	93522.5	102286	136163	108943	190631	23014.3	5247.58	169418	75521.9	241372	146771	182496	281270	164591	118623	351252	231708	223314	206216	291700	93370.1	153993	136090	272996	62017.4	146853
P57112	P57112	sthA	Soluble pyridine nucleotide transhydrogenase	P57112	STHA_PSEAE	>sp|P57112|STHA_PSEAE Soluble pyridine nucleotide transhydrogenase OS=Pseudomonas aeruginosa (strain ATCC 15692 / DSM 22644 / CIP 104116 / JCM 14847 / LMG 12228 / 1C / PRS 101 / PAO1) OX=208964 GN=sthA PE=1 SV=2	51161	1.09384e+06	1.09893e+06	1.09114e+06	1.08465e+06	1.10826e+06	984908	743525	766966	870311	749136	993817	832665	841159	801299	904808	820590	2.31282e+06	890505	1.05058e+06	570938	901114	668413	753710	835140	1.08654e+06	955764	892733	734785	667067	658635	877261	728119	731691	951903	954909	1.27903e+06	622909	943430	753483
P57665	P57665	orn	Oligoribonuclease	P57665	ORN_PSEAE	>sp|P57665|ORN_PSEAE Oligoribonuclease OS=Pseudomonas aeruginosa (strain ATCC 15692 / DSM 22644 / CIP 104116 / JCM 14847 / LMG 12228 / 1C / PRS 101 / PAO1) OX=208964 GN=orn PE=1 SV=1	20826.6	18078.1	17312.2	19061.2	16048.6	19914.2	16907.6	35396.9	48913.4	40396.2	44922.1	31717.9	34028.9	48068.4	41478	22464.4	24496.5	36794.8	34818.8	20378	39552.1	34173.6	35230.8	22389.4	32157.6	22258.1	21803.1	41436.7	22866.9	61566.3	49012.6	22845.1	50053.5	30874.5	18041.7	37342.8	21740.4	42421.5	20817.2	35924.3
P57668	P57668	tpx	Thiol peroxidase	P57668	TPX_PSEAE	>sp|P57668|TPX_PSEAE Thiol peroxidase OS=Pseudomonas aeruginosa (strain ATCC 15692 / DSM 22644 / CIP 104116 / JCM 14847 / LMG 12228 / 1C / PRS 101 / PAO1) OX=208964 GN=tpx PE=3 SV=1	17233.8	611948	834266	659112	804735	895112	733924	854898	1.78616e+06	1.53311e+06	1.85026e+06	359589	1.71085e+06	1.20005e+06	1.18744e+06	513773	751199	1.22086e+06	809599	637822	90293.1	708887	745023	483527	1059694	561268	672658	1.00398e+06	365563	1.88298e+06	1.35455e+06	758966	946115	1.00482e+06	268988	1.79827e+06	778587	1.68597e+06	555109	1.03013e+06
P57698	P57698	kdpB	Potassium-transporting ATPase ATP-binding subunit	P57698	KDPB_PSEAE	>sp|P57698|KDPB_PSEAE Potassium-transporting ATPase ATP-binding subunit OS=Pseudomonas aeruginosa (strain ATCC 15692 / DSM 22644 / CIP 104116 / JCM 14847 / LMG 12228 / 1C / PRS 101 / PAO1) OX=208964 GN=kdpB PE=3 SV=1	72990	5049.97	9337.33	5649.06	5290.46	4732.34	3127.18	9054.33	8474.71	3758.55	7565.92	2052.46	3545.3	7369.31	11429.9	1977.62	4672.04	10471.8	35160.7	4878.04	5353.5	5374.19	9135.43	4535.87	6021.23	7231.8	9963.18	4001.02	4193.02	1977.72	11691.1	6839.5	8877.71	3143.62	9748.79	16741.3	11217.3	8851.42	15655	4236.25
P57701	P57701	dsbB2	Disulfide bond formation protein B 2	P57701	DSBB2_PSEAE	>sp|P57701|DSBB2_PSEAE Disulfide bond formation protein B 2 OS=Pseudomonas aeruginosa (strain ATCC 15692 / DSM 22644 / CIP 104116 / JCM 14847 / LMG 12228 / 1C / PRS 101 / PAO1) OX=208964 GN=dsbB2 PE=3 SV=1	18131.9	82260.7	88926.7	41157.2	44145.1	81000.3	82829	31053.9	19201.5	25464.8	42612	52205.1	21483.7	34429.7	40791.5	63102.3	46412.8	49006.3	59244.6	58276.9	20127.7	47630.6	52835.9	37130.6	32198	33934.7	52082.6	48998.4	23564	22687.1	6961.8	31584.5	18628.4	31737.5	40899.5	44767	17956.5	12983.1	31424.9	49964.3
P57703	P57703	metE	5-methyltetrahydropteroyltriglutamate--homocysteine methyltransferase	P57703	METE_PSEAE	>sp|P57703|METE_PSEAE 5-methyltetrahydropteroyltriglutamate--homocysteine methyltransferase OS=Pseudomonas aeruginosa (strain ATCC 15692 / DSM 22644 / CIP 104116 / JCM 14847 / LMG 12228 / 1C / PRS 101 / PAO1) OX=208964 GN=metE PE=3 SV=1	86211.3	10985.1	10321.9	10264.3	11331.2	10618.2	489576	537984	162952	94029.7	15826	6663.48	7661.52	11280.4	15880.6	25106.7	4663.68	214092	143221	6974.24	42857.6	4547.23	6644.99	730770	6203216	7760.52	94502	187926	17610.6	13883.4	17108.2	84993.7	8896.09	69607.6	3997.57	8539.63	12386.6	9628.56	99330	64272.2
P57707	P57707	ispD	2-C-methyl-D-erythritol 4-phosphate cytidylyltransferase	P57707	ISPD_PSEAE	>sp|P57707|ISPD_PSEAE 2-C-methyl-D-erythritol 4-phosphate cytidylyltransferase OS=Pseudomonas aeruginosa (strain ATCC 15692 / DSM 22644 / CIP 104116 / JCM 14847 / LMG 12228 / 1C / PRS 101 / PAO1) OX=208964 GN=ispD PE=3 SV=1	25613.2	21390.1	21051.7	19170.7	18830.2	21558.1	21031.5	14206.3	17449.4	16419.9	17105	16715.5	15338	22499.1	14825.3	24117.6	15121.9	16103	6054.42	10611.5	3533.15	4254.2	10597.7	12911.3	18876.2	11967.9	14640.9	16794.4	8393.15	26245	22637.2	15733.8	15083.6	9853	13415.2	23717.2	18695.9	13786.8	15449.7	11316.5
P57708	P57708	ispF	2-C-methyl-D-erythritol 2,4-cyclodiphosphate synthase	P57708	ISPF_PSEAE	>sp|P57708|ISPF_PSEAE 2-C-methyl-D-erythritol 2,4-cyclodiphosphate synthase OS=Pseudomonas aeruginosa (strain ATCC 15692 / DSM 22644 / CIP 104116 / JCM 14847 / LMG 12228 / 1C / PRS 101 / PAO1) OX=208964 GN=ispF PE=1 SV=1	16662.2	103235	107630	94631.3	120181	142524	126339	91294.9	214032	176848	204144	91492.9	149876	142202	132678	172406	198523	150233	154748	35790.5	49969.9	165821	152901	115369	162054	114821	147661	187518	152142	228035	214305	162951	164166	99823.5	135078	157591	48910.4	121209	101480	142289
P57714	P57714	metXS	Homoserine O-succinyltransferase	P57714	METXS_PSEAE	>sp|P57714|METXS_PSEAE Homoserine O-succinyltransferase OS=Pseudomonas aeruginosa (strain ATCC 15692 / DSM 22644 / CIP 104116 / JCM 14847 / LMG 12228 / 1C / PRS 101 / PAO1) OX=208964 GN=metXS PE=1 SV=1	41834.4	556964	639418	606246	641376	661184	516408	374899	384371	425291	417501	283571	393524	307681	437340	505808	548841	377968	329906	338984	78626.5	295112	313595	350815	569933	595597	476392	461556	359126	440963	410144	457550	374974	365842	478322	647483	547002	414546	340598	405962
P65116	P65116	infA	Translation initiation factor IF-1	P65116	IF1_PSEAE	>sp|P65116|IF1_PSEAE Translation initiation factor IF-1 OS=Pseudomonas aeruginosa (strain ATCC 15692 / DSM 22644 / CIP 104116 / JCM 14847 / LMG 12228 / 1C / PRS 101 / PAO1) OX=208964 GN=infA PE=1 SV=1	8302.55	151103	186332	161181	190720	226723	246803	206397	178157	207659	253868	121481	242883	193350	246075	400952	253603	168288	192780	135820	40460.2	161689	190442	185860	166193	210542	182578	288846	262651	257902	299485	283548	278545	170079	366642	412482	267921	246138	203987	218938
P72151	P72151	fliC	B-type flagellin	P72151	FLICB_PSEAE	>sp|P72151|FLICB_PSEAE B-type flagellin OS=Pseudomonas aeruginosa (strain ATCC 15692 / DSM 22644 / CIP 104116 / JCM 14847 / LMG 12228 / 1C / PRS 101 / PAO1) OX=208964 GN=fliC PE=1 SV=2	49242.2	2777929	2300751	2373946	2.563e+06	2.67632e+06	5.23334e+06	2078402	2.59384e+06	2.80733e+06	2228023	1.13137e+06	1.96309e+06	1.8324e+06	1953341	4.36358e+06	1.13336e+06	1.48719e+06	1.7211e+06	1279296	900933	2412710	2.45288e+06	1.95532e+06	1398574	1.84746e+06	4.31008e+06	2.04005e+06	2.59107e+06	2.37821e+06	1.94394e+06	3.11164e+06	1.96246e+06	2.09761e+06	1.8629e+06	23352.1	305097	2.76603e+06	1.78389e+06	805509
P72154	P72154	truB	tRNA pseudouridine synthase B	P72154	TRUB_PSEAE	>sp|P72154|TRUB_PSEAE tRNA pseudouridine synthase B OS=Pseudomonas aeruginosa (strain ATCC 15692 / DSM 22644 / CIP 104116 / JCM 14847 / LMG 12228 / 1C / PRS 101 / PAO1) OX=208964 GN=truB PE=3 SV=2	33410.3	587583	693224	620030	661577	729290	561424	455808	372930	443766	368693	325676	437609	378548	495514	654193	827689	338944	310176	447727	201324	265708	344487	400590	470312	471836	492107	573080	394325	512348	537764	587160	371891	383254	708285	753862	917782	403485	535813	458965
P72157	P72157	purE	N5-carboxyaminoimidazole ribonucleotide mutase	P72157	PURE_PSEAE	>sp|P72157|PURE_PSEAE N5-carboxyaminoimidazole ribonucleotide mutase OS=Pseudomonas aeruginosa (strain ATCC 15692 / DSM 22644 / CIP 104116 / JCM 14847 / LMG 12228 / 1C / PRS 101 / PAO1) OX=208964 GN=purE PE=3 SV=2	16889.5	60440.6	59253.5	53399.7	58681.9	57098.4	52356.1	89061.3	98914.1	118424	99353.6	78407.5	86323.4	106520	95638.5	67926.4	81432	64278.1	87615.9	78186.8	97072.5	83477.1	96995	95017.4	81051.4	77110.9	78360.9	88446.4	77239	105217	88831.3	81981.7	91914.6	89378.3	51712.2	107282	109927	101379	70914.2	66116.9
P72158	P72158	purK	N5-carboxyaminoimidazole ribonucleotide synthase	P72158	PURK_PSEAE	>sp|P72158|PURK_PSEAE N5-carboxyaminoimidazole ribonucleotide synthase OS=Pseudomonas aeruginosa (strain ATCC 15692 / DSM 22644 / CIP 104116 / JCM 14847 / LMG 12228 / 1C / PRS 101 / PAO1) OX=208964 GN=purK PE=3 SV=2	38495.8	119870	136316	116015	127395	132452	129773	194473	200612	222086	225397	163731	171379	209003	204943	155425	195871	102497	225519	207019	201876	196030	189670	221794	183432	146990	166420	214061	196340	244791	191043	204527	213420	222397	169286	220847	254378	213884	156518	161332
P72161	P72161	pbpG	D-alanyl-D-alanine endopeptidase	P72161	PBP5_PSEAE	>sp|P72161|PBP5_PSEAE D-alanyl-D-alanine endopeptidase OS=Pseudomonas aeruginosa (strain ATCC 15692 / DSM 22644 / CIP 104116 / JCM 14847 / LMG 12228 / 1C / PRS 101 / PAO1) OX=208964 GN=pbpG PE=3 SV=2	34046.4	1131.76	4198.2	3486.47	3358.66	2489.24	832.248	21079.7	3996.8	29915.5	11721.7	7029.67	11119.1	10184.8	15324.7	7008.61	29406.9	9924.81	7652.08	6610.2	9085.44	9877.1	13831.4	21195.6	23989.9	4545.73	10709.2	32198.3	36357.7	27040.6	28041.7	10987.3	17969.1	21916.4	23092	127947	32326.2	16906.5	8980.98	24281.8
P72170	P72170	pyrC	Dihydroorotase	P72170	PYRC_PSEAE	>sp|P72170|PYRC_PSEAE Dihydroorotase OS=Pseudomonas aeruginosa (strain ATCC 15692 / DSM 22644 / CIP 104116 / JCM 14847 / LMG 12228 / 1C / PRS 101 / PAO1) OX=208964 GN=pyrC PE=3 SV=2	38406.7	69968.5	95904.3	80902.6	87229.4	98723.3	109723	134484	143828	117238	102792	68855.6	95022.2	90627.6	92542.6	94970.4	167891	62177	144316	89011.5	25970.8	126304	92757.8	114979	139977	113267	128065	135244	67786.5	122916	109779	141447	136187	138019	138500	166819	119439	95371.7	91133.9	81352.1
P72171	P72171	oruR	Ornithine utilization regulator	P72171	ORUR_PSEAE	>sp|P72171|ORUR_PSEAE Ornithine utilization regulator OS=Pseudomonas aeruginosa (strain ATCC 15692 / DSM 22644 / CIP 104116 / JCM 14847 / LMG 12228 / 1C / PRS 101 / PAO1) OX=208964 GN=oruR PE=4 SV=1	37610.2	39304.9	194568	10455.4	21314.5	8682.52	118372	130139	108838	43499.7	49457	41377.3	37643.1	47381	26748.4	33479	321449	60206.9	186343	20789.9	44802.9	74622.1	169175	67685.7	99552.2	20704.8	39219	100138	175573	32131.9	237101	18937.1	13892.8	53893.1	21906.9	86193.5	33225	55743.8	16810.9	269400
P72173	P72173	aspC	Aspartate aminotransferase	P72173	AAT_PSEAE	>sp|P72173|AAT_PSEAE Aspartate aminotransferase OS=Pseudomonas aeruginosa (strain ATCC 15692 / DSM 22644 / CIP 104116 / JCM 14847 / LMG 12228 / 1C / PRS 101 / PAO1) OX=208964 GN=aspC PE=3 SV=2	43319.3	835868	1.04784e+06	964289	1.00422e+06	1.02912e+06	761398	1.11488e+06	1.35657e+06	1.26077e+06	1.04391e+06	1.06315e+06	1063151	972571	1061149	927134	1067648	1.29883e+06	1.09374e+06	881682	695251	1.24158e+06	1.04862e+06	1.09143e+06	821818	1.01781e+06	1178460	1.25043e+06	873672	1.47738e+06	1.50831e+06	1.08445e+06	1455322	1.321e+06	1125661	930659	1.01487e+06	1.35169e+06	848432	1.14119e+06
P72174	P72174	uvrB	UvrABC system protein B	P72174	UVRB_PSEAE	>sp|P72174|UVRB_PSEAE UvrABC system protein B OS=Pseudomonas aeruginosa (strain ATCC 15692 / DSM 22644 / CIP 104116 / JCM 14847 / LMG 12228 / 1C / PRS 101 / PAO1) OX=208964 GN=uvrB PE=3 SV=2	76067.3	174820	155348	154746	158123	160191	141310	94051.5	118976	116922	131616	136965	120922	126818	110461	111946	101056	132714	116467	128126	105204	126352	120521	125150	134132	121422	124872	110918	78048.3	108412	108111	112501	121258	113862	87131.9	127550	94930.2	114861	127042	105999
P77915	P77915	hemN	Oxygen-independent coproporphyrinogen III oxidase	P77915	HEMN_PSEAE	>sp|P77915|HEMN_PSEAE Oxygen-independent coproporphyrinogen III oxidase OS=Pseudomonas aeruginosa (strain ATCC 15692 / DSM 22644 / CIP 104116 / JCM 14847 / LMG 12228 / 1C / PRS 101 / PAO1) OX=208964 GN=hemN PE=2 SV=2	52488.3	440048	436844	433859	450004	447951	368989	199133	186166	197914	172447	152012	178734	124969	172003	234863	186223	105447	99269.6	169711	159909	125409	249221	242532	139390	257012	256626	196205	181883	207055	216284	225834	205526	211630	197919	23756.7	53690.3	180318	213134	177566
P80357	P80357	astA	Arginine N-succinyltransferase subunit alpha	P80357	ASTA_PSEAE	>sp|P80357|ASTA_PSEAE Arginine N-succinyltransferase subunit alpha OS=Pseudomonas aeruginosa (strain ATCC 15692 / DSM 22644 / CIP 104116 / JCM 14847 / LMG 12228 / 1C / PRS 101 / PAO1) OX=208964 GN=astA PE=1 SV=2	36930.7	71803.8	58397.5	65087.6	70633.3	68843.7	75486.8	82090.4	55702.7	51664.8	56751.8	51243.5	58083.2	64002.9	51932.9	49891	63310.1	79359.9	43241.8	39393.5	10897.5	36802.7	52869.5	68890.2	66627.1	43351	59404	87094.4	71634.9	66976.8	44752.2	80639.2	34477.6	80403.1	81382.9	66066.1	119541	57427	72990	64856.1
P80358	P80358	aruG	Arginine N-succinyltransferase subunit beta	P80358	ASTG_PSEAE	>sp|P80358|ASTG_PSEAE Arginine N-succinyltransferase subunit beta OS=Pseudomonas aeruginosa (strain ATCC 15692 / DSM 22644 / CIP 104116 / JCM 14847 / LMG 12228 / 1C / PRS 101 / PAO1) OX=208964 GN=aruG PE=1 SV=2	37245.5	226957	217970	194681	210836	224610	225226	235160	186441	184810	178430	147099	177923	170652	183568	145226	202233	235629	131663	103086	106279	117699	155312	222805	179329	156693	192936	230427	209282	214424	139517	218280	138610	253831	257162	226037	307980	165124	211352	190661
P95412	P95412	nirD	Siroheme decarboxylase NirD subunit	P95412	NIRD_PSEAE	>sp|P95412|NIRD_PSEAE Siroheme decarboxylase NirD subunit OS=Pseudomonas aeruginosa (strain ATCC 15692 / DSM 22644 / CIP 104116 / JCM 14847 / LMG 12228 / 1C / PRS 101 / PAO1) OX=208964 GN=nirD PE=3 SV=1	17017.4	46378.9	41177.2	37909	43521.8	41346.8	31485.2	2410.38	2110.36	4253.64	6078.71	7787.73	6202.24	3267.27	5939.53	29834.1	13397.2	3069.23	3595.45	8509.94	4348.37	2653.48	21130.7	13573.5	2965.57	18257.8	19184.7	7962.42	17484.1	4812.46	6683.73	18249.7	6766.76	2410.41	33909.7	2798.13	1611.45	2711.14	22685.8	5323.02
P95413	P95413	nirL	Siroheme decarboxylase NirL subunit	P95413	NIRL_PSEAE	>sp|P95413|NIRL_PSEAE Siroheme decarboxylase NirL subunit OS=Pseudomonas aeruginosa (strain ATCC 15692 / DSM 22644 / CIP 104116 / JCM 14847 / LMG 12228 / 1C / PRS 101 / PAO1) OX=208964 GN=nirL PE=3 SV=1	20210.2	60232.5	68249.4	64425.4	66599.6	60562.3	49454.2	11425.7	8532.55	14393.1	12345.9	18470.8	17346.2	11385.4	22387.6	43282	41574	2212.78	5766.32	21186.1	8371.09	5179.47	19720.2	32728.2	4524.12	43546.4	40336.6	19635.5	33423.1	11042.7	16681.3	31998.3	18855.9	4536.96	47519.1	6042.15	4691.19	8199.93	38280.2	13600.9
P95414	P95414	nirG	Siroheme decarboxylase NirG subunit	P95414	NIRG_PSEAE	>sp|P95414|NIRG_PSEAE Siroheme decarboxylase NirG subunit OS=Pseudomonas aeruginosa (strain ATCC 15692 / DSM 22644 / CIP 104116 / JCM 14847 / LMG 12228 / 1C / PRS 101 / PAO1) OX=208964 GN=nirG PE=3 SV=1	16551.9	22217.7	19971.8	17447.7	17809.3	18339	23472.4	5308.65	6944.02	3102.35	9185.04	7804.51	7660.29	6272.79	13316.8	23016.1	16940.7	1255.2	6507.61	8883.45	8634.23	2456.5	14350.7	10241.7	6220.69	19710.2	18971.2	9898.95	8.06764	8248.89	8589.08	9571.2	15208.1	6145.33	20702.6	2403.99	1558.35	4638.85	18324.9	6645.47
P95415	P95415	nirH	Siroheme decarboxylase NirH subunit	P95415	NIRH_PSEAE	>sp|P95415|NIRH_PSEAE Siroheme decarboxylase NirH subunit OS=Pseudomonas aeruginosa (strain ATCC 15692 / DSM 22644 / CIP 104116 / JCM 14847 / LMG 12228 / 1C / PRS 101 / PAO1) OX=208964 GN=nirH PE=3 SV=1	19581.8	40879.9	33866.7	31672.8	31402.5	27464	31443.8	5305.9	7897.93	11123.1	11336	12820.7	19063.4	11826.3	25542.2	34017.7	25874.4	4100.25	933.764	16586.9	1743.13	2745.41	17534.6	2031.28	1809.05	26933.2	18212.7	15272.4	17485.9	13912.9	15844	10853.3	13884.2	4480.8	22523.5	4836.07	13.7796	4197.77	14552.7	8897.78
P95435	P95435	pscG	Type 3 secretion system chaperone PscG	P95435	PSCG_PSEAE	>sp|P95435|PSCG_PSEAE Type 3 secretion system chaperone PscG OS=Pseudomonas aeruginosa (strain ATCC 15692 / DSM 22644 / CIP 104116 / JCM 14847 / LMG 12228 / 1C / PRS 101 / PAO1) OX=208964 GN=pscG PE=1 SV=1	12451.1	4657.13	3799.67	3457.58	6469.5	7048.49	10598.2	25675.8	2016.82	7228.48	11111	6503.58	70199.8	13142.8	44160	18533.2	172746	4061.9	2293.25	3259.14	5650.73	6923.55	7423.7	5228.73	37962.2	4130.92	6377.85	10176.7	28273.8	8283.28	2597.49	4827.51	4114.67	9010.82	5212.17	9822.02	784.191	9928.66	79270.4	7589.68
P95453	P95453	PA4753	Probable RNA-binding protein PA4753	P95453	Y4753_PSEAE	>sp|P95453|Y4753_PSEAE Probable RNA-binding protein PA4753 OS=Pseudomonas aeruginosa (strain ATCC 15692 / DSM 22644 / CIP 104116 / JCM 14847 / LMG 12228 / 1C / PRS 101 / PAO1) OX=208964 GN=PA4753 PE=4 SV=1	11657.6	173664	180419	163904	160243	161596	148866	157005	138136	139825	153962	179862	167158	183750	242477	341700	401939	131633	205747	213022	166526	159282	224419	189241	219312	235665	200168	211852	269276	171387	183444	254264	184070	161740	385452	478224	269935	167899	229697	207305
P95454	P95454	rlmE	Ribosomal RNA large subunit methyltransferase E	P95454	RLME_PSEAE	>sp|P95454|RLME_PSEAE Ribosomal RNA large subunit methyltransferase E OS=Pseudomonas aeruginosa (strain ATCC 15692 / DSM 22644 / CIP 104116 / JCM 14847 / LMG 12228 / 1C / PRS 101 / PAO1) OX=208964 GN=rlmE PE=3 SV=2	23498.8	80032.4	67969.9	68897.9	71925.1	68563.9	63457	54975.4	66790.6	67058.7	54186.5	31718.9	63991.6	44858.8	55618.4	43710.7	49774.8	58811.1	49554	34328.8	41694.2	50859.5	55092.4	47899	51231.2	59656.4	55921.2	63670.4	52380.8	74000.7	68639.4	48694.4	54295	62396.2	41020.1	72938.9	78547.4	74798.4	47245.2	54126.7
P95458	P95458	hemE	Uroporphyrinogen decarboxylase	P95458	DCUP_PSEAE	>sp|P95458|DCUP_PSEAE Uroporphyrinogen decarboxylase OS=Pseudomonas aeruginosa (strain ATCC 15692 / DSM 22644 / CIP 104116 / JCM 14847 / LMG 12228 / 1C / PRS 101 / PAO1) OX=208964 GN=hemE PE=1 SV=2	38792.4	38373.6	36668	30226.9	33609.2	27481	39014.9	54957.2	58961.5	58101.1	52807.3	42497	57577.4	57594.5	61289.9	52322.3	66392.9	41231.8	58708.2	59705.1	60748.2	58962.6	41460.4	48775	57230.9	62866.7	61939.6	64702.4	58134.9	66372.4	64237.3	50355.5	69651.9	53764.7	47763.3	64499.9	34489.3	62823	59578.6	50502.3
P95459	P95459	cspA	Major cold shock protein CspA	P95459	CSPA_PSEAE	>sp|P95459|CSPA_PSEAE Major cold shock protein CspA OS=Pseudomonas aeruginosa (strain ATCC 15692 / DSM 22644 / CIP 104116 / JCM 14847 / LMG 12228 / 1C / PRS 101 / PAO1) OX=208964 GN=cspA PE=2 SV=1	7605.52	176507	102532	117904	118081	89433	109124	62770.6	46176.9	103576	128770	137271	146323	336807	532833	373225	324311	318239	235955	634809	120329	88981	86023.1	182561	214495	273264	151727	269937	286161	170726	207445	209590	85850.8	106279	287691	894762	499505	190111	265853	234622
P96956	P96956	algK	Alginate biosynthesis protein AlgK	P96956	ALGK_PSEAE	>sp|P96956|ALGK_PSEAE Alginate biosynthesis protein AlgK OS=Pseudomonas aeruginosa (strain ATCC 15692 / DSM 22644 / CIP 104116 / JCM 14847 / LMG 12228 / 1C / PRS 101 / PAO1) OX=208964 GN=algK PE=1 SV=1	52475.4	48107.8	8972.01	5312.67	12424.5	46851.9	31817.7	42717.2	31956.5	43756.3	47123.8	2791.56	31326.9	19970	1907.77	8250.25	3377.2	4026.82	16141.2	28640.4	16296.4	32855	3002.96	19372.5	36991.3	5947.11	46042.7	7483.46	6612.55	51489.4	4890.8	30799.9	18082.1	42476	66063	1.75177e+06	8332.2	20779.4	4724.65	40094.8
P96963	P96963	radA	DNA repair protein RadA	P96963	RADA_PSEAE	>sp|P96963|RADA_PSEAE DNA repair protein RadA OS=Pseudomonas aeruginosa (strain ATCC 15692 / DSM 22644 / CIP 104116 / JCM 14847 / LMG 12228 / 1C / PRS 101 / PAO1) OX=208964 GN=radA PE=3 SV=2	48410.8	131752	135929	135496	141898	145211	113197	112693	102440	113670	99216	94613.6	119343	102148	117883	118898	104563	134396	113413	100048	91238.4	85760.5	106914	105741	116796	128600	108163	89075.8	79906.9	102343	110024	105879	95647.5	106783	78252.5	143112	100681	111113	103562	119474
Q00512	Q00512	xcpR	Type II secretion system protein E	Q00512	GSPE_PSEAE	>sp|Q00512|GSPE_PSEAE Type II secretion system protein E OS=Pseudomonas aeruginosa (strain ATCC 15692 / DSM 22644 / CIP 104116 / JCM 14847 / LMG 12228 / 1C / PRS 101 / PAO1) OX=208964 GN=xcpR PE=1 SV=1	55524.7	26258.8	26937.2	24965.4	27847.9	30654.8	29812.6	74056.4	64298.6	68351.8	63500.4	53181.8	63262.5	48019.5	63016.8	40276	31772.8	23299.7	34843.1	24000.6	56635.4	55851.4	57321.3	41568.4	51480.3	32074.7	31672	76398.6	71648.5	76034.6	84580.1	30826.3	70425.9	86119.9	23309.4	20158.6	58349.2	66153.2	35484.2	59822.3
Q00513	Q00513	xcpS	Type II secretion system protein F	Q00513	GSPF_PSEAE	>sp|Q00513|GSPF_PSEAE Type II secretion system protein F OS=Pseudomonas aeruginosa (strain ATCC 15692 / DSM 22644 / CIP 104116 / JCM 14847 / LMG 12228 / 1C / PRS 101 / PAO1) OX=208964 GN=xcpS PE=1 SV=1	44061.6	23750.9	26299.8	24422.5	24070	26722.3	41906	81016.5	68297.7	72678	70505.9	70468.4	77254.7	65757	81194.6	43132.7	28534.8	26474.1	40904.1	33189.5	56297.2	120128	53646.4	35353	57135.1	31573.3	27815.7	79128.8	85386	92642	85727.3	29524.2	93202.5	96807.7	22818.5	17588.2	68299.5	81678.9	35024.1	59164.2
Q00514	Q00514	xcpT	Type II secretion system core protein G	Q00514	GSPG_PSEAE	>sp|Q00514|GSPG_PSEAE Type II secretion system core protein G OS=Pseudomonas aeruginosa (strain ATCC 15692 / DSM 22644 / CIP 104116 / JCM 14847 / LMG 12228 / 1C / PRS 101 / PAO1) OX=208964 GN=xcpT PE=1 SV=1	15448.7	484461	443362	435929	422796	417353	583554	920169	747236	1083359	740244	793158	785289	892661	918617	592085	403831	286243	747487	343291	869568	1.14284e+06	692972	359638	535815	507907	385940	963016	1.00615e+06	988112	847980	321489	1.27859e+06	1.07915e+06	262609	275882	644809	890976	390029	672722
Q00515	Q00515	xcpU	Type II secretion system protein H	Q00515	GSPH_PSEAE	>sp|Q00515|GSPH_PSEAE Type II secretion system protein H OS=Pseudomonas aeruginosa (strain ATCC 15692 / DSM 22644 / CIP 104116 / JCM 14847 / LMG 12228 / 1C / PRS 101 / PAO1) OX=208964 GN=xcpU PE=1 SV=1	19148	5731.26	5495.8	5076.23	5058.4	4347.27	7020.74	19016.4	16895.7	12292.7	16168.2	11603.9	15056.5	9785.55	15661.4	7110.22	3555.15	32374.6	1163.29	4518.14	11945.7	19194.1	10813.4	6883.93	9403.39	2272.29	4511.3	16671.7	27905.7	16965.5	17369.3	5987.28	22095.3	20697.9	2415.92	11196.7	21723.3	18645.2	8763.81	13134.5
Q00516	Q00516	xcpV	Type II secretion system protein I	Q00516	GSPI_PSEAE	>sp|Q00516|GSPI_PSEAE Type II secretion system protein I OS=Pseudomonas aeruginosa (strain ATCC 15692 / DSM 22644 / CIP 104116 / JCM 14847 / LMG 12228 / 1C / PRS 101 / PAO1) OX=208964 GN=xcpV PE=1 SV=1	14380.5	7376.58	4284.65	5461.87	5243.83	7518.75	11276.3	29964.1	30735.3	26994.6	29788.8	22630.3	23802.8	27405	26863.1	10768.4	7407.3	6056.55	10111.8	7767.33	33069.4	37437.2	19276.4	13115.5	18628.1	11309.8	8736.02	29973.2	22301.1	25946.7	29580.1	9345.13	25119.5	30247.8	7077.15	4619.66	21983.7	24336.3	9997.51	26909.4
Q00517	Q00517	xcpW	Type II secretion system protein J	Q00517	GSPJ_PSEAE	>sp|Q00517|GSPJ_PSEAE Type II secretion system protein J OS=Pseudomonas aeruginosa (strain ATCC 15692 / DSM 22644 / CIP 104116 / JCM 14847 / LMG 12228 / 1C / PRS 101 / PAO1) OX=208964 GN=xcpW PE=1 SV=1	27130.6	11599.5	11006.6	10753.3	10811.1	12655	17693.4	36200	34612.5	27091.3	22923.5	23348.2	31713.3	24828.1	25957.9	18919.3	10445.6	14836.2	18904.5	8246.78	28319.8	39801.8	15683.4	15783.6	18016.5	15143.3	12150.5	29518.7	22062.6	31248.7	26622.9	17360.6	29984.1	30846.3	10830.7	13145.2	24060.7	26976.8	14829.7	26586.8
Q00518	Q00518	xcpX	Type II secretion system protein K	Q00518	GSPK_PSEAE	>sp|Q00518|GSPK_PSEAE Type II secretion system protein K OS=Pseudomonas aeruginosa (strain ATCC 15692 / DSM 22644 / CIP 104116 / JCM 14847 / LMG 12228 / 1C / PRS 101 / PAO1) OX=208964 GN=xcpX PE=1 SV=1	37000.1	23634.7	19796.3	8375.25	20247.4	11468.4	14113.9	25738.3	27235.9	37810.5	31493.8	29439.6	35307.5	24177.5	36908.8	16867	10161.5	17830.6	8626.03	12615.2	24175.5	51788.6	20274.9	9363.35	21114.8	13775.3	15271.7	31158.1	35681.3	38739.1	32067.3	9724.62	34867	25183.9	11440.2	14432.6	17753.1	43178	14318.7	26780.3
Q00934	Q00934	pilR	Response regulator protein PilR	Q00934	PILR_PSEAE	>sp|Q00934|PILR_PSEAE Response regulator protein PilR OS=Pseudomonas aeruginosa (strain ATCC 15692 / DSM 22644 / CIP 104116 / JCM 14847 / LMG 12228 / 1C / PRS 101 / PAO1) OX=208964 GN=pilR PE=1 SV=2	49737.1	207430	194475	196855	196092	205052	183743	123057	158063	131752	136953	129434	145411	136289	126077	189189	100731	125203	130796	152402	131561	167968	211519	161882	126290	127748	136270	145522	115701	151957	154127	165241	146090	134365	137945	68462	84155.7	167094	165162	147562
Q01269	Q01269	pheC	Cyclohexadienyl dehydratase	Q01269	PHEC_PSEAE	>sp|Q01269|PHEC_PSEAE Cyclohexadienyl dehydratase OS=Pseudomonas aeruginosa (strain ATCC 15692 / DSM 22644 / CIP 104116 / JCM 14847 / LMG 12228 / 1C / PRS 101 / PAO1) OX=208964 GN=pheC PE=1 SV=2	30447.8	41431.2	43679.2	38165.8	50564.8	48316.7	53287.8	58473.7	36796.9	59570	64530.5	23828.9	60052.7	59757.7	45619.5	20899.4	35089.3	70069.5	100160	21951.7	57636.1	55891.2	48880.8	43532.9	49185	35051.3	44426.3	51889.3	23016.8	80275.1	49283	48064.6	60148.7	58495.7	28681.3	33844.5	33053.1	43275.5	59514.8	35192.3
Q03023	Q03023	aprA	Serralysin	Q03023	APRA_PSEAE	>sp|Q03023|APRA_PSEAE Serralysin OS=Pseudomonas aeruginosa (strain ATCC 15692 / DSM 22644 / CIP 104116 / JCM 14847 / LMG 12228 / 1C / PRS 101 / PAO1) OX=208964 GN=aprA PE=1 SV=1	50432.9	NaN	721.358	347.92	8231.01	703.921	29.4508	5352.88	9529.75	2317.53	5601.45	1401.59	882.177	904.463	725.078	605.697	1659.13	6679.56	418.974	209.021	926.237	10877.3	901.112	1697.04	564.559	1410.24	936.89	11085.9	5873.04	8120.32	6854.93	643.342	8350.87	4397.86	1301.38	1120.23	67.1964	6557.8	484.213	3918.79
Q03024	Q03024	aprD	Alkaline protease secretion ATP-binding protein AprD	Q03024	APRD_PSEAE	>sp|Q03024|APRD_PSEAE Alkaline protease secretion ATP-binding protein AprD OS=Pseudomonas aeruginosa (strain ATCC 15692 / DSM 22644 / CIP 104116 / JCM 14847 / LMG 12228 / 1C / PRS 101 / PAO1) OX=208964 GN=aprD PE=3 SV=1	63670.8	10100.2	6703.17	10783.6	8941.19	10815.1	13780.8	43173.1	50753.7	24581.7	22503.6	14745.6	16021.8	15830.6	23872.6	11351.7	9120.08	15569.9	9543	7608.3	9992.25	28503.8	15109.7	32562.4	21862	9934.98	13724.6	54051.2	43075.1	31841.9	53752.1	12906.6	48126.4	47926.7	7852.22	9976.29	17471.6	38923.5	15232.5	11526.7
Q03025	Q03025	aprE	Alkaline protease secretion protein AprE	Q03025	APRE_PSEAE	>sp|Q03025|APRE_PSEAE Alkaline protease secretion protein AprE OS=Pseudomonas aeruginosa (strain ATCC 15692 / DSM 22644 / CIP 104116 / JCM 14847 / LMG 12228 / 1C / PRS 101 / PAO1) OX=208964 GN=aprE PE=3 SV=2	48052.8	24549.7	19443.2	39541.6	33195.8	25926.3	8675.09	54302	65698.2	49696.8	63032.1	13622.4	31804.3	32634	62209.7	42782.1	28175.1	15886.2	6356.58	42793	30034.3	159448	39853	104268	24875.9	19978.6	25440.1	170833	159871	103959	275604	35183.5	98115.9	131293	43581.6	13277.9	33985.9	101755	44831.4	22411.2
Q03026	Q03026	inh	Proteinase inhibitor	Q03026	INH_PSEAE	>sp|Q03026|INH_PSEAE Proteinase inhibitor OS=Pseudomonas aeruginosa (strain ATCC 15692 / DSM 22644 / CIP 104116 / JCM 14847 / LMG 12228 / 1C / PRS 101 / PAO1) OX=208964 GN=inh PE=1 SV=1	13980	2033.87	794.598	1093.06	1718.05	782.806	5886.44	46110.7	73113.3	43506.5	34980.2	18571.4	18778.5	32958	26624.4	NaN	3636.44	18756.3	54360.1	12778.6	31022.1	37657.4	5227.6	18267.4	NaN	5409.25	5908.8	43560.1	41900	70749.3	71948.5	3359.41	49306.9	41273.3	NaN	2226.14	32361.4	28995.6	6609.88	45007.5
Q03027	Q03027	aprF	Alkaline protease secretion protein AprF	Q03027	APRF_PSEAE	>sp|Q03027|APRF_PSEAE Alkaline protease secretion protein AprF OS=Pseudomonas aeruginosa (strain ATCC 15692 / DSM 22644 / CIP 104116 / JCM 14847 / LMG 12228 / 1C / PRS 101 / PAO1) OX=208964 GN=aprF PE=3 SV=1	54471	11620.1	16109.6	8033.82	13090.3	15359.6	10971.9	44389.3	45527.8	42585.3	25290.8	15028.3	15948.9	9428.13	26934.1	15199.2	9243.92	10550.1	13051.6	7372.96	7052.97	72327.9	28460.8	17206.5	7442.34	10875.4	12306.9	59292.2	37703.3	29763.7	69578.3	22496.5	27847	66842.9	17685.8	24652.2	17522.2	42995.4	34306	17950.7
Q03268	Q03268	PA2604	Uncharacterized protein PA2604	Q03268	Y2604_PSEAE	>sp|Q03268|Y2604_PSEAE Uncharacterized protein PA2604 OS=Pseudomonas aeruginosa (strain ATCC 15692 / DSM 22644 / CIP 104116 / JCM 14847 / LMG 12228 / 1C / PRS 101 / PAO1) OX=208964 GN=PA2604 PE=3 SV=1	24106.3	70712.1	64069.5	58906.3	64401.6	57969	49781.4	52915.2	45657.2	64151.5	60581.8	46354.3	54682	46177.7	35500.3	46866.9	27573.6	58680.4	60184.6	56930.8	67978.7	52808.1	3840.48	58547.2	37536.1	38867.2	49736.5	13148.4	51624	48504.9	46626.3	9587.8	41270.1	55166	39238	23645.2	21120.1	61580.3	74245.8	56143.8
Q03456	Q03456	fur	Ferric uptake regulation protein	Q03456	FUR_PSEAE	>sp|Q03456|FUR_PSEAE Ferric uptake regulation protein OS=Pseudomonas aeruginosa (strain ATCC 15692 / DSM 22644 / CIP 104116 / JCM 14847 / LMG 12228 / 1C / PRS 101 / PAO1) OX=208964 GN=fur PE=1 SV=1	15234.5	301785	284819	284114	302141	305799	344284	549695	552840	466753	553765	379446	456494	498378	485690	340995	311762	503022	612899	348560	388175	448797	515918	492948	461504	385652	444718	567981	418476	606903	549506	411868	609812	626374	319925	390008	531566	554367	373220	578527
Q04628	Q04628	PA1545	Uncharacterized protein PA1545	Q04628	Y1545_PSEAE	>sp|Q04628|Y1545_PSEAE Uncharacterized protein PA1545 OS=Pseudomonas aeruginosa (strain ATCC 15692 / DSM 22644 / CIP 104116 / JCM 14847 / LMG 12228 / 1C / PRS 101 / PAO1) OX=208964 GN=PA1545 PE=4 SV=1	16694	8247.02	5871.83	4862.24	7401.62	6564.74	2908.83	6918.53	9980.77	4902.43	2775.09	1359.46	5750.37	2048.48	6119.11	2204.38	3388.64	8588.42	1420.11	1163.1	1533.62	2946.62	2340.7	1655.94	4144.58	5312.22	3655.58	13083.9	2290.63	4198.41	15990.9	3125.75	7984.88	5997.63	3716.67	5514.89	2530.38	16380.5	836.546	6828.31
Q04633	Q04633	apt	Adenine phosphoribosyltransferase	Q04633	APT_PSEAE	>sp|Q04633|APT_PSEAE Adenine phosphoribosyltransferase OS=Pseudomonas aeruginosa (strain ATCC 15692 / DSM 22644 / CIP 104116 / JCM 14847 / LMG 12228 / 1C / PRS 101 / PAO1) OX=208964 GN=apt PE=3 SV=1	19804.7	62616.2	62392.8	64907.6	67713.4	70253.7	77606.5	104867	109142	75804.2	105043	70892.4	82710.5	98584.2	84665.2	69585.2	94066.4	114416	182651	95324.5	75551.4	92369	117256	96540.1	108283	74566.6	66361.2	100212	86296.2	98037.5	120504	87527.2	111707	97373.6	94097.4	75804	116015	116375	111816	167851
Q04803	Q04803	pfeR	Transcriptional activator protein PfeR	Q04803	PFER_PSEAE	>sp|Q04803|PFER_PSEAE Transcriptional activator protein PfeR OS=Pseudomonas aeruginosa (strain ATCC 15692 / DSM 22644 / CIP 104116 / JCM 14847 / LMG 12228 / 1C / PRS 101 / PAO1) OX=208964 GN=pfeR PE=3 SV=1	34024.4	5484.07	9845.78	9770.11	6877.56	8827.92	25847.3	2086.48	8984.64	6934.4	4090.47	5939.96	5165.24	3756.75	5193.57	23938.3	9263.67	8488.96	256.757	4340.05	5904.72	2743.99	5366.65	5832.19	5730.36	9213.99	8812.04	5128.8	7263.88	6270.25	4936.25	13268.2	6487.59	4159.01	13527.8	8827.64	4296.35	3004.63	3314.58	11926.8
Q04804	Q04804	pfeS	Sensor protein PfeS	Q04804	PFES_PSEAE	>sp|Q04804|PFES_PSEAE Sensor protein PfeS OS=Pseudomonas aeruginosa (strain ATCC 15692 / DSM 22644 / CIP 104116 / JCM 14847 / LMG 12228 / 1C / PRS 101 / PAO1) OX=208964 GN=pfeS PE=1 SV=2	50539.9	8091.19	6583.13	5821.68	6219.47	6859.2	14309.9	8213.22	3896.71	4105.19	10078.7	10967.7	5055.39	5863.67	3295.12	27176.1	8194.43	5838.85	35865.5	7854.96	29625.3	768.708	6661.13	7272.02	6137.64	6905.96	6526.35	5517.31	4911.52	5931.4	9926.65	13757.8	5142.43	9698.77	16634.5	1990.96	4063.66	3390.39	13766	5428.32
Q05097	Q05097	lecA	PA-I galactophilic lectin	Q05097	PA1L_PSEAE	>sp|Q05097|PA1L_PSEAE PA-I galactophilic lectin OS=Pseudomonas aeruginosa (strain ATCC 15692 / DSM 22644 / CIP 104116 / JCM 14847 / LMG 12228 / 1C / PRS 101 / PAO1) OX=208964 GN=lecA PE=1 SV=2	12893.4	1.2593	884.785	1284.96	1670.01	1037.23	6416.59	394310	531217	694778	650140	1353.14	158705	82195.4	110933	5936.54	NaN	46952.7	5109.64	942.055	53968.5	12394.6	1807.3	104924	133387	218.365	48561.5	187826	21527.2	824730	252254	14345.9	523620	239625	NaN	1610.88	31584.9	399254	3064.73	125512
Q05098	Q05098	pfeA	Ferric enterobactin receptor	Q05098	PFEA_PSEAE	>sp|Q05098|PFEA_PSEAE Ferric enterobactin receptor OS=Pseudomonas aeruginosa (strain ATCC 15692 / DSM 22644 / CIP 104116 / JCM 14847 / LMG 12228 / 1C / PRS 101 / PAO1) OX=208964 GN=pfeA PE=1 SV=1	80967.5	7623.87	7337	5437.04	5360.77	6926.47	27952	1803.35	2658.4	1529.04	4049.03	1174.38	4911.17	1097.42	3430.12	15941.5	5322.95	6405.92	2490.37	6286.83	1314.12	1103.62	1047.45	7522.46	3175.57	4870.92	7693.22	2747.66	4746.66	3305.52	1437.76	10028	885.211	4900.76	7345.56	11942	1829.03	1873.94	4248.98	16988.6
Q06062	Q06062	algF	Alginate biosynthesis protein AlgF	Q06062	ALGF_PSEAE	>sp|Q06062|ALGF_PSEAE Alginate biosynthesis protein AlgF OS=Pseudomonas aeruginosa (strain ATCC 15692 / DSM 22644 / CIP 104116 / JCM 14847 / LMG 12228 / 1C / PRS 101 / PAO1) OX=208964 GN=algF PE=1 SV=2	22834.1	3645.84	4374.88	3091.91	714.234	691.734	735.8	3208.96	5042.08	3302.65	1601.83	1989.18	4222.56	3436.77	2433.61	525.646	6370.83	2730.45	4659.99	2702.3	458.454	3253.47	5080.69	2716.01	1394.58	26860.9	1973.63	7343.5	6653.91	1111.92	5499.06	3752.81	6608.03	3158.47	6048.84	7.532e+06	4033.99	2805.77	1309.41	4295.84
Q06198	Q06198	algU	RNA polymerase sigma-H factor	Q06198	RPSH_PSEAE	>sp|Q06198|RPSH_PSEAE RNA polymerase sigma-H factor OS=Pseudomonas aeruginosa (strain ATCC 15692 / DSM 22644 / CIP 104116 / JCM 14847 / LMG 12228 / 1C / PRS 101 / PAO1) OX=208964 GN=algU PE=1 SV=1	22196.2	123194	120534	109179	117300	114291	123257	176493	166758	164198	168208	99413.5	159679	139762	168048	125059	178504	159029	155303	136507	119310	138340	127958	127741	139818	189463	122994	188357	155074	199684	188651	130802	167523	171408	152901	534586	178458	186579	129840	183114
Q06553	Q06553	prtR	HTH-type transcriptional regulator PrtR	Q06553	PRTR_PSEAE	>sp|Q06553|PRTR_PSEAE HTH-type transcriptional regulator PrtR OS=Pseudomonas aeruginosa (strain ATCC 15692 / DSM 22644 / CIP 104116 / JCM 14847 / LMG 12228 / 1C / PRS 101 / PAO1) OX=208964 GN=prtR PE=2 SV=1	28111.9	10398.3	11192.9	8670.03	10996.5	11903.9	14722	11710.7	11104.7	11400.4	10721.8	13757.7	14164	12109	13146.8	12881.3	17417.8	17089.1	11255.2	22311.6	11590.7	12967	7262.88	12595.9	16225.4	9959.14	23090.1	12043.4	16593.5	13013.3	17793.9	19449.1	13523.7	14901.3	15383.5	46704.6	18542.7	12058.7	13530.9	8565.43
Q06579	Q06579	imm2	Pyocin-S2 immunity protein	Q06579	IMM2_PSEAE	>sp|Q06579|IMM2_PSEAE Pyocin-S2 immunity protein OS=Pseudomonas aeruginosa (strain ATCC 15692 / DSM 22644 / CIP 104116 / JCM 14847 / LMG 12228 / 1C / PRS 101 / PAO1) OX=208964 GN=imm2 PE=1 SV=1	10039.4	146605	112587	115610	129357	124202	60257.5	245281	164982	11360.3	6188.75	15955.6	14255.6	20423.2	20870.5	15260.9	4630.09	9693.83	8625.67	22875.1	12738.4	15118.5	12590.1	10697.2	18446.2	13312.5	103104	74779.4	10703.2	20998.3	17040	15532.3	22399	207445	24181.7	54824.1	136362	21907.2	5692.89	19878.2
Q06584	Q06584	pys2	Pyocin-S2	Q06584	PYS2_PSEAE	>sp|Q06584|PYS2_PSEAE Pyocin-S2 OS=Pseudomonas aeruginosa (strain ATCC 15692 / DSM 22644 / CIP 104116 / JCM 14847 / LMG 12228 / 1C / PRS 101 / PAO1) OX=208964 GN=pys2 PE=1 SV=3	73853.8	1885.54	23249.5	25735.8	21707.3	24354.6	206.833	4781	34012.9	4923.27	15833.7	3109.96	15003	4275.18	1285.72	84.8103	2032.61	4203.38	7230.62	2403.73	6377.36	4697.84	14457.6	2431.17	1742.13	3741.45	5151.33	7367.43	9116.82	15096.4	4138.58	4449.67	5894.58	6447.82	7485.92	6758.85	12100.6	4586.65	1984.35	4360.42
Q07806	Q07806	mrcA	Penicillin-binding protein 1A	Q07806	PBPA_PSEAE	>sp|Q07806|PBPA_PSEAE Penicillin-binding protein 1A OS=Pseudomonas aeruginosa (strain ATCC 15692 / DSM 22644 / CIP 104116 / JCM 14847 / LMG 12228 / 1C / PRS 101 / PAO1) OX=208964 GN=mrcA PE=1 SV=2	91199.5	168843	216065	202335	205964	206645	211174	184570	155825	156823	141654	137213	177427	122466	151157	167822	132780	171279	186795	142181	94347.8	205170	148919	146904	178686	197973	180486	155559	155794	143527	150635	137568	157799	176235	131524	385271	154513	159271	157489	137033
Q14T72	Q14T72	fdnG	Formate dehydrogenase-O, major subunit	Q14T72	Q14T72_PSEAE	>tr|Q14T72|Q14T72_PSEAE Formate dehydrogenase-O, major subunit OS=Pseudomonas aeruginosa (strain ATCC 15692 / DSM 22644 / CIP 104116 / JCM 14847 / LMG 12228 / 1C / PRS 101 / PAO1) OX=208964 GN=fdnG PE=3 SV=2	114162	167534	175548	155522	175888	161866	125931	150542	142777	212433	132873	185192	96557.9	104967	77596.2	114908	40145.9	139814	472305	156294	194216	361241	283462	10560.5	44743.5	186241	114339	182107	45831.1	134559	111404	80104.7	156592	141395	95251.1	297375	192259	168122	64686.1	76904.5
Q14T74	Q14T74	pntAA	proton-translocating NAD(P)(+) transhydrogenase	Q14T74	Q14T74_PSEAE	>tr|Q14T74|Q14T74_PSEAE proton-translocating NAD(P)(+) transhydrogenase OS=Pseudomonas aeruginosa (strain ATCC 15692 / DSM 22644 / CIP 104116 / JCM 14847 / LMG 12228 / 1C / PRS 101 / PAO1) OX=208964 GN=pntAA PE=4 SV=1	38682.4	94856.7	91691.5	105867	100088	88346.7	92342.3	146510	205951	244743	197097	129955	162823	181667	144386	67449.2	58341.9	65176.6	193057	71785.6	239299	228885	139232	142773	137690	60518.7	112088	97447.5	87382.5	248439	205736	80266.5	239080	166599	44849.7	93188.7	54748.4	293199	66367.8	226616
Q51342	Q51342	purF	Amidophosphoribosyltransferase	Q51342	PUR1_PSEAE	>sp|Q51342|PUR1_PSEAE Amidophosphoribosyltransferase OS=Pseudomonas aeruginosa (strain ATCC 15692 / DSM 22644 / CIP 104116 / JCM 14847 / LMG 12228 / 1C / PRS 101 / PAO1) OX=208964 GN=purF PE=3 SV=3	55370.1	389833	414344	377390	400391	415603	372968	384654	405360	473420	449151	484050	475540	437393	399090	456840	453170	470428	436431	327657	331346	468057	389523	376902	411942	423038	337596	442462	331001	357192	402095	433248	380089	447075	446075	700601	410568	417912	365811	394403
Q51344	Q51344	asd	Aspartate-semialdehyde dehydrogenase	Q51344	DHAS_PSEAE	>sp|Q51344|DHAS_PSEAE Aspartate-semialdehyde dehydrogenase OS=Pseudomonas aeruginosa (strain ATCC 15692 / DSM 22644 / CIP 104116 / JCM 14847 / LMG 12228 / 1C / PRS 101 / PAO1) OX=208964 GN=asd PE=1 SV=2	40494.7	361838	386628	379433	399934	431737	354530	496776	553852	541314	622878	539522	608755	664990	521572	458937	552932	656861	373851	496143	226855	323632	421511	533344	645540	455947	539024	542019	388569	592417	461389	656721	513737	504468	528190	577318	552214	533803	702941	460005
Q51363	Q51363	nadB	L-aspartate oxidase	Q51363	NADB_PSEAE	>sp|Q51363|NADB_PSEAE L-aspartate oxidase OS=Pseudomonas aeruginosa (strain ATCC 15692 / DSM 22644 / CIP 104116 / JCM 14847 / LMG 12228 / 1C / PRS 101 / PAO1) OX=208964 GN=nadB PE=3 SV=1	60004.9	60297.3	90650.4	74297.4	104586	107142	77423.9	70648.4	71083.3	82917.3	58638.7	26188	69178.5	38668.1	51051	40544.1	52520.4	66369.4	47140.3	26267	7940.04	45899	43236.5	40833.4	63229.2	58795.4	50625.2	53557.2	26741.5	74091.9	56266.5	66254.6	65283.9	55202.5	44398.1	86424.4	41244.2	70336.9	35476.9	60064.4
Q51366	Q51366	gmd	GDP-mannose 4,6-dehydratase	Q51366	GM4D_PSEAE	>sp|Q51366|GM4D_PSEAE GDP-mannose 4,6-dehydratase OS=Pseudomonas aeruginosa (strain ATCC 15692 / DSM 22644 / CIP 104116 / JCM 14847 / LMG 12228 / 1C / PRS 101 / PAO1) OX=208964 GN=gmd PE=1 SV=2	36399.3	110975	131129	128088	130560	136895	163977	175451	144309	234750	183081	125883	221596	200411	201152	152014	87180.4	93235.9	70947.4	103338	214830	177497	224217	157590	136369	199133	151112	191072	135328	297423	215431	151251	186157	176220	49052	107288	80652.4	340030	160970	209316
Q51368	Q51368	tonB	Protein TonB	Q51368	TONB_PSEAE	>sp|Q51368|TONB_PSEAE Protein TonB OS=Pseudomonas aeruginosa (strain ATCC 15692 / DSM 22644 / CIP 104116 / JCM 14847 / LMG 12228 / 1C / PRS 101 / PAO1) OX=208964 GN=tonB PE=1 SV=2	36892.1	30710.4	29740.4	30159.5	28613.3	32883.4	60880.7	29929.7	29899.5	32109.6	27980.7	72829.2	33226.7	33627.3	35861.3	88778.4	41415.2	38053.8	14596.5	44654.5	16717.1	29479	14558	39401.4	41136.4	39407.2	19625.2	26908.6	27981.6	27678.7	34925.6	57867.9	26537.2	35706.1	55190.4	43400.5	28226.3	27489.6	28345.1	68241.6
Q51371	Q51371	algG	Mannuronan C5-epimerase	Q51371	ALGG_PSEAE	>sp|Q51371|ALGG_PSEAE Mannuronan C5-epimerase OS=Pseudomonas aeruginosa (strain ATCC 15692 / DSM 22644 / CIP 104116 / JCM 14847 / LMG 12228 / 1C / PRS 101 / PAO1) OX=208964 GN=algG PE=1 SV=1	59802	4788.5	4762.25	5773.4	6078.7	3902.47	1373.35	2947.13	870.446	1681.88	1746.71	5193.53	5375.82	850.387	4456.16	1064.5	8312.35	2762.41	3825.15	1959.32	579.07	3157.96	7031.85	306.945	2199.79	394.844	3575.18	1668.22	2653.66	5136.36	4056.59	4865.01	3071.75	3389.07	6492.04	1034.6	1198.54	2389.37	5460.47	1735.45
Q51372	Q51372	algX	Alginate biosynthesis protein AlgX	Q51372	ALGX_PSEAE	>sp|Q51372|ALGX_PSEAE Alginate biosynthesis protein AlgX OS=Pseudomonas aeruginosa (strain ATCC 15692 / DSM 22644 / CIP 104116 / JCM 14847 / LMG 12228 / 1C / PRS 101 / PAO1) OX=208964 GN=algX PE=1 SV=2	52596.2	79304.8	77186.8	103181	96768.9	73851.9	40851.2	97218.1	146287	106068	138682	71820.4	87888.8	89707.4	123225	62035	110545	140069	116306	46310.3	114181	204894	110050	102634	96785.1	103904	113185	106033	52785.9	97705	87841	95810.7	186221	123638	100161	993931	72777.7	127775	88299.3	123157
Q51373	Q51373	gacA	Response regulator GacA	Q51373	GACA_PSEAE	>sp|Q51373|GACA_PSEAE Response regulator GacA OS=Pseudomonas aeruginosa (strain ATCC 15692 / DSM 22644 / CIP 104116 / JCM 14847 / LMG 12228 / 1C / PRS 101 / PAO1) OX=208964 GN=gacA PE=3 SV=2	23608.5	81611.2	84921.6	87336.9	87716.9	82932.6	77923.7	79617.4	108304	82353.9	87686.7	58622.3	65275.2	73979.6	63363.4	42701.8	35638.5	91399.4	88062.6	48231.2	69885	77347.9	70270.1	71282.7	68578.2	67169.7	72933.2	76651.2	46959.7	80376.4	72720.1	55555.7	87923.4	85683.1	29509.9	55193.3	54951.7	92555.5	41619.4	109827
Q51375	Q51375	leuB	3-isopropylmalate dehydrogenase	Q51375	LEU3_PSEAE	>sp|Q51375|LEU3_PSEAE 3-isopropylmalate dehydrogenase OS=Pseudomonas aeruginosa (strain ATCC 15692 / DSM 22644 / CIP 104116 / JCM 14847 / LMG 12228 / 1C / PRS 101 / PAO1) OX=208964 GN=leuB PE=3 SV=2	39120.8	156322	152112	141699	148768	127569	123925	158143	178907	167219	220872	145347	174699	212821	162965	100784	122834	203975	219079	160136	163177	181239	204420	158108	173581	161756	152000	138607	114067	191734	134819	114138	169359	169569	100996	125214	136561	178474	134758	147290
Q51382	Q51382	hscA	Chaperone protein HscA homolog	Q51382	HSCA_PSEAE	>sp|Q51382|HSCA_PSEAE Chaperone protein HscA homolog OS=Pseudomonas aeruginosa (strain ATCC 15692 / DSM 22644 / CIP 104116 / JCM 14847 / LMG 12228 / 1C / PRS 101 / PAO1) OX=208964 GN=hscA PE=3 SV=2	66446.5	195709	189442	187385	193091	195295	172337	189126	181587	167669	182011	164245	156453	169206	166291	163244	195491	200333	123354	191284	190188	122907	147748	202636	222704	183987	208949	240748	242321	192069	206523	206156	188394	204301	230591	245292	243328	188445	223563	210370
Q51383	Q51383	fdx	2Fe-2S ferredoxin	Q51383	FER_PSEAE	>sp|Q51383|FER_PSEAE 2Fe-2S ferredoxin OS=Pseudomonas aeruginosa (strain ATCC 15692 / DSM 22644 / CIP 104116 / JCM 14847 / LMG 12228 / 1C / PRS 101 / PAO1) OX=208964 GN=fdx PE=3 SV=2	12240.8	104751	119773	112224	128865	144206	112083	200655	303108	193118	259118	126920	150395	212115	187668	177072	271599	113175	208344	102447	100598	201529	137612	117352	267910	132426	108365	271969	201823	198690	248940	156851	208296	141847	163768	201937	170096	178187	143771	176331
Q51384	Q51384	PA3808	Uncharacterized protein PA3808	Q51384	Y3808_PSEAE	>sp|Q51384|Y3808_PSEAE Uncharacterized protein PA3808 OS=Pseudomonas aeruginosa (strain ATCC 15692 / DSM 22644 / CIP 104116 / JCM 14847 / LMG 12228 / 1C / PRS 101 / PAO1) OX=208964 GN=PA3808 PE=4 SV=1	7801.76	29565.7	65660	45327	65286.1	70501.9	37989.3	93776.7	100255	87960.9	104278	18349.6	95717.2	39577.9	70380.5	44277.9	93161.5	66251.1	49571.8	29028.5	8274.57	34528.5	35593.6	68136.7	59445.3	59947.5	59728.7	115825	16695.9	97430.3	124812	79179.3	105800	49119.8	40917.7	111947	98675.8	94789.1	20764.3	77855.5
Q51385	Q51385	rlmN	Dual-specificity RNA methyltransferase RlmN	Q51385	RLMN_PSEAE	>sp|Q51385|RLMN_PSEAE Dual-specificity RNA methyltransferase RlmN OS=Pseudomonas aeruginosa (strain ATCC 15692 / DSM 22644 / CIP 104116 / JCM 14847 / LMG 12228 / 1C / PRS 101 / PAO1) OX=208964 GN=rlmN PE=3 SV=2	41699.9	85420.5	84190.1	78045.1	77421.6	86515.5	80887.1	56271.3	50230.3	68378.5	47938.1	56500.6	52365.7	43256.6	51088.3	78810.1	70935.4	36687.7	34011.5	39666.7	39398.2	42778	47465.1	53428.2	60293.1	81102.9	64761.9	66239.1	64593.1	61072.8	62691.5	60010.4	52167	56380.4	77194.4	102737	57163.8	52040	57820.7	54987.3
Q51389	Q51389	glpF	Glycerol uptake facilitator protein	Q51389	GLPF_PSEAE	>sp|Q51389|GLPF_PSEAE Glycerol uptake facilitator protein OS=Pseudomonas aeruginosa (strain ATCC 15692 / DSM 22644 / CIP 104116 / JCM 14847 / LMG 12228 / 1C / PRS 101 / PAO1) OX=208964 GN=glpF PE=3 SV=2	28913	29393.1	39459.3	34997.3	38329.9	36502.1	148955	108583	66185.8	108784	129327	77955.6	132461	142051	165447	182781	65971.2	108508	72499.7	165480	166941	122579	455.758	36652.1	NaN	57768.7	33529.2	38488.6	78172.8	18759.6	38698.7	29064.1	41703.8	21249.7	55416.6	164255	116873	18848.2	59946.2	37160.9
Q51390	Q51390	glpK2	Glycerol kinase 2	Q51390	GLPK2_PSEAE	>sp|Q51390|GLPK2_PSEAE Glycerol kinase 2 OS=Pseudomonas aeruginosa (strain ATCC 15692 / DSM 22644 / CIP 104116 / JCM 14847 / LMG 12228 / 1C / PRS 101 / PAO1) OX=208964 GN=glpK2 PE=3 SV=2	55966.2	225960	208524	202986	210083	215530	912806	1.08572e+06	804288	1.00939e+06	1.23085e+06	883997	1.06866e+06	1.55064e+06	1.52127e+06	2.02596e+06	560316	810084	654315	1.11303e+06	1.7589e+06	812640	303804	420167	16440.4	306151	328952	530136	802744	389520	466668	435349	543924	316747	539987	631765	1.13456e+06	408249	533415	386241
Q51391	Q51391	glpR	Glycerol-3-phosphate regulon repressor	Q51391	GLPR_PSEAE	>sp|Q51391|GLPR_PSEAE Glycerol-3-phosphate regulon repressor OS=Pseudomonas aeruginosa (strain ATCC 15692 / DSM 22644 / CIP 104116 / JCM 14847 / LMG 12228 / 1C / PRS 101 / PAO1) OX=208964 GN=glpR PE=3 SV=2	27568.3	34523.4	42980.5	33661.3	39604.5	37001	48037.5	42648.4	31473.7	32948.8	35837.9	31438.6	34535.3	45134.9	43124.9	67602.9	35292.8	48564.3	36395.7	37263.1	44460.9	31326.1	37705.8	40795.5	48171.2	41859.2	43954.7	40718.8	54154.5	34338.2	48092.7	43039.7	48665.5	31735.4	46598.9	70388.4	69977.5	39378.8	40565	29348.8
Q51393	Q51393	algJ	Probable alginate O-acetylase AlgJ	Q51393	ALGJ_PSEAE	>sp|Q51393|ALGJ_PSEAE Probable alginate O-acetylase AlgJ OS=Pseudomonas aeruginosa (strain ATCC 15692 / DSM 22644 / CIP 104116 / JCM 14847 / LMG 12228 / 1C / PRS 101 / PAO1) OX=208964 GN=algJ PE=3 SV=1	43106.7	101144	106495	121277	117285	145894	79236.8	70419.5	63582.5	67304.5	91606	82535.4	72015.8	77203.2	65904.5	47819.9	56795.8	51736.2	95096.9	82648.2	77718.6	94942	129416	80274.1	73730.7	79021.8	64371.9	56330.1	50697.3	73549.8	46358	78367.7	48052.1	88917.7	77055.8	36344.2	100340	73466.6	81054.3	75554.9
Q51404	Q51404	fumC2	Fumarate hydratase class II 2	Q51404	FUMC2_PSEAE	>sp|Q51404|FUMC2_PSEAE Fumarate hydratase class II 2 OS=Pseudomonas aeruginosa (strain ATCC 15692 / DSM 22644 / CIP 104116 / JCM 14847 / LMG 12228 / 1C / PRS 101 / PAO1) OX=208964 GN=fumC2 PE=1 SV=1	48695.8	39708.7	49778.6	42590.7	49602.4	52009.9	68944.7	44016.8	58007	47344.9	23324.5	49413.9	127126	63185.2	86180.3	74132.6	43261	9383.92	66441.7	36532.3	36015.4	15912.8	13729.3	173162	73048.9	12502.6	90859.2	49084.3	41645.4	40455.4	48938.3	68645.5	45672.5	40442.9	207952	18313.7	14271	33178	131369	106950
Q51422	Q51422	aspS	Aspartate--tRNA(Asp/Asn) ligase	Q51422	SYDND_PSEAE	>sp|Q51422|SYDND_PSEAE Aspartate--tRNA(Asp/Asn) ligase OS=Pseudomonas aeruginosa (strain ATCC 15692 / DSM 22644 / CIP 104116 / JCM 14847 / LMG 12228 / 1C / PRS 101 / PAO1) OX=208964 GN=aspS PE=1 SV=2	66207.6	814702	836378	795828	869612	884000	861241	823769	692648	745150	692382	602218	742571	626074	683755	795623	825489	699523	564843	647682	439667	560132	708996	716389	663195	735777	706873	761863	675766	775326	798539	764469	745490	693936	935210	844385	708330	722238	758681	849586
Q51423	Q51423	pmpR	Transcriptional regulatory protein PmpR	Q51423	PMPR_PSEAE	>sp|Q51423|PMPR_PSEAE Transcriptional regulatory protein PmpR OS=Pseudomonas aeruginosa (strain ATCC 15692 / DSM 22644 / CIP 104116 / JCM 14847 / LMG 12228 / 1C / PRS 101 / PAO1) OX=208964 GN=pmpR PE=1 SV=2	26556.8	112764	126841	126187	117731	125085	148849	193658	220829	200868	210650	164009	237960	216590	205816	183847	242683	179117	167894	189901	160452	143469	192176	151777	169511	141164	163883	197867	225594	251074	216086	188991	274527	185087	140709	184402	126012	226722	161737	207236
Q51424	Q51424	ruvC	Crossover junction endodeoxyribonuclease RuvC	Q51424	RUVC_PSEAE	>sp|Q51424|RUVC_PSEAE Crossover junction endodeoxyribonuclease RuvC OS=Pseudomonas aeruginosa (strain ATCC 15692 / DSM 22644 / CIP 104116 / JCM 14847 / LMG 12228 / 1C / PRS 101 / PAO1) OX=208964 GN=ruvC PE=1 SV=1	18556.5	17113.6	23925.8	18057.5	24309.8	21290.6	24542.2	22651.4	24011.2	23225.3	19519.7	16504.3	21244.2	13963.9	20157.7	18493.6	15927.4	18988.4	30017.9	15414	7841.14	18433.9	16955.9	13731.1	23031.8	17304.1	18194.7	20235	12045	18876.1	15940.3	18159.1	18363.3	21355.7	15863.5	17130.6	20349.1	19221.7	12629.9	24187.1
Q51425	Q51425	ruvA	Holliday junction branch migration complex subunit RuvA	Q51425	RUVA_PSEAE	>sp|Q51425|RUVA_PSEAE Holliday junction branch migration complex subunit RuvA OS=Pseudomonas aeruginosa (strain ATCC 15692 / DSM 22644 / CIP 104116 / JCM 14847 / LMG 12228 / 1C / PRS 101 / PAO1) OX=208964 GN=ruvA PE=1 SV=1	21959.6	113154	117786	114711	121082	125327	131683	113081	112531	114544	111705	93477.8	124745	115245	134653	132960	198922	88987.4	127206	113509	81669.6	97156.2	118285	132786	131719	107192	146682	117992	154960	126875	132800	165432	134487	124848	173998	142282	179819	136653	131650	138805
Q51426	Q51426	ruvB	Holliday junction branch migration complex subunit RuvB	Q51426	RUVB_PSEAE	>sp|Q51426|RUVB_PSEAE Holliday junction branch migration complex subunit RuvB OS=Pseudomonas aeruginosa (strain ATCC 15692 / DSM 22644 / CIP 104116 / JCM 14847 / LMG 12228 / 1C / PRS 101 / PAO1) OX=208964 GN=ruvB PE=1 SV=2	38932.7	65966.9	101256	83253	87652	125116	112372	108353	93678.3	104074	75167.7	30165.6	112106	48582.6	70506.4	78675.1	91426.9	65158.1	26649.7	39233.5	2963.33	38955.3	42549.1	63657	68419.5	99997.8	84011.8	95177.8	28729.2	91945.5	91453	85800.1	88647.5	80649	64594.1	351980	107649	107365	51998.5	96276.2
Q51434	Q51434	cheZ	Protein phosphatase CheZ	Q51434	CHEZ_PSEAE	>sp|Q51434|CHEZ_PSEAE Protein phosphatase CheZ OS=Pseudomonas aeruginosa (strain ATCC 15692 / DSM 22644 / CIP 104116 / JCM 14847 / LMG 12228 / 1C / PRS 101 / PAO1) OX=208964 GN=cheZ PE=3 SV=2	25709.7	168746	178373	174924	194558	213186	157764	169337	174781	135355	140830	90780.2	144219	136881	135119	134138	102456	129992	118802	94702.1	126132	116157	173176	168557	142692	140711	155185	216277	122900	188855	179149	150721	171210	174903	116173	51596.4	128746	174949	157731	197364
Q51455	Q51455	cheY	Chemotaxis protein CheY	Q51455	CHEY_PSEAE	>sp|Q51455|CHEY_PSEAE Chemotaxis protein CheY OS=Pseudomonas aeruginosa (strain ATCC 15692 / DSM 22644 / CIP 104116 / JCM 14847 / LMG 12228 / 1C / PRS 101 / PAO1) OX=208964 GN=cheY PE=3 SV=1	13902.2	81009.3	88550.4	114981	63807.7	136517	87912.7	268737	226359	221744	196052	38992.3	230515	91640.2	126990	87755	135692	133799	187973	110511	33711.2	98508.5	91210	138525	187268	114814	75555.7	269043	73628.1	246024	242364	174323	141295	123397	91345.4	52879.7	134859	204480	64401.6	209730
Q51463	Q51463	fliF	Flagellar M-ring protein	Q51463	FLIF_PSEAE	>sp|Q51463|FLIF_PSEAE Flagellar M-ring protein OS=Pseudomonas aeruginosa (strain ATCC 15692 / DSM 22644 / CIP 104116 / JCM 14847 / LMG 12228 / 1C / PRS 101 / PAO1) OX=208964 GN=fliF PE=3 SV=2	64050.2	45882.6	48388	43290.9	45874	43664.4	43726.2	42988	37327.3	41674.2	34759	38203.8	36129.7	37535.5	46244.5	50111.2	37834.7	45251.3	34784.8	42033.1	44592.8	42305.9	51562.8	43200.1	42977.9	37709.5	46530.2	45929.9	46307.8	37756.9	45552	45459.5	43332.5	40337	44092.4	9345.55	28683.8	44466.1	70645.9	48338.1
Q51464	Q51464	fliG	Flagellar motor switch protein FliG	Q51464	FLIG_PSEAE	>sp|Q51464|FLIG_PSEAE Flagellar motor switch protein FliG OS=Pseudomonas aeruginosa (strain ATCC 15692 / DSM 22644 / CIP 104116 / JCM 14847 / LMG 12228 / 1C / PRS 101 / PAO1) OX=208964 GN=fliG PE=3 SV=2	37007.3	106434	102941	98340.7	99816.8	98457.4	86589.6	91242.9	72224.4	72080.7	75541.7	74763.4	66244.9	64538.3	70112.1	79878.3	77199.6	65426.8	79323.6	72872.5	88002.2	88217.4	98316.6	88886.1	85886.3	74664.1	92946.8	78351.6	82926.1	75171.1	77240.5	88299.7	88193.1	88661.4	76048.9	10436.9	60413.2	79176.4	103271	92787.4
Q51465	Q51465	fliM	Flagellar motor switch protein FliM	Q51465	FLIM_PSEAE	>sp|Q51465|FLIM_PSEAE Flagellar motor switch protein FliM OS=Pseudomonas aeruginosa (strain ATCC 15692 / DSM 22644 / CIP 104116 / JCM 14847 / LMG 12228 / 1C / PRS 101 / PAO1) OX=208964 GN=fliM PE=3 SV=2	36281.8	65506	59806.9	61849.9	62344.6	71046.4	76516.4	72449.5	66027	82362.7	69310.3	47001	64189.5	67640.6	64196.4	55418.5	34871.5	81922	49462.8	40470.2	29129	57494.8	62969.1	62144.7	61588.4	47758.4	55224	73981.3	54199.2	87072.2	68307.5	65063.4	73120.5	61380.7	52740.9	19348	45186.7	69575.9	52492.1	84393
Q51466	Q51466	fliN	Flagellar motor switch protein FliN	Q51466	FLIN_PSEAE	>sp|Q51466|FLIN_PSEAE Flagellar motor switch protein FliN OS=Pseudomonas aeruginosa (strain ATCC 15692 / DSM 22644 / CIP 104116 / JCM 14847 / LMG 12228 / 1C / PRS 101 / PAO1) OX=208964 GN=fliN PE=3 SV=2	16619.8	132958	138918	138627	148648	141737	149804	173666	172633	147896	169822	115895	147936	166983	158313	133113	108705	163189	148088	119908	174073	133511	175699	164166	144717	110554	169819	176402	155513	220626	188845	169985	189503	181830	146739	86061.5	148265	228268	139416	214983
Q51467	Q51467	fliO	Flagellar protein FliO	Q51467	FLIO_PSEAE	>sp|Q51467|FLIO_PSEAE Flagellar protein FliO OS=Pseudomonas aeruginosa (strain ATCC 15692 / DSM 22644 / CIP 104116 / JCM 14847 / LMG 12228 / 1C / PRS 101 / PAO1) OX=208964 GN=fliO PE=3 SV=2	15786.6	91330.3	89759.9	94049.7	92086	69638.1	86785.1	82429.3	78029.5	127488	75766.5	38914.7	102839	39339.8	59528.2	69900.4	59878.2	70750.5	79576.9	66916.8	62869.6	91608.3	39153.9	78063.7	73696.3	70578	77288.8	78075.8	79687.7	87161.4	95713.2	62534.1	97931.6	64328.7	67277.5	33139.1	55787.4	88896	49364.9	95638.2
Q51468	Q51468	fliP	Flagellar biosynthetic protein FliP	Q51468	FLIP_PSEAE	>sp|Q51468|FLIP_PSEAE Flagellar biosynthetic protein FliP OS=Pseudomonas aeruginosa (strain ATCC 15692 / DSM 22644 / CIP 104116 / JCM 14847 / LMG 12228 / 1C / PRS 101 / PAO1) OX=208964 GN=fliP PE=3 SV=2	27598.2	19373.6	18781.9	19531.3	20937.9	19719.2	23015.1	18009.2	14378.7	24766.6	14206	12188.4	19094.4	12685.4	15109.5	12809.7	3837.16	20859.2	13994.8	17007.5	21567	15359	9843.69	12225.8	9012.91	10584	9173.63	9443.16	11924.7	13821.4	12332.4	10847.9	14168.9	14014.8	4308.91	6991.45	8378.67	17592.8	10826.6	14431.2
Q51470	Q51470	miaB	tRNA-2-methylthio-N(6)-dimethylallyladenosine synthase	Q51470	MIAB_PSEAE	>sp|Q51470|MIAB_PSEAE tRNA-2-methylthio-N(6)-dimethylallyladenosine synthase OS=Pseudomonas aeruginosa (strain ATCC 15692 / DSM 22644 / CIP 104116 / JCM 14847 / LMG 12228 / 1C / PRS 101 / PAO1) OX=208964 GN=miaB PE=3 SV=2	49978	237454	223592	223707	220348	236180	228613	134660	146737	165645	135926	154597	128463	146220	139760	249199	203828	108211	101864	142180	150052	148979	181690	149661	170305	251519	197989	176291	158562	153425	157499	191096	119499	162158	196081	196506	140379	145692	173313	137084
Q51472	Q51472	ihfA	Integration host factor subunit alpha	Q51472	IHFA_PSEAE	>sp|Q51472|IHFA_PSEAE Integration host factor subunit alpha OS=Pseudomonas aeruginosa (strain ATCC 15692 / DSM 22644 / CIP 104116 / JCM 14847 / LMG 12228 / 1C / PRS 101 / PAO1) OX=208964 GN=ihfA PE=1 SV=3	11471.1	334466	330141	323252	368406	383921	475666	582964	665951	567875	591743	436186	623495	466299	461587	249152	219684	566718	464292	367973	604718	578619	531640	611092	567659	282065	463596	454125	373045	660819	453592	403430	688553	636995	328366	234471	415923	695724	401649	458923
Q51473	Q51473	ihfB	Integration host factor subunit beta	Q51473	IHFB_PSEAE	>sp|Q51473|IHFB_PSEAE Integration host factor subunit beta OS=Pseudomonas aeruginosa (strain ATCC 15692 / DSM 22644 / CIP 104116 / JCM 14847 / LMG 12228 / 1C / PRS 101 / PAO1) OX=208964 GN=ihfB PE=3 SV=1	10632.2	57285.8	65730.9	69134.3	64985.9	73695.8	66799.4	71328.7	81740.2	63327	55910.5	29931.7	65883.3	43922.5	50258.2	37817.4	26622.2	44427.7	65292.8	29619.6	8078.56	49697.8	45658.6	45896.7	75118.3	32288	55574.8	67002.6	27644.8	68440.2	47728.1	52472.8	67778.6	70217.7	41995	34383	50364	69946.5	28575.7	67982.2
Q51480	Q51480	nirF	Protein NirF	Q51480	NIRF_PSEAE	>sp|Q51480|NIRF_PSEAE Protein NirF OS=Pseudomonas aeruginosa (strain ATCC 15692 / DSM 22644 / CIP 104116 / JCM 14847 / LMG 12228 / 1C / PRS 101 / PAO1) OX=208964 GN=nirF PE=1 SV=1	43338.1	80280.7	65227.3	70444.8	72901.9	75497.9	90287.4	43900.1	24200.8	31277.4	33180.8	48810.1	44160.2	20937.6	54728.6	128464	74006.6	28884	29394.6	50157.6	4024.51	15901.2	56734.5	10880.6	4572.57	15821.6	44330.3	55451.4	124419	43041.1	52267.1	56508.2	68249.9	19289.4	146396	17073.6	17654.8	34084.8	75893	22256.2
Q51481	Q51481	nirQ	Denitrification regulatory protein NirQ	Q51481	NIRQ_PSEAE	>sp|Q51481|NIRQ_PSEAE Denitrification regulatory protein NirQ OS=Pseudomonas aeruginosa (strain ATCC 15692 / DSM 22644 / CIP 104116 / JCM 14847 / LMG 12228 / 1C / PRS 101 / PAO1) OX=208964 GN=nirQ PE=2 SV=1	28904	36544.2	33401.6	30040	29878	28322	29479	14016.5	13445.6	23667	35038.3	19932.2	17157.2	32919.6	29725.6	20784.9	39064.1	21919.3	8467.69	14877.3	34242.7	9152.41	23232.5	26954.1	10118.3	21227.7	29176.5	41787.5	49645.1	44289.5	57148.5	24600	45929.6	12491	34608.4	16847.9	12717.1	26149	34560.3	33953
Q51485	Q51485	oprB	Porin B	Q51485	PORB_PSEAE	>sp|Q51485|PORB_PSEAE Porin B OS=Pseudomonas aeruginosa (strain ATCC 15692 / DSM 22644 / CIP 104116 / JCM 14847 / LMG 12228 / 1C / PRS 101 / PAO1) OX=208964 GN=oprB PE=1 SV=1	50753.6	444513	372574	426580	397606	339312	445492	293022	176813	168511	154312	223497	250790	216553	191892	291885	43959.6	45053.4	143520	167891	309757	321405	219405	224031	131823	39033.2	223120	177767	39957.3	141642	176304	274994	77540.6	277067	43547.5	66071.3	63634.2	196099	93812.2	120413
Q51487	Q51487	oprM	Outer membrane protein OprM	Q51487	OPRM_PSEAE	>sp|Q51487|OPRM_PSEAE Outer membrane protein OprM OS=Pseudomonas aeruginosa (strain ATCC 15692 / DSM 22644 / CIP 104116 / JCM 14847 / LMG 12228 / 1C / PRS 101 / PAO1) OX=208964 GN=oprM PE=1 SV=2	52598.2	620323	602698	578481	599693	592054	2361360	2.2573e+06	2.77493e+06	3.09564e+06	511430	466897	1.98147e+06	515823	2.00955e+06	2.70632e+06	2.40199e+06	457665	2.7815e+06	1.04588e+06	492475	2405149	498875	408472	2.58499e+06	1.61531e+06	503383	1.47131e+06	579150	599775	540354	440878	840846	533267	2.97298e+06	728206	294336	473957	470495	772857
Q51506	Q51506	soxR	Redox-sensitive transcriptional activator SoxR	Q51506	SOXR_PSEAE	>sp|Q51506|SOXR_PSEAE Redox-sensitive transcriptional activator SoxR OS=Pseudomonas aeruginosa (strain ATCC 15692 / DSM 22644 / CIP 104116 / JCM 14847 / LMG 12228 / 1C / PRS 101 / PAO1) OX=208964 GN=soxR PE=3 SV=1	16998.4	31217.4	33624.5	30945.2	32181.2	30553.9	28404	27120	27045.2	34862.9	39031.3	22395.7	37808.3	30618	32307.7	19638.7	23022.6	51712.8	14386.8	22446.4	33063.1	25599.6	23656.6	35043.2	28646	25763.4	37576.2	30064.1	29081.6	30736.8	25130.2	20156	17177.3	32401.8	22514.4	3323.2	27498.2	28373.8	30744.2	22990.3
Q51507	Q51507	pchB	Isochorismate pyruvate lyase	Q51507	PCHB_PSEAE	>sp|Q51507|PCHB_PSEAE Isochorismate pyruvate lyase OS=Pseudomonas aeruginosa (strain ATCC 15692 / DSM 22644 / CIP 104116 / JCM 14847 / LMG 12228 / 1C / PRS 101 / PAO1) OX=208964 GN=pchB PE=1 SV=2	11432.1	115630	115605	119207	121144	132305	278741	19873.5	2367.66	54814.3	44738.9	415942	39801	101065	77119.2	500960	1112.06	158464	22403.6	372692	98893.3	42221.7	100131	194402	41198.9	192184	129287	3600.71	18.6701	173718	4370.46	628483	67041.2	195598	28584.1	461.378	223066	54941.1	245140	262794
Q51508	Q51508	pchA	Salicylate biosynthesis isochorismate synthase	Q51508	PCHA_PSEAE	>sp|Q51508|PCHA_PSEAE Salicylate biosynthesis isochorismate synthase OS=Pseudomonas aeruginosa (strain ATCC 15692 / DSM 22644 / CIP 104116 / JCM 14847 / LMG 12228 / 1C / PRS 101 / PAO1) OX=208964 GN=pchA PE=1 SV=1	52071.3	162464	224089	205364	220974	195699	468432	15180.9	7265.95	38949.4	19067.5	83611.4	15104.9	18093.7	29194.9	434733	18601.6	93417	29763.4	62603.4	43916	24582.3	48016.3	141907	24245.8	200473	253954	15292.3	6404.48	73285.2	18364	414300	37121.2	99817.6	29578.1	23944.5	116781	34026.3	111199	164081
Q51546	Q51546	pstB	Phosphate import ATP-binding protein PstB	Q51546	PSTB_PSEAE	>sp|Q51546|PSTB_PSEAE Phosphate import ATP-binding protein PstB OS=Pseudomonas aeruginosa (strain ATCC 15692 / DSM 22644 / CIP 104116 / JCM 14847 / LMG 12228 / 1C / PRS 101 / PAO1) OX=208964 GN=pstB PE=3 SV=1	31044.6	225657	222506	229476	217762	234662	327961	161442	80671.3	150102	131890	149258	204994	218752	227294	451083	71968	45537.9	227339	264883	97889.7	230128	200886	51651.6	87890.2	111150	91230.4	74388	62902	101128	85499.4	80169.8	50510.6	156275	90121.8	125539	105728	116233	64221.9	75338.7
Q51547	Q51547	phoU	Phosphate-specific transport system accessory protein PhoU homolog	Q51547	PHOU_PSEAE	>sp|Q51547|PHOU_PSEAE Phosphate-specific transport system accessory protein PhoU homolog OS=Pseudomonas aeruginosa (strain ATCC 15692 / DSM 22644 / CIP 104116 / JCM 14847 / LMG 12228 / 1C / PRS 101 / PAO1) OX=208964 GN=phoU PE=1 SV=1	27487.2	211068	215964	196505	238565	213516	271458	173181	123607	177702	184762	182585	264460	244802	269667	375888	77007.1	121083	227202	260977	185349	212886	197819	70437.7	98914.4	101179	99897.9	95153.3	91835.5	160251	124220	88518.1	82417.6	177509	100705	146203	136816	165099	91459.6	88813.9
Q51548	Q51548	pvdA	L-ornithine N(5)-monooxygenase	Q51548	PVDA_PSEAE	>sp|Q51548|PVDA_PSEAE L-ornithine N(5)-monooxygenase OS=Pseudomonas aeruginosa (strain ATCC 15692 / DSM 22644 / CIP 104116 / JCM 14847 / LMG 12228 / 1C / PRS 101 / PAO1) OX=208964 GN=pvdA PE=1 SV=2	49477.9	24711.2	50612.8	52172.7	51995.2	47502.4	3464.16	69245	77658	54545.1	21861	18602.7	27548.4	19692.2	25200.2	5957.24	54405.5	7606.47	55780.4	22436.8	52918.7	9450.11	20016.1	50288.1	44369.8	24676	242650	107355	22467.5	94774.8	50907.4	165172	71323.3	18400.4	126667	8596.83	4074.94	17974.1	275547	5235.06
Q51551	Q51551	pyrC'	Dihydroorotase-like protein	Q51551	PYRX_PSEAE	>sp|Q51551|PYRX_PSEAE Dihydroorotase-like protein OS=Pseudomonas aeruginosa (strain ATCC 15692 / DSM 22644 / CIP 104116 / JCM 14847 / LMG 12228 / 1C / PRS 101 / PAO1) OX=208964 GN=pyrC' PE=3 SV=2	44150.2	232863	288559	264261	330431	283521	289633	227674	244035	228907	219926	195279	218084	180090	162741	299001	229217	192841	260030	216542	64030.7	317947	186048	236382	237618	278073	274479	252122	164517	178864	219323	265023	223912	196043	264396	228432	159398	213152	264691	230363
Q51559	Q51559	rhlA	3-(3-hydroxydecanoyloxy)decanoate synthase	Q51559	RHLA_PSEAE	>sp|Q51559|RHLA_PSEAE 3-(3-hydroxydecanoyloxy)decanoate synthase OS=Pseudomonas aeruginosa (strain ATCC 15692 / DSM 22644 / CIP 104116 / JCM 14847 / LMG 12228 / 1C / PRS 101 / PAO1) OX=208964 GN=rhlA PE=1 SV=2	32962.6	12646.7	18663.5	16290.9	17543.8	18376.8	19334.3	51194.2	88134.3	113656	43603.3	8412.96	22807.2	18183.5	21848.3	12352.2	3883.74	51652.4	2150.4	3469.36	14927.4	9154.74	3354.27	62137	32583	11760	32498.2	48681.6	38528.7	74010.1	60204.4	21396.4	78537.7	48130.3	4100.49	6025.16	8065.75	69040.8	28779.4	55586.8
Q51561	Q51561	rpoB	DNA-directed RNA polymerase subunit beta	Q51561	RPOB_PSEAE	>sp|Q51561|RPOB_PSEAE DNA-directed RNA polymerase subunit beta OS=Pseudomonas aeruginosa (strain ATCC 15692 / DSM 22644 / CIP 104116 / JCM 14847 / LMG 12228 / 1C / PRS 101 / PAO1) OX=208964 GN=rpoB PE=1 SV=2	150838	2762629	2.95425e+06	2.81446e+06	2.84874e+06	2858113	3.02683e+06	2.6394e+06	2.38048e+06	2908281	2.18294e+06	2370678	2.70382e+06	2.12541e+06	2.61688e+06	3.27233e+06	2.90691e+06	2.64502e+06	2.29174e+06	2.84818e+06	2187519	2.39514e+06	2472334	2412856	2566735	2796187	2828182	2.70274e+06	2883255	2630370	2.75657e+06	2751163	2.49601e+06	2.53345e+06	3.04668e+06	4.09357e+06	3.49556e+06	2.54666e+06	2.82146e+06	2.382e+06
Q51564	Q51564	dapF	Diaminopimelate epimerase	Q51564	DAPF_PSEAE	>sp|Q51564|DAPF_PSEAE Diaminopimelate epimerase OS=Pseudomonas aeruginosa (strain ATCC 15692 / DSM 22644 / CIP 104116 / JCM 14847 / LMG 12228 / 1C / PRS 101 / PAO1) OX=208964 GN=dapF PE=3 SV=2	30319.8	279439	369969	303769	315841	320703	264563	192094	187268	192519	163948	169163	173763	166119	190389	196419	193274	174012	162314	180408	170911	177465	183585	187327	229111	148684	231906	188294	144378	186080	167187	202569	195527	199559	188710	230011	175949	172674	131046	188142
Q51566	Q51566	xerC	Tyrosine recombinase XerC	Q51566	XERC_PSEAE	>sp|Q51566|XERC_PSEAE Tyrosine recombinase XerC OS=Pseudomonas aeruginosa (strain ATCC 15692 / DSM 22644 / CIP 104116 / JCM 14847 / LMG 12228 / 1C / PRS 101 / PAO1) OX=208964 GN=xerC PE=3 SV=2	33929.6	22961.3	22449.7	23953.8	23882.4	27849.4	43645.3	29579.1	24170.8	36413.7	25392.8	11174.3	30415.2	28451.8	26962.1	25709.6	18204.4	21499.6	13097.2	15360.1	10445.3	17650.4	15789.8	28252.7	22275.6	25282.7	30798.1	33212.2	10772.3	29658.1	33135.7	30419.4	21430.5	19863.6	28479	28476	15201	32933.7	22323.9	19723.8
Q51567	Q51567	sucD	Succinate--CoA ligase [ADP-forming] subunit alpha	Q51567	SUCD_PSEAE	>sp|Q51567|SUCD_PSEAE Succinate--CoA ligase [ADP-forming] subunit alpha OS=Pseudomonas aeruginosa (strain ATCC 15692 / DSM 22644 / CIP 104116 / JCM 14847 / LMG 12228 / 1C / PRS 101 / PAO1) OX=208964 GN=sucD PE=1 SV=2	30266	3.04264e+06	3.57719e+06	3.691e+06	3.66582e+06	3.2922e+06	4.07176e+06	4.70711e+06	4353825	4.60002e+06	3722730	3.40894e+06	4028522	3.76572e+06	4.23696e+06	4.64917e+06	5338029	4.6138e+06	6570694	4.0395e+06	2.2691e+06	5626049	4865135	4.50432e+06	4086273	4805020	5.06259e+06	5.95786e+06	4224552	5837739	4.68945e+06	5.50377e+06	4983766	4784265	5.80825e+06	9885826	5671711	4731939	3558108	5108429
Q51575	Q51575	xcpP	Type II secretion system protein N	Q51575	GSPN_PSEAE	>sp|Q51575|GSPN_PSEAE Type II secretion system protein N OS=Pseudomonas aeruginosa (strain ATCC 15692 / DSM 22644 / CIP 104116 / JCM 14847 / LMG 12228 / 1C / PRS 101 / PAO1) OX=208964 GN=xcpP PE=1 SV=1	25496.6	6431.42	9277.45	5442.09	7887.84	7149.03	24777.8	70510	53405.2	50853.3	33861.3	42898.3	50470.9	45928.2	40095.7	22691.6	33377.7	15576.9	24920.9	17870.4	35486.5	57787	10394.8	39665.5	55521.9	14087.2	24833.7	85852.7	79168.1	88831.9	79377.8	26602.8	85944	76199.4	19523.7	25799	56649.9	72852	27221.3	59870.4
Q51576	Q51576	PA3106	Uncharacterized oxidoreductase PA3106	Q51576	Y3106_PSEAE	>sp|Q51576|Y3106_PSEAE Uncharacterized oxidoreductase PA3106 OS=Pseudomonas aeruginosa (strain ATCC 15692 / DSM 22644 / CIP 104116 / JCM 14847 / LMG 12228 / 1C / PRS 101 / PAO1) OX=208964 GN=PA3106 PE=3 SV=1	27029.7	41429.6	41798.2	38248.3	40504.3	40044.1	32697.8	41202.4	35662.2	38860.8	44589.4	46461.4	50891.4	47237.6	52372.7	22036	71328.2	42530.2	44391.6	34004.4	44699	50474.5	40038.1	42144.6	37707.3	45417.6	41725.3	39712.6	33884.2	38984.5	40981	40451.2	49588.5	48574	41336.1	46141.1	48101.7	45918.7	36826.4	44639.3
Q52463	Q52463	alg8	Mannuronan synthase	Q52463	ALG8_PSEAE	>sp|Q52463|ALG8_PSEAE Mannuronan synthase OS=Pseudomonas aeruginosa (strain ATCC 15692 / DSM 22644 / CIP 104116 / JCM 14847 / LMG 12228 / 1C / PRS 101 / PAO1) OX=208964 GN=alg8 PE=1 SV=2	56456.2	138776	105405	108172	100959	88610.8	145726	128312	94055.1	101547	117901	115378	118308	184514	396073	1294028	146941	124885	126128	183499	50521.4	112574	116217	124787	94636.2	263181	141395	244236	160097	571409	398666	123463	107251	111649	172431	1.58508e+06	136069	116507	133060	102947
Q59635	Q59635	katB	Catalase	Q59635	CATB_PSEAE	>sp|Q59635|CATB_PSEAE Catalase OS=Pseudomonas aeruginosa (strain ATCC 15692 / DSM 22644 / CIP 104116 / JCM 14847 / LMG 12228 / 1C / PRS 101 / PAO1) OX=208964 GN=katB PE=3 SV=1	57131.1	21667.9	19231	18093.5	20380.1	22526	42944.4	71378.8	12697	25883.3	22194.1	89068.6	85334.6	39679.8	66519.1	23109.2	60016.9	35779.4	13028.7	51367.5	35200.8	33669.4	33327.6	94491.6	79943.4	57361	84635.4	57714.8	48096.7	37668.2	36341.1	26224	24685	86766.6	41668.3	29256.9	53684.7	29733	91114.8	24688
Q59636	Q59636	ndk	Nucleoside diphosphate kinase	Q59636	NDK_PSEAE	>sp|Q59636|NDK_PSEAE Nucleoside diphosphate kinase OS=Pseudomonas aeruginosa (strain ATCC 15692 / DSM 22644 / CIP 104116 / JCM 14847 / LMG 12228 / 1C / PRS 101 / PAO1) OX=208964 GN=ndk PE=1 SV=2	15591.8	1.18296e+06	1.14487e+06	1.07779e+06	1.14545e+06	1.12411e+06	1.46002e+06	1.6894e+06	1.93136e+06	1726494	2.02235e+06	1.23703e+06	1818233	1821247	1.87801e+06	2.07055e+06	2.74498e+06	1649604	1.59644e+06	1737065	1.05843e+06	1.37416e+06	1.57481e+06	1.63588e+06	1654281	1.70663e+06	1.79612e+06	2.03257e+06	2.39268e+06	2.38345e+06	2.26575e+06	2.16562e+06	2.30257e+06	1.7099e+06	2.38291e+06	3267859	1.90223e+06	2.11176e+06	1.73994e+06	1.59908e+06
Q59637	Q59637	aceE	Pyruvate dehydrogenase E1 component	Q59637	ODP1_PSEAE	>sp|Q59637|ODP1_PSEAE Pyruvate dehydrogenase E1 component OS=Pseudomonas aeruginosa (strain ATCC 15692 / DSM 22644 / CIP 104116 / JCM 14847 / LMG 12228 / 1C / PRS 101 / PAO1) OX=208964 GN=aceE PE=3 SV=2	99564	2.60115e+06	2.75708e+06	2.70408e+06	2.82914e+06	2.6704e+06	2.61416e+06	2311596	1938386	2.1865e+06	1971890	1.8671e+06	2.1432e+06	1.72638e+06	2.0715e+06	3.41995e+06	2.80577e+06	2689824	1.83951e+06	2.5695e+06	1.55016e+06	1.61184e+06	2140160	2238525	2137296	2.85394e+06	2.72163e+06	2521622	2672412	2.34656e+06	1864868	2.43383e+06	2.62474e+06	2072150	3205593	4.22261e+06	2.61738e+06	2.50509e+06	2.61132e+06	2.18824e+06
Q59638	Q59638	aceF	Dihydrolipoyllysine-residue acetyltransferase component of pyruvate dehydrogenase complex	Q59638	ODP2_PSEAE	>sp|Q59638|ODP2_PSEAE Dihydrolipoyllysine-residue acetyltransferase component of pyruvate dehydrogenase complex OS=Pseudomonas aeruginosa (strain ATCC 15692 / DSM 22644 / CIP 104116 / JCM 14847 / LMG 12228 / 1C / PRS 101 / PAO1) OX=208964 GN=aceF PE=2 SV=2	56709.1	1.91657e+06	1.88047e+06	1.79126e+06	1.88605e+06	1.91163e+06	1.85064e+06	1.7648e+06	1643075	1.83733e+06	1.56192e+06	1631846	1.49533e+06	1.49696e+06	1.42275e+06	2352202	2.35373e+06	1.81037e+06	1.59182e+06	1.73132e+06	1.72982e+06	1.57525e+06	1.5601e+06	1.70099e+06	1.72616e+06	2.14813e+06	1.89063e+06	2.11126e+06	1.89184e+06	1.90764e+06	1.52368e+06	1.8323e+06	1.77656e+06	1.61794e+06	2.1665e+06	3350661	1.91062e+06	1.89122e+06	1.95983e+06	1.76334e+06
Q59640	Q59640	cdsA	Phosphatidate cytidylyltransferase	Q59640	CDSA_PSEAE	>sp|Q59640|CDSA_PSEAE Phosphatidate cytidylyltransferase OS=Pseudomonas aeruginosa (strain ATCC 15692 / DSM 22644 / CIP 104116 / JCM 14847 / LMG 12228 / 1C / PRS 101 / PAO1) OX=208964 GN=cdsA PE=3 SV=2	28856.5	16692.8	8998.28	16284.6	13583.8	15448.6	5096.35	6996.07	10655.6	9635.09	7573.86	5697.28	5165.12	8013.37	9647.8	7199.12	9013.88	18890.1	67.0781	17526.6	8081.87	8540.02	13788.6	5895.44	12315	1838.69	7609.91	2974.55	9472.8	3448.71	12528	14613.4	5114.4	3905.86	18673.5	11282.4	18459.7	12350.8	17758.3	10800.2
Q59641	Q59641	ppiA	Peptidyl-prolyl cis-trans isomerase A	Q59641	PPIA_PSEAE	>sp|Q59641|PPIA_PSEAE Peptidyl-prolyl cis-trans isomerase A OS=Pseudomonas aeruginosa (strain ATCC 15692 / DSM 22644 / CIP 104116 / JCM 14847 / LMG 12228 / 1C / PRS 101 / PAO1) OX=208964 GN=ppiA PE=3 SV=2	20104.2	60804.2	52482.4	46835.3	51519.8	51028.6	53908.5	79404	173740	185392	155375	123257	125522	176370	138628	62265	166272	89355.5	279709	133307	180879	149921	22461.5	59113.3	95593.1	81344.2	51915.9	124456	209920	159421	146416	96220	218499	134625	53358.1	259636	82698.6	76852.2	92386.2	57455.8
Q59643	Q59643	hemB	Delta-aminolevulinic acid dehydratase	Q59643	HEM2_PSEAE	>sp|Q59643|HEM2_PSEAE Delta-aminolevulinic acid dehydratase OS=Pseudomonas aeruginosa (strain ATCC 15692 / DSM 22644 / CIP 104116 / JCM 14847 / LMG 12228 / 1C / PRS 101 / PAO1) OX=208964 GN=hemB PE=1 SV=1	37037	693682	716193	666026	701129	689512	717389	537269	737545	817478	654400	461221	589444	566431	517547	463462	595967	573180	541388	416154	378000	756197	457735	803664	601188	635240	773554	622198	528347	866563	725268	687864	906136	501909	577718	246269	367376	755542	621578	858310
Q59646	Q59646	norC	Nitric oxide reductase subunit C	Q59646	NORC_PSEAE	>sp|Q59646|NORC_PSEAE Nitric oxide reductase subunit C OS=Pseudomonas aeruginosa (strain ATCC 15692 / DSM 22644 / CIP 104116 / JCM 14847 / LMG 12228 / 1C / PRS 101 / PAO1) OX=208964 GN=norC PE=1 SV=3	16343.6	9922.51	12864.5	12426.5	14497.6	16779.1	11296.6	11609	12530.6	13407	17996.2	2651.78	8080.98	7162.54	14306.6	30528.8	28102.2	4278.34	20.7277	6586.32	937.003	1693.56	6253.45	7227.18	3909.28	9436.77	11997.6	21633.8	23067.1	11744.2	23809.7	12746.2	30140.8	5251.67	24335.4	9041.73	8367.99	16360.9	19407.2	19899.8
Q59647	Q59647	norB	Nitric oxide reductase subunit B	Q59647	NORB_PSEAE	>sp|Q59647|NORB_PSEAE Nitric oxide reductase subunit B OS=Pseudomonas aeruginosa (strain ATCC 15692 / DSM 22644 / CIP 104116 / JCM 14847 / LMG 12228 / 1C / PRS 101 / PAO1) OX=208964 GN=norB PE=1 SV=1	52336.4	13957.1	24008.7	22613.1	21919.8	23183.5	22239.2	17277.4	15939.1	18437.5	27616.2	12509	11757.1	11065.6	21608	27263.7	18926.7	8018.75	2012.55	25632.1	9931.26	11420.4	7465.88	15591.6	2097.01	9479.65	11028.4	13533.6	39987.1	12267.2	27846.4	12604.8	34114.1	5931.09	33129.4	12473.6	5354.77	18573.6	22371.1	21355.3
Q59649	Q59649	trpF	N-(5'-phosphoribosyl)anthranilate isomerase	Q59649	TRPF_PSEAE	>sp|Q59649|TRPF_PSEAE N-(5'-phosphoribosyl)anthranilate isomerase OS=Pseudomonas aeruginosa (strain ATCC 15692 / DSM 22644 / CIP 104116 / JCM 14847 / LMG 12228 / 1C / PRS 101 / PAO1) OX=208964 GN=trpF PE=3 SV=1	22298.6	9867.92	19978.8	13392.6	11824.2	19114.8	21115.1	35782.4	39287.7	35044.8	5110.13	3936.75	28776.9	20816.8	25474.9	18338.4	26494.1	21809.2	60702.6	26592.9	3377.37	37148.2	1945.92	26547.5	24427.9	24804.8	41419.9	32142.1	3271.44	6284.14	70579	17877.8	44633.2	34116.1	21637.5	46004.8	31094.9	40258	10637.9	20099.2
Q59650	Q59650	murE	UDP-N-acetylmuramoyl-L-alanyl-D-glutamate--2,6-diaminopimelate ligase	Q59650	MURE_PSEAE	>sp|Q59650|MURE_PSEAE UDP-N-acetylmuramoyl-L-alanyl-D-glutamate--2,6-diaminopimelate ligase OS=Pseudomonas aeruginosa (strain ATCC 15692 / DSM 22644 / CIP 104116 / JCM 14847 / LMG 12228 / 1C / PRS 101 / PAO1) OX=208964 GN=murE PE=3 SV=2	51263.3	81522.7	76578.8	80299.4	70063.6	79977.2	88376.5	184208	180467	170543	192957	121096	151775	206760	195717	93379.8	137401	155154	167382	126129	173481	105874	160785	157024	173423	133199	111662	190349	136672	210635	197065	122721	179853	168967	100654	217343	166989	199226	123393	159118
Q59653	Q59653	pyrB	Aspartate carbamoyltransferase catalytic subunit	Q59653	PYRB_PSEAE	>sp|Q59653|PYRB_PSEAE Aspartate carbamoyltransferase catalytic subunit OS=Pseudomonas aeruginosa (strain ATCC 15692 / DSM 22644 / CIP 104116 / JCM 14847 / LMG 12228 / 1C / PRS 101 / PAO1) OX=208964 GN=pyrB PE=3 SV=2	36629.1	299750	329577	316235	320848	312805	312619	216361	220511	257064	231650	266096	244467	219475	232831	353768	270167	260781	285954	257192	109763	322265	292267	216670	234499	347362	326766	246345	240365	227908	224807	278910	271133	223377	284744	231928	177514	228991	299692	230714
Q59654	Q59654	pyrF	Orotidine 5'-phosphate decarboxylase	Q59654	PYRF_PSEAE	>sp|Q59654|PYRF_PSEAE Orotidine 5'-phosphate decarboxylase OS=Pseudomonas aeruginosa (strain ATCC 15692 / DSM 22644 / CIP 104116 / JCM 14847 / LMG 12228 / 1C / PRS 101 / PAO1) OX=208964 GN=pyrF PE=1 SV=2	24394.4	36877.8	31727.2	32081	35826	34987.3	29667.5	35835	50767.5	42739.8	58426.1	49490.1	39226.7	53032.5	45381.8	45068.4	79264	40228.5	41570.7	46774.4	38861.7	47045.8	41866.1	38541.4	51693.1	39949.2	39022	49908.1	43615.2	48632.1	54268.4	50589.8	53392.2	33433.1	57623.9	61181.3	32124.1	41574.9	38123.7	37814.4
Q60169	Q60169	hemC	Porphobilinogen deaminase	Q60169	HEM3_PSEAE	>sp|Q60169|HEM3_PSEAE Porphobilinogen deaminase OS=Pseudomonas aeruginosa (strain ATCC 15692 / DSM 22644 / CIP 104116 / JCM 14847 / LMG 12228 / 1C / PRS 101 / PAO1) OX=208964 GN=hemC PE=3 SV=2	33641.4	87303.4	83525.6	81222.5	95810.1	124512	109801	124900	125432	109365	183860	94636.5	199595	170946	207444	129832	190290	159201	89264.2	79004	47414.5	119874	90740.9	73022.8	140537	111250	121850	136092	61030.1	197811	172615	143807	210394	124636	109761	110127	132430	140280	135105	117638
Q7DC81	Q7DC81	phzE1	anthranilate synthase	Q7DC81	Q7DC81_PSEAE	>tr|Q7DC81|Q7DC81_PSEAE anthranilate synthase OS=Pseudomonas aeruginosa (strain ATCC 15692 / DSM 22644 / CIP 104116 / JCM 14847 / LMG 12228 / 1C / PRS 101 / PAO1) OX=208964 GN=phzE1 PE=4 SV=1	68979.7	125462	152322	152575	148958	167911	722586	1.0534e+06	307468	253545	153281	7977.73	70706.7	175270	88660.9	38454	37264.5	809736	5964.91	22454.2	179882	11561.4	28341.5	1.62335e+06	1.33613e+06	352228	1.05701e+06	963870	752623	292279	453429	749543	214624	709927	23907.7	90118	815923	189172	677048	172122
Q7DC82	Q7DC82	phzC1	Phospho-2-dehydro-3-deoxyheptonate aldolase	Q7DC82	Q7DC82_PSEAE	>tr|Q7DC82|Q7DC82_PSEAE Phospho-2-dehydro-3-deoxyheptonate aldolase OS=Pseudomonas aeruginosa (strain ATCC 15692 / DSM 22644 / CIP 104116 / JCM 14847 / LMG 12228 / 1C / PRS 101 / PAO1) OX=208964 GN=phzC1 PE=3 SV=1	44327.6	336187	328055	346822	323523	345932	1.10665e+06	417696	120434	114333	92225.7	22147.7	26665	77922.8	35218.3	40476.4	26690.2	555955	27363.3	35153.9	111614	32252	56194.5	2.33649e+06	1.58445e+06	225738	1.22489e+06	432595	709131	113544	219741	978469	63542.7	309272	31057.6	85114.6	442543	67941.9	736270	58027
Q9HI36	Q9HI36	hcpA	Major exported protein	Q9HI36	MAJE_PSEAE	>sp|Q9HI36|MAJE_PSEAE Major exported protein OS=Pseudomonas aeruginosa (strain ATCC 15692 / DSM 22644 / CIP 104116 / JCM 14847 / LMG 12228 / 1C / PRS 101 / PAO1) OX=208964 GN=hcpA PE=1 SV=1	19091.2	37413.6	53421	56384.8	64664.8	58999.1	119444	103571	8606.6	9270.63	32253.3	11828.1	30829	25830.6	155556	28878	41872.6	28549.4	31644.1	9011.49	7292.1	33349.1	33318.1	27541.1	54819	4103.5	48686.5	103056	12486.1	10856.4	45131.6	43199.5	11995.4	32068.1	19128.1	11799	12778.8	6113.46	37083.2	11074.9
Q9HT05	Q9HT05	rnpA	Ribonuclease P protein component	Q9HT05	RNPA_PSEAE	>sp|Q9HT05|RNPA_PSEAE Ribonuclease P protein component OS=Pseudomonas aeruginosa (strain ATCC 15692 / DSM 22644 / CIP 104116 / JCM 14847 / LMG 12228 / 1C / PRS 101 / PAO1) OX=208964 GN=rnpA PE=3 SV=1	15313.7	32822.9	34561.2	32191.9	33037.7	34229.6	33330.6	35962.4	39853.7	36347.1	31775.6	27475.5	32867.9	30653.4	39085	39046.4	48214.2	33551	31749.8	37313	41113.8	31155.6	25802.8	39060.6	30075.2	36524.4	38877.7	39417.2	43206.4	42986.1	40887.4	37199.9	44316.8	38954.4	48913.4	68168	51792.2	38715.1	25830	41371.7
Q9HT06	Q9HT06	yidC	Membrane protein insertase YidC	Q9HT06	YIDC_PSEAE	>sp|Q9HT06|YIDC_PSEAE Membrane protein insertase YidC OS=Pseudomonas aeruginosa (strain ATCC 15692 / DSM 22644 / CIP 104116 / JCM 14847 / LMG 12228 / 1C / PRS 101 / PAO1) OX=208964 GN=yidC PE=3 SV=1	64074.8	236181	223201	217819	249875	254593	205075	146045	110294	143568	123262	121027	155299	139545	161314	276079	170704	117227	87785	222956	87823.9	170190	121534	114866	111209	174497	137957	157943	178362	118983	155955	171827	123667	113465	242405	221554	193058	124901	258210	151950
Q9HT07	Q9HT07	mnmE	tRNA modification GTPase MnmE	Q9HT07	MNME_PSEAE	>sp|Q9HT07|MNME_PSEAE tRNA modification GTPase MnmE OS=Pseudomonas aeruginosa (strain ATCC 15692 / DSM 22644 / CIP 104116 / JCM 14847 / LMG 12228 / 1C / PRS 101 / PAO1) OX=208964 GN=mnmE PE=3 SV=1	48744.1	49100.2	50267.9	42051.4	49456.2	54108.7	58369.2	54359.8	71881.4	61178.9	65427.5	40987.9	57326.3	42779.5	43241	46151.1	43033.6	74952.4	40580.8	61621.4	51081.7	60729.9	68182.6	66226.4	41521.2	50686.7	60890.9	62006.4	48422.7	66702	75769.6	66380.1	57495.4	69105.4	63794.2	98030.9	87828.2	72272.6	66506.6	55445.8
Q9HT09	Q9HT09	mnmG	tRNA uridine 5-carboxymethylaminomethyl modification enzyme MnmG	Q9HT09	MNMG_PSEAE	>sp|Q9HT09|MNMG_PSEAE tRNA uridine 5-carboxymethylaminomethyl modification enzyme MnmG OS=Pseudomonas aeruginosa (strain ATCC 15692 / DSM 22644 / CIP 104116 / JCM 14847 / LMG 12228 / 1C / PRS 101 / PAO1) OX=208964 GN=mnmG PE=3 SV=1	69637.9	56506.9	57887.3	53790.8	58170	54767	68805	54084.4	62058.3	61284.9	42898.4	50438.8	50525.8	32660.3	53325.5	65516	77232.1	37461.8	32155.3	57113.5	29804.2	29343.5	52625.6	54260.8	63929.8	84953.1	67052.1	54633	61333.9	64077	75007.5	72197.8	52373.1	63176.4	66216.4	122068	93540.1	66569.2	49551.8	55490.4
Q9HT10	Q9HT10	rsmG	Ribosomal RNA small subunit methyltransferase G	Q9HT10	RSMG_PSEAE	>sp|Q9HT10|RSMG_PSEAE Ribosomal RNA small subunit methyltransferase G OS=Pseudomonas aeruginosa (strain ATCC 15692 / DSM 22644 / CIP 104116 / JCM 14847 / LMG 12228 / 1C / PRS 101 / PAO1) OX=208964 GN=rsmG PE=3 SV=1	23735.1	40268.3	52471.7	43254.5	44128.6	50660.3	46401	68982.4	59967.7	62431.9	59616.3	27501.6	49415.5	49441.6	51453.8	53708.7	74457	27562.2	60835.1	27445.4	33759.6	52015	38964	43368.3	65215	64320.5	41059.7	57970.3	55180.1	68797.7	73855	55604	53966.2	51984.1	50674	69362.1	78370.3	52541.6	29431	52822.4
Q9HT11	Q9HT11	soj	Chromosome partitioning protein Soj	Q9HT11	Q9HT11_PSEAE	>tr|Q9HT11|Q9HT11_PSEAE Chromosome partitioning protein Soj OS=Pseudomonas aeruginosa (strain ATCC 15692 / DSM 22644 / CIP 104116 / JCM 14847 / LMG 12228 / 1C / PRS 101 / PAO1) OX=208964 GN=soj PE=4 SV=1	28608.9	142755	158970	146633	140901	141793	129954	83342.8	74098.8	101305	87390.4	119166	98096.8	91930.7	94344.5	116165	112842	91922.9	112329	97286.2	99803.8	81666.2	113379	100866	110155	136395	136114	97500.6	86651	96256.8	100611	95234.6	94326.5	96669.4	88669.4	167464	97686.4	91182	84260.3	86365.6
Q9HT12	Q9HT12	spoOJ	Probable chromosome-partitioning protein ParB	Q9HT12	Q9HT12_PSEAE	>tr|Q9HT12|Q9HT12_PSEAE Probable chromosome-partitioning protein ParB OS=Pseudomonas aeruginosa (strain ATCC 15692 / DSM 22644 / CIP 104116 / JCM 14847 / LMG 12228 / 1C / PRS 101 / PAO1) OX=208964 GN=spoOJ PE=1 SV=1	31968.8	373850	367295	349278	360834	351887	333261	322181	285850	330561	325363	329582	347658	361737	390774	385193	415624	380937	314402	359863	298437	183956	428097	322026	436344	343039	347441	351761	335221	319458	365326	368782	334878	346669	363548	779808	468986	326364	342460	346774
Q9HT14	Q9HT14	atpB	ATP synthase subunit a	Q9HT14	ATP6_PSEAE	>sp|Q9HT14|ATP6_PSEAE ATP synthase subunit a OS=Pseudomonas aeruginosa (strain ATCC 15692 / DSM 22644 / CIP 104116 / JCM 14847 / LMG 12228 / 1C / PRS 101 / PAO1) OX=208964 GN=atpB PE=3 SV=1	31920.8	51866.4	195912	155342	192279	190339	179900	178848	164594	220738	92443.1	10556	128410	47408.8	65475.8	77680.4	123786	34541.9	155898	17973	1786.31	168481	53090.2	100389	131869	132933	169665	118617	81100	172161	169738	147263	175779	143199	127671	295009	94412.6	154914	46740.8	122827
Q9HT15	Q9HT15	atpE	ATP synthase subunit c	Q9HT15	ATPL_PSEAE	>sp|Q9HT15|ATPL_PSEAE ATP synthase subunit c OS=Pseudomonas aeruginosa (strain ATCC 15692 / DSM 22644 / CIP 104116 / JCM 14847 / LMG 12228 / 1C / PRS 101 / PAO1) OX=208964 GN=atpE PE=3 SV=1	8608.45	3048134	2.68493e+06	2.88662e+06	2151738	1.51205e+06	2.90588e+06	2.38999e+06	2769852	2.92139e+06	1.3514e+06	1.20834e+06	1.86308e+06	1.21558e+06	1.66569e+06	2.10753e+06	2.19421e+06	1.2132e+06	1.77218e+06	1.56946e+06	1.42265e+06	2.3883e+06	1.27592e+06	1.32757e+06	1.83754e+06	2.09784e+06	2.2387e+06	1.32751e+06	2.31678e+06	1.62992e+06	1.81501e+06	1.62585e+06	1.91998e+06	1744449	1.8542e+06	2.27739e+06	1.69396e+06	1.19801e+06	1.32638e+06	2514342
Q9HT16	Q9HT16	atpF	ATP synthase subunit b	Q9HT16	ATPF_PSEAE	>sp|Q9HT16|ATPF_PSEAE ATP synthase subunit b OS=Pseudomonas aeruginosa (strain ATCC 15692 / DSM 22644 / CIP 104116 / JCM 14847 / LMG 12228 / 1C / PRS 101 / PAO1) OX=208964 GN=atpF PE=3 SV=1	16956.4	8.00184e+06	8453875	7.81954e+06	8.03671e+06	7.41823e+06	7822101	5.28583e+06	5.46873e+06	5535939	4.12961e+06	4.20997e+06	4.80693e+06	4366201	4871154	7.36176e+06	6.10095e+06	2991136	5.55005e+06	4.157e+06	4845963	6.4729e+06	6.01511e+06	5671095	4.80131e+06	7.07583e+06	6.69722e+06	5129149	6194052	5820203	5182345	5.7234e+06	6764339	5567329	7081953	10868026	6.30868e+06	6041582	5.97354e+06	5779521
Q9HT17	Q9HT17	atpH	ATP synthase subunit delta	Q9HT17	ATPD_PSEAE	>sp|Q9HT17|ATPD_PSEAE ATP synthase subunit delta OS=Pseudomonas aeruginosa (strain ATCC 15692 / DSM 22644 / CIP 104116 / JCM 14847 / LMG 12228 / 1C / PRS 101 / PAO1) OX=208964 GN=atpH PE=3 SV=1	19260	2.48909e+06	2.86043e+06	2.60939e+06	2.93578e+06	2.85323e+06	2.96209e+06	2.18305e+06	2.42271e+06	2.09542e+06	1.46904e+06	882165	1.63356e+06	1.33786e+06	1.47671e+06	2824936	2.22237e+06	824039	2.09745e+06	1.36076e+06	640518	1.89996e+06	1.95332e+06	1.99971e+06	1.54498e+06	2.51077e+06	2.14509e+06	1.90466e+06	2.07098e+06	2579655	2.13928e+06	2.11168e+06	2232969	1.99336e+06	2.14508e+06	3.59714e+06	2260113	2.16143e+06	1.49024e+06	2.11991e+06
Q9HT18	Q9HT18	atpA	ATP synthase subunit alpha	Q9HT18	ATPA_PSEAE	>sp|Q9HT18|ATPA_PSEAE ATP synthase subunit alpha OS=Pseudomonas aeruginosa (strain ATCC 15692 / DSM 22644 / CIP 104116 / JCM 14847 / LMG 12228 / 1C / PRS 101 / PAO1) OX=208964 GN=atpA PE=3 SV=1	55393.2	6.40483e+06	6.38025e+06	6348287	6.58739e+06	6.26415e+06	6.94452e+06	5389834	5533016	6.08156e+06	4.14225e+06	4351363	4625608	4.19069e+06	4.61504e+06	6.40901e+06	5660506	3.39164e+06	5706972	4427835	6.17319e+06	6813417	5.85239e+06	5.6355e+06	5122144	6297394	6.24644e+06	4816055	5.87321e+06	5.29631e+06	4.91656e+06	5592631	5798981	4874759	6673559	7.47778e+06	5.62665e+06	5.23112e+06	6307650	5707005
Q9HT19	Q9HT19	atpG	ATP synthase gamma chain	Q9HT19	ATPG_PSEAE	>sp|Q9HT19|ATPG_PSEAE ATP synthase gamma chain OS=Pseudomonas aeruginosa (strain ATCC 15692 / DSM 22644 / CIP 104116 / JCM 14847 / LMG 12228 / 1C / PRS 101 / PAO1) OX=208964 GN=atpG PE=3 SV=1	31553.3	914024	1.43066e+06	1.17503e+06	1.28116e+06	1.33137e+06	1.45351e+06	955366	1.05347e+06	1.39481e+06	711702	520434	1.1e+06	570664	909658	1.10063e+06	1.02466e+06	685224	594012	588578	250469	835827	727805	798137	851240	1.09819e+06	1.16259e+06	993609	849156	1.27034e+06	985032	1.11917e+06	1.06335e+06	863824	1.12639e+06	2159229	1.02346e+06	976772	843324	989841
Q9HT20	Q9HT20	atpD	ATP synthase subunit beta	Q9HT20	ATPB_PSEAE	>sp|Q9HT20|ATPB_PSEAE ATP synthase subunit beta OS=Pseudomonas aeruginosa (strain ATCC 15692 / DSM 22644 / CIP 104116 / JCM 14847 / LMG 12228 / 1C / PRS 101 / PAO1) OX=208964 GN=atpD PE=3 SV=1	49499.5	5654567	5.94169e+06	5952827	5.81878e+06	5.81673e+06	6.39737e+06	4866128	5.15773e+06	5014476	3402497	3.50213e+06	4.20697e+06	3.36129e+06	3.98886e+06	6025943	5240007	2.59519e+06	4673671	3.1273e+06	3136101	5299140	4.53568e+06	4609718	4.06142e+06	6086896	5.73203e+06	4.6587e+06	5187791	4881205	4.63138e+06	4846006	5.2469e+06	4.5819e+06	6.14113e+06	7121912	4.8583e+06	4442955	4.55897e+06	5.23418e+06
Q9HT21	Q9HT21	atpC	ATP synthase epsilon chain	Q9HT21	ATPE_PSEAE	>sp|Q9HT21|ATPE_PSEAE ATP synthase epsilon chain OS=Pseudomonas aeruginosa (strain ATCC 15692 / DSM 22644 / CIP 104116 / JCM 14847 / LMG 12228 / 1C / PRS 101 / PAO1) OX=208964 GN=atpC PE=3 SV=1	14725.9	3.6581e+06	3.54035e+06	3.34745e+06	3.476e+06	3.34182e+06	3463579	2.09848e+06	2.31257e+06	2559775	2.28744e+06	1.60302e+06	2.03381e+06	2.22993e+06	2444304	3.3759e+06	2.775e+06	1221150	2935246	1887109	2473315	2921627	2.98978e+06	2.53534e+06	2469527	3388725	3.47827e+06	2481887	2.32254e+06	2.80605e+06	2.62563e+06	2.71134e+06	3.33387e+06	2.29469e+06	3.24876e+06	3.60549e+06	2251134	2784533	2.96424e+06	2.76959e+06
Q9HT22	Q9HT22	glmU	Bifunctional protein GlmU	Q9HT22	GLMU_PSEAE	>sp|Q9HT22|GLMU_PSEAE Bifunctional protein GlmU OS=Pseudomonas aeruginosa (strain ATCC 15692 / DSM 22644 / CIP 104116 / JCM 14847 / LMG 12228 / 1C / PRS 101 / PAO1) OX=208964 GN=glmU PE=3 SV=1	48851.8	61058.5	59095.9	62167.8	64554.7	60343.4	99843.5	114086	111186	107708	67287.7	67453.4	71726.6	68320.4	77622.1	84006.2	86322	101360	73385.1	75809.2	79518.6	64088	85717.8	95547.1	29886.3	77479.3	97022.9	103834	101966	138605	120136	106684	104171	116781	117930	107698	155945	100039	94243.5	96371
Q9HT24	Q9HT24	glmR	GlmR transcriptional regulator	Q9HT24	Q9HT24_PSEAE	>tr|Q9HT24|Q9HT24_PSEAE GlmR transcriptional regulator OS=Pseudomonas aeruginosa (strain ATCC 15692 / DSM 22644 / CIP 104116 / JCM 14847 / LMG 12228 / 1C / PRS 101 / PAO1) OX=208964 GN=glmR PE=4 SV=1	28151.2	6961.23	7906.65	8118.03	5785.44	9208.64	8563.74	12171.2	10147.8	9741.66	8577.95	2740.57	10362.3	7518.16	9353.19	5852.92	9280.61	6893.75	7279.97	4308.22	3768.3	7928.11	5591.19	9026.13	20963	10593.9	11080.9	17985.2	11652.4	13294	13541.8	10458	8108.32	14161.4	10263.4	13506	9948.59	12985.8	5988.44	7665.03
Q9HT25	Q9HT25	glmS	Glutamine--fructose-6-phosphate aminotransferase [isomerizing]	Q9HT25	GLMS_PSEAE	>sp|Q9HT25|GLMS_PSEAE Glutamine--fructose-6-phosphate aminotransferase [isomerizing] OS=Pseudomonas aeruginosa (strain ATCC 15692 / DSM 22644 / CIP 104116 / JCM 14847 / LMG 12228 / 1C / PRS 101 / PAO1) OX=208964 GN=glmS PE=3 SV=3	66294.7	277090	294976	273623	293595	314806	336866	474101	436663	360530	364128	251805	335807	307918	362839	319076	393479	318121	319685	291724	412446	262379	364026	417785	528900	259144	345901	468568	498821	495853	473598	440214	275670	470039	328617	375754	407765	442437	482796	272320
Q9HT27	Q9HT27	PA5547	HAD-IB family hydrolase	Q9HT27	Q9HT27_PSEAE	>tr|Q9HT27|Q9HT27_PSEAE HAD-IB family hydrolase OS=Pseudomonas aeruginosa (strain ATCC 15692 / DSM 22644 / CIP 104116 / JCM 14847 / LMG 12228 / 1C / PRS 101 / PAO1) OX=208964 GN=PA5547 PE=4 SV=1	23744.4	12248.2	13639.7	11744.9	11655.3	13193.3	17191	8670.24	3189.14	9106.5	5194.46	6822.23	7651.94	7153.76	10686.4	6624.11	8005.78	3266.77	1614.36	8405.74	638.622	4539.82	1084.03	5579.55	5316.77	11429.2	7726.09	15481	5782.8	8751.86	14158.8	7593.02	22537.7	6605.41	8517.41	4236.82	8679.86	5502.24	5374.63	9296.19
Q9HT28	Q9HT28	PA5546	Polyketide synthase methyltransferase domain-containing protein	Q9HT28	Q9HT28_PSEAE	>tr|Q9HT28|Q9HT28_PSEAE Polyketide synthase methyltransferase domain-containing protein OS=Pseudomonas aeruginosa (strain ATCC 15692 / DSM 22644 / CIP 104116 / JCM 14847 / LMG 12228 / 1C / PRS 101 / PAO1) OX=208964 GN=PA5546 PE=3 SV=1	44096.3	87975.5	99320.7	92024.3	104032	102737	190691	240823	127763	390057	180878	110627	174468	100171	110596	61134.8	55070.8	81900.8	85266.1	66071.2	118428	193965	384840	311410	119142	83316.2	211641	291329	197599	450597	405379	243949	512958	194474	70187.5	88024.6	76937.6	169000	135325	179433
Q9HT29	Q9HT29	PA5545	C4-dicarboxylate ABC transporter	Q9HT29	Q9HT29_PSEAE	>tr|Q9HT29|Q9HT29_PSEAE C4-dicarboxylate ABC transporter OS=Pseudomonas aeruginosa (strain ATCC 15692 / DSM 22644 / CIP 104116 / JCM 14847 / LMG 12228 / 1C / PRS 101 / PAO1) OX=208964 GN=PA5545 PE=4 SV=1	33627.5	33449.2	37301.4	41336.9	33633.7	38034.4	134015	157669	183800	122450	190662	97655.6	258019	280512	146715	77386.9	49888.1	23330.4	101424	70096.9	130305	310457	138716	92509.1	97416.2	42987.2	66220	66814.2	63894.2	140879	130326	48364.4	97855.8	210438	25845.9	14451.7	14124.6	109437	48254.7	38215.2
Q9HT32	Q9HT32	PA5542	Beta-lactamase-related domain-containing protein	Q9HT32	Q9HT32_PSEAE	>tr|Q9HT32|Q9HT32_PSEAE Beta-lactamase-related domain-containing protein OS=Pseudomonas aeruginosa (strain ATCC 15692 / DSM 22644 / CIP 104116 / JCM 14847 / LMG 12228 / 1C / PRS 101 / PAO1) OX=208964 GN=PA5542 PE=1 SV=1	45872.8	13647.4	11712.5	14471.2	15911	14601.4	44446.8	71569.4	34599.9	29887.7	12936.1	13399.7	28302	33345.7	33853	17596.7	15756.2	16361.1	24223.8	50812.7	86417.1	39104.4	39033.5	65560	21132.9	12256.8	37478.6	20436	9534.75	33528.2	33016.7	36218.8	28708.1	75094.6	3476.27	13284.8	19983.5	31321.3	26030.2	15862.8
Q9HT36	Q9HT36	amiA	N-acetylmuramoyl-L-alanine amidase	Q9HT36	Q9HT36_PSEAE	>tr|Q9HT36|Q9HT36_PSEAE N-acetylmuramoyl-L-alanine amidase OS=Pseudomonas aeruginosa (strain ATCC 15692 / DSM 22644 / CIP 104116 / JCM 14847 / LMG 12228 / 1C / PRS 101 / PAO1) OX=208964 GN=amiA PE=4 SV=1	42920.4	12760.1	12994.5	15166.7	235796	16816.6	40350.3	25375.8	202453	19636.6	25481.2	7661.67	33672.1	13503.2	35979.1	323769	63672.3	55968	10735.9	27415.7	41551.1	6412.19	40525	36261.4	86149.2	49334.5	27649	28049	22212.2	18092.6	24443.8	37283.3	18625.6	18167.4	17365.8	318043	42853	19710.7	23934	24515.4
Q9HT39	Q9HT39	PA5535	CobW C-terminal domain-containing protein	Q9HT39	Q9HT39_PSEAE	>tr|Q9HT39|Q9HT39_PSEAE CobW C-terminal domain-containing protein OS=Pseudomonas aeruginosa (strain ATCC 15692 / DSM 22644 / CIP 104116 / JCM 14847 / LMG 12228 / 1C / PRS 101 / PAO1) OX=208964 GN=PA5535 PE=3 SV=1	45118.2	82583.2	6511.19	4968.08	3549.18	9367.23	8564.56	9880.69	73107.3	10235.8	11213.1	1267245	3092.19	73684.1	31693.7	8866.54	22817.1	9051.41	10687.3	19304.8	38836.9	13026.5	5748.65	272762	11143.2	4167.3	6993.27	9516.83	2580.28	8729.98	12208.1	11834.1	44844.9	7942.33	15669.9	13030.4	12677.5	32302	8062.88	47389.3
Q9HT40	Q9HT40	PA5534	DUF1826 domain-containing protein	Q9HT40	Q9HT40_PSEAE	>tr|Q9HT40|Q9HT40_PSEAE DUF1826 domain-containing protein OS=Pseudomonas aeruginosa (strain ATCC 15692 / DSM 22644 / CIP 104116 / JCM 14847 / LMG 12228 / 1C / PRS 101 / PAO1) OX=208964 GN=PA5534 PE=4 SV=1	23593	8857.82	6320.65	15859.1	13363.2	5333.36	1104.42	4696.15	6031.31	7102.93	17796.7	2815.54	10781	20095.8	15678.2	12574.4	18409	13094.3	5739.91	696.113	28.6407	13194.9	8397.87	5896.94	10310.9	4784.58	16911.8	7997.64	3786.21	10419.7	9747.2	7290.19	13487.2	7797.05	6770.72	3511	4905.85	12507.8	6787.11	2409.42
Q9HT42	Q9HT42	PA5532	CobW/HypB/UreG nucleotide-binding domain-containing protein	Q9HT42	Q9HT42_PSEAE	>tr|Q9HT42|Q9HT42_PSEAE CobW/HypB/UreG nucleotide-binding domain-containing protein OS=Pseudomonas aeruginosa (strain ATCC 15692 / DSM 22644 / CIP 104116 / JCM 14847 / LMG 12228 / 1C / PRS 101 / PAO1) OX=208964 GN=PA5532 PE=4 SV=1	26697	1336.83	10663.5	10389.4	10514.4	6972.57	8766.48	7816.92	3895.34	8017.03	2637.2	5077.88	2306.45	12954.4	3014.97	3654.22	1217.95	7079.26	85.1589	672.695	1846.25	1156.15	6590.72	10276.5	3318.27	1521.99	8544.9	9075.05	4250.01	6204.64	2064.63	1933.91	2249.54	1160	4921.15	7473.22	2661.66	10187.9	10166.1	1353.22
Q9HT43	Q9HT43	PA5530	Probable MFS dicarboxylate transporter	Q9HT43	Q9HT43_PSEAE	>tr|Q9HT43|Q9HT43_PSEAE Probable MFS dicarboxylate transporter OS=Pseudomonas aeruginosa (strain ATCC 15692 / DSM 22644 / CIP 104116 / JCM 14847 / LMG 12228 / 1C / PRS 101 / PAO1) OX=208964 GN=PA5530 PE=3 SV=1	47761.1	41343	34493.1	37243.4	37241.8	36596.4	17284.9	4983.5	7115.93	8229.49	9079.95	24543.1	13147.9	10528	16855.3	43518.5	29424.2	17598.3	3719.99	65601.1	9807.07	12174.1	10184.9	12116.4	31101.5	39497.4	20426.5	17519.8	32173	8924.96	13485.9	32765.1	13214.9	6813.83	37823.4	54030	18372.3	9136.13	27536.9	9032.82
Q9HT44	Q9HT44	PA5529	Probable sodium/proton antiporter	Q9HT44	Q9HT44_PSEAE	>tr|Q9HT44|Q9HT44_PSEAE Probable sodium/proton antiporter OS=Pseudomonas aeruginosa (strain ATCC 15692 / DSM 22644 / CIP 104116 / JCM 14847 / LMG 12228 / 1C / PRS 101 / PAO1) OX=208964 GN=PA5529 PE=3 SV=1	63623.7	13184.2	14269.3	13404.6	16662.6	15933.2	13736.4	8712.9	2863.96	6555.22	7728.52	7738.5	11801.3	6848.58	7234.39	13465.2	2809.75	23273.2	2446.21	22073.1	4999.75	345.559	8084.19	6457.24	8239.16	3569.8	4818	6606.83	8900.73	9023.24	7584.75	13389.4	14415.4	10839.7	7213.8	4676.5	3189.06	13434.7	10840.4	6548.7
Q9HT45	Q9HT45	PA5528	Tim44-like domain-containing protein	Q9HT45	Q9HT45_PSEAE	>tr|Q9HT45|Q9HT45_PSEAE Tim44-like domain-containing protein OS=Pseudomonas aeruginosa (strain ATCC 15692 / DSM 22644 / CIP 104116 / JCM 14847 / LMG 12228 / 1C / PRS 101 / PAO1) OX=208964 GN=PA5528 PE=4 SV=1	30414.5	294875	469803	447368	513468	493248	510334	400819	383568	373643	330830	189107	491761	206349	372736	610538	714999	287306	248511	344265	70073	311852	288584	379897	547276	586198	525881	424585	371127	336147	443623	612026	264086	436543	595104	88767.4	369982	358612	440639	595330
Q9HT46	Q9HT46	PA5527	Knr4/Smi1-like domain-containing protein	Q9HT46	Q9HT46_PSEAE	>tr|Q9HT46|Q9HT46_PSEAE Knr4/Smi1-like domain-containing protein OS=Pseudomonas aeruginosa (strain ATCC 15692 / DSM 22644 / CIP 104116 / JCM 14847 / LMG 12228 / 1C / PRS 101 / PAO1) OX=208964 GN=PA5527 PE=4 SV=1	15179	12952.2	3922.21	2339.18	3090.69	2483.08	330.244	8842.02	10126.8	10923.5	12498.6	7065.37	8757.69	8710.08	11149.4	4099.26	5515.54	14246.5	20087.4	7120.87	14738.8	9188.84	5275.63	446.999	3074.66	15003.9	2303.6	8523.33	261.822	16224.1	8232.19	2489.01	20222	6166.77	21513.7	5562.45	307.211	13884.7	3903.85	6586.31
Q9HT48	Q9HT48	PA5525	Probable transcriptional regulator	Q9HT48	Q9HT48_PSEAE	>tr|Q9HT48|Q9HT48_PSEAE Probable transcriptional regulator OS=Pseudomonas aeruginosa (strain ATCC 15692 / DSM 22644 / CIP 104116 / JCM 14847 / LMG 12228 / 1C / PRS 101 / PAO1) OX=208964 GN=PA5525 PE=4 SV=1	27973.8	6112.75	7873.82	8124.1	9824.4	7640	8069.01	7770.79	6766.16	3082.93	7537.12	11472.7	6818.74	10671.5	5716.86	8873.8	9353.3	9987	9317.71	3066.27	8441.92	10794.5	15594.3	11090.6	9783	3092.27	11647.7	8828.77	7971.09	3858.4	6276.67	7634.39	8264.61	7777.06	9703.15	6970.66	4110.71	8982.88	10028.9	9047.47
Q9HT49	Q9HT49	PA5524	Probable short-chain dehydrogenase	Q9HT49	Q9HT49_PSEAE	>tr|Q9HT49|Q9HT49_PSEAE Probable short-chain dehydrogenase OS=Pseudomonas aeruginosa (strain ATCC 15692 / DSM 22644 / CIP 104116 / JCM 14847 / LMG 12228 / 1C / PRS 101 / PAO1) OX=208964 GN=PA5524 PE=3 SV=1	27158.5	17129.2	22006.1	22786.3	20781.8	23681.5	13466.8	7499.3	6313.7	6168.83	9136.35	1842.67	20884.9	9396.18	14749.8	14468.5	7639.44	9992.97	4554.97	959.374	3162.4	105476	6357.51	8970.35	1783.32	8132.12	11642.8	14971.4	7444.67	15091.7	8118.12	12699.1	10372.3	6991.56	8443.49	17343.8	9793.34	13941.6	29603.1	6130.35
Q9HT50	Q9HT50	PA5523	Glutamate-1-semialdehyde 2,1-aminomutase	Q9HT50	Q9HT50_PSEAE	>tr|Q9HT50|Q9HT50_PSEAE Glutamate-1-semialdehyde 2,1-aminomutase OS=Pseudomonas aeruginosa (strain ATCC 15692 / DSM 22644 / CIP 104116 / JCM 14847 / LMG 12228 / 1C / PRS 101 / PAO1) OX=208964 GN=PA5523 PE=3 SV=1	48908.9	91503.7	106507	89913.7	87447	83656.9	57440.5	49507.7	27440.7	54206	45025.2	26570.1	57355.5	33007.2	29008.3	13121.5	37236.8	31110.4	44558.5	52084.7	25548.9	56785.3	25400	39620.3	42244	32831.9	55694.9	26719.3	27341.3	34411.5	40611.5	47973.8	26089.9	56717.9	34226.2	80080.3	38183.7	58647.8	33562.7	26971.9
Q9HT51	Q9HT51	PA5522	Probable glutamine synthetase	Q9HT51	Q9HT51_PSEAE	>tr|Q9HT51|Q9HT51_PSEAE Probable glutamine synthetase OS=Pseudomonas aeruginosa (strain ATCC 15692 / DSM 22644 / CIP 104116 / JCM 14847 / LMG 12228 / 1C / PRS 101 / PAO1) OX=208964 GN=PA5522 PE=3 SV=1	49878.6	61795.6	52022.2	52829	57167.1	51698.8	33676.7	19262.4	9945.59	18905.8	16091.7	11176.3	22303.2	12114	21535.3	15620.1	15820.9	17048.5	14727.2	15720.8	14047.5	19323.9	16264.4	22066.8	16051	17075.4	23237.8	14578.9	14913.6	16826.9	13967.1	22611.9	13011	18148.7	20623.2	42626.1	21966.7	23545.2	15790.4	15591.9
Q9HT52	Q9HT52	PA5521	Probable short-chain dehydrogenase	Q9HT52	Q9HT52_PSEAE	>tr|Q9HT52|Q9HT52_PSEAE Probable short-chain dehydrogenase OS=Pseudomonas aeruginosa (strain ATCC 15692 / DSM 22644 / CIP 104116 / JCM 14847 / LMG 12228 / 1C / PRS 101 / PAO1) OX=208964 GN=PA5521 PE=3 SV=1	26894.6	190233	191829	183013	181438	188476	146876	210735	203701	216669	252524	162623	204351	226038	182719	72275.8	138562	138567	303139	131565	209706	258846	162752	187679	135158	166737	151538	248471	154974	265422	202069	132535	210282	251903	109839	244173	147260	276406	135802	149327
Q9HT53	Q9HT53	PA5520	Tetratricopeptide repeat protein	Q9HT53	Q9HT53_PSEAE	>tr|Q9HT53|Q9HT53_PSEAE Tetratricopeptide repeat protein OS=Pseudomonas aeruginosa (strain ATCC 15692 / DSM 22644 / CIP 104116 / JCM 14847 / LMG 12228 / 1C / PRS 101 / PAO1) OX=208964 GN=PA5520 PE=4 SV=1	26250.7	20274.9	16113.3	18133.5	16397.3	21148	22130.1	36025.9	40222.7	61581	27333.4	17688.5	22464.9	29974.2	23560.4	12203.5	9337.12	35880.1	37994.3	15912.6	7779.78	32912.7	42949.1	34000.2	25669.8	13744.8	26924.4	38897.9	28465.4	55858.6	48929.9	14602.6	62036.1	55487.6	7571.84	13091.7	17693.7	41104.2	15504.5	26638
Q9HT54	Q9HT54	PA5519	HotDog ACOT-type domain-containing protein	Q9HT54	Q9HT54_PSEAE	>tr|Q9HT54|Q9HT54_PSEAE HotDog ACOT-type domain-containing protein OS=Pseudomonas aeruginosa (strain ATCC 15692 / DSM 22644 / CIP 104116 / JCM 14847 / LMG 12228 / 1C / PRS 101 / PAO1) OX=208964 GN=PA5519 PE=3 SV=1	21215.2	21880.2	29590.7	30484.6	27608.1	28368	51963.1	55171.7	44822.6	58154.7	67692.3	58125	58436.1	71366	58175.3	50238.3	60614.9	44296.3	91562.6	59274.2	60384	77482.6	49862.8	42602.1	44725.8	59988.1	8457.09	74306.3	43780.7	67592.7	73539.4	56094.1	57704.1	58885.8	55820.6	18357.8	64659.8	52708.3	55323.1	58875.2
Q9HT55	Q9HT55	PA5518	Probable potassium efflux transporter	Q9HT55	Q9HT55_PSEAE	>tr|Q9HT55|Q9HT55_PSEAE Probable potassium efflux transporter OS=Pseudomonas aeruginosa (strain ATCC 15692 / DSM 22644 / CIP 104116 / JCM 14847 / LMG 12228 / 1C / PRS 101 / PAO1) OX=208964 GN=PA5518 PE=3 SV=1	59794.5	10244.7	15377.8	11712.3	9245.4	11329.1	21947.6	5707.24	6886.12	10269.9	2594.21	6638.19	4709.31	7302.98	8953.61	8320.8	6590.2	6143.52	2788.52	8152.6	5472.81	80.0519	6679.48	7808.11	7075.18	10977.3	12236.7	2814.88	8554.72	2962.09	12089.7	13212.2	17196.7	5647.19	15875.8	23476.8	3814	3223.18	10096.2	3261.36
Q9HT57	Q9HT57	pdxY	Pyridoxal kinase PdxY	Q9HT57	PDXY_PSEAE	>sp|Q9HT57|PDXY_PSEAE Pyridoxal kinase PdxY OS=Pseudomonas aeruginosa (strain ATCC 15692 / DSM 22644 / CIP 104116 / JCM 14847 / LMG 12228 / 1C / PRS 101 / PAO1) OX=208964 GN=pdxY PE=1 SV=1	31285	45982.9	38332.4	34379.1	31219.9	32605.4	31867.7	34758.5	36830.3	37261.8	25441.4	16336.9	21606.7	22156.5	21581.9	34970.1	28279.3	77621.2	29537.3	40182.2	9492.24	22416.4	29266.1	46472.6	20589.3	31412.8	58826.3	89646.3	37336.2	44884.6	66223.8	38407.3	65776.7	41209.1	45690.8	79292.4	51612.9	46441.3	34985.2	37257.2
Q9HT58	Q9HT58	PA5515	DUF3301 domain-containing protein	Q9HT58	Q9HT58_PSEAE	>tr|Q9HT58|Q9HT58_PSEAE DUF3301 domain-containing protein OS=Pseudomonas aeruginosa (strain ATCC 15692 / DSM 22644 / CIP 104116 / JCM 14847 / LMG 12228 / 1C / PRS 101 / PAO1) OX=208964 GN=PA5515 PE=4 SV=1	18796.6	13175.1	14633.9	15675.4	16713.3	16876.2	14756.5	11446.6	8404.61	11292.9	16310	13892.8	14256.4	13325.7	15959.5	14248.7	8414.76	20204.3	2462.47	15313	14203.4	7810.87	13226.8	11818.7	19569.8	12466.2	8904.15	14264.3	7729.85	12004.8	11764.9	16360.3	7264.14	10027.7	18534.5	19791.5	12658.6	15013.7	14878	11805.2
Q9HT60	Q9HT60	poxA	AB hydrolase-1 domain-containing protein	Q9HT60	Q9HT60_PSEAE	>tr|Q9HT60|Q9HT60_PSEAE AB hydrolase-1 domain-containing protein OS=Pseudomonas aeruginosa (strain ATCC 15692 / DSM 22644 / CIP 104116 / JCM 14847 / LMG 12228 / 1C / PRS 101 / PAO1) OX=208964 GN=poxA PE=4 SV=1	32447.1	17761.6	18456.3	17750.3	20045.5	19938.8	21406.2	19397.3	15863.3	11390	15617.6	22077.8	15633.3	17631.2	17665.1	18592.1	16579	20169.2	11581.5	15303.9	11520.3	17250.9	12444.4	15482.7	17096.4	19951.4	21458.2	16987.1	13877.8	22147.2	13464.1	16606.6	12590.3	16061.1	20436.8	17046.7	17304.4	12471.7	21540.3	14795.6
Q9HT61	Q9HT61	mifS	histidine kinase	Q9HT61	Q9HT61_PSEAE	>tr|Q9HT61|Q9HT61_PSEAE histidine kinase OS=Pseudomonas aeruginosa (strain ATCC 15692 / DSM 22644 / CIP 104116 / JCM 14847 / LMG 12228 / 1C / PRS 101 / PAO1) OX=208964 GN=mifS PE=4 SV=1	65200.7	95131.2	61654.7	80416.1	74459.3	71449.5	52680.3	57176.1	65013.1	61220.8	69421	75342.6	64201.4	76042.3	66031.1	62852	62037.8	105542	41394.4	70568.6	47744.5	47978.1	76987.7	60338.9	69008.6	83385.9	59294.6	81516.7	52940.2	74531	50870.7	44908.1	67309.2	57213.4	67740.6	81881.7	55312.9	73708.1	69854.3	42218.4
Q9HT62	Q9HT62	mifR	MifR	Q9HT62	Q9HT62_PSEAE	>tr|Q9HT62|Q9HT62_PSEAE MifR OS=Pseudomonas aeruginosa (strain ATCC 15692 / DSM 22644 / CIP 104116 / JCM 14847 / LMG 12228 / 1C / PRS 101 / PAO1) OX=208964 GN=mifR PE=4 SV=1	49629.1	55845	57233	52520.7	55913.5	58744.2	53259.3	35819.4	36416.7	37003.4	31879.6	31180.4	35434.8	25375.3	33074.1	41495.3	29604.8	35736.2	35043.7	31050.1	31101.5	33519.7	33029.2	32905	38196	50673.7	44217.9	33012.3	25044.3	35610.3	34981.8	39293.6	32007.6	40418.2	36247.5	44228.5	47056.4	36636.9	31401.4	34949.8
Q9HT63	Q9HT63	PA5510	Probable transporter	Q9HT63	Q9HT63_PSEAE	>tr|Q9HT63|Q9HT63_PSEAE Probable transporter OS=Pseudomonas aeruginosa (strain ATCC 15692 / DSM 22644 / CIP 104116 / JCM 14847 / LMG 12228 / 1C / PRS 101 / PAO1) OX=208964 GN=PA5510 PE=4 SV=1	48823.9	30362.5	39114	37476.8	38258.9	29686.6	30989	18527.9	74.7105	7697.94	16746.1	17141.6	27279.4	14375.4	20683.1	40389.2	17541.3	16531	7170.82	43389.3	20954	21429.5	21940.2	28320.6	23762.4	15328.2	29642.1	14503.4	28310.7	18515.3	20302.5	25522.1	35308	11035.7	20695.4	35250.3	10620	31356.6	45987.7	12529.2
Q9HT64	Q9HT64	PA5509	N-formylglutamate amidohydrolase	Q9HT64	Q9HT64_PSEAE	>tr|Q9HT64|Q9HT64_PSEAE N-formylglutamate amidohydrolase OS=Pseudomonas aeruginosa (strain ATCC 15692 / DSM 22644 / CIP 104116 / JCM 14847 / LMG 12228 / 1C / PRS 101 / PAO1) OX=208964 GN=PA5509 PE=4 SV=1	24841.3	29126	34670	39400.2	33927.9	34987.4	24270.3	23465	18252.8	23750.9	33001.1	21574	18109.6	22194.3	15014	19311.6	22901.7	10966.5	12769.2	11137.3	13844.3	31946.6	14978	30325.3	35635.5	14939.7	27567.9	32146.4	31096	26091.6	26862.1	25942	29053.5	12270.6	24464.2	40412.8	13498.2	24885.8	22528.2	21495.6
Q9HT65	Q9HT65	PA5508	Probable glutamine synthetase	Q9HT65	Q9HT65_PSEAE	>tr|Q9HT65|Q9HT65_PSEAE Probable glutamine synthetase OS=Pseudomonas aeruginosa (strain ATCC 15692 / DSM 22644 / CIP 104116 / JCM 14847 / LMG 12228 / 1C / PRS 101 / PAO1) OX=208964 GN=PA5508 PE=1 SV=1	47900.6	24572.2	26346.3	27428.1	27615.4	26592.7	20500.1	23387.8	25558.4	25363.6	37596.7	22488.8	33603.2	26761.2	29597.3	16427.2	36615.2	7094.46	15598	12490	10805.6	20573.2	9184.74	22558.7	49630.5	20142	26141	24672.6	11069.9	28699.1	29326.2	24891.1	27326.6	18992.7	40754.2	100862	18709.2	20274.5	20849.2	22188.5
Q9HT66	Q9HT66	PA5507	Isochorismatase-like domain-containing protein	Q9HT66	Q9HT66_PSEAE	>tr|Q9HT66|Q9HT66_PSEAE Isochorismatase-like domain-containing protein OS=Pseudomonas aeruginosa (strain ATCC 15692 / DSM 22644 / CIP 104116 / JCM 14847 / LMG 12228 / 1C / PRS 101 / PAO1) OX=208964 GN=PA5507 PE=4 SV=1	24262.6	126129	165944	140936	154172	138334	86137.1	151462	169995	157508	209082	127031	165902	149579	134874	88261	220659	58528.5	89288.5	76591.4	75998.2	109450	101301	183868	244937	137600	155575	183802	150541	172324	182084	166555	201518	135268	188770	479110	82212.9	158914	111834	149119
Q9HT67	Q9HT67	PA5506	HTH rpiR-type domain-containing protein	Q9HT67	Q9HT67_PSEAE	>tr|Q9HT67|Q9HT67_PSEAE HTH rpiR-type domain-containing protein OS=Pseudomonas aeruginosa (strain ATCC 15692 / DSM 22644 / CIP 104116 / JCM 14847 / LMG 12228 / 1C / PRS 101 / PAO1) OX=208964 GN=PA5506 PE=4 SV=1	32143.8	13861.1	11787.7	11323.7	11922.6	12210.5	10238.6	16236.6	16157.4	20123.7	31530.7	22563.8	26219.3	29987.3	28009.2	16417.8	32547.6	13636.7	5493.38	11494.8	8922.11	9345.35	11688.4	16053.9	46117.8	16418.2	18727.6	21069.8	18288.9	20573	18022.6	17207.4	19031.2	18733.2	23089.3	67361.4	11458	17168.1	25204.3	17105.9
Q9HT68	Q9HT68	PA5505	Probable TonB-dependent receptor	Q9HT68	Q9HT68_PSEAE	>tr|Q9HT68|Q9HT68_PSEAE Probable TonB-dependent receptor OS=Pseudomonas aeruginosa (strain ATCC 15692 / DSM 22644 / CIP 104116 / JCM 14847 / LMG 12228 / 1C / PRS 101 / PAO1) OX=208964 GN=PA5505 PE=1 SV=1	28065.4	156348	140406	138634	140019	157529	136734	157023	431284	297667	339619	229060	305800	259424	319938	206228	292558	246702	393869	212063	233927	284602	74047.2	154034	208999	154376	154260	209825	276147	284622	291662	236302	285241	214534	105556	260239	98804	173788	155648	79289.8
Q9HT69	Q9HT69	PA5504	D-methionine ABC transporter membrane protein	Q9HT69	Q9HT69_PSEAE	>tr|Q9HT69|Q9HT69_PSEAE D-methionine ABC transporter membrane protein OS=Pseudomonas aeruginosa (strain ATCC 15692 / DSM 22644 / CIP 104116 / JCM 14847 / LMG 12228 / 1C / PRS 101 / PAO1) OX=208964 GN=PA5504 PE=3 SV=1	24400.2	122258	129473	146413	121690	142419	154860	161568	109095	142729	158287	166386	138448	177237	178453	150163	168196	124461	89699.6	199341	37294.5	236165	139777	163578	145214	153085	166950	130695	148930	122629	146016	151525	106280	143194	207825	154455	156454	82026.1	144650	148291
Q9HT70	Q9HT70	metN2	Methionine import ATP-binding protein MetN 2	Q9HT70	METN2_PSEAE	>sp|Q9HT70|METN2_PSEAE Methionine import ATP-binding protein MetN 2 OS=Pseudomonas aeruginosa (strain ATCC 15692 / DSM 22644 / CIP 104116 / JCM 14847 / LMG 12228 / 1C / PRS 101 / PAO1) OX=208964 GN=metN2 PE=3 SV=1	36759.1	252019	276879	264771	271179	256341	248207	111940	95907	124919	71238.9	134341	113712	92757.5	126531	245609	226103	110396	76015	127288	54446.8	133118	103161	136289	162937	223701	239018	146026	145175	107937	127477	201897	86438.7	115806	229319	257458	190618	97279.7	184782	121471
Q9HT71	Q9HT71	PA5502	Lipoprotein	Q9HT71	Q9HT71_PSEAE	>tr|Q9HT71|Q9HT71_PSEAE Lipoprotein OS=Pseudomonas aeruginosa (strain ATCC 15692 / DSM 22644 / CIP 104116 / JCM 14847 / LMG 12228 / 1C / PRS 101 / PAO1) OX=208964 GN=PA5502 PE=4 SV=1	27980.9	21172.2	17800.3	20617.5	16690.4	18328.1	7558.68	27857.6	32076.3	27135.7	25531.5	30093.4	32026.3	29702.9	30553.2	30629.7	35375.5	34636.9	30263.2	27532.9	28482.4	32673.8	26967.1	25261.7	26659.2	33241.6	19447.7	24276.5	36160.8	23925.9	24043.3	22854.5	30969.5	33877.6	31537.3	52287.8	29505.5	31848.7	31012.6	34726.2
Q9HT73	Q9HT73	znuC	Zinc import ATP-binding protein ZnuC	Q9HT73	ZNUC_PSEAE	>sp|Q9HT73|ZNUC_PSEAE Zinc import ATP-binding protein ZnuC OS=Pseudomonas aeruginosa (strain ATCC 15692 / DSM 22644 / CIP 104116 / JCM 14847 / LMG 12228 / 1C / PRS 101 / PAO1) OX=208964 GN=znuC PE=3 SV=1	29155.8	16417.8	17777.6	9596.9	19600.9	23303.9	18959.6	16534.7	20147.5	20211.3	20188.9	9426.02	24271.9	13273.6	14136.8	14244.7	11265.4	16481.6	35813.2	9087.94	12938.8	9804.72	11830.7	24147	16269.8	17600.6	14908.9	17591.6	2292.07	24690.1	16969	11601.6	12177.1	21352.5	12776.8	21076.5	17611.3	18793.7	17630.4	22031.3
Q9HT74	Q9HT74	np20	Transcriptional regulator np20	Q9HT74	Q9HT74_PSEAE	>tr|Q9HT74|Q9HT74_PSEAE Transcriptional regulator np20 OS=Pseudomonas aeruginosa (strain ATCC 15692 / DSM 22644 / CIP 104116 / JCM 14847 / LMG 12228 / 1C / PRS 101 / PAO1) OX=208964 GN=np20 PE=3 SV=1	18215.8	36435.7	53125.3	43665.8	55266.8	65116.9	50777.6	57875.2	75470.8	81449.2	62761.1	4538.83	54753.1	57622.9	44658.8	39846.7	38355	49197.5	191954	11672.7	44141.1	37284.5	53318.4	69274.3	58918.3	35446.3	32268.7	62511.7	5306.02	107073	85201.5	60292.2	53853.5	63417.3	41615.1	82960.4	54404.1	85159.9	42165.3	69761.7
Q9HT75	Q9HT75	PA5498	High-affinity zinc uptake system protein ZnuA	Q9HT75	Q9HT75_PSEAE	>tr|Q9HT75|Q9HT75_PSEAE High-affinity zinc uptake system protein ZnuA OS=Pseudomonas aeruginosa (strain ATCC 15692 / DSM 22644 / CIP 104116 / JCM 14847 / LMG 12228 / 1C / PRS 101 / PAO1) OX=208964 GN=PA5498 PE=3 SV=1	33608.4	17649.1	21626.4	18183.8	19638.7	20394	14952.1	34071.2	51706.4	40814.5	42863.8	87641.7	36336.5	28670.8	34551.2	15177.8	34092.3	39442.7	182798	10332.5	69615.1	33524.1	6767.39	47884.2	38340.6	23243.8	22332.8	36634.5	34187.4	42566.4	55377.6	20833.6	47941.9	49737.5	9723.46	31057.6	18065.4	45624.5	15947.6	23247.6
Q9HT76	Q9HT76	nrdJa	Vitamin B12-dependent ribonucleotide reductase	Q9HT76	Q9HT76_PSEAE	>tr|Q9HT76|Q9HT76_PSEAE Vitamin B12-dependent ribonucleotide reductase OS=Pseudomonas aeruginosa (strain ATCC 15692 / DSM 22644 / CIP 104116 / JCM 14847 / LMG 12228 / 1C / PRS 101 / PAO1) OX=208964 GN=nrdJa PE=3 SV=1	82741.2	407438	422765	407496	416993	406442	417871	521361	903765	657488	231196	171722	272993	278189	314482	324392	200392	358896	400292	312285	389421	271407	577911	559092	293639	503280	401818	590064	421073	749427	802719	367065	690396	520150	253061	174747	224661	617046	404040	565721
Q9HT77	Q9HT77	nrdJb	NrdJb	Q9HT77	Q9HT77_PSEAE	>tr|Q9HT77|Q9HT77_PSEAE NrdJb OS=Pseudomonas aeruginosa (strain ATCC 15692 / DSM 22644 / CIP 104116 / JCM 14847 / LMG 12228 / 1C / PRS 101 / PAO1) OX=208964 GN=nrdJb PE=4 SV=1	24885.7	382417	397088	390391	433897	437504	317577	439001	888770	584687	316802	192126	288823	323204	279912	244253	184868	222118	376385	244506	498201	292618	472176	483371	322721	448741	292821	473932	365739	715766	648422	306209	652923	458724	212944	207639	183802	659501	282417	543102
Q9HT79	Q9HT79	PA5494	DUF2782 domain-containing protein	Q9HT79	Q9HT79_PSEAE	>tr|Q9HT79|Q9HT79_PSEAE DUF2782 domain-containing protein OS=Pseudomonas aeruginosa (strain ATCC 15692 / DSM 22644 / CIP 104116 / JCM 14847 / LMG 12228 / 1C / PRS 101 / PAO1) OX=208964 GN=PA5494 PE=1 SV=1	10794.4	206028	219827	208367	104519	141790	194509	79793.4	157558	222796	157650	131051	89978.6	131445	143778	6471.27	123493	130640	252533	99758.8	207081	201323	116080	182522	44707.8	105654	131290	50141.7	155222	78294.6	147743	165410	114531	109225	99409.5	62034.3	86364.3	132748	153241	100895
Q9HT80	Q9HT80	polA	DNA polymerase I	Q9HT80	DPO1_PSEAE	>sp|Q9HT80|DPO1_PSEAE DNA polymerase I OS=Pseudomonas aeruginosa (strain ATCC 15692 / DSM 22644 / CIP 104116 / JCM 14847 / LMG 12228 / 1C / PRS 101 / PAO1) OX=208964 GN=polA PE=3 SV=1	99792.9	150921	164286	165459	164685	163645	190877	184806	178675	187896	199303	203555	190268	190750	188606	180053	207886	226680	152303	211770	142780	158089	199772	192279	150933	172122	212900	184061	194447	187703	188123	190087	181229	174696	221283	210694	178365	193018	214607	198438
Q9HT81	Q9HT81	engB	Probable GTP-binding protein EngB	Q9HT81	ENGB_PSEAE	>sp|Q9HT81|ENGB_PSEAE Probable GTP-binding protein EngB OS=Pseudomonas aeruginosa (strain ATCC 15692 / DSM 22644 / CIP 104116 / JCM 14847 / LMG 12228 / 1C / PRS 101 / PAO1) OX=208964 GN=engB PE=3 SV=1	23786.3	133490	156719	152655	135764	162238	107345	116529	107452	122057	93841.5	76451	80890.7	72024.2	76884.5	74696.3	137114	67745.5	128665	67592.2	53258	57228.3	72192.2	92144.6	89590.6	96916.7	127292	126923	75445.6	128975	158931	126434	123286	118495	94210.4	182274	194648	93237.7	59945.6	92985.7
Q9HT83	Q9HT83	PA5488	Endonuclease/exonuclease/phosphatase domain-containing protein	Q9HT83	Q9HT83_PSEAE	>tr|Q9HT83|Q9HT83_PSEAE Endonuclease/exonuclease/phosphatase domain-containing protein OS=Pseudomonas aeruginosa (strain ATCC 15692 / DSM 22644 / CIP 104116 / JCM 14847 / LMG 12228 / 1C / PRS 101 / PAO1) OX=208964 GN=PA5488 PE=4 SV=1	32949.5	19998.5	11960.5	18545.6	23380.6	24660.6	16122.6	14995	10701.3	12544.2	16710.1	9017.24	14698	12968.8	11166.3	14852.2	15175.9	17302.2	230.998	20369.7	16273.1	15362.8	16808.6	10519.1	9154.57	12218.3	9413.96	17228.9	11576.9	20255.6	10085.3	17706.3	10033.7	9819.37	8237.15	33154.2	20007.7	21166.9	11773.7	10981.7
Q9HT84	Q9HT84	dgcP	Diguanylate cyclase DgcP	Q9HT84	DGCP_PSEAE	>sp|Q9HT84|DGCP_PSEAE Diguanylate cyclase DgcP OS=Pseudomonas aeruginosa (strain ATCC 15692 / DSM 22644 / CIP 104116 / JCM 14847 / LMG 12228 / 1C / PRS 101 / PAO1) OX=208964 GN=dgcP PE=1 SV=1	73999.1	58502.7	52407.6	51852.4	51459.1	59859.6	83759.9	61222.1	68991	66572.5	81080.2	56606.6	61085.4	70556.6	64547.9	55245	41587.9	45057.8	64965.3	65088.7	73012.3	63595.9	72070.2	60765.8	63520.6	50965.8	47176.2	77507.6	57533.8	98248.6	72743.5	49140.2	68514.1	69781.7	50438.4	92976.5	49625	80743.8	67148.2	70223.8
Q9HT86	Q9HT86	ampDh2	N-acetylmuramoyl-L-alanine amidase	Q9HT86	Q9HT86_PSEAE	>tr|Q9HT86|Q9HT86_PSEAE N-acetylmuramoyl-L-alanine amidase OS=Pseudomonas aeruginosa (strain ATCC 15692 / DSM 22644 / CIP 104116 / JCM 14847 / LMG 12228 / 1C / PRS 101 / PAO1) OX=208964 GN=ampDh2 PE=1 SV=1	28880.8	69835.7	70594.5	71320.2	68453.1	65001.7	57001.6	66964.8	60545	51966.1	47646.3	52402.7	57480.7	41168.1	52515.2	52489	55878.2	33831.8	54228.6	47239.6	33382.9	82760	44748.9	49059.9	54186.4	62210.4	57544.8	42269	42293.7	44863.4	48851.7	39442.6	39598.7	48184.6	70055.2	57908.4	65570	36121.7	55147.4	48076.6
Q9HT87	Q9HT87	PA5484	histidine kinase	Q9HT87	Q9HT87_PSEAE	>tr|Q9HT87|Q9HT87_PSEAE histidine kinase OS=Pseudomonas aeruginosa (strain ATCC 15692 / DSM 22644 / CIP 104116 / JCM 14847 / LMG 12228 / 1C / PRS 101 / PAO1) OX=208964 GN=PA5484 PE=1 SV=1	65999.6	18459.4	19824.7	19035.9	19777.4	19993	18028.5	26050.2	25026.5	25332.5	25626.7	14487.5	23785.9	23773.4	21199.9	16019.6	18135.2	32837.9	17275.4	22057.4	23459.1	23645.6	22467.8	25359.7	18537.5	37540.2	18778.1	29965.2	28405.8	31524.2	31647.3	17470.8	29011.5	26105.8	19144.5	147192	20644.7	36291.8	16533.8	30233.9
Q9HT89	Q9HT89	PA5481	Uncharacterized protein PA5481	Q9HT89	YID1_PSEAE	>sp|Q9HT89|YID1_PSEAE Uncharacterized protein PA5481 OS=Pseudomonas aeruginosa (strain ATCC 15692 / DSM 22644 / CIP 104116 / JCM 14847 / LMG 12228 / 1C / PRS 101 / PAO1) OX=208964 GN=PA5481 PE=3 SV=1	17365.6	55451.1	52476.8	54414.4	54421.5	50348.2	72992.9	235593	613404	704732	594629	323118	513663	358584	445140	43851	196051	214895	1.01068e+06	141129	518048	548172	53798	160543	284248	614173	33030.9	512694	393648	921473	577363	48387.7	620789	461248	11307.6	22316.4	143543	383870	87092.1	155844
Q9HT91	Q9HT91	gltP	Probable proton/glutamate-aspartate symporter	Q9HT91	Q9HT91_PSEAE	>tr|Q9HT91|Q9HT91_PSEAE Probable proton/glutamate-aspartate symporter OS=Pseudomonas aeruginosa (strain ATCC 15692 / DSM 22644 / CIP 104116 / JCM 14847 / LMG 12228 / 1C / PRS 101 / PAO1) OX=208964 GN=gltP PE=3 SV=1	47620.9	37574	42342.2	37730.8	42086.1	43934.5	30077.7	7420.24	7395.58	4041.45	8599.64	12012.4	13287.7	5336.12	11445.9	39367.1	47037.4	4042.38	4338.19	35044.1	7666.93	6285.15	6851.48	8339.49	12550	34444.8	21560	8814.59	15000.5	7327.69	10007.5	34552.6	5487.43	7251.87	48919.9	56664.3	10436	2821.6	27815.4	4238.78
Q9HT92	Q9HT92	PA5478	Nucleoside transporter/FeoB GTPase Gate domain-containing protein	Q9HT92	Q9HT92_PSEAE	>tr|Q9HT92|Q9HT92_PSEAE Nucleoside transporter/FeoB GTPase Gate domain-containing protein OS=Pseudomonas aeruginosa (strain ATCC 15692 / DSM 22644 / CIP 104116 / JCM 14847 / LMG 12228 / 1C / PRS 101 / PAO1) OX=208964 GN=PA5478 PE=4 SV=1	43038.2	4305.1	15641.5	8660.65	12257.9	17214.2	19201.4	9154.49	6782.6	11368.1	12594.2	4118.23	17615.7	12703.7	9004.61	5032.61	7025.41	16182.9	2573.85	11464.4	2641.16	9563.95	9904.72	5420.39	8617.81	7344.69	13817.5	9579.08	8399.08	9524.44	28142.8	14525.1	9446.25	3525.03	11557.2	16136.2	4472.59	11048.3	2717.42	4989.18
Q9HT95	Q9HT95	PA5475	Acetyltransferase PA5475	Q9HT95	ATSE4_PSEAE	>sp|Q9HT95|ATSE4_PSEAE Acetyltransferase PA5475 OS=Pseudomonas aeruginosa (strain ATCC 15692 / DSM 22644 / CIP 104116 / JCM 14847 / LMG 12228 / 1C / PRS 101 / PAO1) OX=208964 GN=PA5475 PE=4 SV=1	21000.6	470818	628598	632937	540922	655728	438699	219128	234187	246144	273452	158290	231664	154145	213609	164905	163075	58411.7	90928.4	146499	52478.9	148351	96216.1	294875	217442	455574	295286	476301	109284	272958	253437	294078	288952	208406	176799	58053.8	33296.6	182079	142570	223216
Q9HT96	Q9HT96	PA5474	Probable metalloprotease	Q9HT96	Q9HT96_PSEAE	>tr|Q9HT96|Q9HT96_PSEAE Probable metalloprotease OS=Pseudomonas aeruginosa (strain ATCC 15692 / DSM 22644 / CIP 104116 / JCM 14847 / LMG 12228 / 1C / PRS 101 / PAO1) OX=208964 GN=PA5474 PE=3 SV=1	51359.2	36706.6	36233.4	32300.6	31525.3	38490.3	52962.3	68167.6	72436	35007.6	51118.9	48256.9	45652.8	49882.5	46903.4	28023.7	21005.4	113271	12344.7	38924	68981.9	59234.3	27174.3	40469.4	50292.3	45821	37167.7	45513.1	40862.9	61501.6	55457.1	17165	68632.1	61248.1	24067.4	59923.5	60793.5	56038.5	37193	39125.2
Q9HT97	Q9HT97	PA5473	PhoU domain-containing protein	Q9HT97	Q9HT97_PSEAE	>tr|Q9HT97|Q9HT97_PSEAE PhoU domain-containing protein OS=Pseudomonas aeruginosa (strain ATCC 15692 / DSM 22644 / CIP 104116 / JCM 14847 / LMG 12228 / 1C / PRS 101 / PAO1) OX=208964 GN=PA5473 PE=4 SV=1	63261.8	5134.35	3839.12	3272.68	4638.22	4088.23	3022.33	5469.41	3438.78	6297.85	7780.46	5673.07	6547.14	6905.2	5523	2409.27	2979.94	10168.1	3142.42	6357.03	4642.27	4065.93	3510.33	4112.22	4731.97	8352.84	1308.5	4545.42	4337.69	5708.84	4307.41	2505.87	3236.91	4854.29	1537.07	27450.1	3675.73	7750.11	6526.18	4352.77
Q9HT98	Q9HT98	PA5472	Amino acid abc transporter substrate-binding paat family protein	Q9HT98	Q9HT98_PSEAE	>tr|Q9HT98|Q9HT98_PSEAE Amino acid abc transporter substrate-binding paat family protein OS=Pseudomonas aeruginosa (strain ATCC 15692 / DSM 22644 / CIP 104116 / JCM 14847 / LMG 12228 / 1C / PRS 101 / PAO1) OX=208964 GN=PA5472 PE=4 SV=1	29148	18090.9	17333.9	18789.5	17471	14792.2	34184.5	21333.6	20482.1	15246.3	13736.6	20853.4	24592.1	11618.7	32613.2	76147.9	61067	9934.55	16998.2	18607.1	7395.04	27760.7	26309.8	28623.2	49325.3	11733.1	38367.8	35382.4	63509.5	30860.9	42348.6	51382.3	38701	17660.8	59149.4	11081.6	7455.35	27916.9	38704.4	16275.5
Q9HT99	Q9HT99	PA5471	3'-phosphate/5'-hydroxy nucleic acid ligase	Q9HT99	Q9HT99_PSEAE	>tr|Q9HT99|Q9HT99_PSEAE 3'-phosphate/5'-hydroxy nucleic acid ligase OS=Pseudomonas aeruginosa (strain ATCC 15692 / DSM 22644 / CIP 104116 / JCM 14847 / LMG 12228 / 1C / PRS 101 / PAO1) OX=208964 GN=PA5471 PE=4 SV=1	41026.9	39281.7	49533.8	42375.3	46921.6	38896.8	29196.1	28120.7	13225.2	29745.1	21685.5	20330.7	22311.8	15192.7	20847.7	31297.8	24042.7	22997.8	20625.3	13886.9	9561.66	14697.4	20889	27365.6	49871.3	18713.5	32761.1	21494.7	16647.8	16461.8	21488.1	18069.5	19418.6	19900.8	19150.1	32830.5	19156.5	24826.3	19241.8	14668.2
Q9HTA0	Q9HTA0	PA5470	Probable peptide chain release factor	Q9HTA0	Q9HTA0_PSEAE	>tr|Q9HTA0|Q9HTA0_PSEAE Probable peptide chain release factor OS=Pseudomonas aeruginosa (strain ATCC 15692 / DSM 22644 / CIP 104116 / JCM 14847 / LMG 12228 / 1C / PRS 101 / PAO1) OX=208964 GN=PA5470 PE=3 SV=1	22282.5	356.624	8698.3	10913.6	8476.61	8885.62	17397.1	7035.55	2784.8	3633.72	5138.8	5162.84	6871.48	5220.85	7561.61	19743.8	7673.88	1117.36	3518.53	295.641	1485.55	4927.64	3847.34	6828.82	14364.9	4413.07	2544.03	4331.77	4247.36	2965.91	5764.91	9135.09	13165.1	4465.59	6252.02	8607.99	9892.46	4071.5	3520.83	8034.93
Q9HTA5	Q9HTA5	PA5465	CENP-V/GFA domain-containing protein	Q9HTA5	Q9HTA5_PSEAE	>tr|Q9HTA5|Q9HTA5_PSEAE CENP-V/GFA domain-containing protein OS=Pseudomonas aeruginosa (strain ATCC 15692 / DSM 22644 / CIP 104116 / JCM 14847 / LMG 12228 / 1C / PRS 101 / PAO1) OX=208964 GN=PA5465 PE=3 SV=1	15270.2	5567.47	6547.95	5236.5	6514.21	1663.01	4837.5	7004.01	6163.4	4863.76	8515.72	4740.85	6849.32	8420.29	7776.28	8037.73	5049.19	8030.52	5544.65	3826.72	3501.66	4474.69	11649.2	5129.52	4925	3778.24	711.76	5571.98	861.589	14464.3	4995.52	2478.49	3582.91	4443.96	358.683	6593.38	1121.01	7948.63	6767.27	4785.08
Q9HTA6	Q9HTA6	PA5464	DUF4105 domain-containing protein	Q9HTA6	Q9HTA6_PSEAE	>tr|Q9HTA6|Q9HTA6_PSEAE DUF4105 domain-containing protein OS=Pseudomonas aeruginosa (strain ATCC 15692 / DSM 22644 / CIP 104116 / JCM 14847 / LMG 12228 / 1C / PRS 101 / PAO1) OX=208964 GN=PA5464 PE=4 SV=1	74370.4	17796.7	17982.1	17526.2	17423.6	17294.3	15313	16558.9	10899.8	9837.54	14632.2	13927.1	15264.1	12552.5	18474.6	13973.8	14901.8	10819.3	7216.91	21661.6	19259.3	14063.1	13155.7	18064.5	12116.9	13831.1	24819	21186.9	19815.3	14764.3	13668.2	13125.5	14312.5	15423.3	18276.2	48146.5	16281.1	10364.3	22753.2	13504.2
Q9HTB1	Q9HTB1	PA5459	Methyltransferase type 11 domain-containing protein	Q9HTB1	Q9HTB1_PSEAE	>tr|Q9HTB1|Q9HTB1_PSEAE Methyltransferase type 11 domain-containing protein OS=Pseudomonas aeruginosa (strain ATCC 15692 / DSM 22644 / CIP 104116 / JCM 14847 / LMG 12228 / 1C / PRS 101 / PAO1) OX=208964 GN=PA5459 PE=4 SV=1	30701	76489.7	94223.3	92865.1	92028.5	83180.8	89789.6	77610.8	61122.7	66775.2	67976.2	55841.7	62342	71298.5	65739	59857	52946	41851.7	18092.7	46728.3	51186.9	69096.2	70372.5	71416.6	60008.9	77688.6	80795.5	80665.3	40089.4	63727.6	78776.1	84369.4	74555.2	66488.1	56683.7	37849.6	60931.3	79513.7	62547	70473.4
Q9HTB3	Q9HTB3	PA5457	Class I SAM-dependent methyltransferase	Q9HTB3	Q9HTB3_PSEAE	>tr|Q9HTB3|Q9HTB3_PSEAE Class I SAM-dependent methyltransferase OS=Pseudomonas aeruginosa (strain ATCC 15692 / DSM 22644 / CIP 104116 / JCM 14847 / LMG 12228 / 1C / PRS 101 / PAO1) OX=208964 GN=PA5457 PE=4 SV=1	31744.4	22835.7	23252.8	23849.2	24514	24406.5	28709.1	20729.4	26966.8	22561.4	22813.7	21375.1	22288.2	23614.1	22695.6	24337.8	16460.4	17864.7	18335.6	14147.2	18572	27670.8	16675	21365.3	22740.5	26321	23523.8	27110.8	20325.7	21411.9	21254.1	22988.9	21168	23731	22430.7	15233.4	20566.5	20713.8	15765.6	22903
Q9HTB4	Q9HTB4	PA5456	Glycosyltransferase	Q9HTB4	Q9HTB4_PSEAE	>tr|Q9HTB4|Q9HTB4_PSEAE Glycosyltransferase OS=Pseudomonas aeruginosa (strain ATCC 15692 / DSM 22644 / CIP 104116 / JCM 14847 / LMG 12228 / 1C / PRS 101 / PAO1) OX=208964 GN=PA5456 PE=4 SV=1	49370.7	31807.6	33732.6	30400.3	33745.3	42241.4	32752.3	30875.4	26306.4	43114.5	32994.1	35071.3	35944.6	42241.3	34986.6	41602.2	28700.8	21021.6	22952.9	27297.1	18026	39785.4	32596.4	31899.6	34730.9	36475.3	25971	42371.2	30867.3	37227.6	48906.6	45555.1	24202.1	34870.4	31791.1	44776.6	28945.6	32056.4	25217	32275.1
Q9HTB5	Q9HTB5	PA5455	Glycosyltransferase	Q9HTB5	Q9HTB5_PSEAE	>tr|Q9HTB5|Q9HTB5_PSEAE Glycosyltransferase OS=Pseudomonas aeruginosa (strain ATCC 15692 / DSM 22644 / CIP 104116 / JCM 14847 / LMG 12228 / 1C / PRS 101 / PAO1) OX=208964 GN=PA5455 PE=4 SV=1	61018.6	49136.8	49817.2	47831.6	53727.4	51371.7	52933.2	27221.9	27596.6	44573.9	34398.8	38581.7	45388.4	38767.1	42945.1	51977.2	31952.4	29919.8	2268.48	38861.6	27131	35401.3	38361.5	38621.2	43916.1	44811.8	43943	41364.7	40676.9	37733.7	43531.8	51936.7	32262.9	31882.2	37342.7	34312.8	32288.1	38865.2	41093.7	37519.7
Q9HTB6	Q9HTB6	rmd	GDP-6-deoxy-D-mannose reductase	Q9HTB6	RMD_PSEAE	>sp|Q9HTB6|RMD_PSEAE GDP-6-deoxy-D-mannose reductase OS=Pseudomonas aeruginosa (strain ATCC 15692 / DSM 22644 / CIP 104116 / JCM 14847 / LMG 12228 / 1C / PRS 101 / PAO1) OX=208964 GN=rmd PE=1 SV=1	33928.8	58282.7	55417.7	57092.5	54312.4	53233.2	34185.4	33799.9	25721.6	60789.3	51754.7	48776.1	59338.9	64809.9	55649.2	37481.5	30166.2	45137.6	32167.9	58867.6	87186.9	66838.5	63586.9	56029.8	34157.5	54287	55105.2	30233.3	39901.8	62614.9	48655.6	50237.8	62936.4	39923.3	14126	50449.1	20085.3	91909	69879.1	54884
Q9HTB7	Q9HTB7	wbpW	mannose-1-phosphate guanylyltransferase	Q9HTB7	Q9HTB7_PSEAE	>tr|Q9HTB7|Q9HTB7_PSEAE mannose-1-phosphate guanylyltransferase OS=Pseudomonas aeruginosa (strain ATCC 15692 / DSM 22644 / CIP 104116 / JCM 14847 / LMG 12228 / 1C / PRS 101 / PAO1) OX=208964 GN=wbpW PE=3 SV=1	52574.5	26107.4	28765.2	30176.9	31676	30029.6	28972.8	31218	26328.6	33730	34245	31317	28379.7	35523.6	34211.1	32322	17162.1	14212.9	14647	25927.6	56351.4	34465.8	42621.3	28720.2	20598.7	35848.8	33000.4	43549.8	28801.6	61353	52763.9	37079	32673.7	29513.5	17289.3	45652.5	14126.5	70168.1	29179.4	39801.8
Q9HTB8	Q9HTB8	wzm	Transport permease protein	Q9HTB8	Q9HTB8_PSEAE	>tr|Q9HTB8|Q9HTB8_PSEAE Transport permease protein OS=Pseudomonas aeruginosa (strain ATCC 15692 / DSM 22644 / CIP 104116 / JCM 14847 / LMG 12228 / 1C / PRS 101 / PAO1) OX=208964 GN=wzm PE=3 SV=1	29481.5	9531.59	12939.1	12222.7	11137.4	10129.6	9009.54	5784.5	2831.95	10772	9695.93	5582.61	9374.46	7038.53	12705.8	5198.01	2951.8	4718.82	1282.53	15148.4	11496.9	9924.31	7751.95	3839.82	3284.78	7304.41	8981.88	5334.07	7364.41	5088.73	5483.8	5753.32	7183.07	7377.78	2489.76	1007.63	3777.13	9059.01	8795.09	7889.54
Q9HTB9	Q9HTB9	wbpY	Glycosyltransferase WbpY	Q9HTB9	Q9HTB9_PSEAE	>tr|Q9HTB9|Q9HTB9_PSEAE Glycosyltransferase WbpY OS=Pseudomonas aeruginosa (strain ATCC 15692 / DSM 22644 / CIP 104116 / JCM 14847 / LMG 12228 / 1C / PRS 101 / PAO1) OX=208964 GN=wbpY PE=4 SV=1	42016.3	14337.3	23135.4	21114.7	21049.3	20238.9	15857.6	16507.2	14757.1	14837.3	7356.27	6013.55	10159.3	5625.43	9888.77	12728.4	7924.9	13537.9	12507.4	11394.6	6009.26	6299.28	9369.49	20060.1	4767.81	19673.8	15860.7	18205.3	15216.9	20287.3	18389.8	17162	19090.2	15105.3	7294.16	24370.9	9159.49	23205.2	13748.2	17865.1
Q9HTC0	Q9HTC0	wbpZ	D-rhamnosyltransferase WbpZ	Q9HTC0	WBPZ_PSEAE	>sp|Q9HTC0|WBPZ_PSEAE D-rhamnosyltransferase WbpZ OS=Pseudomonas aeruginosa (strain ATCC 15692 / DSM 22644 / CIP 104116 / JCM 14847 / LMG 12228 / 1C / PRS 101 / PAO1) OX=208964 GN=wbpZ PE=1 SV=1	43439.9	21800.6	20323.7	16241.3	19852.1	23222.8	12417.7	11659.9	11938.4	15429.1	20951.6	14700.3	29989	18680.5	34555.6	46617.5	19320.7	15907.7	15579.5	19065.3	6902.82	8618.77	15737.8	14002.6	17620.9	20049.9	29327.1	20302	11267.5	23561.8	15330.4	22743	22841.4	13914.9	11846.7	21248.1	15000.2	40674.5	34837.1	19438.8
Q9HTC1	Q9HTC1	PA5446	DUF1127 domain-containing protein	Q9HTC1	Q9HTC1_PSEAE	>tr|Q9HTC1|Q9HTC1_PSEAE DUF1127 domain-containing protein OS=Pseudomonas aeruginosa (strain ATCC 15692 / DSM 22644 / CIP 104116 / JCM 14847 / LMG 12228 / 1C / PRS 101 / PAO1) OX=208964 GN=PA5446 PE=4 SV=1	7880.99	159748	163690	154211	164993	146336	165510	103331	117065	107826	78126.2	17816.3	66587.6	58405.9	43774.4	28410.4	41195.6	141887	60754.2	19841.1	87721.1	91692.2	84246.4	159689	40864.4	153682	191544	77761.3	150940	117526	88350.7	94609.6	76290.6	148759	74633.2	51075.8	13695.5	108528	132877	105877
Q9HTC2	Q9HTC2	PA5445	Probable coenzyme A transferase	Q9HTC2	Q9HTC2_PSEAE	>tr|Q9HTC2|Q9HTC2_PSEAE Probable coenzyme A transferase OS=Pseudomonas aeruginosa (strain ATCC 15692 / DSM 22644 / CIP 104116 / JCM 14847 / LMG 12228 / 1C / PRS 101 / PAO1) OX=208964 GN=PA5445 PE=1 SV=1	53964.7	27796.2	24787.7	16262.5	30716.4	35257.8	20915.3	25685.2	20506.2	31260.7	20298.4	16298.5	34610.6	19925	48344.9	47365.5	75011.9	50241.8	24193.8	89908.1	1906.16	12429.2	24037.9	26360	24133.6	63845.9	49990.6	52386.2	51059.2	24236.3	21314.3	36988.7	70661	20465.5	87966.7	162434	91952.6	16955.7	62029.8	33220
Q9HTC4	Q9HTC4	PA5442	EAL domain-containing protein	Q9HTC4	Q9HTC4_PSEAE	>tr|Q9HTC4|Q9HTC4_PSEAE EAL domain-containing protein OS=Pseudomonas aeruginosa (strain ATCC 15692 / DSM 22644 / CIP 104116 / JCM 14847 / LMG 12228 / 1C / PRS 101 / PAO1) OX=208964 GN=PA5442 PE=4 SV=1	106371	30935	28681.7	20967.8	20801.8	27106.7	19944.8	11296.5	4410.06	3019.73	8950.34	15727.8	15108.2	4856.69	19015.1	7164.2	13176.2	17606.1	10363.3	8675.42	9467.41	10474.8	16512.9	11533.1	18125.4	8357.36	21953.4	16111.1	7391.44	20718.5	19235.2	22614.7	12203.8	13594.3	14009.7	19191.4	6903.92	10720.1	10526.1	11310.2
Q9HTC5	Q9HTC5	PA5441	Outer membrane assembly lipoprotein YfiO	Q9HTC5	Q9HTC5_PSEAE	>tr|Q9HTC5|Q9HTC5_PSEAE Outer membrane assembly lipoprotein YfiO OS=Pseudomonas aeruginosa (strain ATCC 15692 / DSM 22644 / CIP 104116 / JCM 14847 / LMG 12228 / 1C / PRS 101 / PAO1) OX=208964 GN=PA5441 PE=4 SV=1	80037.3	104687	100446	96610.9	95719.2	95487.9	166441	117484	80098	107352	117993	160572	124878	29589.3	167154	205834	153281	211354	91219.4	100242	123617	41410.9	140632	190217	266689	16686.9	190457	112005	141634	117422	110541	187605	130522	109074	194143	23615.5	180054	130186	135681	59099.1
Q9HTC6	Q9HTC6	PA5440	Probable peptidase	Q9HTC6	Q9HTC6_PSEAE	>tr|Q9HTC6|Q9HTC6_PSEAE Probable peptidase OS=Pseudomonas aeruginosa (strain ATCC 15692 / DSM 22644 / CIP 104116 / JCM 14847 / LMG 12228 / 1C / PRS 101 / PAO1) OX=208964 GN=PA5440 PE=3 SV=1	51760.6	204655	213073	197250	206207	194615	101844	33170.3	28193.9	30548.4	35447	53819.2	49770.8	48600	53929.1	143398	93929.9	19360.9	35840.2	125170	19799.3	32785.3	59376.1	46093.9	44133.6	91647.8	70240.9	53250.5	55052.2	39275	45004.9	90741.1	34671.4	40600	154698	12070.6	19752.6	32861.8	59540.1	34651.9
Q9HTC7	Q9HTC7	zwf	Glucose-6-phosphate 1-dehydrogenase	Q9HTC7	Q9HTC7_PSEAE	>tr|Q9HTC7|Q9HTC7_PSEAE Glucose-6-phosphate 1-dehydrogenase OS=Pseudomonas aeruginosa (strain ATCC 15692 / DSM 22644 / CIP 104116 / JCM 14847 / LMG 12228 / 1C / PRS 101 / PAO1) OX=208964 GN=zwf PE=3 SV=1	54591.3	56076.2	49735.9	55837	48191.5	53648.9	33724.4	62282.8	51530.4	53021.7	52707.2	46354.1	60368.2	57555.8	53614.5	37707.7	32492.9	56922.8	60178.2	51531.4	46695.3	44665.5	29130.2	41301.6	40226.5	43444.6	33180.4	42455.3	43165.1	73173.3	48635.1	35708.4	38630.1	71538.5	29078.1	49060.6	56402.2	44607.7	37278.7	47973.8
Q9HTC8	Q9HTC8	PA5438	Probable transcriptional regulator	Q9HTC8	Q9HTC8_PSEAE	>tr|Q9HTC8|Q9HTC8_PSEAE Probable transcriptional regulator OS=Pseudomonas aeruginosa (strain ATCC 15692 / DSM 22644 / CIP 104116 / JCM 14847 / LMG 12228 / 1C / PRS 101 / PAO1) OX=208964 GN=PA5438 PE=1 SV=1	31680.4	76124.6	75853.3	73548.2	80852	84853.6	65305.9	50776.8	57634.9	70957.5	73912.1	65686.8	69458.5	62974.1	68439	67027	72602.1	68985.8	40112.5	47637.6	21535.1	68063	71155.3	55774.6	68510.1	62200.9	54406.8	62055.1	44151.5	63384.5	65001.1	64801.2	55442.1	48092.8	67039.6	109579	68431.4	61322.8	51664.1	60113.9
Q9HTC9	Q9HTC9	PA5437	Probable transcriptional regulator	Q9HTC9	Q9HTC9_PSEAE	>tr|Q9HTC9|Q9HTC9_PSEAE Probable transcriptional regulator OS=Pseudomonas aeruginosa (strain ATCC 15692 / DSM 22644 / CIP 104116 / JCM 14847 / LMG 12228 / 1C / PRS 101 / PAO1) OX=208964 GN=PA5437 PE=3 SV=1	34642.2	25979.9	23547.4	23426.5	23859.1	20311.3	13865.6	11878	9234.06	14464.8	13266.5	19234.7	11939	17915.8	15236.5	15904.7	22452.1	15403.8	15364.4	14201.2	15032.6	19304.1	15585.8	15888.2	17271.7	20416.6	17060.6	11117.7	15124	12316.3	15044.2	14457.4	11941.9	13495.8	18188.7	21594.7	17375.9	11354.1	16090.4	15598.2
Q9HTD0	Q9HTD0	PA5436	Biotin carboxylase	Q9HTD0	Q9HTD0_PSEAE	>tr|Q9HTD0|Q9HTD0_PSEAE Biotin carboxylase OS=Pseudomonas aeruginosa (strain ATCC 15692 / DSM 22644 / CIP 104116 / JCM 14847 / LMG 12228 / 1C / PRS 101 / PAO1) OX=208964 GN=PA5436 PE=4 SV=1	51848.1	540948	636329	611323	621026	585332	562740	423984	298651	458336	407035	545546	568299	417040	485109	663784	518716	407789	539175	340804	192661	576864	621322	456154	349026	463823	609135	272848	346036	322857	396855	539728	413099	423781	565936	424906	660712	465379	434999	312693
Q9HTD1	Q9HTD1	PA5435	Probable transcarboxylase subunit	Q9HTD1	Q9HTD1_PSEAE	>tr|Q9HTD1|Q9HTD1_PSEAE Probable transcarboxylase subunit OS=Pseudomonas aeruginosa (strain ATCC 15692 / DSM 22644 / CIP 104116 / JCM 14847 / LMG 12228 / 1C / PRS 101 / PAO1) OX=208964 GN=PA5435 PE=4 SV=1	66095.6	516728	533747	504371	520813	512309	441089	327274	288181	410532	418705	617025	455978	495278	451055	665627	443822	370745	414383	358145	315287	481287	681603	429717	312931	442115	514426	283732	358909	337919	374181	495069	361345	349701	529038	317491	504839	406061	524256	309092
Q9HTD2	Q9HTD2	mtr	Aromatic amino acid permease	Q9HTD2	Q9HTD2_PSEAE	>tr|Q9HTD2|Q9HTD2_PSEAE Aromatic amino acid permease OS=Pseudomonas aeruginosa (strain ATCC 15692 / DSM 22644 / CIP 104116 / JCM 14847 / LMG 12228 / 1C / PRS 101 / PAO1) OX=208964 GN=mtr PE=3 SV=1	44755.7	7071.21	11196.5	8705.9	13688.4	11654.8	7284.31	9847.98	6294.46	8424.31	16263.7	20093.3	18456.9	9173.98	19302.7	8514.27	15466.6	12788	10644.7	14537.7	16269.8	12708.6	9297.11	12640.6	7969.43	11368.6	6630.91	8920.24	12056.1	6460.17	11144.7	6662.03	6360.16	6029.83	6432.72	4595.31	7991.82	5123.12	548.769	8902.58
Q9HTD3	Q9HTD3	PA5433	N-acetyltransferase domain-containing protein	Q9HTD3	Q9HTD3_PSEAE	>tr|Q9HTD3|Q9HTD3_PSEAE N-acetyltransferase domain-containing protein OS=Pseudomonas aeruginosa (strain ATCC 15692 / DSM 22644 / CIP 104116 / JCM 14847 / LMG 12228 / 1C / PRS 101 / PAO1) OX=208964 GN=PA5433 PE=4 SV=1	25584	10541.9	18752.5	17242.1	12827.4	12778.4	1670.27	17672.6	6119.82	8469.53	6450.04	8333.57	7852.44	6802.37	4155.67	9935.66	4792.26	5957.17	10659.3	14064.8	334.99	13616.3	16142.5	9610.16	8601.69	10923	17050.1	10827.3	10697.6	10455.7	7473.16	15138.8	8477.64	14218.6	11017.2	5655.63	21971.5	17554	13900.4	6053.29
Q9HTD4	Q9HTD4	PA5432	Probable acetyltransferase	Q9HTD4	Q9HTD4_PSEAE	>tr|Q9HTD4|Q9HTD4_PSEAE Probable acetyltransferase OS=Pseudomonas aeruginosa (strain ATCC 15692 / DSM 22644 / CIP 104116 / JCM 14847 / LMG 12228 / 1C / PRS 101 / PAO1) OX=208964 GN=PA5432 PE=4 SV=1	17009.2	32663.4	40797.9	39458.7	40714.2	43440.8	2641.39	24557.4	21797.1	15408.1	18573.3	19938.7	8603.74	26319.9	18147.8	12155	16389.9	12647.1	36960.9	20457.9	9339.61	18763.4	19358.4	20676.4	15807.1	35443.3	16751	17801	9591.77	12670.1	13989.9	22908.7	17107.7	34417.6	25093.4	16455.7	29077.9	27217	21126.6	20967.4
Q9HTD5	Q9HTD5	PA5431	Probable transcriptional regulator	Q9HTD5	Q9HTD5_PSEAE	>tr|Q9HTD5|Q9HTD5_PSEAE Probable transcriptional regulator OS=Pseudomonas aeruginosa (strain ATCC 15692 / DSM 22644 / CIP 104116 / JCM 14847 / LMG 12228 / 1C / PRS 101 / PAO1) OX=208964 GN=PA5431 PE=3 SV=1	53435.1	3909.32	4298.15	4194.66	3509.24	1983.19	61.3849	343.531	2292.98	2830.21	2835.49	3519.52	3519.27	1777.43	3559.57	2206.92	5412.47	4145.98	1282	3908.5	141.346	5813.18	5879.59	2218.01	2212.33	7637.52	2583.48	3739.86	3215.96	1512.17	3303.99	1551.96	2367.11	960.229	4569.69	2558.42	400.187	2212.54	3820.62	3547.07
Q9HTD6	Q9HTD6	PA5430	Uncharacterized protein	Q9HTD6	Q9HTD6_PSEAE	>tr|Q9HTD6|Q9HTD6_PSEAE Uncharacterized protein OS=Pseudomonas aeruginosa (strain ATCC 15692 / DSM 22644 / CIP 104116 / JCM 14847 / LMG 12228 / 1C / PRS 101 / PAO1) OX=208964 GN=PA5430 PE=3 SV=1	42388.2	76460.4	68422.9	60990.1	71512.6	73593.1	50834.1	42662.1	36518.9	36658.8	43464.5	61697.3	47291.4	47810.3	37695.3	62090.6	32217	62834.7	18893.2	100793	43257.8	48035.1	58773.6	40937.7	38098.9	44573.3	40433.3	37481.6	45859.7	32960.4	37660.7	56458.8	29567.3	35394.9	31827.4	71192.7	25459.5	30892.1	50208.5	43750.9
Q9HTD7	Q9HTD7	aspA	Aspartate ammonia-lyase	Q9HTD7	ASPA_PSEAE	>sp|Q9HTD7|ASPA_PSEAE Aspartate ammonia-lyase OS=Pseudomonas aeruginosa (strain ATCC 15692 / DSM 22644 / CIP 104116 / JCM 14847 / LMG 12228 / 1C / PRS 101 / PAO1) OX=208964 GN=aspA PE=1 SV=1	51069.9	265278	297401	275987	289185	301438	298792	298160	402298	337220	265673	218125	296109	247013	275428	253412	363759	226201	335248	145397	130554	310089	301140	344317	253543	415185	376588	295983	191879	433594	278016	304452	310197	321456	339018	313716	167167	366622	323922	266953
Q9HTD8	Q9HTD8	PA5428	Probable transcriptional regulator	Q9HTD8	Q9HTD8_PSEAE	>tr|Q9HTD8|Q9HTD8_PSEAE Probable transcriptional regulator OS=Pseudomonas aeruginosa (strain ATCC 15692 / DSM 22644 / CIP 104116 / JCM 14847 / LMG 12228 / 1C / PRS 101 / PAO1) OX=208964 GN=PA5428 PE=3 SV=1	33477.7	49508.3	45229	43834.6	47640.9	50312.7	45034.5	46260.3	55444.7	46282.7	36433.6	30354.8	52573.8	35307.4	31916.5	30226.6	34702.7	44904.5	41689.7	24044.5	26884.8	29401.9	42768	36605.4	55498.2	36080.5	38890.2	44252.9	25705.6	51259.6	32554.7	36880.5	37077	44009.2	34371	56532.3	29382.7	38153.2	41761.8	39039.8
Q9HTD9	Q9HTD9	adhA	alcohol dehydrogenase	Q9HTD9	Q9HTD9_PSEAE	>tr|Q9HTD9|Q9HTD9_PSEAE alcohol dehydrogenase OS=Pseudomonas aeruginosa (strain ATCC 15692 / DSM 22644 / CIP 104116 / JCM 14847 / LMG 12228 / 1C / PRS 101 / PAO1) OX=208964 GN=adhA PE=1 SV=1	35911.3	729567	909240	848065	896013	928480	656865	724560	681643	801146	719191	532108	474104	625701	543292	579773	411644	430276	888987	296437	373702	591674	640486	462258	309550	711396	727288	701971	388197	891656	495116	673150	746192	676581	535582	99862	150344	732173	551362	578182
Q9HTE1	Q9HTE1	PA5423	DUF3299 domain-containing protein	Q9HTE1	Q9HTE1_PSEAE	>tr|Q9HTE1|Q9HTE1_PSEAE DUF3299 domain-containing protein OS=Pseudomonas aeruginosa (strain ATCC 15692 / DSM 22644 / CIP 104116 / JCM 14847 / LMG 12228 / 1C / PRS 101 / PAO1) OX=208964 GN=PA5423 PE=4 SV=1	20002.2	11225.4	15965.2	15692.4	14974.2	16138.9	14240.2	24714.8	54451.9	46733.8	44541.6	33588.6	35418.6	49622.8	31141.8	12395.7	35509	14617.5	63455.6	25725.8	68393.2	25698.7	27125.6	24205.4	28792.9	15285.7	16497.2	29897	39450.3	35517.2	35337.8	21463.8	63180.7	36172.4	13552.4	29321.8	19712.9	35810.6	15609.6	20880.5
Q9HTE2	Q9HTE2	PA5422	Putative glucose-6-phosphate 1-epimerase	Q9HTE2	Q9HTE2_PSEAE	>tr|Q9HTE2|Q9HTE2_PSEAE Putative glucose-6-phosphate 1-epimerase OS=Pseudomonas aeruginosa (strain ATCC 15692 / DSM 22644 / CIP 104116 / JCM 14847 / LMG 12228 / 1C / PRS 101 / PAO1) OX=208964 GN=PA5422 PE=3 SV=1	36139	177352	180671	174014	168542	180667	172666	193225	218246	175431	228930	176846	177805	187334	144152	126119	124852	225346	236318	127525	154170	179522	123960	168618	137186	237757	162137	202132	134265	269278	229743	99098.1	205300	182279	93771.4	324727	126310	290988	100629	177010
Q9HTE3	Q9HTE3	fdhA	Glutathione-independent formaldehyde dehydrogenase	Q9HTE3	FALDH_PSEAE	>sp|Q9HTE3|FALDH_PSEAE Glutathione-independent formaldehyde dehydrogenase OS=Pseudomonas aeruginosa (strain ATCC 15692 / DSM 22644 / CIP 104116 / JCM 14847 / LMG 12228 / 1C / PRS 101 / PAO1) OX=208964 GN=fdhA PE=3 SV=1	42008.1	207271	244658	217501	244052	230299	504753	113326	75127.7	105252	59635.3	23929.9	232598	149243	92997.6	154129	12283.1	36503.9	103181	79117.5	59761.3	167947	99630.2	196976	21098.2	201770	125445	75069.2	6502.58	93426.2	52930.1	197430	45187	73113.2	13382	57440.3	6971.37	73334.9	38273.9	24233.5
Q9HTE4	Q9HTE4	purU2	Formyltetrahydrofolate deformylase	Q9HTE4	Q9HTE4_PSEAE	>tr|Q9HTE4|Q9HTE4_PSEAE Formyltetrahydrofolate deformylase OS=Pseudomonas aeruginosa (strain ATCC 15692 / DSM 22644 / CIP 104116 / JCM 14847 / LMG 12228 / 1C / PRS 101 / PAO1) OX=208964 GN=purU2 PE=3 SV=1	32288.8	43378.6	43202.2	42550.6	41212.4	48226.8	68016.1	20611.3	18178.3	21974.9	15977.9	16025.9	45176.8	25657.2	17098.7	29088.1	7453.45	8893.67	24589.1	13918.7	13028.3	42523.4	19136.3	38353.6	8694.14	25552.1	22281.5	16665.3	1704.84	19344.7	11657.8	35566.9	12375.3	14785.7	21506.9	12789.1	6767.28	12623.1	7541.61	15522.8
Q9HTE5	Q9HTE5	soxG	Sarcosine oxidase gamma subunit	Q9HTE5	Q9HTE5_PSEAE	>tr|Q9HTE5|Q9HTE5_PSEAE Sarcosine oxidase gamma subunit OS=Pseudomonas aeruginosa (strain ATCC 15692 / DSM 22644 / CIP 104116 / JCM 14847 / LMG 12228 / 1C / PRS 101 / PAO1) OX=208964 GN=soxG PE=4 SV=1	22952.2	41234.2	50955.1	57063.5	57800.6	50443.8	98641.1	33651.7	10977.6	17548.1	18253.5	2877.37	40745.6	39222.7	26002.9	48077.7	3653.48	24707.1	26613.8	14630.8	11590.1	52391.1	13914.3	77501	13705.9	54452.2	26511.3	27579.6	2584.8	16533.1	17704	44568.5	12575.3	14357.5	8591.96	16115.5	3854.02	12710.1	12315.4	6229.32
Q9HTE6	Q9HTE6	soxA	Sarcosine oxidase alpha subunit	Q9HTE6	Q9HTE6_PSEAE	>tr|Q9HTE6|Q9HTE6_PSEAE Sarcosine oxidase alpha subunit OS=Pseudomonas aeruginosa (strain ATCC 15692 / DSM 22644 / CIP 104116 / JCM 14847 / LMG 12228 / 1C / PRS 101 / PAO1) OX=208964 GN=soxA PE=3 SV=1	109412	89854.7	87438.4	87167.6	88890	90190.7	188068	44085.9	13914.9	33947.4	19194.3	6913.77	95902.2	57499.6	45531.4	87881.7	10645.8	23242.4	28169.1	42482.8	19684.8	68427.4	28041.2	104545	9333.68	73480.4	52746.8	38131.7	6801.92	28875.6	29758.3	90349.9	21423.1	29794.9	9619.84	28512.9	4651.3	24252	21097.1	10283.9
Q9HTE7	Q9HTE7	soxD	Sarcosine oxidase delta subunit	Q9HTE7	Q9HTE7_PSEAE	>tr|Q9HTE7|Q9HTE7_PSEAE Sarcosine oxidase delta subunit OS=Pseudomonas aeruginosa (strain ATCC 15692 / DSM 22644 / CIP 104116 / JCM 14847 / LMG 12228 / 1C / PRS 101 / PAO1) OX=208964 GN=soxD PE=4 SV=1	12136.6	43619.1	42032.6	43228.7	35704.4	45173.9	1738.92	28139.7	14896.4	5807.46	8190.87	967.152	19791.3	21338.9	6088.73	20225.1	17422.2	18353.7	28644.4	10490.4	9084.96	25314.1	24726.9	52527.9	7553.47	26415.4	19715.8	4795.54	12200.7	11507.7	6244.91	44802	25781.5	3017.37	7654.27	3966.61	20999.8	5989.56	5314.87	5033.55
Q9HTE8	Q9HTE8	soxB	Sarcosine oxidase subunit beta	Q9HTE8	Q9HTE8_PSEAE	>tr|Q9HTE8|Q9HTE8_PSEAE Sarcosine oxidase subunit beta OS=Pseudomonas aeruginosa (strain ATCC 15692 / DSM 22644 / CIP 104116 / JCM 14847 / LMG 12228 / 1C / PRS 101 / PAO1) OX=208964 GN=soxB PE=3 SV=1	45143.2	105360	128658	123326	125371	113184	242535	66084.9	18712.6	32853.3	18349.7	7607.45	95917.7	52606.5	48504.3	105357	10296.4	19862.8	38776.5	30561	13643.3	77356.1	33624	150717	11628.2	95197.2	67380.2	40737.1	6795.17	30788.7	39985.2	83500.1	26678.1	30514.2	14798.1	32076.9	4320.02	31854.6	16482.3	12429.7
Q9HTE9	Q9HTE9	glyA1	Serine hydroxymethyltransferase 1	Q9HTE9	GLYA1_PSEAE	>sp|Q9HTE9|GLYA1_PSEAE Serine hydroxymethyltransferase 1 OS=Pseudomonas aeruginosa (strain ATCC 15692 / DSM 22644 / CIP 104116 / JCM 14847 / LMG 12228 / 1C / PRS 101 / PAO1) OX=208964 GN=glyA1 PE=3 SV=1	44699.8	135332	146523	141165	140607	153895	152544	73635.3	59891.1	62317	41933.4	5646	110613	66461.2	62040	68951.4	23254.3	32210.7	64987.6	54365.3	47568.5	121669	52732.7	104672	35046.4	97175.8	71377	73976.3	20091.4	87147.5	62733	129061	52767.4	73645.9	28229.6	46913.8	3525.77	56923	37082.2	70237.6
Q9HTF0	Q9HTF0	PA5414	Secreted protein	Q9HTF0	Q9HTF0_PSEAE	>tr|Q9HTF0|Q9HTF0_PSEAE Secreted protein OS=Pseudomonas aeruginosa (strain ATCC 15692 / DSM 22644 / CIP 104116 / JCM 14847 / LMG 12228 / 1C / PRS 101 / PAO1) OX=208964 GN=PA5414 PE=4 SV=1	22546.8	137221	153546	141146	145238	126250	141235	103491	78030.2	87200.8	106815	104613	106506	116272	112645	143749	142715	125707	65965	102703	113342	94356.9	102120	133616	140915	174025	136745	110950	127149	112023	119908	126762	131020	98091.4	158708	175135	138988	119671	143850	114616
Q9HTF1	Q9HTF1	ltaE	Low specificity L-threonine aldolase	Q9HTF1	LTAE_PSEAE	>sp|Q9HTF1|LTAE_PSEAE Low specificity L-threonine aldolase OS=Pseudomonas aeruginosa (strain ATCC 15692 / DSM 22644 / CIP 104116 / JCM 14847 / LMG 12228 / 1C / PRS 101 / PAO1) OX=208964 GN=ltaE PE=3 SV=1	38213.3	826371	849870	852189	909570	876622	546420	657635	919289	958338	759476	590986	657888	747945	617949	583260	691699	421101	745596	512099	494376	619508	539612	541550	531458	701261	552380	645260	592628	884984	826893	784229	682525	822846	571883	844639	829261	863878	516833	790916
Q9HTF2	Q9HTF2	PA5412	Ferredoxin	Q9HTF2	Q9HTF2_PSEAE	>tr|Q9HTF2|Q9HTF2_PSEAE Ferredoxin OS=Pseudomonas aeruginosa (strain ATCC 15692 / DSM 22644 / CIP 104116 / JCM 14847 / LMG 12228 / 1C / PRS 101 / PAO1) OX=208964 GN=PA5412 PE=4 SV=1	93324.9	14981.2	16378.7	15254	15991.7	17759.5	12891.3	8057.85	7251.36	7997.16	8562.42	11441.5	8964.83	2762.17	12348.5	26185.4	11979	14277.1	11479.6	15596.7	7257.38	2808.55	7638.21	17867.5	23387.1	3376.35	16935.3	10616.8	11633.1	6512.44	8190.29	16388.5	5747.42	5992.99	16525.7	6303.47	11459.1	8744.32	10641.6	7754.13
Q9HTF3	Q9HTF3	gbcB	Glycine betaine monooxygenase reductase subunit	Q9HTF3	GBMOR_PSEAE	>sp|Q9HTF3|GBMOR_PSEAE Glycine betaine monooxygenase reductase subunit OS=Pseudomonas aeruginosa (strain ATCC 15692 / DSM 22644 / CIP 104116 / JCM 14847 / LMG 12228 / 1C / PRS 101 / PAO1) OX=208964 GN=gbcB PE=2 SV=1	40535.4	120478	162812	146473	170712	170917	222272	75546.9	42570	54326.3	21334.8	4594.1	119613	51089	34121.8	95887.6	11367.2	16337.7	20646.8	36692.9	44422.6	64058.1	48886.6	96451.1	12829.1	84315.4	63713.7	41317.3	5100.01	55938.1	43025.8	88604.2	35743.9	47074.2	16633.4	84165.9	5022.27	40654.1	10973.5	7951.98
Q9HTF4	Q9HTF4	gbcA	Glycine betaine monooxygenase oxygenase subunit	Q9HTF4	GBMOO_PSEAE	>sp|Q9HTF4|GBMOO_PSEAE Glycine betaine monooxygenase oxygenase subunit OS=Pseudomonas aeruginosa (strain ATCC 15692 / DSM 22644 / CIP 104116 / JCM 14847 / LMG 12228 / 1C / PRS 101 / PAO1) OX=208964 GN=gbcA PE=2 SV=1	48666.4	216527	244888	244770	265626	263522	320875	105515	59100.9	81796.4	34828.7	18284.2	114064	88374.1	58185.2	153155	14962.1	50231.1	55356.3	85633.7	64554.9	84627.9	96858.3	170727	31162.4	153106	98758.9	119966	13320.4	88410.1	79922.2	170550	65498.8	71214.4	25893.7	25661.6	10185.6	72135.7	27488.4	35008.5
Q9HTF5	Q9HTF5	PA5409	HdeD family acid-resistance protein	Q9HTF5	Q9HTF5_PSEAE	>tr|Q9HTF5|Q9HTF5_PSEAE HdeD family acid-resistance protein OS=Pseudomonas aeruginosa (strain ATCC 15692 / DSM 22644 / CIP 104116 / JCM 14847 / LMG 12228 / 1C / PRS 101 / PAO1) OX=208964 GN=PA5409 PE=4 SV=1	19888.1	24056	31420.5	21395	31786	25213.4	10293.7	14457.3	17419.8	16722.5	19555.5	20466	12109.5	25781.7	12147	2281.32	5672.64	39726.4	26067.7	26917.6	46935	16552.9	18181.5	9608.19	8146.69	12435	8957.92	9161.27	11034.5	8731.11	17058.1	NaN	20652.8	17705.9	3189.64	9444.48	9455.58	17383.6	11251	21845.3
Q9HTF7	Q9HTF7	PA5407	Uncharacterized protein	Q9HTF7	Q9HTF7_PSEAE	>tr|Q9HTF7|Q9HTF7_PSEAE Uncharacterized protein OS=Pseudomonas aeruginosa (strain ATCC 15692 / DSM 22644 / CIP 104116 / JCM 14847 / LMG 12228 / 1C / PRS 101 / PAO1) OX=208964 GN=PA5407 PE=3 SV=1	10291.7	NaN	138.755	NaN	NaN	NaN	NaN	271.087	NaN	34.5644	227.472	NaN	269.985	347.699	525.296	330.385	582.608	29.6094	0.555089	NaN	1319.51	NaN	257.393	75.7865	NaN	73.2549	NaN	594.609	120.899	465.998	478.762	215.038	0.288968	NaN	427.483	1432.53	60.2757	187.512	633.788	NaN
Q9HTF8	Q9HTF8	PA5406	Cell division protein ZapB	Q9HTF8	Q9HTF8_PSEAE	>tr|Q9HTF8|Q9HTF8_PSEAE Cell division protein ZapB OS=Pseudomonas aeruginosa (strain ATCC 15692 / DSM 22644 / CIP 104116 / JCM 14847 / LMG 12228 / 1C / PRS 101 / PAO1) OX=208964 GN=PA5406 PE=4 SV=1	12444.8	8925.85	8781.48	9707.45	9654.46	14506	3999.45	7016.21	2556.45	12148	15936.7	6209.82	31318.3	14716.6	33930.5	533.025	72786.9	4205.33	28.8181	18051.9	990.932	176.521	10442.4	16333.6	33638.2	31528.6	8777.11	32070.7	31647.3	14921.9	32606.1	39592.7	174.201	10192.2	81819.9	93753.5	5289.55	10994.7	20268.6	14667.4
Q9HTG0	Q9HTG0	PA5404	Transmembrane protein	Q9HTG0	Q9HTG0_PSEAE	>tr|Q9HTG0|Q9HTG0_PSEAE Transmembrane protein OS=Pseudomonas aeruginosa (strain ATCC 15692 / DSM 22644 / CIP 104116 / JCM 14847 / LMG 12228 / 1C / PRS 101 / PAO1) OX=208964 GN=PA5404 PE=4 SV=1	14945.7	5686.09	3759.63	4201.08	4035.92	5669.27	2073.07	4136.24	5441.72	7468.91	4613.1	4577.92	4645.9	4044.53	5137.85	8289.06	9634.98	2795.31	2322.38	4000.65	2647.82	2342.69	13610.3	6871.38	5698.53	3810.65	9942.02	3998.29	13695.6	5676.15	15529	4723.01	3944.29	5237.54	14508.1	7960.96	3216	5472.08	12864.1	4669.73
Q9HTG1	Q9HTG1	PA5403	Probable transcriptional regulator	Q9HTG1	Q9HTG1_PSEAE	>tr|Q9HTG1|Q9HTG1_PSEAE Probable transcriptional regulator OS=Pseudomonas aeruginosa (strain ATCC 15692 / DSM 22644 / CIP 104116 / JCM 14847 / LMG 12228 / 1C / PRS 101 / PAO1) OX=208964 GN=PA5403 PE=4 SV=1	7569.94	10626.2	6691.83	8502.3	7526.31	9284.36	8640.54	4775.01	5381.61	7899.74	5828.6	3417.58	8026.62	8966.46	7356.65	9102.9	6609.49	6727.41	994.036	4217.29	229.719	130.857	5579.13	3599.27	6710.35	6192.15	3840.94	6817.66	5301.56	7723.22	8234.16	7853.45	3600.68	4816.84	5040.67	2869.86	5135.46	6814.05	8734.12	5773.96
Q9HTG3	Q9HTG3	PA5401	Electron transfer flavoprotein alpha/beta-subunit N-terminal domain-containing protein	Q9HTG3	Q9HTG3_PSEAE	>tr|Q9HTG3|Q9HTG3_PSEAE Electron transfer flavoprotein alpha/beta-subunit N-terminal domain-containing protein OS=Pseudomonas aeruginosa (strain ATCC 15692 / DSM 22644 / CIP 104116 / JCM 14847 / LMG 12228 / 1C / PRS 101 / PAO1) OX=208964 GN=PA5401 PE=3 SV=1	27298.4	23229.9	40557	36530.8	37818.2	34754.6	50810.9	21430	5711.78	7319.27	4039.82	4441.64	19482.7	10359.3	10211.6	20639.4	5373.24	3449.5	8934.98	7179.52	9809.4	13955.2	12113.3	27420.7	4934.84	21317.1	27082.2	8292.64	2918.54	8330.53	8403.62	19343.6	7391.79	10124.8	5276.89	6920.45	47.8918	6104.42	8729.96	4462.64
Q9HTG4	Q9HTG4	PA5400	Probable electron transfer flavoprotein alpha subunit	Q9HTG4	Q9HTG4_PSEAE	>tr|Q9HTG4|Q9HTG4_PSEAE Probable electron transfer flavoprotein alpha subunit OS=Pseudomonas aeruginosa (strain ATCC 15692 / DSM 22644 / CIP 104116 / JCM 14847 / LMG 12228 / 1C / PRS 101 / PAO1) OX=208964 GN=PA5400 PE=3 SV=1	34975.7	35189.7	38914.3	34348.9	33962.7	41510.6	52028.9	10885.9	7116.14	11887.5	4300.41	3528.91	17394.8	12460.9	8276.27	16425.2	3382.23	5078.78	6603.64	8741.39	3679.79	14503.5	13779.1	24659	4993.22	19336.9	11225.5	10659.2	3252.75	7674.25	9828.55	22124.3	6012.03	8245.35	3474.94	15378.7	2329.24	7165.29	3193.57	8131.25
Q9HTG5	Q9HTG5	dgcB	DgcB, Dimethylglycine catabolism	Q9HTG5	Q9HTG5_PSEAE	>tr|Q9HTG5|Q9HTG5_PSEAE DgcB, Dimethylglycine catabolism OS=Pseudomonas aeruginosa (strain ATCC 15692 / DSM 22644 / CIP 104116 / JCM 14847 / LMG 12228 / 1C / PRS 101 / PAO1) OX=208964 GN=dgcB PE=4 SV=1	70549	12559.1	12416.5	12847.6	12505	15612.5	9596.96	4674.15	4291.69	4194.61	3838.48	2496.9	4409.84	4853.9	3084.38	5874.43	4283.13	6142.27	3544.68	4419.25	3932.05	4826.23	5204.87	7968.51	4684.63	5996.72	4858.32	4692.39	2424.18	4558.59	4248.78	6150.01	1533.7	4256.3	5300.09	7165.9	2411.93	4341.37	4364.97	1509.5
Q9HTG6	Q9HTG6	dgcA	DgcA, Dimethylglycine catabolism	Q9HTG6	Q9HTG6_PSEAE	>tr|Q9HTG6|Q9HTG6_PSEAE DgcA, Dimethylglycine catabolism OS=Pseudomonas aeruginosa (strain ATCC 15692 / DSM 22644 / CIP 104116 / JCM 14847 / LMG 12228 / 1C / PRS 101 / PAO1) OX=208964 GN=dgcA PE=4 SV=1	75714.4	174303	192467	175646	186318	182582	296883	91223.5	47318.4	53690.8	29256.6	10936.8	126641	90495.8	48697.3	103113	11659	31246.9	54653.9	54758.8	33532.6	133865	84786.7	163151	22677.1	121005	90387.2	55030.7	6577.36	48321.3	48320.7	133760	35684.8	60565.2	18057.3	43954.4	5228.23	49879.2	29785.5	21333.9
Q9HTG7	Q9HTG7	PA5397	4-vinyl reductase 4VR domain-containing protein	Q9HTG7	Q9HTG7_PSEAE	>tr|Q9HTG7|Q9HTG7_PSEAE 4-vinyl reductase 4VR domain-containing protein OS=Pseudomonas aeruginosa (strain ATCC 15692 / DSM 22644 / CIP 104116 / JCM 14847 / LMG 12228 / 1C / PRS 101 / PAO1) OX=208964 GN=PA5397 PE=4 SV=1	19958.7	44313.9	53151.3	59804.1	63000	59937.6	49280.1	18091.1	3011.35	13443.4	6946.6	986.54	23127.3	20270.9	11129	21848.5	3041.21	5319.61	7355.8	4885.76	217.534	20216.4	15694.2	32402.8	5107.44	27507.2	16148.2	12440.8	42.1503	11674.9	11453.3	25327.7	6165.16	12921.4	2536.17	13675.5	147.072	9532.5	5863.42	5485.41
Q9HTG8	Q9HTG8	PA5396	Membrane dipeptidase	Q9HTG8	Q9HTG8_PSEAE	>tr|Q9HTG8|Q9HTG8_PSEAE Membrane dipeptidase OS=Pseudomonas aeruginosa (strain ATCC 15692 / DSM 22644 / CIP 104116 / JCM 14847 / LMG 12228 / 1C / PRS 101 / PAO1) OX=208964 GN=PA5396 PE=1 SV=1	36080.1	150283	166195	156921	155893	159984	263385	115162	42452.1	70953.8	31454.1	7979.99	127461	94409.6	45989.8	90414.6	6727.69	30811.4	65257.1	55650	47476.3	128173	74877.5	163036	19344.9	116810	90407.8	56675.6	5108.85	45119	42880.1	138987	37884.9	68447.7	15649	11022.5	2461.06	48870.4	25182.8	19071.7
Q9HTG9	Q9HTG9	PA5395	Nuclear transport factor 2 family protein	Q9HTG9	Q9HTG9_PSEAE	>tr|Q9HTG9|Q9HTG9_PSEAE Nuclear transport factor 2 family protein OS=Pseudomonas aeruginosa (strain ATCC 15692 / DSM 22644 / CIP 104116 / JCM 14847 / LMG 12228 / 1C / PRS 101 / PAO1) OX=208964 GN=PA5395 PE=4 SV=1	18513.6	3918.18	8279.24	6725.81	7819.33	5041.01	6344.64	66153.8	56073.5	21586.3	46367.4	18647	33577.8	24783.5	20479	6509.29	8204.47	28012.1	66610.3	14689.7	30213.8	38431.4	27137.4	28293.1	14294.3	17496.7	16661.2	29163.9	5658.87	78220.3	49120	7865.34	65948.4	47941.3	6976.61	13154.3	28020.9	39028.4	10377.9	39539.3
Q9HTH0	Q9HTH0	clsA	Cardiolipin synthase A	Q9HTH0	CLSA_PSEAE	>sp|Q9HTH0|CLSA_PSEAE Cardiolipin synthase A OS=Pseudomonas aeruginosa (strain ATCC 15692 / DSM 22644 / CIP 104116 / JCM 14847 / LMG 12228 / 1C / PRS 101 / PAO1) OX=208964 GN=clsA PE=3 SV=1	54557.9	21778.4	23548.4	19137.6	23058.3	24717.4	20093.4	24028.4	24952	24830.8	27901	23450.8	30560	21391.7	28964.9	12796.7	9901.64	22497.5	11197.7	18594.8	14226.4	20954.1	16626.5	14406	16146.4	8472.6	15625.9	20991.5	13346.7	20095.2	20057.1	12277.3	21436.2	23637.9	11500.4	7501.07	15769.4	25754.3	7498.81	19698.7
Q9HTH4	Q9HTH4	PA5390	Probable peptidic bond hydrolase	Q9HTH4	Q9HTH4_PSEAE	>tr|Q9HTH4|Q9HTH4_PSEAE Probable peptidic bond hydrolase OS=Pseudomonas aeruginosa (strain ATCC 15692 / DSM 22644 / CIP 104116 / JCM 14847 / LMG 12228 / 1C / PRS 101 / PAO1) OX=208964 GN=PA5390 PE=3 SV=1	41352.1	1257.51	NaN	NaN	1428.43	2227.94	1443.96	207.877	1984.87	2725.91	1967.9	2482.02	1021.24	2325.8	1830.9	1282.93	401.724	10467.1	1.67706	4002.43	7336.58	2803.53	2929.61	3959.75	1565.22	2861.37	462.687	3119.66	2016.79	3748.04	2765.8	2481.94	NaN	1113.52	3423.35	687.395	454.802	393.118	2387.83	4503.46
Q9HTH5	Q9HTH5	cdhR	HTH-type transcriptional regulator CdhR	Q9HTH5	CDHR_PSEAE	>sp|Q9HTH5|CDHR_PSEAE HTH-type transcriptional regulator CdhR OS=Pseudomonas aeruginosa (strain ATCC 15692 / DSM 22644 / CIP 104116 / JCM 14847 / LMG 12228 / 1C / PRS 101 / PAO1) OX=208964 GN=cdhR PE=1 SV=1	37078.4	11179.6	13430.6	12170.3	5685.07	10426.7	9646.75	2207.25	4526.42	4485.79	3382.16	5403.58	5075.15	6743.33	1576.83	6555.38	4350.79	8274.2	2541.93	9959.52	8150.26	4152.62	2428.63	9758.71	7442.32	5790.89	9291.54	5575.29	7271.63	2422.82	3564.81	3760.47	3386.5	314.999	7119.48	6844.94	3626.92	180.758	5465.38	4062.01
Q9HTH6	Q9HTH6	PA5388	ABC-type glycine betaine transport system substrate-binding domain-containing protein	Q9HTH6	Q9HTH6_PSEAE	>tr|Q9HTH6|Q9HTH6_PSEAE ABC-type glycine betaine transport system substrate-binding domain-containing protein OS=Pseudomonas aeruginosa (strain ATCC 15692 / DSM 22644 / CIP 104116 / JCM 14847 / LMG 12228 / 1C / PRS 101 / PAO1) OX=208964 GN=PA5388 PE=4 SV=1	33806.8	17004.7	15179.7	17548.7	15687.2	18337.2	42733.2	17275.1	18830.9	16792.9	1423.45	12280.3	32845.5	37915.5	22073.7	23227.9	9414.71	30480.5	33629.7	31605.6	45491.6	27546	8355.68	17084.5	1439.93	13886.5	18287.1	8641.73	452.749	15140.9	10923.5	16944.1	17864.4	21301.9	5147.22	26970.7	6907.92	14799.9	20784.4	11767.5
Q9HTH8	Q9HTH8	cdhA	L-carnitine dehydrogenase	Q9HTH8	LCDH_PSEAE	>sp|Q9HTH8|LCDH_PSEAE L-carnitine dehydrogenase OS=Pseudomonas aeruginosa (strain ATCC 15692 / DSM 22644 / CIP 104116 / JCM 14847 / LMG 12228 / 1C / PRS 101 / PAO1) OX=208964 GN=cdhA PE=1 SV=1	34694.7	9940.02	10107.8	8600.37	9207	8498.96	10210.6	7472.24	4099.54	2099.32	2246.17	718.254	6562.52	5471.15	4536.48	3206.07	1174.05	3689.36	1368.35	6992.24	2556.53	4276.44	6274.19	5282.98	635.166	2928.31	4431.49	925.637	743.271	NaN	3012.9	3363.25	1107.22	1958.05	978.053	366.26	1.07816	2452.84	505.901	560.787
Q9HTI2	Q9HTI2	PA5382	Probable transcriptional regulator	Q9HTI2	Q9HTI2_PSEAE	>tr|Q9HTI2|Q9HTI2_PSEAE Probable transcriptional regulator OS=Pseudomonas aeruginosa (strain ATCC 15692 / DSM 22644 / CIP 104116 / JCM 14847 / LMG 12228 / 1C / PRS 101 / PAO1) OX=208964 GN=PA5382 PE=3 SV=1	32260.8	NaN	6062.08	3216.8	3114.88	4817.28	4029.51	7405.88	4021.89	5658.21	287.899	NaN	3315.92	401.789	667.383	5536.23	2503.47	1165.68	3438.78	NaN	NaN	308.316	596.336	52.4878	2121.55	2389.6	NaN	4436.81	2575.79	4694.15	5357.56	3150.19	3029.34	7752.84	3315.33	9815.79	3889.96	1884.46	NaN	81.0123
Q9HTI3	Q9HTI3	PA5381	Uncharacterized protein	Q9HTI3	Q9HTI3_PSEAE	>tr|Q9HTI3|Q9HTI3_PSEAE Uncharacterized protein OS=Pseudomonas aeruginosa (strain ATCC 15692 / DSM 22644 / CIP 104116 / JCM 14847 / LMG 12228 / 1C / PRS 101 / PAO1) OX=208964 GN=PA5381 PE=4 SV=1	13347.2	1959.81	17716.3	15608.6	17034.2	12938.7	32764.8	13505.9	19272.4	23113	7174.68	490.972	28120.5	5439.75	8467.55	6521.79	394.884	2466.58	7554.9	2465.34	3.52822	9485.32	1867.31	15322.9	6718.17	12555.8	13838.5	13407.3	1017.89	14365	14119.7	15974.2	16766.1	5653.4	1549.61	18316.6	4443.72	13230	1139.07	3787.86
Q9HTI4	Q9HTI4	gbdR	HTH-type transcriptional regulator GbdR	Q9HTI4	GBDR_PSEAE	>sp|Q9HTI4|GBDR_PSEAE HTH-type transcriptional regulator GbdR OS=Pseudomonas aeruginosa (strain ATCC 15692 / DSM 22644 / CIP 104116 / JCM 14847 / LMG 12228 / 1C / PRS 101 / PAO1) OX=208964 GN=gbdR PE=1 SV=1	41000.1	3071.67	3537.3	3764.78	3573.96	4156.77	2380.13	7162.88	2318.77	2795.41	226357	3739.62	11645	1647.02	9471.81	3607.49	9578.47	12224.4	4648.72	775.78	3554.89	10624.7	416.253	2754.15	25955.8	2683.01	8740.45	6315.09	7629.67	3065.62	1380.52	7243.82	1027.16	6230.11	3157.9	11085.6	2930.16	9546.96	8606.7	5412.08
Q9HTI5	Q9HTI5	sdaB	L-serine dehydratase	Q9HTI5	Q9HTI5_PSEAE	>tr|Q9HTI5|Q9HTI5_PSEAE L-serine dehydratase OS=Pseudomonas aeruginosa (strain ATCC 15692 / DSM 22644 / CIP 104116 / JCM 14847 / LMG 12228 / 1C / PRS 101 / PAO1) OX=208964 GN=sdaB PE=3 SV=1	49217.3	4170.95	6016.57	4941.67	6955.56	6353.33	11779.9	2584.69	5229.15	3126.38	1319.79	89.1745	5482.13	3137.44	1317.86	3624.79	1555.65	426.27	579.019	850.869	47.7592	7311.63	449.542	5314.86	1495.14	4340.41	3373.93	2263.04	43.1017	3938.95	4166.57	4501.53	2078.28	868.749	1900.93	5657.53	554.233	2347.32	1630.53	1409.67
Q9HTI6	Q9HTI6	PA5378	ABC-type glycine betaine transport system substrate-binding domain-containing protein	Q9HTI6	Q9HTI6_PSEAE	>tr|Q9HTI6|Q9HTI6_PSEAE ABC-type glycine betaine transport system substrate-binding domain-containing protein OS=Pseudomonas aeruginosa (strain ATCC 15692 / DSM 22644 / CIP 104116 / JCM 14847 / LMG 12228 / 1C / PRS 101 / PAO1) OX=208964 GN=PA5378 PE=4 SV=1	34427.3	27490	33963.8	29265.8	31061.4	29883.9	67094.4	58924.3	93414.7	71687.8	64449.7	37103.8	68948.1	61048.6	50469.7	71083.5	50019.9	80486.1	71637.9	67008.2	79076.9	59305.8	20353.7	53631.2	57446.5	37972.2	44401.7	60540.4	76253	73830.1	82950.5	72129.7	78048.8	61284.6	22947.9	145375	29293	36320.2	35455.1	16564.6
Q9HTI7	Q9HTI7	PA5377	Probable permease of ABC transporter	Q9HTI7	Q9HTI7_PSEAE	>tr|Q9HTI7|Q9HTI7_PSEAE Probable permease of ABC transporter OS=Pseudomonas aeruginosa (strain ATCC 15692 / DSM 22644 / CIP 104116 / JCM 14847 / LMG 12228 / 1C / PRS 101 / PAO1) OX=208964 GN=PA5377 PE=3 SV=1	30020	71956.3	47367.2	51530.7	41625	45899.7	49909	21762.2	29781.5	28049.2	19644.6	27287.1	19223.3	29359.1	21781.1	31145	35140.1	37923.3	23114	20630.5	14100.1	36841.2	9543.33	37815.1	20134.3	36514.3	35004.4	17851.5	26378.3	21068.7	22255.6	39191.3	27942.2	22066.2	33265.2	56027.1	13868.9	18385.8	32905.3	25958
Q9HTI8	Q9HTI8	PA5376	Probable ATP-binding component of ABC transporter	Q9HTI8	Q9HTI8_PSEAE	>tr|Q9HTI8|Q9HTI8_PSEAE Probable ATP-binding component of ABC transporter OS=Pseudomonas aeruginosa (strain ATCC 15692 / DSM 22644 / CIP 104116 / JCM 14847 / LMG 12228 / 1C / PRS 101 / PAO1) OX=208964 GN=PA5376 PE=4 SV=1	43721.7	94572.2	105227	87360.9	96472.7	105616	122785	67466.1	55945.8	59580.1	44724.1	35508.7	49907.9	42391.8	42217.8	92729.9	37916	46822.9	35767	55119.6	42158.3	38599.7	55366	77243.3	52855.6	68068.5	68395.9	69546.7	39763.2	74117.8	75395	101241	57745.6	52574.4	42420.9	168522	54500.9	58250.6	46124.8	42984.8
Q9HTJ0	Q9HTJ0	betI	HTH-type transcriptional regulator BetI	Q9HTJ0	BETI_PSEAE	>sp|Q9HTJ0|BETI_PSEAE HTH-type transcriptional regulator BetI OS=Pseudomonas aeruginosa (strain ATCC 15692 / DSM 22644 / CIP 104116 / JCM 14847 / LMG 12228 / 1C / PRS 101 / PAO1) OX=208964 GN=betI PE=3 SV=1	21860.9	56193.8	58710.4	52672.2	50661.9	65779.7	42598.8	31370.2	29999.6	37654.9	36066.8	134851	40685	26209.8	27815.7	28950	27782.4	32709.3	35557.4	20618.8	30523	35534.8	33301	32788.2	36045.4	38248.4	33832.6	25559.9	24060.6	30562.4	22871.3	32257.1	30843.7	25306.4	27765.9	47474.7	21646.9	22464.5	18860.9	34821.7
Q9HTJ1	Q9HTJ1	betB	NAD/NADP-dependent betaine aldehyde dehydrogenase	Q9HTJ1	BETB_PSEAE	>sp|Q9HTJ1|BETB_PSEAE NAD/NADP-dependent betaine aldehyde dehydrogenase OS=Pseudomonas aeruginosa (strain ATCC 15692 / DSM 22644 / CIP 104116 / JCM 14847 / LMG 12228 / 1C / PRS 101 / PAO1) OX=208964 GN=betB PE=1 SV=1	53332.5	418751	403337	415873	423191	423956	233313	245948	235705	272259	235930	5.84667e+06	223494	207668	247802	281310	606490	244426	185439	202194	187735	141142	249860	331710	312249	390143	348742	410518	573121	308004	544583	336991	526179	236375	426753	1.61395e+06	317794	334850	419243	406489
Q9HTJ2	Q9HTJ2	betA	Oxygen-dependent choline dehydrogenase	Q9HTJ2	BETA_PSEAE	>sp|Q9HTJ2|BETA_PSEAE Oxygen-dependent choline dehydrogenase OS=Pseudomonas aeruginosa (strain ATCC 15692 / DSM 22644 / CIP 104116 / JCM 14847 / LMG 12228 / 1C / PRS 101 / PAO1) OX=208964 GN=betA PE=3 SV=1	61836.8	141288	150474	152964	152821	150222	101100	68589.9	63719.2	84462.4	63032.2	6958.96	68514.8	44353.1	59754.7	102993	208016	49036.3	39893.1	62959.2	43911.4	48099.7	53562.1	92124.5	112577	138619	124103	115026	149944	81436.4	193493	103637	120393	43940.4	133940	539647	54066.3	80661.7	129924	109325
Q9HTJ3	Q9HTJ3	PA5371	HotDog ACOT-type domain-containing protein	Q9HTJ3	Q9HTJ3_PSEAE	>tr|Q9HTJ3|Q9HTJ3_PSEAE HotDog ACOT-type domain-containing protein OS=Pseudomonas aeruginosa (strain ATCC 15692 / DSM 22644 / CIP 104116 / JCM 14847 / LMG 12228 / 1C / PRS 101 / PAO1) OX=208964 GN=PA5371 PE=3 SV=1	14554.7	37509.1	79295.1	42759	73122.3	81964	119831	98257.1	113351	136297	116190	35726.7	128048	107371	80427	127238	61941.5	82162.2	26153.1	28941.2	797.323	105347	67782.6	89860.8	72860.5	82089.5	103063	104996	31251	205028	112127	96838.7	134050	100537	27327.1	45486.8	65028.6	170574	86088.2	75628.2
Q9HTJ4	Q9HTJ4	PA5370	Probable major facilitator superfamily (MFS) transporter	Q9HTJ4	Q9HTJ4_PSEAE	>tr|Q9HTJ4|Q9HTJ4_PSEAE Probable major facilitator superfamily (MFS) transporter OS=Pseudomonas aeruginosa (strain ATCC 15692 / DSM 22644 / CIP 104116 / JCM 14847 / LMG 12228 / 1C / PRS 101 / PAO1) OX=208964 GN=PA5370 PE=4 SV=1	47037.8	46128.5	43263.5	43825.9	42906.8	49993.9	23670	23888	16095.1	19033.8	18567.4	25839.6	24010.1	15874.3	18142.8	41599.7	12560.5	18292.2	23682.5	60289.1	18256.8	27297.3	30333.3	25186.5	10801.9	14948	19033.4	10688.9	25273.6	12322.7	20456.1	29467.4	14563.2	19590.7	20854.2	37485.1	17607.9	22115.3	28296.9	18202.7
Q9HTJ5	Q9HTJ5	pstA	Phosphate transport system permease protein PstA	Q9HTJ5	Q9HTJ5_PSEAE	>tr|Q9HTJ5|Q9HTJ5_PSEAE Phosphate transport system permease protein PstA OS=Pseudomonas aeruginosa (strain ATCC 15692 / DSM 22644 / CIP 104116 / JCM 14847 / LMG 12228 / 1C / PRS 101 / PAO1) OX=208964 GN=pstA PE=3 SV=1	61213.5	63849.6	65842.8	66184.7	61930.8	62069.3	97785.5	58992.7	24644.5	43935.6	49669	81537.1	71937.6	93359.4	94253.1	163574	16459.7	23628.3	78344.4	219340	101971	90740.6	65146	16078.3	27722.5	29085.1	25256.4	16626	23093.5	24747.9	25392	22795.8	15238.3	42080.2	32671.4	29653	32286.4	36627.6	27934.4	24295.9
Q9HTJ6	Q9HTJ6	PA5364	Probable two-component response regulator	Q9HTJ6	Q9HTJ6_PSEAE	>tr|Q9HTJ6|Q9HTJ6_PSEAE Probable two-component response regulator OS=Pseudomonas aeruginosa (strain ATCC 15692 / DSM 22644 / CIP 104116 / JCM 14847 / LMG 12228 / 1C / PRS 101 / PAO1) OX=208964 GN=PA5364 PE=4 SV=1	32401.4	83018.3	77337.3	70865.3	72879.7	91476.4	98233	122044	133951	115882	119228	85168.1	104903	113779	110999	77797.9	83943.8	154962	122761	96176.2	98568.4	75333	107414	112548	118096	77047.6	123394	124766	94319.8	135617	142606	121577	163731	112051	98588.8	70207.7	122550	120903	126624	126436
Q9HTJ7	Q9HTJ7	PA5363	Peptidase M23	Q9HTJ7	Q9HTJ7_PSEAE	>tr|Q9HTJ7|Q9HTJ7_PSEAE Peptidase M23 OS=Pseudomonas aeruginosa (strain ATCC 15692 / DSM 22644 / CIP 104116 / JCM 14847 / LMG 12228 / 1C / PRS 101 / PAO1) OX=208964 GN=PA5363 PE=4 SV=1	32808.7	15644.6	16409	20332.9	12750	13328.3	7125.56	78492.2	9463.93	44190.1	52534.4	56703.3	39821.5	33887.8	56145.9	43004.2	54751.4	44276.6	18166.7	33970.9	30967.5	56959.5	73834.9	58662.4	68289.7	41175.2	57798.6	77828.4	99784.1	71043.5	105657	62086	108782	50693.5	81026.2	95611.9	75824.3	70609.9	48915.9	63851.8
Q9HTJ8	Q9HTJ8	PA5362	HlyC/CorC family transporter	Q9HTJ8	Q9HTJ8_PSEAE	>tr|Q9HTJ8|Q9HTJ8_PSEAE HlyC/CorC family transporter OS=Pseudomonas aeruginosa (strain ATCC 15692 / DSM 22644 / CIP 104116 / JCM 14847 / LMG 12228 / 1C / PRS 101 / PAO1) OX=208964 GN=PA5362 PE=3 SV=1	49985.1	21412.9	23307.6	18290.1	20588.8	22061.9	21213.1	11058.9	11971.7	12773.1	12290.9	17808.9	15174.9	13679.2	14095.9	18530	16016.2	19423.7	15203.7	22872.6	12057.3	14691.8	12850.3	14928.7	18921.2	16878.4	15450.3	13404.1	15382.6	13732.4	13551.1	16643.6	12799.8	13097.1	16983.3	26152.5	17149.5	11605.6	13269.3	12196.9
Q9HTJ9	Q9HTJ9	PA5359	Lipoprotein	Q9HTJ9	Q9HTJ9_PSEAE	>tr|Q9HTJ9|Q9HTJ9_PSEAE Lipoprotein OS=Pseudomonas aeruginosa (strain ATCC 15692 / DSM 22644 / CIP 104116 / JCM 14847 / LMG 12228 / 1C / PRS 101 / PAO1) OX=208964 GN=PA5359 PE=4 SV=1	16471.6	15693	21287.1	19564.8	18847.5	23616.9	20082.6	49789.7	185634	248896	128228	44755.1	158382	120515	94113.2	8474.86	13612.6	99481.5	399480	27352.8	96338.7	123870	17707	35523.5	30804.6	21336.7	21915.2	53044.7	90403.9	123002	76308.3	19231.9	179168	68359.1	4652.14	9395.62	18827	41168.6	13310.1	33014.9
Q9HTK0	Q9HTK0	ubiA	4-hydroxybenzoate octaprenyltransferase	Q9HTK0	UBIA_PSEAE	>sp|Q9HTK0|UBIA_PSEAE 4-hydroxybenzoate octaprenyltransferase OS=Pseudomonas aeruginosa (strain ATCC 15692 / DSM 22644 / CIP 104116 / JCM 14847 / LMG 12228 / 1C / PRS 101 / PAO1) OX=208964 GN=ubiA PE=3 SV=1	33016.9	26052.3	16943.5	17401.7	15208.1	18168.6	12546.6	5829.32	9324.3	14955.2	7521.08	14792.2	8651.88	7975.69	6767.6	7918.51	6532.03	4037.83	3591.61	10084.2	4984.42	10861.5	8998.02	7810.41	6769.18	6288.87	4829.89	5425.98	3813.76	8568.89	9270.89	9216.17	8103.08	7761.78	12210.4	14555.6	5688.18	5557.28	6161.44	7214.59
Q9HTK1	Q9HTK1	ubiC	Probable chorismate pyruvate-lyase	Q9HTK1	UBIC_PSEAE	>sp|Q9HTK1|UBIC_PSEAE Probable chorismate pyruvate-lyase OS=Pseudomonas aeruginosa (strain ATCC 15692 / DSM 22644 / CIP 104116 / JCM 14847 / LMG 12228 / 1C / PRS 101 / PAO1) OX=208964 GN=ubiC PE=3 SV=1	19512	36669.9	40414.9	40619	35863.7	44770	30400.8	47622.5	55688.1	45160.8	61452.5	39165.9	45681.3	51525.5	62412.7	31150.8	85139.8	28159.8	29872.3	73344.6	15700.8	53957.7	11010.2	41953.6	62859.1	55313.8	42302.3	65623	39881.5	50625.2	75162.6	50553.8	79559.9	33091.6	32493.6	23503.8	33974.1	40767	44235.5	46688.1
Q9HTK2	Q9HTK2	glcC	Transcriptional regulator GlcC	Q9HTK2	Q9HTK2_PSEAE	>tr|Q9HTK2|Q9HTK2_PSEAE Transcriptional regulator GlcC OS=Pseudomonas aeruginosa (strain ATCC 15692 / DSM 22644 / CIP 104116 / JCM 14847 / LMG 12228 / 1C / PRS 101 / PAO1) OX=208964 GN=glcC PE=4 SV=1	28683.5	13284.8	15139.6	8104.25	10993.1	13424.6	16281.1	18581.8	17486.4	34013	20091.9	13290.5	22845.9	21591.7	19178.8	7900.67	8686.89	24280	22869.1	11779.1	25245.9	11103.7	17218	28248.5	16784.9	14127	13184.9	28038.9	23295.3	39914	24937.1	15141.8	19712.4	18558.9	4569.57	10788.9	10747.2	24470.1	17594.3	25182
Q9HTK3	Q9HTK3	glcD	Glycolate oxidase subunit GlcD	Q9HTK3	Q9HTK3_PSEAE	>tr|Q9HTK3|Q9HTK3_PSEAE Glycolate oxidase subunit GlcD OS=Pseudomonas aeruginosa (strain ATCC 15692 / DSM 22644 / CIP 104116 / JCM 14847 / LMG 12228 / 1C / PRS 101 / PAO1) OX=208964 GN=glcD PE=4 SV=1	53663.6	13540.9	15421.2	15197.1	14996	12908.4	23192.8	15834.3	13624.4	8437.97	6765.48	6763.42	9517.47	11612	11722.8	4118.57	2697.31	3138.04	197.626	8160.17	887.656	8397.39	17890.3	31637.6	17602.9	4091.52	26557.1	4538.51	3703.14	15540	9004.96	6495.61	3775.68	11299.5	3846.79	16713.8	2154.37	5326.27	10649.6	3237.17
Q9HTK4	Q9HTK4	glcE	Glycolate oxidase subunit GlcE	Q9HTK4	Q9HTK4_PSEAE	>tr|Q9HTK4|Q9HTK4_PSEAE Glycolate oxidase subunit GlcE OS=Pseudomonas aeruginosa (strain ATCC 15692 / DSM 22644 / CIP 104116 / JCM 14847 / LMG 12228 / 1C / PRS 101 / PAO1) OX=208964 GN=glcE PE=4 SV=1	38195.9	3681.79	2191.17	2946.46	3094.2	3127	7979.78	4209.07	2641.57	1543.66	2431.08	3941.22	5865.39	6991.63	6599.42	2718.75	280.502	2533.27	2.77498	3785.88	3736.47	797.361	6690.3	9791.07	7711.96	1206.6	5028.91	821.567	503.246	4936.07	2788.67	3237.99	970.231	3984.18	715.92	4264.29	66.1183	460.725	3839.42	1009.12
Q9HTK5	Q9HTK5	glcF	Glycolate oxidase iron-sulfur subunit	Q9HTK5	Q9HTK5_PSEAE	>tr|Q9HTK5|Q9HTK5_PSEAE Glycolate oxidase iron-sulfur subunit OS=Pseudomonas aeruginosa (strain ATCC 15692 / DSM 22644 / CIP 104116 / JCM 14847 / LMG 12228 / 1C / PRS 101 / PAO1) OX=208964 GN=glcF PE=4 SV=1	44740.1	9919.13	5310.2	6396.24	7109.48	9418.43	8928.56	6043.61	6292.5	13979.5	2762.37	988.092	5545.26	4969.2	4161.25	3866.45	6251.1	3518.3	164.893	1838.61	5145.44	3218.46	6129.07	7714.17	7533.96	2030.56	2847.85	2349.77	2339.91	13777.6	4804.28	5598.14	4072.89	5460.56	1474.65	12510.1	1119.36	6347.5	4086.35	6455.12
Q9HTK7	Q9HTK7	rubA1	Rubredoxin-1	Q9HTK7	RUBR1_PSEAE	>sp|Q9HTK7|RUBR1_PSEAE Rubredoxin-1 OS=Pseudomonas aeruginosa (strain ATCC 15692 / DSM 22644 / CIP 104116 / JCM 14847 / LMG 12228 / 1C / PRS 101 / PAO1) OX=208964 GN=rubA1 PE=1 SV=1	6276.16	28960.4	20784.7	26646	32974	35935.8	23936.6	56907.1	89456.4	65692.1	76885.4	58619.1	63715.2	62528.2	63928.7	29501.1	54543	31443.4	45027.6	57974.7	46703.1	51255.7	26915.7	44284.2	62754.7	41575.4	41229.3	63315.3	38693.4	62858.1	70789.5	55654.8	57026.7	34755.6	35269.4	51775	67587	52416.7	26291.4	43719.6
Q9HTK9	Q9HTK9	alkT	Rubredoxin-NAD(+) reductase	Q9HTK9	RURE_PSEAE	>sp|Q9HTK9|RURE_PSEAE Rubredoxin-NAD(+) reductase OS=Pseudomonas aeruginosa (strain ATCC 15692 / DSM 22644 / CIP 104116 / JCM 14847 / LMG 12228 / 1C / PRS 101 / PAO1) OX=208964 GN=alkT PE=1 SV=1	40617.9	222453	218782	214962	217691	215520	199900	164563	165296	209116	250054	192048	168368	206572	185885	128137	145155	151879	232292	126593	113685	190329	192186	194408	166556	145436	153613	219371	150271	260075	199426	114593	275107	189319	98543.6	126473	221019	165807	131551	172143
Q9HTL0	Q9HTL0	hupA	DNA-binding protein HU-alpha	Q9HTL0	DBHA_PSEAE	>sp|Q9HTL0|DBHA_PSEAE DNA-binding protein HU-alpha OS=Pseudomonas aeruginosa (strain ATCC 15692 / DSM 22644 / CIP 104116 / JCM 14847 / LMG 12228 / 1C / PRS 101 / PAO1) OX=208964 GN=hupA PE=3 SV=1	9695.17	378874	464540	405647	417350	456405	948033	651873	327623	395486	323665	342843	1.04638e+06	449099	538880	694267	235590	136380	152509	243641	452753	705848	1.01491e+06	651534	357041	310527	404709	285159	136711	395934	181424	663427	162911	630620	332077	75215.9	75022.8	17032.9	281593	186889
Q9HTL1	Q9HTL1	PA5347	Helicase	Q9HTL1	Q9HTL1_PSEAE	>tr|Q9HTL1|Q9HTL1_PSEAE Helicase OS=Pseudomonas aeruginosa (strain ATCC 15692 / DSM 22644 / CIP 104116 / JCM 14847 / LMG 12228 / 1C / PRS 101 / PAO1) OX=208964 GN=PA5347 PE=4 SV=1	14726.4	16779.4	18425.9	18977.5	19738.1	14713.6	19633.3	39871.2	34055.5	46511.6	32694.2	20667.6	31630.9	26062.4	24322.8	17379.8	20725.3	23048.4	31736.3	20409.2	26884.1	29283.6	21692	23707.1	12086.5	17346.9	18303.7	23987.3	24901.2	29816.6	27858.7	18206.2	24524	29952.9	21393.7	22798	21354	48718.1	13103.3	28579.3
Q9HTL2	Q9HTL2	PA5346	HDOD domain-containing protein	Q9HTL2	Q9HTL2_PSEAE	>tr|Q9HTL2|Q9HTL2_PSEAE HDOD domain-containing protein OS=Pseudomonas aeruginosa (strain ATCC 15692 / DSM 22644 / CIP 104116 / JCM 14847 / LMG 12228 / 1C / PRS 101 / PAO1) OX=208964 GN=PA5346 PE=4 SV=1	51427.4	215604	218485	215570	222765	219131	167501	153014	175982	172811	186412	137382	185219	168654	155332	116787	97633.3	199962	143227	223315	157487	144570	176711	158879	164166	143483	134814	155722	121661	171143	199265	147778	188373	174754	111745	113899	89650.7	182460	145897	161036
Q9HTL3	Q9HTL3	recG	ATP-dependent DNA helicase RecG	Q9HTL3	Q9HTL3_PSEAE	>tr|Q9HTL3|Q9HTL3_PSEAE ATP-dependent DNA helicase RecG OS=Pseudomonas aeruginosa (strain ATCC 15692 / DSM 22644 / CIP 104116 / JCM 14847 / LMG 12228 / 1C / PRS 101 / PAO1) OX=208964 GN=recG PE=3 SV=1	76178.9	68150.2	60434.4	63735.9	63630.8	67573.1	51564	48979.7	44862.9	54545.2	47462.4	51216	45994.8	49114.2	46416.1	48343.6	41493.7	66728.7	42001.5	52005.3	41614.6	29328.9	53686.2	58545.7	35213.8	57685.5	50769.5	54450	45592.6	51389.7	51271.7	51351.9	53801.8	51992.9	49630.6	47118.6	49845.2	48873.3	49499.9	52254.3
Q9HTL4	Q9HTL4	oxyR	OxyR	Q9HTL4	Q9HTL4_PSEAE	>tr|Q9HTL4|Q9HTL4_PSEAE OxyR OS=Pseudomonas aeruginosa (strain ATCC 15692 / DSM 22644 / CIP 104116 / JCM 14847 / LMG 12228 / 1C / PRS 101 / PAO1) OX=208964 GN=oxyR PE=1 SV=1	34295.6	275477	299024	292408	311762	332280	291488	356392	382463	339699	388412	294426	325648	379336	329480	250111	253920	417872	440463	303509	348375	226453	372737	356600	248907	293663	313549	349090	213737	420889	356282	353871	385863	336146	275123	374826	334186	403967	310630	326938
Q9HTL5	Q9HTL5	PA5343	NAD-dependent epimerase/dehydratase domain-containing protein	Q9HTL5	Q9HTL5_PSEAE	>tr|Q9HTL5|Q9HTL5_PSEAE NAD-dependent epimerase/dehydratase domain-containing protein OS=Pseudomonas aeruginosa (strain ATCC 15692 / DSM 22644 / CIP 104116 / JCM 14847 / LMG 12228 / 1C / PRS 101 / PAO1) OX=208964 GN=PA5343 PE=4 SV=1	30778.6	118321	136033	121179	126991	137521	88401	82353.4	114260	102864	115717	87468.8	96568.2	118257	109639	74166.2	114054	136746	90703	122032	86448.5	67108.3	50602.2	92666.1	110722	106312	88713.4	128952	75175.4	136472	178273	104921	151269	106547	76423	135137	108449	97240.4	93002.4	79775.9
Q9HTL8	Q9HTL8	PA5340	Lipoprotein	Q9HTL8	Q9HTL8_PSEAE	>tr|Q9HTL8|Q9HTL8_PSEAE Lipoprotein OS=Pseudomonas aeruginosa (strain ATCC 15692 / DSM 22644 / CIP 104116 / JCM 14847 / LMG 12228 / 1C / PRS 101 / PAO1) OX=208964 GN=PA5340 PE=4 SV=1	26140	46745.2	34928.3	32230.5	42241.7	42889.2	54965.3	62396	69718.3	45048.2	56426.1	51249.9	64138	34365.4	57772.7	61396.7	47691.4	64435.4	46585.6	49751.3	62446.8	45097.1	53933.7	43713.1	50096.6	46471.4	52267.6	50188.5	48338.8	56923.2	49344.3	49911	62811.6	51964.2	53227.7	61137.9	79851.5	62717.2	57663.3	57935.1
Q9HTL9	Q9HTL9	PA5339	RidA family protein	Q9HTL9	Q9HTL9_PSEAE	>tr|Q9HTL9|Q9HTL9_PSEAE RidA family protein OS=Pseudomonas aeruginosa (strain ATCC 15692 / DSM 22644 / CIP 104116 / JCM 14847 / LMG 12228 / 1C / PRS 101 / PAO1) OX=208964 GN=PA5339 PE=3 SV=1	13609.6	871718	855588	871958	870477	916254	905428	1.34404e+06	1.6591e+06	1.26255e+06	1.56531e+06	1.12798e+06	1.20945e+06	1.45856e+06	1427989	1.12195e+06	1.53373e+06	977928	1.8142e+06	1.01447e+06	1.02511e+06	1.69825e+06	1.22639e+06	1.0927e+06	1.06518e+06	1.25283e+06	1.13408e+06	1.41675e+06	1.50204e+06	1.60937e+06	1.57465e+06	1.30568e+06	1.82946e+06	1.27622e+06	1.14585e+06	2486533	1.33115e+06	1.36584e+06	1.10159e+06	1.40415e+06
Q9HTM0	Q9HTM0	spoT	guanosine-3',5'-bis(diphosphate) 3'-diphosphatase	Q9HTM0	Q9HTM0_PSEAE	>tr|Q9HTM0|Q9HTM0_PSEAE guanosine-3',5'-bis(diphosphate) 3'-diphosphatase OS=Pseudomonas aeruginosa (strain ATCC 15692 / DSM 22644 / CIP 104116 / JCM 14847 / LMG 12228 / 1C / PRS 101 / PAO1) OX=208964 GN=spoT PE=3 SV=1	78880.1	165308	163354	162829	158031	159232	140493	109037	130302	116333	114805	132940	124566	122575	129580	137963	115614	202017	128855	156689	135763	128076	126697	127276	122887	154523	132167	115140	120988	130170	128217	115512	124795	127361	112385	270533	171300	120622	132797	137935
Q9HTM1	Q9HTM1	rpoZ	DNA-directed RNA polymerase subunit omega	Q9HTM1	RPOZ_PSEAE	>sp|Q9HTM1|RPOZ_PSEAE DNA-directed RNA polymerase subunit omega OS=Pseudomonas aeruginosa (strain ATCC 15692 / DSM 22644 / CIP 104116 / JCM 14847 / LMG 12228 / 1C / PRS 101 / PAO1) OX=208964 GN=rpoZ PE=1 SV=1	9774.92	114651	149014	163230	140645	206638	188303	231416	219271	230640	174051	57331.9	158522	122602	178871	210029	217806	63704.8	67420.9	86218.6	26909.6	129808	122808	192823	218701	163164	156556	260311	133555	191179	261885	241040	203864	139964	304572	274526	238804	201532	85278.2	201606
Q9HTM2	Q9HTM2	gmk	Guanylate kinase	Q9HTM2	KGUA_PSEAE	>sp|Q9HTM2|KGUA_PSEAE Guanylate kinase OS=Pseudomonas aeruginosa (strain ATCC 15692 / DSM 22644 / CIP 104116 / JCM 14847 / LMG 12228 / 1C / PRS 101 / PAO1) OX=208964 GN=gmk PE=1 SV=1	23102.1	122247	107057	105453	100491	108476	121886	174398	183504	139957	187639	179044	167588	178853	193226	200570	220339	161855	207454	177293	199468	161991	140628	171929	145527	158450	164687	213027	218839	144134	189706	205916	168441	186164	226746	332351	187780	162670	162088	182073
Q9HTM3	Q9HTM3	PA5335	YicC family protein	Q9HTM3	Q9HTM3_PSEAE	>tr|Q9HTM3|Q9HTM3_PSEAE YicC family protein OS=Pseudomonas aeruginosa (strain ATCC 15692 / DSM 22644 / CIP 104116 / JCM 14847 / LMG 12228 / 1C / PRS 101 / PAO1) OX=208964 GN=PA5335 PE=3 SV=1	31708.3	76496.5	71184.6	75403.9	73305.4	79121.7	96215.4	120210	124951	137205	146284	136780	136662	147299	151425	117664	119234	168211	45303.3	100979	81253.3	91331.2	114298	128606	103662	115517	112057	138225	100225	61888.9	123813	144323	131915	121946	142390	149635	133335	139640	108466	131332
Q9HTM4	Q9HTM4	PA5333	DUF4870 domain-containing protein	Q9HTM4	Q9HTM4_PSEAE	>tr|Q9HTM4|Q9HTM4_PSEAE DUF4870 domain-containing protein OS=Pseudomonas aeruginosa (strain ATCC 15692 / DSM 22644 / CIP 104116 / JCM 14847 / LMG 12228 / 1C / PRS 101 / PAO1) OX=208964 GN=PA5333 PE=4 SV=1	13572.2	65651.9	59483.4	57441.6	57353.8	50367.7	43551.4	50219.9	11326.1	71215.4	56944.4	63003.9	50271	49097.6	57774.5	36204.9	14932.7	66905.6	41946.4	53705.6	81945.8	67376.9	46848.9	47427	35769.9	37366.4	32739.2	32845.6	21655.5	40123.6	36799.2	27731.3	44808.8	44161.9	28973.8	73697.6	20176.6	38452.1	34315.8	61636.7
Q9HTM5	Q9HTM5	PA5330	DUF4124 domain-containing protein	Q9HTM5	Q9HTM5_PSEAE	>tr|Q9HTM5|Q9HTM5_PSEAE DUF4124 domain-containing protein OS=Pseudomonas aeruginosa (strain ATCC 15692 / DSM 22644 / CIP 104116 / JCM 14847 / LMG 12228 / 1C / PRS 101 / PAO1) OX=208964 GN=PA5330 PE=4 SV=1	22434.4	37134.7	36421.4	34969.2	36562.5	36501	47806.2	47463.6	119126	79953.4	93259	77628.6	91503.1	80496.6	100194	99880.7	99334.5	62791.3	127909	72773.4	108352	49320.6	35088.4	46900.4	119471	25136.3	44148.4	77862.6	105950	63116.9	79986.8	70784.1	93869.2	72745.4	66192.2	45451.3	33137.7	35981.2	56184.5	41581
Q9HTM6	Q9HTM6	PA5329	Thioesterase domain-containing protein	Q9HTM6	Q9HTM6_PSEAE	>tr|Q9HTM6|Q9HTM6_PSEAE Thioesterase domain-containing protein OS=Pseudomonas aeruginosa (strain ATCC 15692 / DSM 22644 / CIP 104116 / JCM 14847 / LMG 12228 / 1C / PRS 101 / PAO1) OX=208964 GN=PA5329 PE=3 SV=1	17711.8	12660.9	11162.1	11698.7	12630.5	11643	11451.4	25299.7	33662.3	23348	22241.6	5648.79	16424.8	18739.6	13664	4339.38	6521.08	22385.9	34736.1	11725.1	10836.3	21314.2	13641.4	15351.7	11077	12021.1	15543.9	33876.4	9399.8	26334.7	26081.2	7429.77	35493.9	26237.5	4111.35	7157.68	13950.3	34164.6	5893.21	22382.6
Q9HTM7	Q9HTM7	PA5328	Probable cytochrome c(Mono-heme type)	Q9HTM7	Q9HTM7_PSEAE	>tr|Q9HTM7|Q9HTM7_PSEAE Probable cytochrome c(Mono-heme type) OS=Pseudomonas aeruginosa (strain ATCC 15692 / DSM 22644 / CIP 104116 / JCM 14847 / LMG 12228 / 1C / PRS 101 / PAO1) OX=208964 GN=PA5328 PE=4 SV=1	13501.5	251.362	320.232	156.633	NaN	408.761	983.86	908.699	1383.82	162.602	5.30368	NaN	1306.21	NaN	274.178	NaN	NaN	NaN	132.408	268.157	1.31155	382.891	400.967	NaN	792.637	7.47771	806.285	312.703	0.646044	NaN	NaN	377.512	79.1794	284.555	162.77	3981.61	0.626243	2508.14	NaN	NaN
Q9HTM8	Q9HTM8	PA5327	Probable oxidoreductase	Q9HTM8	Q9HTM8_PSEAE	>tr|Q9HTM8|Q9HTM8_PSEAE Probable oxidoreductase OS=Pseudomonas aeruginosa (strain ATCC 15692 / DSM 22644 / CIP 104116 / JCM 14847 / LMG 12228 / 1C / PRS 101 / PAO1) OX=208964 GN=PA5327 PE=4 SV=1	49435	3654.08	2769.1	5655.39	1963.36	5303.58	3880.57	2969.54	8625.13	3395.86	10045.5	9716.69	6048.33	18589.8	11833.9	6833.3	5443.34	37752.1	14253.8	12.1167	2421.3	7134.08	24117.4	5394.61	9488.54	2308.87	4707.62	5053.08	15842.4	12955.1	6630.87	5218.15	378.817	2661.56	864.284	5467.94	2118.32	9367.75	5483.03	5280.8
Q9HTN1	Q9HTN1	PA5324	Probable transcriptional regulator	Q9HTN1	Q9HTN1_PSEAE	>tr|Q9HTN1|Q9HTN1_PSEAE Probable transcriptional regulator OS=Pseudomonas aeruginosa (strain ATCC 15692 / DSM 22644 / CIP 104116 / JCM 14847 / LMG 12228 / 1C / PRS 101 / PAO1) OX=208964 GN=PA5324 PE=4 SV=1	39776.6	32032.7	23175.3	23747.8	22702.2	18555.5	38934.6	24370.4	12818	20588.2	17060.5	19475.7	20255	19894.7	21141.6	15376.4	13938	15764.4	11854.1	17463.8	23537	17208.5	19766.8	21563.7	10210.6	22527.7	16045	17358.6	10933.3	15095	7570.63	21817.8	8018.41	21511.1	24376.4	28511.3	29363.4	18281.4	25154.4	23520.9
Q9HTN2	Q9HTN2	argB	Acetylglutamate kinase	Q9HTN2	ARGB_PSEAE	>sp|Q9HTN2|ARGB_PSEAE Acetylglutamate kinase OS=Pseudomonas aeruginosa (strain ATCC 15692 / DSM 22644 / CIP 104116 / JCM 14847 / LMG 12228 / 1C / PRS 101 / PAO1) OX=208964 GN=argB PE=1 SV=3	31849.1	185249	195031	182590	195579	173502	219958	309351	389913	306387	318792	193069	241903	248615	293830	268013	272067	216950	349422	263482	184765	260514	298345	294011	231533	319284	287810	424750	312170	501475	448978	251882	387015	343226	228420	1.32265e+06	327508	416054	275061	345122
Q9HTN3	Q9HTN3	dut	Deoxyuridine 5'-triphosphate nucleotidohydrolase	Q9HTN3	DUT_PSEAE	>sp|Q9HTN3|DUT_PSEAE Deoxyuridine 5'-triphosphate nucleotidohydrolase OS=Pseudomonas aeruginosa (strain ATCC 15692 / DSM 22644 / CIP 104116 / JCM 14847 / LMG 12228 / 1C / PRS 101 / PAO1) OX=208964 GN=dut PE=3 SV=1	15920.2	61865.4	80989.1	80532.1	51501.9	74552.7	118871	125778	165544	142646	135776	73543.7	109265	126741	106817	171312	268509	76367.3	67705.2	144438	110047	122425	45824.2	91937.7	109101	109171	143226	175421	207110	170903	154783	156489	202354	154186	134905	145159	143459	120602	142474	156113
Q9HTN4	Q9HTN4	coaC	Coenzyme A biosynthesis bifunctional protein CoaBC	Q9HTN4	Q9HTN4_PSEAE	>tr|Q9HTN4|Q9HTN4_PSEAE Coenzyme A biosynthesis bifunctional protein CoaBC OS=Pseudomonas aeruginosa (strain ATCC 15692 / DSM 22644 / CIP 104116 / JCM 14847 / LMG 12228 / 1C / PRS 101 / PAO1) OX=208964 GN=coaC PE=3 SV=1	43133.4	109861	127345	116078	122922	120700	148655	111196	150668	113153	129709	102048	132241	119556	126980	138300	130245	148391	136209	139489	75447.6	116995	134678	121667	140976	137519	142864	128121	117015	155521	159884	149687	134530	156618	145851	153779	145599	141382	130650	151614
Q9HTN7	Q9HTN7	PA5317	Probable binding protein component of ABC dipeptide transporter	Q9HTN7	Q9HTN7_PSEAE	>tr|Q9HTN7|Q9HTN7_PSEAE Probable binding protein component of ABC dipeptide transporter OS=Pseudomonas aeruginosa (strain ATCC 15692 / DSM 22644 / CIP 104116 / JCM 14847 / LMG 12228 / 1C / PRS 101 / PAO1) OX=208964 GN=PA5317 PE=3 SV=1	57880.8	50175.4	58721.5	57455	54897	56773.3	61062	96155.7	119351	117172	106496	73211.5	78148.3	84897.8	69544.2	35561.5	57029.8	139553	164080	68345.4	94751.1	66988.6	52836.7	88058.9	117013	29747.8	79571.2	100630	86953.6	139263	111402	74878.5	146492	98164	36656.9	80485.4	58048.1	102229	39141.4	63877.8
Q9HTN8	Q9HTN8	rpmB	Large ribosomal subunit protein bL28	Q9HTN8	RL28_PSEAE	>sp|Q9HTN8|RL28_PSEAE Large ribosomal subunit protein bL28 OS=Pseudomonas aeruginosa (strain ATCC 15692 / DSM 22644 / CIP 104116 / JCM 14847 / LMG 12228 / 1C / PRS 101 / PAO1) OX=208964 GN=rpmB PE=1 SV=1	9065.56	752178	1.7224e+06	1.55989e+06	1.5934e+06	1868902	2.31085e+06	1.52738e+06	1.41085e+06	2.21955e+06	1.29292e+06	1.11784e+06	1.86165e+06	1.24599e+06	1.54241e+06	1.17954e+06	2.47756e+06	683971	1006106	303198	675688	1156254	866493	1.4711e+06	1.29432e+06	1.93472e+06	2425067	1.87978e+06	1.48198e+06	1.44419e+06	1.93284e+06	1.95652e+06	1685043	1.79833e+06	1.4498e+06	4.44919e+06	1.84474e+06	1.67891e+06	1168708	1.39589e+06
Q9HTN9	Q9HTN9	rpmG	Large ribosomal subunit protein bL33	Q9HTN9	RL33_PSEAE	>sp|Q9HTN9|RL33_PSEAE Large ribosomal subunit protein bL33 OS=Pseudomonas aeruginosa (strain ATCC 15692 / DSM 22644 / CIP 104116 / JCM 14847 / LMG 12228 / 1C / PRS 101 / PAO1) OX=208964 GN=rpmG PE=1 SV=1	6045.1	638755	973691	841880	870388	953262	1.16325e+06	1.07663e+06	806173	920712	781932	460659	841660	572965	773289	1.10499e+06	1.4592e+06	394605	833328	354786	96753.9	760691	698934	1.02857e+06	907668	1.22958e+06	1167613	1.09144e+06	1.29119e+06	995805	859481	1.2717e+06	940403	970638	1.78257e+06	1.66936e+06	1.36626e+06	1.0209e+06	613719	1.1012e+06
Q9HTP0	Q9HTP0	PA5314	(S)-ureidoglycine aminohydrolase cupin domain-containing protein	Q9HTP0	Q9HTP0_PSEAE	>tr|Q9HTP0|Q9HTP0_PSEAE (S)-ureidoglycine aminohydrolase cupin domain-containing protein OS=Pseudomonas aeruginosa (strain ATCC 15692 / DSM 22644 / CIP 104116 / JCM 14847 / LMG 12228 / 1C / PRS 101 / PAO1) OX=208964 GN=PA5314 PE=4 SV=1	13395	15216.5	10244.1	7416.31	11652.1	12217.2	12742.7	18758.5	22374.2	15044.1	22718.3	5755.02	20512.9	16112.5	13821.1	7906.51	4923.6	14955.2	48589.4	9639.03	4813.92	41779.5	19485.4	9750.43	10412.6	4958.29	8692.2	11437.5	3662.82	15795.8	7789.97	9742.14	8566.62	15006.3	3571.55	5543.07	11177.3	15287.1	8660.81	13622.8
Q9HTP1	Q9HTP1	PA5313	Probable pyridoxal-dependent aminotransferase	Q9HTP1	Q9HTP1_PSEAE	>tr|Q9HTP1|Q9HTP1_PSEAE Probable pyridoxal-dependent aminotransferase OS=Pseudomonas aeruginosa (strain ATCC 15692 / DSM 22644 / CIP 104116 / JCM 14847 / LMG 12228 / 1C / PRS 101 / PAO1) OX=208964 GN=PA5313 PE=3 SV=1	48347.4	116250	126639	128809	126657	120913	134490	176902	205446	207945	169851	119623	163984	127905	128333	47035.7	55985.9	192750	295997	92467	148179	236574	148366	125006	111042	82022.2	130690	62413.4	49251	132788	54962.6	93620.1	85596.6	160408	74591.9	60008.5	173491	124219	80438.5	152520
Q9HTP2	Q9HTP2	PA5312	Probable aldehyde dehydrogenase	Q9HTP2	Q9HTP2_PSEAE	>tr|Q9HTP2|Q9HTP2_PSEAE Probable aldehyde dehydrogenase OS=Pseudomonas aeruginosa (strain ATCC 15692 / DSM 22644 / CIP 104116 / JCM 14847 / LMG 12228 / 1C / PRS 101 / PAO1) OX=208964 GN=PA5312 PE=1 SV=1	53143.7	985729	1141338	1.0948e+06	1.1848e+06	1.09951e+06	930915	863457	868318	817763	752612	455305	875328	663844	695777	460391	529715	759410	896153	598350	187636	896928	907293	743224	692889	592966	868852	410821	349320	713615	398799	790166	514144	805622	700731	699993	863776	731164	552973	706317
Q9HTP4	Q9HTP4	PA5310	PLD phosphodiesterase domain-containing protein	Q9HTP4	Q9HTP4_PSEAE	>tr|Q9HTP4|Q9HTP4_PSEAE PLD phosphodiesterase domain-containing protein OS=Pseudomonas aeruginosa (strain ATCC 15692 / DSM 22644 / CIP 104116 / JCM 14847 / LMG 12228 / 1C / PRS 101 / PAO1) OX=208964 GN=PA5310 PE=4 SV=1	59199.7	11048	18962.4	15860.8	17173.8	18146.1	17827.2	12714.3	21817.5	30943.7	15302.4	11941.6	15517.8	10804.6	12419.4	9621.72	5759	22690.4	10494.5	4533.99	12598.3	15386.2	11778.1	10871.1	3336.28	8344.65	15189.3	18233.5	5271.21	24141.6	22967.7	11694.6	23388.9	13837.5	10069.1	18990.6	10075.1	18038	6414.68	16455
[truncated: 3,405 more rows]
